# Supplementary material
Source: Research Square preprint supplement (doi:10.21203/rs.3.rs-8949457/v1)
Supplement: Supplementary file 1 [file 320f644a4d3ced601e027b1f.xlsx]

## Sheet: Table S1
Supplementary Table 1. The LDSC intercept estimates for EUR-GWASs and their meta-analyses on cortical IDPs.
Cortical IDP			Meta-analysis for UKB+ENIGMA+ABCD			Meta-analysis for UKB+ABCD			UKB			ENIGMA			ABCD
Measure	Lobe	Desikan-Killiany region	λgc	LDSC intercept		λgc	LDSC intercept		λgc	LDSC intercept		λgc	LDSC intercept		λgc	LDSC intercept
				Mean	SE		Mean	SE		Mean	SE		Mean	SE		Mean	SE
Cortical surface area	Global	Total	1.275	1.0646	0.0121	1.213	1.048	0.0107	1.204	1.0386	0.0101	1.114	1.0145	0.0075	1.007	1.0095	0.0062
Cortical surface area	Frontal	Frontal Pole	1.088	1.0082	0.0081	1.071	1.0064	0.0077	1.068	1.0082	0.0077	1.023	1.0049	0.0071	1.007	1.008	0.0061
Cortical surface area	Frontal	Medial Orbitofrontal	1.133	1.0098	0.0079	1.114	1.0025	0.0075	1.106	0.999	0.0071	1.047	1.0075	0.0078	1.012	1.0038	0.0065
Cortical surface area	Frontal	Lateral Orbitofrontal	1.188	1.0196	0.0098	1.145	1.0084	0.0089	1.14	1.0119	0.0082	1.076	1.0077	0.0083	1.015	1.005	0.0061
Cortical surface area	Frontal	Rostral Anterior Cingulate	1.167	1.0273	0.0087	1.123	1.017	0.0088	1.12	1.0142	0.0083	1.087	1.029	0.0066	1.017	1.0034	0.0065
Cortical surface area	Frontal	Caudal Anterior Cingulate	1.152	1.0248	0.0087	1.108	1.0227	0.0079	1.102	1.0152	0.0079	1.058	1.0108	0.0068	1.005	1.002	0.0063
Cortical surface area	Frontal	Superior Frontal	1.202	1.0585	0.0092	1.166	1.0451	0.0082	1.163	1.0411	0.0081	1.074	1.0224	0.0066	1.018	1.0125	0.0054
Cortical surface area	Frontal	Rostral Middle Frontal	1.182	1.0357	0.0087	1.152	1.0277	0.0077	1.143	1.0259	0.0077	1.075	1.0133	0.0068	1.01	1.0008	0.0061
Cortical surface area	Frontal	Pars Orbitalis	1.171	1.0369	0.0087	1.143	1.0268	0.0087	1.131	1.0269	0.0084	1.063	1.0106	0.0069	1.004	1.0046	0.0062
Cortical surface area	Frontal	Pars Triangularis	1.159	1.0387	0.01	1.12	1.0338	0.0092	1.116	1.0323	0.0092	1.067	1.0207	0.0069	1.02	0.9935	0.0059
Cortical surface area	Frontal	Pars Opercularis	1.148	1.0115	0.0085	1.109	1.012	0.008	1.106	1.0109	0.0079	1.069	1.0183	0.0072	1.009	0.9986	0.0069
Cortical surface area	Frontal	Caudal Middle Frontal	1.171	1.0367	0.0095	1.138	1.036	0.0092	1.13	1.0282	0.0088	1.072	1.0167	0.0066	1.014	0.9993	0.006
Cortical surface area	Frontal	Paracentral	1.196	1.0331	0.0089	1.161	1.0226	0.009	1.158	1.018	0.0089	1.071	1.0055	0.0068	1.019	0.9992	0.0063
Cortical surface area	Frontal	Precentral	1.201	1.0386	0.0095	1.158	1.0265	0.0088	1.153	1.0234	0.0093	1.099	1.0168	0.0069	1.01	1.0086	0.0059
Cortical surface area	Parietal	Postcentral	1.165	1.0375	0.008	1.133	1.0356	0.0077	1.121	1.0317	0.0076	1.069	1.0228	0.0072	1.017	1.0023	0.0066
Cortical surface area	Parietal	Precuneus	1.229	1.0504	0.01	1.174	1.0396	0.0098	1.168	1.0395	0.0097	1.079	1.0058	0.0068	1.016	1.0078	0.0059
Cortical surface area	Parietal	Superior Parietal	1.211	1.0552	0.0104	1.17	1.0438	0.0095	1.167	1.0383	0.0096	1.06	1.0084	0.0071	1.014	0.9994	0.0064
Cortical surface area	Parietal	Supramarginal	1.167	1.0287	0.0086	1.134	1.0258	0.0085	1.131	1.0269	0.0083	1.062	1.013	0.0071	1.013	0.9913	0.0056
Cortical surface area	Parietal	Inferior Parietal	1.195	1.0487	0.0081	1.155	1.0402	0.0077	1.149	1.0362	0.0079	1.09	1.0235	0.0079	1.002	1.0028	0.0067
Cortical surface area	Parietal	Posterior Cingulate	1.158	1.027	0.0094	1.127	1.018	0.0097	1.121	1.0164	0.0096	1.065	1.0211	0.0067	1.004	0.9965	0.0055
Cortical surface area	Parietal	Isthmus Cingulate	1.209	1.0601	0.0094	1.164	1.0405	0.0087	1.157	1.042	0.0085	1.085	1.0411	0.0071	1.007	0.9922	0.0065
Cortical surface area	Temporal	Insula	1.226	1.0247	0.0084	1.172	1.0172	0.0085	1.168	1.0163	0.0085	1.105	1.0229	0.0077	1.019	1.0011	0.0063
Cortical surface area	Temporal	Entorhinal	1.195	1.0239	0.0097	1.169	1.024	0.0089	1.158	1.0203	0.0091	1.068	1.0143	0.0075	1.018	0.9962	0.0064
Cortical surface area	Temporal	Parahippocampal	1.174	1.0277	0.0075	1.158	1.0282	0.0074	1.148	1.0263	0.0077	1.064	1.0016	0.0066	1.023	1.0013	0.0065
Cortical surface area	Temporal	Fusiform	1.18	1.0337	0.0083	1.141	1.028	0.008	1.134	1.0245	0.0079	1.064	1.006	0.0068	1.025	1.0057	0.0068
Cortical surface area	Temporal	Inferior Temporal	1.188	1.042	0.0088	1.148	1.0237	0.0086	1.146	1.0277	0.0085	1.072	1.0144	0.0069	1.016	0.9985	0.0061
Cortical surface area	Temporal	Middle Temporal	1.202	1.0543	0.0088	1.164	1.0415	0.0077	1.161	1.0404	0.0076	1.068	1.0062	0.0074	1.023	0.9975	0.0066
Cortical surface area	Temporal	Superior Temporal	1.216	1.0357	0.0107	1.168	1.0301	0.0103	1.161	1.0322	0.0102	1.084	1.0027	0.0104	1.009	0.9961	0.0058
Cortical surface area	Temporal	Banks of the Superior Temporal Sulcus	1.154	1.0325	0.0082	1.125	1.0275	0.0077	1.122	1.0246	0.0077	1.048	1.0057	0.0065	1.008	0.9966	0.0065
Cortical surface area	Temporal	Transverse Temporal	1.181	1.0232	0.0086	1.138	1.017	0.0075	1.135	1.0199	0.0078	1.081	0.9968	0.0077	1.018	1.0008	0.006
Cortical surface area	Occipital	Lingual	1.245	1.0703	0.0091	1.194	1.0469	0.009	1.182	1.0445	0.0089	1.109	1.0543	0.0071	1.029	1.0141	0.0059
Cortical surface area	Occipital	Pericalcarine	1.261	1.0787	0.0101	1.208	1.0593	0.0093	1.198	1.0566	0.0093	1.095	1.0233	0.0077	1.02	1.0137	0.0058
Cortical surface area	Occipital	Cuneus	1.227	1.0522	0.0096	1.189	1.0469	0.0087	1.18	1.0418	0.0087	1.076	1.0095	0.0074	1.014	1.0073	0.0059
Cortical surface area	Occipital	Lateral Occipital	1.206	1.0489	0.0089	1.169	1.0505	0.0089	1.158	1.0519	0.0089	1.084	0.9959	0.0067	1.027	0.9959	0.0061
Cortical thickness	Global	Mean	1.201	1.0286	0.0096	1.155	1.0207	0.009	1.144	1.0152	0.0086	1.102	1.0177	0.0076	1.022	0.9882	0.0068
Cortical thickness	Frontal	Frontal Pole	1.084	1.0103	0.0074	1.074	1.0079	0.0064	1.071	1.0116	0.0065	1.011	1.0095	0.0063	1.015	1.0038	0.006
Cortical thickness	Frontal	Medial Orbitofrontal	1.126	1.0177	0.007	1.103	1.0197	0.0072	1.097	1.0176	0.007	1.04	1.0113	0.007	1.002	1.0071	0.0061
Cortical thickness	Frontal	Lateral Orbitofrontal	1.118	1.0171	0.0066	1.1	1.0104	0.0072	1.094	1.0109	0.0073	1.043	1.0097	0.0063	1.012	0.9952	0.0063
Cortical thickness	Frontal	Rostral Anterior Cingulate	1.122	1.0161	0.0079	1.104	1.0117	0.0076	1.098	1.0128	0.0076	1.048	1.0098	0.0061	1.004	1.0041	0.0057
Cortical thickness	Frontal	Caudal Anterior Cingulate	1.128	1.0178	0.0079	1.1	1.0184	0.0075	1.101	1.0168	0.0074	1.059	1.0075	0.007	1.017	0.9912	0.0061
Cortical thickness	Frontal	Superior Frontal	1.174	1.0328	0.008	1.152	1.0283	0.0076	1.146	1.0287	0.0077	1.048	1.0042	0.0063	1.021	1.014	0.0061
Cortical thickness	Frontal	Rostral Middle Frontal	1.144	1.0162	0.0077	1.119	1.0141	0.007	1.113	1.0163	0.0069	1.049	1.0104	0.0067	1.01	1.0008	0.0066
Cortical thickness	Frontal	Pars Orbitalis	1.113	1.0211	0.0077	1.102	1.0086	0.0069	1.095	1.0106	0.0066	1.037	1.0167	0.0068	1.02	1.0027	0.0066
Cortical thickness	Frontal	Pars Triangularis	1.122	1.0241	0.0068	1.101	1.0241	0.0071	1.097	1.0269	0.0068	1.046	0.9977	0.0061	1.006	0.9977	0.0059
Cortical thickness	Frontal	Pars Opercularis	1.1	1.0243	0.0076	1.074	1.021	0.0072	1.078	1.0209	0.0069	1.042	1.0043	0.0065	0.998	0.9979	0.0059
Cortical thickness	Frontal	Caudal Middle Frontal	1.135	1.0095	0.0066	1.102	1.0109	0.0069	1.098	1.0078	0.0068	1.036	0.9911	0.0059	1.013	1.0027	0.0056
Cortical thickness	Frontal	Paracentral	1.13	1.0021	0.0088	1.124	1.0073	0.0087	1.13	1.0038	0.0085	1.029	0.9955	0.0066	1.003	1.0062	0.006
Cortical thickness	Frontal	Precentral	1.137	1.0175	0.0084	1.112	1.0109	0.0086	1.105	1.0077	0.008	1.045	1.0075	0.0068	1.022	1.0092	0.006
Cortical thickness	Parietal	Postcentral	1.186	1.0402	0.0077	1.152	1.0333	0.0077	1.143	1.0288	0.0079	1.053	1.0119	0.0072	1.017	0.9958	0.0067
Cortical thickness	Parietal	Precuneus	1.136	1.0242	0.0077	1.104	1.0214	0.0075	1.099	1.0207	0.0074	1.036	1.0156	0.0071	1.016	1.0064	0.0058
Cortical thickness	Parietal	Superior Parietal	1.136	1.0408	0.0073	1.107	1.0441	0.0075	1.102	1.0451	0.0078	1.028	0.9997	0.0068	1.012	1.0034	0.0055
Cortical thickness	Parietal	Supramarginal	1.132	1.0277	0.0079	1.103	1.0153	0.0078	1.097	1.0171	0.0078	1.045	1.0041	0.0072	1.012	0.9996	0.0063
Cortical thickness	Parietal	Inferior Parietal	1.14	1.015	0.008	1.108	1.0115	0.0078	1.104	1.0101	0.0076	1.05	1.0016	0.0064	1.007	1.0068	0.0058
Cortical thickness	Parietal	Posterior Cingulate	1.154	1.0295	0.0076	1.112	1.0177	0.0072	1.111	1.0149	0.0074	1.073	1.0197	0.0072	1.005	0.9956	0.0062
Cortical thickness	Parietal	Isthmus Cingulate	1.195	1.0546	0.0089	1.147	1.0453	0.0092	1.137	1.0457	0.009	1.097	1.0175	0.007	1.014	0.9955	0.0058
Cortical thickness	Temporal	Insula	1.148	1.0226	0.0078	1.126	1.0224	0.0079	1.121	1.0228	0.0081	1.052	1.0004	0.0064	1.009	1.01	0.0065
Cortical thickness	Temporal	Entorhinal	1.096	1.0224	0.0068	1.083	1.0261	0.0068	1.083	1.0212	0.0068	1.034	1.0037	0.0063	1.006	1.0124	0.0062
Cortical thickness	Temporal	Parahippocampal	1.204	1.0412	0.0091	1.167	1.0402	0.0091	1.155	1.0404	0.0085	1.072	1.0065	0.0072	1.021	0.9901	0.0061
Cortical thickness	Temporal	Fusiform	1.12	1.0241	0.0077	1.101	1.0197	0.0081	1.095	1.0225	0.0078	1.032	1.0052	0.0062	1.004	0.9987	0.0061
Cortical thickness	Temporal	Inferior Temporal	1.146	1.006	0.0085	1.125	1.0057	0.009	1.122	1.0057	0.0086	1.036	0.996	0.0062	1.01	0.9957	0.0065
Cortical thickness	Temporal	Middle Temporal	1.144	1.015	0.0072	1.122	1.0094	0.0073	1.116	1.007	0.0072	1.05	1.0078	0.006	1.008	1.0129	0.0064
Cortical thickness	Temporal	Superior Temporal	1.197	1.0392	0.0076	1.157	1.0258	0.007	1.146	1.0238	0.0069	1.06	0.9997	0.007	1.009	0.9992	0.0063
Cortical thickness	Temporal	Banks of the Superior Temporal Sulcus	1.099	1.0105	0.0068	1.085	1.0112	0.0066	1.08	1.0069	0.0067	1.023	1.0046	0.006	1.014	1.0029	0.0059
Cortical thickness	Temporal	Transverse Temporal	1.163	1.0058	0.0083	1.119	1.0066	0.0077	1.115	1.013	0.0073	1.06	1.0026	0.0066	1.014	0.994	0.0063
Cortical thickness	Occipital	Lingual	1.178	1.0209	0.0077	1.147	1.02	0.0083	1.14	1.0201	0.0084	1.051	1.0138	0.0059	1.031	1.0048	0.0065
Cortical thickness	Occipital	Pericalcarine	1.156	1.0333	0.0078	1.133	1.029	0.0081	1.121	1.0255	0.0083	1.053	1.022	0.0064	1.014	0.9954	0.0066
Cortical thickness	Occipital	Cuneus	1.171	1.0168	0.0083	1.145	1.0125	0.0088	1.141	1.008	0.0084	1.045	1.0172	0.0058	1.026	1.0107	0.0057
Cortical thickness	Occipital	Lateral Occipital	1.159	1.0205	0.0086	1.133	1.0118	0.0081	1.127	1.0112	0.0082	1.049	1.0113	0.0069	1.026	1.007	0.0061

## Sheet: Table S2
Supplementary Table 2. Heritability estimates for cortical IDPs based on EUR-GWAS meta-analyses (n = 80,935).
Cortical IDP			Heritability
Measure	Lobe	Desikan-Killiany region	h2	SE
Cortical surface area	Global	Total	0.3483	0.0219
Cortical surface area	Frontal	Frontal Pole	0.0926	0.01
Cortical surface area	Frontal	Medial Orbitofrontal	0.1582	0.0107
Cortical surface area	Frontal	Lateral Orbitofrontal	0.2528	0.0165
Cortical surface area	Frontal	Rostral Anterior Cingulate	0.1713	0.0114
Cortical surface area	Frontal	Caudal Anterior Cingulate	0.1533	0.0109
Cortical surface area	Frontal	Superior Frontal	0.2222	0.0138
Cortical surface area	Frontal	Rostral Middle Frontal	0.2287	0.0127
Cortical surface area	Frontal	Pars Orbitalis	0.2049	0.0121
Cortical surface area	Frontal	Pars Triangularis	0.1924	0.0152
Cortical surface area	Frontal	Pars Opercularis	0.1831	0.0118
Cortical surface area	Frontal	Caudal Middle Frontal	0.2032	0.0134
Cortical surface area	Frontal	Paracentral	0.204	0.0118
Cortical surface area	Frontal	Precentral	0.2357	0.0225
Cortical surface area	Parietal	Postcentral	0.1832	0.0135
Cortical surface area	Parietal	Precuneus	0.2786	0.0164
Cortical surface area	Parietal	Superior Parietal	0.2265	0.0141
Cortical surface area	Parietal	Supramarginal	0.1996	0.0134
Cortical surface area	Parietal	Inferior Parietal	0.2197	0.0131
Cortical surface area	Parietal	Posterior Cingulate	0.1806	0.0127
Cortical surface area	Parietal	Isthmus Cingulate	0.2176	0.0124
Cortical surface area	Temporal	Insula	0.2397	0.0126
Cortical surface area	Temporal	Entorhinal	0.2081	0.0125
Cortical surface area	Temporal	Parahippocampal	0.2107	0.0117
Cortical surface area	Temporal	Fusiform	0.1957	0.012
Cortical surface area	Temporal	Inferior Temporal	0.197	0.0126
Cortical surface area	Temporal	Middle Temporal	0.234	0.0142
Cortical surface area	Temporal	Superior Temporal	0.257	0.0197
Cortical surface area	Temporal	Banks of the Superior Temporal Sulcus	0.1733	0.0123
Cortical surface area	Temporal	Transverse Temporal	0.2252	0.0131
Cortical surface area	Occipital	Lingual	0.302	0.0165
Cortical surface area	Occipital	Pericalcarine	0.3603	0.0213
Cortical surface area	Occipital	Cuneus	0.2869	0.0172
Cortical surface area	Occipital	Lateral Occipital	0.2621	0.0148
Cortical thickness	Global	Mean	0.2295	0.0144
Cortical thickness	Frontal	Frontal Pole	0.0847	0.0072
Cortical thickness	Frontal	Medial Orbitofrontal	0.117	0.0091
Cortical thickness	Frontal	Lateral Orbitofrontal	0.1158	0.0074
Cortical thickness	Frontal	Rostral Anterior Cingulate	0.1251	0.0089
Cortical thickness	Frontal	Caudal Anterior Cingulate	0.128	0.0096
Cortical thickness	Frontal	Superior Frontal	0.1765	0.0114
Cortical thickness	Frontal	Rostral Middle Frontal	0.1408	0.009
Cortical thickness	Frontal	Pars Orbitalis	0.0919	0.0075
Cortical thickness	Frontal	Pars Triangularis	0.1182	0.0089
Cortical thickness	Frontal	Pars Opercularis	0.0966	0.009
Cortical thickness	Frontal	Caudal Middle Frontal	0.1377	0.0092
Cortical thickness	Frontal	Paracentral	0.1472	0.0113
Cortical thickness	Frontal	Precentral	0.1393	0.0096
Cortical thickness	Parietal	Postcentral	0.2145	0.0185
Cortical thickness	Parietal	Precuneus	0.1422	0.0095
Cortical thickness	Parietal	Superior Parietal	0.1392	0.0103
Cortical thickness	Parietal	Supramarginal	0.1182	0.0101
Cortical thickness	Parietal	Inferior Parietal	0.1351	0.0097
Cortical thickness	Parietal	Posterior Cingulate	0.1703	0.0113
Cortical thickness	Parietal	Isthmus Cingulate	0.2008	0.0124
Cortical thickness	Temporal	Insula	0.1545	0.0105
Cortical thickness	Temporal	Entorhinal	0.0889	0.0079
Cortical thickness	Temporal	Parahippocampal	0.2194	0.0124
Cortical thickness	Temporal	Fusiform	0.1058	0.0079
Cortical thickness	Temporal	Inferior Temporal	0.1543	0.0117
Cortical thickness	Temporal	Middle Temporal	0.1428	0.0091
Cortical thickness	Temporal	Superior Temporal	0.2086	0.0107
Cortical thickness	Temporal	Banks of the Superior Temporal Sulcus	0.1013	0.0083
Cortical thickness	Temporal	Transverse Temporal	0.1844	0.0103
Cortical thickness	Occipital	Lingual	0.182	0.0109
Cortical thickness	Occipital	Pericalcarine	0.1522	0.0102
Cortical thickness	Occipital	Cuneus	0.1869	0.0107
Cortical thickness	Occipital	Lateral Occipital	0.1749	0.0108

## Sheet: Table S3
Supplementary Table 3. Significant variant-trait associations (P < 7.35 × 10-10 ) for cortical IDPs identified by EUR-GWAS meta-analyses.
Cortical IDP			Variant						Statistics			Locus
Measure	Lobe	Desikan-Killiany region	CHR	BP	SNP	Effect allele	Other allele	AF of effect allele	N	Z-score	P	Lower boundary	Upper boundary	Unreported (P < 7.35 × 10-10)
Cortical surface area	Frontal	Caudal Anterior Cingulate	1	8838528	rs12123076	A	G	0.6883	78176	-6.252	4.064e-10	8389316	9138842	YES
Cortical surface area	Frontal	Caudal Anterior Cingulate	1	19973920	rs2854108	A	G	0.7636	77624	8.367	5.91e-17	19570158	20223920	NO
Cortical surface area	Frontal	Caudal Anterior Cingulate	2	145733044	2:145733044_CA_C	CA	C	0.6942	54588	-6.198	5.723e-10	145384153	146048807	NO
Cortical surface area	Frontal	Caudal Anterior Cingulate	5	82844728	rs309596	T	C	0.2047	79731	-11.665	1.93e-31	82577762	83185601	NO
Cortical surface area	Frontal	Caudal Anterior Cingulate	5	121518309	rs9112	A	G	0.4087	74458	6.174	6.659e-10	121268309	121768309	NO
Cortical surface area	Frontal	Caudal Anterior Cingulate	5	127809413	rs11949017	T	C	0.1118	79802	6.298	3.021e-10	127537610	128311057	NO
Cortical surface area	Frontal	Caudal Anterior Cingulate	7	117609096	rs10264112	A	G	0.3983	78857	6.318	2.653e-10	117349514	117885382	NO
Cortical surface area	Frontal	Caudal Anterior Cingulate	8	23104195	rs2294123	T	G	0.3961	79623	7.286	3.199e-13	22846594	23368503	NO
Cortical surface area	Frontal	Caudal Anterior Cingulate	8	93212850	rs1444497	A	G	0.424	78986	-6.629	3.382e-11	92940014	93494504	NO
Cortical surface area	Frontal	Caudal Middle Frontal	1	223945582	rs12563695	T	G	0.1152	77030	6.434	1.247e-10	223634232	224299363	NO
Cortical surface area	Frontal	Caudal Middle Frontal	2	33106185	rs7568098	A	G	0.3051	79662	6.367	1.928e-10	32810719	33373701	NO
Cortical surface area	Frontal	Caudal Middle Frontal	2	54615325	rs79272390	T	C	0.1564	77311	6.543	6.033e-11	54365325	54865325	NO
Cortical surface area	Frontal	Caudal Middle Frontal	2	65964550	rs11126057	A	G	0.3848	79768	9.375	6.913e-21	65687041	66256558	NO
Cortical surface area	Frontal	Caudal Middle Frontal	2	105454590	rs10197031	T	C	0.7165	79642	-6.886	5.719e-12	105164479	105737651	NO
Cortical surface area	Frontal	Caudal Middle Frontal	2	218667372	rs3791979	T	C	0.3939	72854	6.553	5.631e-11	218417372	218933154	NO
Cortical surface area	Frontal	Caudal Middle Frontal	3	48478088	rs4858819	T	C	0.2697	79033	6.325	2.536e-10	48228088	49802704	NO
Cortical surface area	Frontal	Caudal Middle Frontal	3	193532498	rs58396760	C	G	0.2854	77691	-7.343	2.082e-13	193239784	193839384	NO
Cortical surface area	Frontal	Caudal Middle Frontal	3	193576974	rs11710371	A	T	0.3718	78366	-6.61	3.843e-11	193255620	193841466	NO
Cortical surface area	Frontal	Caudal Middle Frontal	4	1796636	rs3135842	C	G	0.27	68006	7.202	5.927e-13	1544188	2047741	NO
Cortical surface area	Frontal	Caudal Middle Frontal	5	128734008	rs12187568	C	G	0.9264	52948	-8.762	1.917e-18	128484008	129304770	NO
Cortical surface area	Frontal	Caudal Middle Frontal	5	128918224	rs6889316	A	G	0.7946	80062	-7.236	4.619e-13	128626340	129353253	NO
Cortical surface area	Frontal	Caudal Middle Frontal	6	21185590	rs9465985	A	G	0.6234	79246	-6.208	5.376e-10	20890486	21455221	NO
Cortical surface area	Frontal	Caudal Middle Frontal	6	91906278	rs4324751	C	G	0.2771	79501	-6.993	2.694e-12	91631157	92185053	NO
Cortical surface area	Frontal	Caudal Middle Frontal	6	92002653	rs9345125	A	G	0.8252	79722	11.857	1.991e-32	91620804	92266259	NO
Cortical surface area	Frontal	Caudal Middle Frontal	6	126707528	rs1338839	T	G	0.8306	78462	7.911	2.549e-15	126392219	127269846	NO
Cortical surface area	Frontal	Caudal Middle Frontal	6	126964510	rs4273712	A	G	0.7318	79141	-14.373	7.619e-47	126373947	127501021	NO
Cortical surface area	Frontal	Caudal Middle Frontal	6	138871792	rs9399247	T	C	0.2801	79227	-7.031	2.048e-12	138575219	139123329	NO
Cortical surface area	Frontal	Caudal Middle Frontal	7	43052217	rs7785510	A	G	0.7565	79298	6.573	4.918e-11	42777580	43347356	NO
Cortical surface area	Frontal	Caudal Middle Frontal	7	96215107	rs4335059	T	C	0.6706	78054	8.226	1.93e-16	95900233	96599297	NO
Cortical surface area	Frontal	Caudal Middle Frontal	8	20214697	rs12542760	C	G	0.3258	79678	7.31	2.677e-13	19943583	20532070	YES
Cortical surface area	Frontal	Caudal Middle Frontal	9	111236780	rs2417865	T	C	0.3684	79161	-6.352	2.132e-10	110925413	111545727	YES
Cortical surface area	Frontal	Caudal Middle Frontal	10	50283154	rs35905744	A	G	0.7047	78639	-6.4	1.553e-10	50003187	50622347	NO
Cortical surface area	Frontal	Caudal Middle Frontal	10	102245664	rs149658356	T	C	0.9814	56526	-6.208	5.363e-10	101995664	102574683	NO
Cortical surface area	Frontal	Caudal Middle Frontal	10	126851739	rs28414241	A	T	0.578	78781	6.589	4.414e-11	126592554	127112256	NO
Cortical surface area	Frontal	Caudal Middle Frontal	13	107645987	rs9587275	T	G	0.3762	79563	-6.42	1.366e-10	107357404	107932639	NO
Cortical surface area	Frontal	Caudal Middle Frontal	16	52549935	rs1362546	T	C	0.4654	74915	8.713	2.959e-18	52286885	52896376	NO
Cortical surface area	Frontal	Caudal Middle Frontal	16	69107912	rs9939748	T	C	0.107	79638	6.252	4.056e-10	68788351	69385688	NO
Cortical surface area	Frontal	Caudal Middle Frontal	16	86710660	rs10048146	A	G	0.8104	79768	-7.232	4.753e-13	86436972	86964715	NO
Cortical surface area	Frontal	Caudal Middle Frontal	18	334742	rs2305027	T	C	0.4944	74129	6.364	1.972e-10	84742	585675	NO
Cortical surface area	Frontal	Caudal Middle Frontal	22	43788830	rs5996329	C	G	0.3677	78282	-7.103	1.221e-12	43538830	44074009	NO
Cortical surface area	Frontal	Frontal Pole	2	187586599	rs13033579	C	G	0.7024	78480	6.388	1.676e-10	187248107	187838880	NO
Cortical surface area	Frontal	Frontal Pole	2	188278203	rs17464221	T	C	0.2953	78101	-10.187	2.263e-24	187370297	188724978	NO
Cortical surface area	Frontal	Frontal Pole	12	106476805	rs12146713	T	C	0.9065	79928	7.232	4.761e-13	106193251	106760413	NO
Cortical surface area	Frontal	Frontal Pole	17	44837217	rs199529	A	C	0.7707	79819	-7.049	1.799e-12	43221489	45115603	NO
Cortical surface area	Frontal	Lateral Orbitofrontal	1	19968058	rs12408663	T	C	0.763	78415	-8.057	7.814e-16	19570158	20223920	NO
Cortical surface area	Frontal	Lateral Orbitofrontal	1	113063125	rs910697	A	G	0.5376	79405	-6.201	5.623e-10	112804659	113486087	NO
Cortical surface area	Frontal	Lateral Orbitofrontal	1	119795854	rs12724488	T	C	0.8806	79780	-8.373	5.607e-17	119545854	120082202	NO
Cortical surface area	Frontal	Lateral Orbitofrontal	1	154251428	rs11586902	T	C	0.463	79501	6.247	4.191e-10	153871510	154501428	NO
Cortical surface area	Frontal	Lateral Orbitofrontal	1	155033308	rs11589479	A	G	0.1686	79881	6.472	9.669e-11	154776942	155292886	NO
Cortical surface area	Frontal	Lateral Orbitofrontal	1	228144058	rs11800176	T	G	0.8269	79132	-7.979	1.477e-15	227854559	228641808	NO
Cortical surface area	Frontal	Lateral Orbitofrontal	2	32804106	rs62136336	A	G	0.6357	73753	6.443	1.175e-10	32249150	33104668	NO
Cortical surface area	Frontal	Lateral Orbitofrontal	2	55607323	rs7564292	A	G	0.6011	79827	6.187	6.14e-10	55312692	55913556	NO
Cortical surface area	Frontal	Lateral Orbitofrontal	2	60230735	rs11693339	T	C	0.7265	79881	-7.639	2.193e-14	59885522	60509060	NO
Cortical surface area	Frontal	Lateral Orbitofrontal	2	71786153	rs6737150	T	C	0.242	78280	7.667	1.761e-14	71517322	72036153	NO
Cortical surface area	Frontal	Lateral Orbitofrontal	3	37535866	rs539108	A	G	0.5725	78714	6.833	8.316e-12	37282658	37848382	NO
Cortical surface area	Frontal	Lateral Orbitofrontal	3	56066102	rs1519038	T	C	0.6704	79143	-6.223	4.878e-10	55723123	56352313	NO
Cortical surface area	Frontal	Lateral Orbitofrontal	3	88481090	rs6795028	A	G	0.3656	79198	6.502	7.921e-11	88231090	88783734	NO
Cortical surface area	Frontal	Lateral Orbitofrontal	3	99012573	rs7427078	T	C	0.3857	78813	-6.236	4.483e-10	98728987	99262573	NO
Cortical surface area	Frontal	Lateral Orbitofrontal	3	147033897	rs113270900	C	G	0.7559	79613	-7.95	1.866e-15	146621363	147343600	NO
Cortical surface area	Frontal	Lateral Orbitofrontal	3	147096847	rs1394041	A	C	0.117	79293	6.17	6.824e-10	146846847	147387674	NO
Cortical surface area	Frontal	Lateral Orbitofrontal	4	48486598	rs11945562	T	C	0.4847	79498	7.292	3.052e-13	48107527	49314487	NO
Cortical surface area	Frontal	Lateral Orbitofrontal	4	77560811	rs17322529	A	G	0.4945	78838	-6.161	7.218e-10	77272831	77902219	NO
Cortical surface area	Frontal	Lateral Orbitofrontal	4	187384018	rs62348889	T	C	0.1508	80029	6.214	5.166e-10	187116735	187640722	NO
Cortical surface area	Frontal	Lateral Orbitofrontal	5	122005445	rs62377370	A	G	0.1627	79113	7.911	2.563e-15	121755445	122647779	NO
Cortical surface area	Frontal	Lateral Orbitofrontal	5	122314954	rs4836353	A	G	0.342	79747	-8.978	2.761e-19	121718335	122681362	NO
Cortical surface area	Frontal	Lateral Orbitofrontal	6	1388229	rs112202910	C	G	0.2574	68126	7.457	8.847e-14	1137572	1639548	YES
Cortical surface area	Frontal	Lateral Orbitofrontal	6	7131436	rs11243145	A	G	0.6289	78492	-7.937	2.068e-15	6806502	7505015	NO
Cortical surface area	Frontal	Lateral Orbitofrontal	6	44445046	rs9296436	A	G	0.4711	78138	6.778	1.215e-11	44190781	44699697	NO
Cortical surface area	Frontal	Lateral Orbitofrontal	6	126730543	rs576049	T	G	0.5403	79060	-13.806	2.33e-43	126373947	127435801	NO
Cortical surface area	Frontal	Lateral Orbitofrontal	6	127166751	rs55815739	A	G	0.2003	78614	-6.235	4.524e-10	126916751	127429594	NO
Cortical surface area	Frontal	Lateral Orbitofrontal	6	157325487	rs138727422	G	GT	0.736	78867	6.815	9.407e-12	157016505	157652041	NO
Cortical surface area	Frontal	Lateral Orbitofrontal	7	18672384	rs801540	T	G	0.603	79689	6.787	1.143e-11	18386561	18924040	NO
Cortical surface area	Frontal	Lateral Orbitofrontal	7	19449813	rs12056033	A	C	0.3304	56410	6.474	9.532e-11	19190352	19714027	NO
Cortical surface area	Frontal	Lateral Orbitofrontal	7	19520977	rs73685918	A	G	0.0511	79596	7.203	5.901e-13	19232982	19906653	NO
Cortical surface area	Frontal	Lateral Orbitofrontal	7	19611753	rs10807794	T	C	0.3703	79552	15.993	1.436e-57	19197162	19904476	NO
Cortical surface area	Frontal	Lateral Orbitofrontal	7	20834410	rs73087577	T	C	0.0585	79881	-6.646	3.008e-11	20584410	21135992	NO
Cortical surface area	Frontal	Lateral Orbitofrontal	7	96155985	rs754036861	G	GGGCTCT	0.2668	56194	6.273	3.538e-10	95871636	96581727	NO
Cortical surface area	Frontal	Lateral Orbitofrontal	7	116841114	rs144212237	A	G	0.9655	75106	-6.819	9.156e-12	116577738	117091114	NO
Cortical surface area	Frontal	Lateral Orbitofrontal	8	10516185	rs4841407	A	G	0.5626	79724	-6.473	9.614e-11	8041298	11939228	NO
Cortical surface area	Frontal	Lateral Orbitofrontal	8	25816376	rs4872381	T	C	0.5053	79689	7.798	6.295e-15	25562543	26080386	YES
Cortical surface area	Frontal	Lateral Orbitofrontal	8	78174889	rs62517014	A	G	0.2131	79791	-6.768	1.302e-11	77769019	78430278	NO
Cortical surface area	Frontal	Lateral Orbitofrontal	8	117458404	rs9297555	T	C	0.7853	79166	6.445	1.159e-10	117207413	117719041	NO
Cortical surface area	Frontal	Lateral Orbitofrontal	8	120596023	rs10283100	A	G	0.0557	72718	-8.31	9.555e-17	120346023	120952717	NO
Cortical surface area	Frontal	Lateral Orbitofrontal	8	120697891	rs1347278	A	G	0.3737	79832	7.9	2.79e-15	120342202	120960339	NO
Cortical surface area	Frontal	Lateral Orbitofrontal	10	21811487	rs11012730	A	G	0.3569	79002	-9.818	9.398e-23	21384273	22538132	NO
Cortical surface area	Frontal	Lateral Orbitofrontal	10	32082658	rs10826995	T	C	0.7112	79521	6.529	6.613e-11	31826799	32527385	NO
Cortical surface area	Frontal	Lateral Orbitofrontal	11	19806981	rs71488717	T	C	0.0986	78669	-6.631	3.344e-11	19556019	20070883	NO
Cortical surface area	Frontal	Lateral Orbitofrontal	11	20108492	rs11025381	T	G	0.4865	78864	6.234	4.544e-10	19849449	20362823	NO
Cortical surface area	Frontal	Lateral Orbitofrontal	11	92496152	rs6483188	T	C	0.3278	79781	6.674	2.493e-11	92024668	92808342	NO
Cortical surface area	Frontal	Lateral Orbitofrontal	11	110892082	rs161138	T	G	0.3821	79678	-7.476	7.672e-14	110605214	111172885	NO
Cortical surface area	Frontal	Lateral Orbitofrontal	12	65905126	rs79487293	T	C	0.3207	78876	-8.577	9.722e-18	65644817	66155126	NO
Cortical surface area	Frontal	Lateral Orbitofrontal	12	83969100	rs324768	A	G	0.6125	79569	-6.325	2.535e-10	83688605	84250777	NO
Cortical surface area	Frontal	Lateral Orbitofrontal	13	81280726	rs9574726	A	G	0.6312	78831	6.416	1.4e-10	80931452	81589544	NO
Cortical surface area	Frontal	Lateral Orbitofrontal	14	54724054	rs2358483	T	C	0.3026	79038	-9.384	6.353e-21	54245711	55043115	NO
Cortical surface area	Frontal	Lateral Orbitofrontal	14	95336049	rs72700900	T	C	0.0879	78213	6.67	2.561e-11	95081325	95590309	NO
Cortical surface area	Frontal	Lateral Orbitofrontal	14	98364514	rs2809145	A	C	0.2265	78734	6.735	1.645e-11	98092807	98679169	NO
Cortical surface area	Frontal	Lateral Orbitofrontal	17	69120695	rs8074361	A	G	0.5772	79415	-10.814	2.945e-27	68820190	69492932	NO
Cortical surface area	Frontal	Lateral Orbitofrontal	21	34172310	rs2833958	T	C	0.7681	79865	-7.102	1.234e-12	33848391	34540882	NO
Cortical surface area	Frontal	Lateral Orbitofrontal	21	34284361	rs28464592	A	C	0.2488	78859	-8.853	8.482e-19	33824505	34586375	NO
Cortical surface area	Frontal	Lateral Orbitofrontal	21	34343695	rs13050233	A	C	0.612	79410	-7.797	6.351e-15	33941308	34608825	NO
Cortical surface area	Frontal	Lateral Orbitofrontal	22	28356600	rs118173451	T	C	0.9841	56909	6.293	3.108e-10	28091062	29428414	YES
Cortical surface area	Frontal	Medial Orbitofrontal	1	47980916	rs6658111	T	G	0.6339	78841	7.079	1.456e-12	47694812	48230916	NO
Cortical surface area	Frontal	Medial Orbitofrontal	4	19073685	rs12508031	A	T	0.6585	63917	6.576	4.827e-11	18823685	19326272	NO
Cortical surface area	Frontal	Medial Orbitofrontal	5	102087388	rs143003124	G	GAC	0.5677	78510	-6.58	4.704e-11	101790379	102892673	NO
Cortical surface area	Frontal	Medial Orbitofrontal	6	126760994	rs2184968	T	C	0.541	79303	-7.939	2.035e-15	126409043	127417072	NO
Cortical surface area	Frontal	Medial Orbitofrontal	7	19611753	rs10807794	T	C	0.3705	79369	9.629	6.038e-22	19278238	19904201	NO
Cortical surface area	Frontal	Medial Orbitofrontal	10	50306022	rs10857434	T	C	0.2258	79040	-6.823	8.915e-12	49980127	50631231	NO
Cortical surface area	Frontal	Medial Orbitofrontal	12	106476805	rs12146713	T	C	0.9064	79698	-7.388	1.49e-13	106226805	106760413	NO
Cortical surface area	Frontal	Medial Orbitofrontal	15	55983271	rs1986012	T	C	0.744	78763	-7.424	1.139e-13	55631107	56281026	NO
Cortical surface area	Frontal	Medial Orbitofrontal	17	44095724	rs35032782	T	TA	0.8248	56549	6.424	1.328e-10	43684256	44912558	NO
Cortical surface area	Frontal	Medial Orbitofrontal	19	52182363	rs7255413	C	G	0.7336	79879	-6.235	4.504e-10	51932363	52432363	YES
Cortical surface area	Frontal	Paracentral	1	47980916	rs6658111	T	G	0.6339	78815	13.539	9.248e-42	47462057	48251930	NO
Cortical surface area	Frontal	Paracentral	2	98275354	rs11692435	A	G	0.0872	73930	6.302	2.933e-10	97345403	98525354	YES
Cortical surface area	Frontal	Paracentral	3	147160015	rs754715969	T	TAA	0.7318	43989	8.188	2.661e-16	146845042	147518599	NO
Cortical surface area	Frontal	Paracentral	5	92849721	rs31465	T	G	0.4357	78685	7.644	2.101e-14	92433734	93677260	NO
Cortical surface area	Frontal	Paracentral	6	44041400	rs72867280	A	G	0.2439	78468	-6.569	5.064e-11	43788822	44291400	NO
Cortical surface area	Frontal	Paracentral	6	126107719	6:126107719_CTTT_C	CTTT	C	0.4278	48517	8.012	1.133e-15	125773555	126372280	NO
Cortical surface area	Frontal	Paracentral	7	83143425	rs1011958	A	T	0.2074	78065	-6.226	4.775e-10	82888551	83416902	YES
Cortical surface area	Frontal	Paracentral	8	8709998	rs746391978	CACACAT	C	0.639	50796	6.292	3.136e-10	8394274	10334394	NO
Cortical surface area	Frontal	Paracentral	8	57201675	rs62515458	A	G	0.2301	79121	6.39	1.664e-10	56859358	57460606	NO
Cortical surface area	Frontal	Paracentral	9	139347526	9:139347526_AAAAAAAAAAG_A	A	AAAAAAAAAAG	0.2761	52046	-6.694	2.166e-11	139069847	139637676	NO
Cortical surface area	Frontal	Paracentral	11	47568344	rs10838726	C	G	0.6982	79639	6.981	2.934e-12	47026675	48193419	NO
Cortical surface area	Frontal	Paracentral	11	92417312	rs1458326	A	G	0.6834	78983	-6.57	5.032e-11	92067858	92778965	NO
Cortical surface area	Frontal	Paracentral	12	106476805	rs12146713	T	C	0.9063	79671	-9.531	1.559e-21	106193251	106760413	NO
Cortical surface area	Frontal	Paracentral	13	80173760	rs9545145	A	G	0.4928	79576	7.24	4.474e-13	79918720	80501200	NO
Cortical surface area	Frontal	Paracentral	15	87922530	rs8023472	A	C	0.3796	78324	-6.459	1.052e-10	87660115	88254961	NO
Cortical surface area	Frontal	Paracentral	16	69000416	rs56083051	A	T	0.1012	79007	6.2	5.658e-10	68667655	69383966	NO
Cortical surface area	Frontal	Paracentral	17	1965085	rs7214308	T	C	0.7397	79217	-7.471	7.971e-14	1677141	2479067	NO
Cortical surface area	Frontal	Paracentral	17	7521761	17:7521761_GTTTTTT_G	G	GTTTTTT	0.1258	51955	6.619	3.612e-11	7212555	7786527	NO
Cortical surface area	Frontal	Pars Opercularis	1	17327429	rs7550758	T	C	0.5072	79563	-7.401	1.349e-13	17056029	17660364	NO
Cortical surface area	Frontal	Pars Opercularis	3	66044821	rs78683549	T	C	0.698	73883	7.139	9.374e-13	65777343	66321065	NO
Cortical surface area	Frontal	Pars Opercularis	3	147106319	rs2279829	T	C	0.2164	79436	7.539	4.725e-14	146844030	147517609	NO
Cortical surface area	Frontal	Pars Opercularis	3	177312876	rs4857716	T	C	0.5863	77145	-6.44	1.192e-10	177062876	177592468	NO
Cortical surface area	Frontal	Pars Opercularis	5	128733572	rs12656592	T	C	0.7122	77776	-7.688	1.489e-14	128483572	128989635	NO
Cortical surface area	Frontal	Pars Opercularis	5	128734008	rs12187568	C	G	0.9264	52948	13.738	6.008e-43	128484008	129304770	NO
Cortical surface area	Frontal	Pars Opercularis	5	129015452	rs30645	T	C	0.4516	79741	-6.308	2.832e-10	128608581	129352338	NO
Cortical surface area	Frontal	Pars Opercularis	5	129056053	rs246245	A	G	0.0765	80100	-8.356	6.487e-17	128626340	129595926	NO
Cortical surface area	Frontal	Pars Opercularis	6	92002913	rs9351259	A	G	0.1757	79694	-6.43	1.272e-10	91752569	92260010	NO
Cortical surface area	Frontal	Pars Opercularis	6	126070789	rs7764016	T	G	0.4767	79207	-9.295	1.468e-20	125674156	126465486	NO
Cortical surface area	Frontal	Pars Opercularis	8	71566308	rs34882924	T	C	0.4809	79450	-7.331	2.279e-13	71214551	72262331	YES
Cortical surface area	Frontal	Pars Opercularis	9	98264942	rs28427480	A	C	0.9036	79473	-6.521	6.987e-11	97960941	98610116	NO
Cortical surface area	Frontal	Pars Opercularis	9	126335818	rs76282124	T	C	0.8222	78655	-6.618	3.629e-11	126037416	126675818	NO
Cortical surface area	Frontal	Pars Opercularis	12	78324175	rs2086231	T	C	0.324	79483	6.396	1.6e-10	77991285	78637476	NO
Cortical surface area	Frontal	Pars Opercularis	15	39570229	rs55815708	A	G	0.4484	78888	-7.597	3.032e-14	39319085	39830180	NO
Cortical surface area	Frontal	Pars Opercularis	15	39633904	rs2033939	A	G	0.0816	79680	-16.455	7.718e-61	39303167	39919067	NO
Cortical surface area	Frontal	Pars Opercularis	15	39643642	rs34893836	A	G	0.5368	77780	-8.172	3.045e-16	39292919	39920175	NO
Cortical surface area	Frontal	Pars Opercularis	15	39774669	rs12899217	T	C	0.8769	79724	8.521	1.588e-17	39427303	40045475	NO
Cortical surface area	Frontal	Pars Opercularis	17	2115554	17:2115554_AAG_A	A	AAG	0.1402	78413	-6.332	2.417e-10	1690232	2480386	NO
Cortical surface area	Frontal	Pars Opercularis	17	13044303	rs9909179	T	C	0.5885	79354	8.704	3.203e-18	12781120	13349547	NO
Cortical surface area	Frontal	Pars Opercularis	17	60921149	rs9903891	A	T	0.3707	77053	-6.173	6.713e-10	60656349	61180216	NO
Cortical surface area	Frontal	Pars Opercularis	19	32207820	rs2043294	A	T	0.8198	76866	-7.343	2.089e-13	31928927	32465509	NO
Cortical surface area	Frontal	Pars Opercularis	20	15781434	rs4052905	T	C	0.6322	77560	6.395	1.601e-10	15518237	16051600	NO
Cortical surface area	Frontal	Pars Orbitalis	1	85842112	rs12139958	A	G	0.7938	79750	-7.239	4.519e-13	85525217	86189476	NO
Cortical surface area	Frontal	Pars Orbitalis	1	119762175	rs72691108	A	G	0.2464	79658	-11.031	2.701e-28	118789092	120039694	NO
Cortical surface area	Frontal	Pars Orbitalis	1	234726101	rs10910470	T	C	0.2129	79153	6.484	8.936e-11	234476101	235026092	YES
Cortical surface area	Frontal	Pars Orbitalis	2	6566657	rs2100632	T	C	0.0718	80156	-6.362	1.986e-10	6300266	6825663	YES
Cortical surface area	Frontal	Pars Orbitalis	2	18702074	rs7579323	A	G	0.5864	78357	-8.262	1.435e-16	18426265	18979244	NO
Cortical surface area	Frontal	Pars Orbitalis	2	65970437	rs7570841	A	G	0.386	79773	-10.33	5.135e-25	65687041	66256558	NO
Cortical surface area	Frontal	Pars Orbitalis	3	66042247	rs28848789	T	C	0.6971	74150	-6.797	1.065e-11	65776965	66322238	NO
Cortical surface area	Frontal	Pars Orbitalis	3	77187833	rs35709141	G	GT	0.5565	73229	7.24	4.5e-13	76924700	77522655	NO
Cortical surface area	Frontal	Pars Orbitalis	3	77341979	rs7430864	T	C	0.4145	55711	-9.138	6.385e-20	76965327	77659403	NO
Cortical surface area	Frontal	Pars Orbitalis	3	77438258	rs150725378	A	G	0.0746	79302	-6.46	1.045e-10	77188258	77733856	NO
Cortical surface area	Frontal	Pars Orbitalis	3	147081271	rs11718368	A	C	0.5329	78352	7.388	1.491e-13	146721879	147396606	NO
Cortical surface area	Frontal	Pars Orbitalis	3	147106319	rs2279829	T	C	0.2165	79549	12.959	2.076e-38	146832740	147608826	NO
Cortical surface area	Frontal	Pars Orbitalis	5	92635678	rs61341720	A	C	0.0851	41864	-6.526	6.757e-11	92385678	92885678	NO
Cortical surface area	Frontal	Pars Orbitalis	5	116658659	rs7727800	T	C	0.3261	79213	-6.191	5.997e-10	116296192	116914489	NO
Cortical surface area	Frontal	Pars Orbitalis	5	128734008	rs12187568	C	G	0.9264	52948	8.39	4.88e-17	128484008	128984008	NO
Cortical surface area	Frontal	Pars Orbitalis	5	171128464	rs6555969	T	C	0.3224	78332	6.165	7.031e-10	170878464	171416685	NO
Cortical surface area	Frontal	Pars Orbitalis	6	127081190	rs1343222	T	C	0.7649	79030	-8.572	1.018e-17	126363946	127527488	NO
Cortical surface area	Frontal	Pars Orbitalis	6	157321061	rs10485201	A	G	0.3301	79523	-7.049	1.799e-12	157016505	157652041	NO
Cortical surface area	Frontal	Pars Orbitalis	7	96215048	7:96215048_GCTGT_G	G	GCTGT	0.2847	54179	7.096	1.285e-12	95900233	96599297	NO
Cortical surface area	Frontal	Pars Orbitalis	10	21957229	rs2183271	T	C	0.6393	79854	7.454	9.054e-14	21384273	22538132	NO
Cortical surface area	Frontal	Pars Orbitalis	10	32268326	rs2995526	C	G	0.7018	79578	6.647	3.001e-11	31832658	32527479	NO
Cortical surface area	Frontal	Pars Orbitalis	11	92317858	rs1622987	A	G	0.331	78665	8.375	5.501e-17	91963728	92808342	NO
Cortical surface area	Frontal	Pars Orbitalis	11	92568908	rs12789841	A	G	0.6211	79463	6.314	2.725e-10	92318633	92873608	NO
Cortical surface area	Frontal	Pars Orbitalis	13	22190518	rs2798259	A	T	0.4335	55784	6.44	1.194e-10	21935794	22462771	NO
Cortical surface area	Frontal	Pars Orbitalis	13	81249861	rs36188842	T	G	0.2261	76810	7.828	4.958e-15	80910684	81908072	NO
Cortical surface area	Frontal	Pars Orbitalis	14	54777745	rs7147119	A	G	0.3665	79002	-7.265	3.741e-13	54216458	55043115	NO
Cortical surface area	Frontal	Pars Orbitalis	14	98392157	rs2776596	A	G	0.3443	78867	7.845	4.321e-15	98092603	98708725	NO
Cortical surface area	Frontal	Pars Orbitalis	15	37278187	rs940094	T	C	0.8693	79107	-7.23	4.822e-13	37025406	37531805	NO
Cortical surface area	Frontal	Pars Orbitalis	15	39640223	15:39640223_TTAAA_T	T	TTAAA	0.0908	73830	-6.324	2.553e-10	39381771	39914000	NO
Cortical surface area	Frontal	Pars Orbitalis	16	86706756	rs74035020	A	C	0.1657	79306	-6.457	1.07e-10	86436972	86964715	NO
Cortical surface area	Frontal	Pars Orbitalis	19	4372579	rs142891753	A	G	0.9828	56934	-6.369	1.902e-10	4111656	4681185	NO
Cortical surface area	Frontal	Pars Triangularis	1	17315425	rs4920605	A	G	0.5654	79375	-8.876	6.957e-19	16960774	17679185	NO
Cortical surface area	Frontal	Pars Triangularis	1	178733290	1:178733290_GGT_G	G	GGT	0.5777	78082	-6.294	3.1e-10	178483290	179158423	NO
Cortical surface area	Frontal	Pars Triangularis	2	16430349	rs72772496	T	C	0.9192	54419	7.511	5.848e-14	16175046	16758960	NO
Cortical surface area	Frontal	Pars Triangularis	2	48324044	rs6748469	A	G	0.5938	78927	-7.875	3.41e-15	47927487	48574044	NO
Cortical surface area	Frontal	Pars Triangularis	2	65987291	rs10168499	A	G	0.6129	79458	10.552	4.993e-26	65687041	66256558	NO
Cortical surface area	Frontal	Pars Triangularis	3	147106319	rs2279829	T	C	0.2166	79469	20.633	1.38e-94	146503091	147608826	NO
Cortical surface area	Frontal	Pars Triangularis	3	147121751	rs6766244	T	C	0.232	79774	-9.315	1.219e-20	146831271	147578212	NO
Cortical surface area	Frontal	Pars Triangularis	3	147210977	rs9841471	A	C	0.8382	79505	-7.736	1.028e-14	146923469	147551502	NO
Cortical surface area	Frontal	Pars Triangularis	3	147218844	3:147218844_CCAT_C	CCAT	C	0.9808	72173	-7.37	1.711e-13	146968844	147468844	NO
Cortical surface area	Frontal	Pars Triangularis	3	147355313	rs9968181	A	G	0.8023	79554	-7.239	4.52e-13	147079730	147605313	NO
Cortical surface area	Frontal	Pars Triangularis	3	177306621	rs4857612	C	G	0.3928	78405	-6.593	4.312e-11	177036455	177595126	NO
Cortical surface area	Frontal	Pars Triangularis	5	82844728	rs309596	T	C	0.2046	79703	6.6	4.11e-11	82573791	83103209	NO
Cortical surface area	Frontal	Pars Triangularis	5	92012438	rs972727	A	G	0.8544	79774	7.873	3.459e-15	91717289	92284663	NO
Cortical surface area	Frontal	Pars Triangularis	5	92198596	rs6870189	A	G	0.5975	79360	7.739	1.006e-14	91862616	92486773	NO
Cortical surface area	Frontal	Pars Triangularis	5	92635678	rs61341720	A	C	0.0851	41864	-9.084	1.047e-19	92385678	92885678	NO
Cortical surface area	Frontal	Pars Triangularis	5	93940742	5:93940742_AAC_A	A	AAC	0.2732	78546	7.387	1.503e-13	93597051	94336368	NO
Cortical surface area	Frontal	Pars Triangularis	5	128700484	rs56357735	A	G	0.3347	77133	-7.165	7.797e-13	128432818	128982347	NO
Cortical surface area	Frontal	Pars Triangularis	5	128733572	rs12656592	T	C	0.712	77806	-8.812	1.228e-18	128483572	128989635	NO
Cortical surface area	Frontal	Pars Triangularis	5	128734008	rs12187568	C	G	0.9264	52948	14.329	1.435e-46	128484008	129304770	NO
Cortical surface area	Frontal	Pars Triangularis	5	128972318	rs62399043	T	G	0.0714	79743	-7.573	3.639e-14	128626340	129596816	NO
Cortical surface area	Frontal	Pars Triangularis	5	129103254	rs1432718	A	T	0.3767	75256	-6.769	1.295e-11	128627617	129353254	NO
Cortical surface area	Frontal	Pars Triangularis	5	170811581	rs6555951	C	G	0.372	79571	6.553	5.629e-11	170528824	171098124	NO
Cortical surface area	Frontal	Pars Triangularis	6	31883679	rs9267673	T	C	0.0884	79513	-6.241	4.358e-10	31633679	32357161	NO
Cortical surface area	Frontal	Pars Triangularis	6	92002913	rs9351259	A	G	0.1756	79727	-7.295	2.981e-13	91692761	92263843	NO
Cortical surface area	Frontal	Pars Triangularis	6	126115821	rs9398791	T	C	0.481	77844	-6.792	1.109e-11	125790435	126366953	NO
Cortical surface area	Frontal	Pars Triangularis	6	127090469	rs4895815	A	G	0.7655	79505	-7.177	7.135e-13	126363946	127435801	NO
Cortical surface area	Frontal	Pars Triangularis	7	96115099	rs10281460	A	G	0.2328	77913	-7.964	1.665e-15	95827048	96365099	NO
Cortical surface area	Frontal	Pars Triangularis	7	96134016	rs62470045	A	G	0.9588	79557	-6.859	6.952e-12	95884016	96384016	NO
Cortical surface area	Frontal	Pars Triangularis	7	96168217	rs4577892	T	C	0.7363	79414	6.302	2.931e-10	95918217	96418217	NO
Cortical surface area	Frontal	Pars Triangularis	7	96170753	7:96170753_TTG_T	T	TTG	0.0683	43009	6.564	5.236e-11	95920753	96420753	NO
Cortical surface area	Frontal	Pars Triangularis	7	96188627	rs117187978	C	G	0.9754	79677	-6.43	1.28e-10	95872306	96620112	NO
Cortical surface area	Frontal	Pars Triangularis	7	96202718	rs10278627	A	G	0.6839	79728	-17.917	8.742e-72	95826343	96650976	NO
Cortical surface area	Frontal	Pars Triangularis	7	96363725	rs17497711	T	C	0.0387	79980	6.248	4.165e-10	95957098	96613725	NO
Cortical surface area	Frontal	Pars Triangularis	8	120613822	rs2289889	T	C	0.446	79734	-7.588	3.247e-14	119996904	120957435	NO
Cortical surface area	Frontal	Pars Triangularis	9	98270171	rs1355619	A	G	0.6727	77279	-6.361	2.009e-10	97979389	98528644	NO
Cortical surface area	Frontal	Pars Triangularis	10	32249573	rs72778402	T	C	0.2973	79597	-6.627	3.422e-11	31832658	32599238	NO
Cortical surface area	Frontal	Pars Triangularis	10	126844621	rs10901870	T	C	0.2499	78331	-7.518	5.567e-14	126592554	127128645	NO
Cortical surface area	Frontal	Pars Triangularis	10	127161020	rs10901381	A	G	0.4531	79137	-8.697	3.419e-18	126855839	127443462	NO
Cortical surface area	Frontal	Pars Triangularis	11	110961465	rs12419745	A	G	0.8267	79692	6.686	2.291e-11	110695055	111290690	NO
Cortical surface area	Frontal	Pars Triangularis	11	111025039	rs34077344	A	T	0.0476	79530	8.388	4.924e-17	110741189	111302312	NO
Cortical surface area	Frontal	Pars Triangularis	11	111072779	rs949279	A	G	0.3292	79149	9.682	3.598e-22	110695939	111346549	NO
Cortical surface area	Frontal	Pars Triangularis	11	120315034	11:120315034_CTATA_C	CTATA	C	0.9613	72395	6.714	1.896e-11	119902147	120590060	NO
Cortical surface area	Frontal	Pars Triangularis	12	106476805	rs12146713	T	C	0.9064	79774	7.309	2.701e-13	106193251	106760413	NO
Cortical surface area	Frontal	Pars Triangularis	13	81292393	rs9531107	A	G	0.2178	77402	8.277	1.267e-16	80887320	81812924	NO
Cortical surface area	Frontal	Pars Triangularis	14	58671059	rs1190824	A	G	0.3459	78781	6.552	5.665e-11	58418484	59103006	NO
Cortical surface area	Frontal	Pars Triangularis	14	59074136	rs160459	A	C	0.538	79774	6.579	4.739e-11	58456609	59324878	NO
Cortical surface area	Frontal	Pars Triangularis	14	59665286	rs1252992	A	G	0.4658	77947	6.217	5.072e-10	59386409	60004135	NO
Cortical surface area	Frontal	Pars Triangularis	14	104124791	rs8005885	A	T	0.3675	73617	-6.171	6.781e-10	103578399	104436876	NO
Cortical surface area	Frontal	Pars Triangularis	15	39634222	rs1080066	A	G	0.9099	79774	14.932	2.032e-50	39303167	39919067	NO
Cortical surface area	Frontal	Pars Triangularis	15	39643642	rs34893836	A	G	0.5368	77813	-6.75	1.483e-11	39297526	39912789	NO
Cortical surface area	Frontal	Pars Triangularis	15	55921993	15:55921993_CATGAATAT_C	CATGAATAT	C	0.7043	78964	6.94	3.929e-12	55631107	56300143	NO
Cortical surface area	Frontal	Pars Triangularis	16	86710660	rs10048146	A	G	0.8103	79774	7.346	2.046e-13	86424726	86964715	NO
Cortical surface area	Frontal	Pars Triangularis	16	87224293	rs12711473	A	G	0.3823	79017	-6.827	8.654e-12	86970845	87508929	NO
Cortical surface area	Frontal	Pars Triangularis	17	28296327	rs9897794	T	G	0.5183	79774	7.134	9.779e-13	27685546	28800732	NO
Cortical surface area	Frontal	Pars Triangularis	19	30852938	19:30852938_CTACTG_C	CTACTG	C	0.2415	79021	7.427	1.112e-13	30590250	31111683	NO
Cortical surface area	Frontal	Precentral	1	103353934	rs2615980	T	C	0.6803	77720	6.652	2.899e-11	102960619	103649207	NO
Cortical surface area	Frontal	Precentral	2	54615325	rs79272390	T	C	0.1563	76862	6.183	6.293e-10	54365325	54865325	NO
Cortical surface area	Frontal	Precentral	2	189888422	2:189888422_GATATATATATATAT_G	G	GATATATATATATAT	0.9662	51592	7.736	1.024e-14	189633644	190610239	NO
Cortical surface area	Frontal	Precentral	2	223072019	rs2855266	A	T	0.143	77655	7.078	1.461e-12	222740712	223352937	YES
Cortical surface area	Frontal	Precentral	3	73345519	rs62249762	A	G	0.4681	78253	6.477	9.339e-11	73073590	73595578	NO
Cortical surface area	Frontal	Precentral	4	19076272	4:19076272_AT_A	A	AT	0.3372	60361	-6.829	8.578e-12	18823685	19326272	NO
Cortical surface area	Frontal	Precentral	5	88019747	rs254780	C	G	0.5875	56802	-6.517	7.174e-11	87735295	88315637	NO
Cortical surface area	Frontal	Precentral	5	92001793	rs62368474	A	C	0.8289	78999	7.716	1.196e-14	91749005	92262438	NO
Cortical surface area	Frontal	Precentral	5	92018490	rs4869124	T	G	0.3264	78488	7.169	7.538e-13	91727934	92298984	NO
Cortical surface area	Frontal	Precentral	5	92058396	rs1429053	T	C	0.1655	76440	-6.23	4.672e-10	91808396	92317034	NO
Cortical surface area	Frontal	Precentral	5	92196315	rs111897684	A	G	0.0317	76516	-6.373	1.857e-10	91946315	92746735	NO
Cortical surface area	Frontal	Precentral	5	92211699	rs1363291	A	T	0.3781	78535	-7.02	2.222e-12	91840343	92463757	NO
Cortical surface area	Frontal	Precentral	5	92666034	rs5010132	T	C	0.7094	78740	-6.923	4.427e-12	92386386	92919631	NO
Cortical surface area	Frontal	Precentral	5	92950673	rs10064431	T	C	0.4805	78606	8.52	1.592e-17	92459893	93677260	NO
Cortical surface area	Frontal	Precentral	6	91933155	rs9353813	A	C	0.2534	79264	-7.019	2.233e-12	91635686	92185053	NO
Cortical surface area	Frontal	Precentral	6	92010010	rs2180127	T	C	0.8231	78959	13.478	2.103e-41	91620804	92266259	NO
Cortical surface area	Frontal	Precentral	6	127068983	rs853974	T	C	0.2637	78439	8.137	4.053e-16	126454795	127330700	NO
Cortical surface area	Frontal	Precentral	7	18915559	rs10237366	C	G	0.3803	78055	-6.378	1.79e-10	18631075	19183411	NO
Cortical surface area	Frontal	Precentral	7	114336114	rs12705982	T	C	0.4668	77862	-7.097	1.279e-12	113824257	114678727	NO
Cortical surface area	Frontal	Precentral	9	126862735	rs7868648	T	G	0.228	78484	7.693	1.439e-14	126586526	127114242	NO
Cortical surface area	Frontal	Precentral	10	50382273	rs72789089	T	C	0.7501	77965	-6.802	1.033e-11	49961745	50672795	NO
Cortical surface area	Frontal	Precentral	10	72435363	rs7895280	T	G	0.7466	78573	6.546	5.912e-11	72116095	72708091	NO
Cortical surface area	Frontal	Precentral	10	118696266	rs4751614	A	T	0.7653	78654	8.748	2.168e-18	118356810	119146767	NO
Cortical surface area	Frontal	Precentral	11	12072213	rs11022131	C	G	0.7514	75610	-6.285	3.277e-10	11821436	12322400	NO
Cortical surface area	Frontal	Precentral	11	92460611	rs34774306	T	TA	0.6749	78712	-6.303	2.915e-10	92067858	92760897	NO
Cortical surface area	Frontal	Precentral	11	114072659	rs61904685	A	G	0.1644	78362	6.309	2.803e-10	113801904	114331271	NO
Cortical surface area	Frontal	Precentral	13	46404955	rs4942447	A	G	0.3948	78369	6.566	5.159e-11	46130938	46669918	YES
Cortical surface area	Frontal	Precentral	13	81298245	rs9545540	C	G	0.2144	77140	6.831	8.455e-12	80951474	81881782	NO
Cortical surface area	Frontal	Precentral	14	59628679	rs76341705	A	G	0.125	79129	-7.386	1.519e-13	59355116	60081428	NO
Cortical surface area	Frontal	Precentral	14	69019538	rs17756000	T	C	0.2482	78948	-6.401	1.546e-10	68738664	69287320	NO
Cortical surface area	Frontal	Precentral	15	39092485	15:39092485_AG_A	A	AG	0.3148	78050	13.109	2.919e-39	38797766	39362034	NO
Cortical surface area	Frontal	Precentral	15	39334237	rs1350747	T	C	0.5264	74906	-9.019	1.903e-19	39075617	39606141	NO
Cortical surface area	Frontal	Precentral	15	39341889	rs78379000	C	G	0.9802	56984	-8.271	1.324e-16	39084193	39759914	NO
Cortical surface area	Frontal	Precentral	15	39519925	rs156795	A	G	0.4763	72259	11.717	1.04e-31	39101937	39769925	NO
Cortical surface area	Frontal	Precentral	15	39521720	rs8036333	A	G	0.2337	78354	7.001	2.54e-12	39271720	39777948	NO
Cortical surface area	Frontal	Precentral	15	39553621	rs11387498	A	AG	0.2076	78166	15.147	7.904e-52	39282647	39830180	NO
Cortical surface area	Frontal	Precentral	15	39555439	rs150806835	T	C	0.0073	71009	6.345	2.219e-10	39305439	39805439	NO
Cortical surface area	Frontal	Precentral	15	39569843	rs71896388	T	TA	0.3904	28470	6.492	8.465e-11	39319843	39819843	NO
Cortical surface area	Frontal	Precentral	15	39576705	rs7178689	T	C	0.9869	56368	-6.811	9.712e-12	39326705	39826705	NO
Cortical surface area	Frontal	Precentral	15	39593159	rs16968711	A	G	0.8688	78756	10.542	5.552e-26	39081120	39889633	NO
Cortical surface area	Frontal	Precentral	15	39593893	rs374154454	G	GAGT	0.9912	56833	-12.606	1.951e-36	39291864	40236522	NO
Cortical surface area	Frontal	Precentral	15	39598407	rs141038481	T	C	0.9925	69405	-8.813	1.219e-18	39345301	39848407	NO
Cortical surface area	Frontal	Precentral	15	39625991	rs11070186	C	G	0.4606	30349	-6.278	3.433e-10	39375991	39875991	NO
Cortical surface area	Frontal	Precentral	15	39629777	rs62002319	T	C	0.9793	71706	-11.027	2.84e-28	39379777	39879777	NO
Cortical surface area	Frontal	Precentral	15	39631250	rs74963908	A	G	0.0086	71048	6.454	1.093e-10	39381119	39893175	NO
Cortical surface area	Frontal	Precentral	15	39631771	rs11639391	T	C	0.0895	79235	47.177	8.70e-486	39284404	39919067	NO
Cortical surface area	Frontal	Precentral	15	39640301	rs148182077	T	C	0.007	62426	13.613	3.334e-42	39300929	39912740	NO
Cortical surface area	Frontal	Precentral	15	39647036	rs62002336	T	C	0.4592	77359	-17.885	1.53e-71	39282831	39920175	NO
Cortical surface area	Frontal	Precentral	15	39662900	rs62002339	T	C	0.0062	52146	11.754	6.723e-32	39196757	40194785	NO
Cortical surface area	Frontal	Precentral	15	39665537	rs145370012	A	G	0.0058	56848	10.558	4.689e-26	39415537	40256687	NO
Cortical surface area	Frontal	Precentral	15	39671514	rs11070197	T	C	0.759	73312	-9.153	5.546e-20	39421514	39921514	NO
Cortical surface area	Frontal	Precentral	15	39698737	rs12148895	A	G	0.7897	78650	7.187	6.601e-13	39432222	39979202	NO
Cortical surface area	Frontal	Precentral	15	39702365	rs564846537	A	C	0.0052	51298	6.82	9.081e-12	39452365	40108743	NO
Cortical surface area	Frontal	Precentral	15	39726098	rs181104009	T	C	0.9921	56260	6.427	1.298e-10	39476098	39976098	NO
Cortical surface area	Frontal	Precentral	15	39742570	rs62005276	T	C	0.1349	79520	13.254	4.303e-40	39422231	40196562	NO
Cortical surface area	Frontal	Precentral	15	39809640	rs115241741	A	C	0.0471	73952	-10.581	3.665e-26	39452040	40273237	NO
Cortical surface area	Frontal	Precentral	15	39824135	rs11855817	T	C	0.557	78875	7.384	1.533e-13	39436948	40266455	NO
Cortical surface area	Frontal	Precentral	15	39900108	rs117706231	A	G	0.9908	67938	-7.361	1.828e-13	39596754	40150108	NO
Cortical surface area	Frontal	Precentral	15	40017333	rs11070230	A	G	0.0313	75692	6.588	4.456e-11	39626901	40365767	NO
Cortical surface area	Frontal	Precentral	15	40142181	15:40142181_GA_G	G	GA	0.9857	76807	-8.164	3.254e-16	39869703	40489035	NO
Cortical surface area	Frontal	Precentral	15	40204773	rs117310215	T	C	0.0458	77663	7.583	3.379e-14	39930934	40454773	NO
Cortical surface area	Frontal	Precentral	15	55965521	rs28556884	T	C	0.7442	78757	7.696	1.407e-14	55677100	56288707	NO
Cortical surface area	Frontal	Precentral	15	99191051	rs35554027	C	G	0.5665	56492	6.951	3.636e-12	98924828	99457392	YES
Cortical surface area	Frontal	Precentral	17	28511978	rs1979572	A	G	0.45	79319	9.095	9.437e-20	27662010	29120727	NO
Cortical surface area	Frontal	Rostral Anterior Cingulate	1	47974123	rs61784835	T	C	0.3609	78811	-9.537	1.472e-21	47668842	48251930	NO
Cortical surface area	Frontal	Rostral Anterior Cingulate	2	37102249	rs17496249	A	G	0.5532	78639	6.992	2.719e-12	36799563	37442495	NO
Cortical surface area	Frontal	Rostral Anterior Cingulate	2	65984026	rs7600385	A	T	0.3847	79473	6.557	5.495e-11	65687041	66249623	NO
Cortical surface area	Frontal	Rostral Anterior Cingulate	4	19073685	rs12508031	A	T	0.6586	63906	7.687	1.503e-14	18823685	19326272	NO
Cortical surface area	Frontal	Rostral Anterior Cingulate	6	126090277	rs1159974	T	C	0.4777	79413	-6.324	2.541e-10	125802359	126366953	NO
Cortical surface area	Frontal	Rostral Anterior Cingulate	6	126851160	rs1490384	T	C	0.5019	79413	8.026	1.009e-15	126409043	127368646	NO
Cortical surface area	Frontal	Rostral Anterior Cingulate	7	18737866	rs1178102	T	C	0.1719	79331	7.935	2.098e-15	18484921	19004123	NO
Cortical surface area	Frontal	Rostral Anterior Cingulate	12	65905126	rs79487293	T	C	0.3206	78666	-7.918	2.408e-15	65468299	66155126	NO
Cortical surface area	Frontal	Rostral Anterior Cingulate	12	85621934	rs12827555	A	G	0.1871	79623	6.969	3.186e-12	85326492	86007448	NO
Cortical surface area	Frontal	Rostral Anterior Cingulate	15	55980599	rs141113881	T	TTA	0.7418	73251	-7.415	1.213e-13	55631107	56233271	NO
Cortical surface area	Frontal	Rostral Anterior Cingulate	16	51482321	rs1345467	A	G	0.7284	78587	-7.147	8.848e-13	51205794	51745068	NO
Cortical surface area	Frontal	Rostral Anterior Cingulate	17	40686342	rs4793090	A	G	0.6589	78987	6.446	1.148e-10	40321284	41074834	NO
Cortical surface area	Frontal	Rostral Anterior Cingulate	17	47089908	rs35051752	A	G	0.3555	79436	7.246	4.306e-13	46805622	47400604	NO
Cortical surface area	Frontal	Rostral Anterior Cingulate	17	47328183	rs28397663	T	C	0.3722	79161	6.556	5.544e-11	47070938	47704515	NO
Cortical surface area	Frontal	Rostral Middle Frontal	1	119799080	rs7529537	T	C	0.8799	79041	8.732	2.494e-18	119545854	120082202	NO
Cortical surface area	Frontal	Rostral Middle Frontal	1	205789282	rs823080	A	G	0.4105	79178	7.171	7.435e-13	205419322	206062614	NO
Cortical surface area	Frontal	Rostral Middle Frontal	2	188379320	rs35612915	A	G	0.2458	77669	-7.597	3.026e-14	187825497	188724978	NO
Cortical surface area	Frontal	Rostral Middle Frontal	3	147106319	rs2279829	T	C	0.2163	79437	8.806	1.301e-18	146845294	147518599	NO
Cortical surface area	Frontal	Rostral Middle Frontal	3	147891874	rs77640487	T	C	0.0551	74952	-7.254	4.035e-13	147551312	148141874	NO
Cortical surface area	Frontal	Rostral Middle Frontal	3	193549408	rs1146045	T	C	0.593	78350	7.187	6.63e-13	193256275	193834021	NO
Cortical surface area	Frontal	Rostral Middle Frontal	4	128200281	rs9999648	A	C	0.5922	79031	6.352	2.131e-10	127744423	128504984	NO
Cortical surface area	Frontal	Rostral Middle Frontal	5	92186059	rs888812	T	C	0.5086	79671	6.545	5.938e-11	91884273	92463757	NO
Cortical surface area	Frontal	Rostral Middle Frontal	5	92635678	rs61341720	A	C	0.0851	41864	-6.279	3.4e-10	92385678	92885678	NO
Cortical surface area	Frontal	Rostral Middle Frontal	5	128733572	rs12656592	T	C	0.7121	77777	6.743	1.548e-11	128483572	128983995	NO
Cortical surface area	Frontal	Rostral Middle Frontal	5	128734008	rs12187568	C	G	0.9263	52948	-9.306	1.332e-20	128484008	129172574	NO
Cortical surface area	Frontal	Rostral Middle Frontal	5	128949622	rs6895411	A	C	0.7894	79691	-6.268	3.651e-10	128631161	129286304	NO
Cortical surface area	Frontal	Rostral Middle Frontal	5	170805250	rs6555949	C	G	0.3729	77145	7.625	2.441e-14	170528824	171098124	NO
Cortical surface area	Frontal	Rostral Middle Frontal	6	126851160	rs1490384	T	C	0.5019	79477	8.207	2.26e-16	126409043	127330700	NO
Cortical surface area	Frontal	Rostral Middle Frontal	6	138869766	rs9402980	C	G	0.2835	79001	-6.212	5.236e-10	138612574	139123329	NO
Cortical surface area	Frontal	Rostral Middle Frontal	7	18658271	rs2695023	A	T	0.3454	78969	8.007	1.178e-15	18359060	18926499	NO
Cortical surface area	Frontal	Rostral Middle Frontal	7	43027660	rs10264709	C	G	0.22	79034	-9.799	1.134e-22	42729487	43392622	NO
Cortical surface area	Frontal	Rostral Middle Frontal	8	21902242	rs1484163	C	G	0.7305	65007	-6.243	4.289e-10	21652242	22156403	NO
Cortical surface area	Frontal	Rostral Middle Frontal	8	28450639	rs201247438	CT	C	0.7047	48794	6.313	2.731e-10	28192723	28701539	NO
Cortical surface area	Frontal	Rostral Middle Frontal	8	120596023	rs10283100	A	G	0.0557	72677	8.252	1.557e-16	120346023	120917078	NO
Cortical surface area	Frontal	Rostral Middle Frontal	8	120693552	rs2326308	T	C	0.6261	79693	6.962	3.344e-12	120331643	120957435	NO
Cortical surface area	Frontal	Rostral Middle Frontal	8	129950844	rs7017252	T	C	0.3827	79119	6.734	1.655e-11	129590739	130244834	NO
Cortical surface area	Frontal	Rostral Middle Frontal	10	72440653	rs72814517	T	C	0.2373	78992	-6.164	7.104e-10	72163239	72710799	NO
Cortical surface area	Frontal	Rostral Middle Frontal	11	65473798	rs10750766	A	C	0.7084	79446	7.338	2.16e-13	65115077	65812257	NO
Cortical surface area	Frontal	Rostral Middle Frontal	11	92495524	rs3912653	A	G	0.3304	79575	6.298	3.01e-10	92067858	92808342	NO
Cortical surface area	Frontal	Rostral Middle Frontal	12	43610027	rs2407283	T	C	0.2653	79143	6.446	1.151e-10	43336429	44117783	NO
Cortical surface area	Frontal	Rostral Middle Frontal	12	79967201	rs67082199	A	AT	0.2997	51540	-6.191	5.977e-10	79675802	80283613	NO
Cortical surface area	Frontal	Rostral Middle Frontal	13	80607516	rs55743972	A	G	0.7232	78065	6.402	1.534e-10	80356751	80868435	NO
Cortical surface area	Frontal	Rostral Middle Frontal	13	81291962	rs1361580	C	G	0.2095	77508	6.976	3.036e-12	80954099	81881782	NO
Cortical surface area	Frontal	Rostral Middle Frontal	13	81499372	rs2503378	T	C	0.7953	79362	6.211	5.269e-10	80994085	81770548	NO
Cortical surface area	Frontal	Rostral Middle Frontal	13	100963980	rs9557415	T	C	0.4059	79611	-7.314	2.588e-13	100400513	101362917	NO
Cortical surface area	Frontal	Rostral Middle Frontal	14	58564871	rs10134917	T	C	0.5283	78313	6.933	4.115e-12	58295107	58827321	NO
Cortical surface area	Frontal	Rostral Middle Frontal	14	85745964	rs11847747	T	C	0.3833	76322	-6.896	5.335e-12	85449685	85996316	NO
Cortical surface area	Frontal	Rostral Middle Frontal	14	98398302	rs2809110	A	G	0.6441	78592	-7.823	5.163e-15	98092676	98748951	NO
Cortical surface area	Frontal	Rostral Middle Frontal	14	99683755	rs10527654	A	G	0.4375	73658	6.194	5.863e-10	99417179	99950080	NO
Cortical surface area	Frontal	Rostral Middle Frontal	15	39640223	15:39640223_TTAAA_T	T	TTAAA	0.0908	73721	-11.899	1.2e-32	39345840	39914000	NO
Cortical surface area	Frontal	Rostral Middle Frontal	17	1995135	rs796340111	T	TG	0.5857	74065	6.717	1.85e-11	1695621	2258278	NO
Cortical surface area	Frontal	Superior Frontal	1	33203717	rs656570	T	C	0.4116	67051	-6.264	3.759e-10	32945429	33465380	YES
Cortical surface area	Frontal	Superior Frontal	1	64212625	rs2819184	T	C	0.1616	79386	9.921	3.371e-23	63918755	64507297	NO
Cortical surface area	Frontal	Superior Frontal	1	85885836	rs1608536	T	C	0.2071	79369	-9.928	3.156e-23	85470007	86190157	NO
Cortical surface area	Frontal	Superior Frontal	2	60648780	rs12991515	A	G	0.4181	79312	7.874	3.442e-15	60338472	60976427	NO
Cortical surface area	Frontal	Superior Frontal	2	65984026	rs7600385	A	T	0.385	79253	6.425	1.319e-10	65695432	66249623	NO
Cortical surface area	Frontal	Superior Frontal	3	57186580	rs17235841	A	C	0.7889	79459	6.867	6.542e-12	56936580	57436580	NO
Cortical surface area	Frontal	Superior Frontal	3	124882267	rs816328	T	C	0.7528	77843	-8.643	5.47e-18	124611442	125153881	NO
Cortical surface area	Frontal	Superior Frontal	4	145293039	rs970022	T	C	0.594	78892	-6.73	1.696e-11	144977879	145698553	NO
Cortical surface area	Frontal	Superior Frontal	5	82835545	rs160279	A	G	0.5132	79455	6.415	1.405e-10	82576702	83103209	NO
Cortical surface area	Frontal	Superior Frontal	5	92008483	rs62368476	A	G	0.8547	79437	7.932	2.161e-15	91746073	92521164	NO
Cortical surface area	Frontal	Superior Frontal	5	92034730	rs10043042	T	C	0.333	79085	7.287	3.172e-13	91727934	92298984	NO
Cortical surface area	Frontal	Superior Frontal	5	92180071	rs17082633	T	C	0.0667	78417	-6.994	2.665e-12	91930071	92446315	NO
Cortical surface area	Frontal	Superior Frontal	5	92187893	rs17669307	T	C	0.8912	78922	-7.491	6.827e-14	91863793	92437893	NO
Cortical surface area	Frontal	Superior Frontal	5	92187932	rs17669337	T	C	0.4115	79459	-12.134	6.971e-34	91827131	92463757	NO
Cortical surface area	Frontal	Superior Frontal	5	92251840	rs67632512	A	C	0.1167	77992	7.465	8.326e-14	91954477	92618005	NO
Cortical surface area	Frontal	Superior Frontal	5	92603187	rs114829743	T	G	0.0241	73933	-6.29	3.173e-10	91820342	92853187	NO
Cortical surface area	Frontal	Superior Frontal	5	92635678	rs61341720	A	C	0.0851	41864	-10.05	9.209e-24	92385678	92885678	NO
Cortical surface area	Frontal	Superior Frontal	5	92636386	rs13166639	T	C	0.6405	58375	-6.675	2.478e-11	92386386	92923526	NO
Cortical surface area	Frontal	Superior Frontal	5	128734008	rs12187568	C	G	0.9264	52948	-7.854	4.037e-15	128484008	129304770	NO
Cortical surface area	Frontal	Superior Frontal	5	129045350	rs10655663	T	TAACA	0.0768	56998	6.773	1.258e-11	128630420	129355585	NO
Cortical surface area	Frontal	Superior Frontal	6	126068914	rs1935983	T	C	0.6089	79107	-7.408	1.278e-13	125772383	126372280	NO
Cortical surface area	Frontal	Superior Frontal	6	126851160	rs1490384	T	C	0.5022	79192	9.05	1.435e-19	126409043	127501021	NO
Cortical surface area	Frontal	Superior Frontal	7	92662327	rs12534506	A	T	0.5035	52815	-7.547	4.439e-14	92397232	92931443	NO
Cortical surface area	Frontal	Superior Frontal	8	22050440	rs34751594	A	C	0.8823	73577	6.549	5.773e-11	21782213	22311952	NO
Cortical surface area	Frontal	Superior Frontal	9	83458464	rs10867626	C	G	0.1644	78464	-6.865	6.65e-12	83208464	84017612	NO
Cortical surface area	Frontal	Superior Frontal	9	97681711	rs117758620	T	G	0.0694	79726	6.331	2.441e-10	97389463	98367968	NO
Cortical surface area	Frontal	Superior Frontal	9	98279370	rs28704635	A	T	0.2395	78492	9.825	8.757e-23	97897278	98558908	NO
Cortical surface area	Frontal	Superior Frontal	10	102194278	rs12571552	T	C	0.2859	71475	6.613	3.765e-11	101925134	102607780	NO
Cortical surface area	Frontal	Superior Frontal	10	102245664	rs149658356	T	C	0.9814	56526	-8.242	1.7e-16	101995664	102626017	NO
Cortical surface area	Frontal	Superior Frontal	10	104287051	rs1967815	A	G	0.279	78650	6.344	2.241e-10	103984781	104792745	NO
Cortical surface area	Frontal	Superior Frontal	11	31523130	rs1223114	A	G	0.3887	79189	6.959	3.433e-12	30887789	32050874	NO
Cortical surface area	Frontal	Superior Frontal	11	114051904	rs2073848	T	C	0.843	78190	-7.019	2.231e-12	113785516	114332690	NO
Cortical surface area	Frontal	Superior Frontal	11	114082956	rs491823	A	C	0.7739	77150	6.686	2.289e-11	113832956	114360253	NO
Cortical surface area	Frontal	Superior Frontal	11	114101839	rs370238	T	C	0.3575	78042	-6.326	2.508e-10	113844383	114353913	NO
Cortical surface area	Frontal	Superior Frontal	12	28297881	rs147450915	CT	C	0.3201	76478	-8.752	2.088e-18	27985596	28990649	NO
Cortical surface area	Frontal	Superior Frontal	12	79974565	rs4842316	T	C	0.6881	78663	-11.486	1.547e-30	79510388	80364680	NO
Cortical surface area	Frontal	Superior Frontal	13	80215498	rs9574448	A	G	0.2538	79459	8.427	3.541e-17	79919004	80501200	NO
Cortical surface area	Frontal	Superior Frontal	13	80616487	rs9318665	A	T	0.5498	56639	-6.492	8.452e-11	80355535	80869243	NO
Cortical surface area	Frontal	Superior Frontal	13	81249861	rs36188842	T	G	0.2262	76419	7.43	1.085e-13	80917981	81812924	NO
Cortical surface area	Frontal	Superior Frontal	14	31361742	rs10148294	A	T	0.5505	77807	6.784	1.172e-11	31111310	31755048	NO
Cortical surface area	Frontal	Superior Frontal	14	59628609	rs74826997	T	C	0.875	79328	7.48	7.428e-14	59335670	59919948	NO
Cortical surface area	Frontal	Superior Frontal	15	39085486	rs2912396	C	G	0.3986	56701	8.583	9.269e-18	38799090	39362034	NO
Cortical surface area	Frontal	Superior Frontal	15	39377157	rs5812079	G	GA	0.4544	49439	-6.993	2.686e-12	39105716	39632087	NO
Cortical surface area	Frontal	Superior Frontal	15	39633904	rs2033939	A	G	0.0816	79398	6.393	1.63e-10	39381771	39889992	NO
Cortical surface area	Frontal	Superior Frontal	15	55968539	rs12373006	A	G	0.2454	79099	-6.506	7.739e-11	55631659	56278308	NO
Cortical surface area	Frontal	Superior Frontal	15	71571345	rs7174934	A	G	0.4109	78598	6.73	1.7e-11	71307947	71856121	NO
Cortical surface area	Frontal	Superior Frontal	15	71628347	rs1473607	A	G	0.171	74657	-7.706	1.303e-14	71329529	71939202	NO
Cortical surface area	Frontal	Superior Frontal	15	75429721	rs62027287	A	C	0.28	78268	6.348	2.18e-10	74802927	75698813	NO
Cortical surface area	Frontal	Superior Frontal	17	30185565	rs9906443	A	G	0.85	79458	7.016	2.283e-12	29897884	30819359	YES
Cortical surface area	Frontal	Superior Frontal	17	44863413	rs199500	T	C	0.2743	77077	6.739	1.592e-11	43245420	45115603	NO
Cortical surface area	Frontal	Superior Frontal	17	65962238	rs10445361	T	G	0.7933	79172	6.983	2.895e-12	65563222	66251130	NO
Cortical surface area	Frontal	Superior Frontal	19	12876964	rs897804	C	G	0.4048	73027	-6.888	5.656e-12	12524862	13274250	NO
Cortical surface area	Frontal	Superior Frontal	20	3786637	rs8156	C	G	0.1007	78438	6.2	5.645e-10	3535397	4077288	YES
Cortical surface area	Frontal	Superior Frontal	21	46830393	rs914226	C	G	0.7695	75929	-6.413	1.431e-10	46575723	47088703	NO
Cortical surface area	Global	Total	1	2993807	rs2981888	C	G	0.307	76507	-7.929	2.207e-15	2686386	3246556	NO
Cortical surface area	Global	Total	1	9744244	rs4488033	T	C	0.4944	77474	-6.814	9.477e-12	9460559	10002648	YES
Cortical surface area	Global	Total	1	22435723	rs2092322	C	G	0.5345	56894	-6.596	4.236e-11	22103327	22725649	NO
Cortical surface area	Global	Total	1	50977279	rs12121630	A	G	0.1559	79095	-6.467	9.973e-11	50576176	51535475	NO
Cortical surface area	Global	Total	1	51188116	rs61781033	T	C	0.9637	71008	-6.499	8.086e-11	50569809	52016490	NO
Cortical surface area	Global	Total	1	61491266	rs77205085	T	C	0.9587	79688	-6.472	9.696e-11	61226196	61888521	NO
Cortical surface area	Global	Total	1	68627943	rs1808596	T	C	0.0978	78625	6.233	4.576e-10	68331947	68877943	NO
Cortical surface area	Global	Total	1	154204813	rs7542975	A	G	0.5247	53609	7.141	9.267e-13	153571944	154508549	NO
Cortical surface area	Global	Total	1	210557309	rs2884218	T	C	0.6988	78752	6.756	1.416e-11	210307308	210830381	YES
Cortical surface area	Global	Total	1	220472001	rs925446	A	G	0.4648	79206	-6.414	1.413e-10	220151009	220774444	NO
Cortical surface area	Global	Total	1	243662027	rs9428576	T	C	0.5654	78729	-7.498	6.476e-14	243391247	244264490	NO
Cortical surface area	Global	Total	1	243809488	rs115754292	T	C	0.0696	79087	6.305	2.873e-10	243559488	244273403	NO
Cortical surface area	Global	Total	2	48277490	rs7601767	A	G	0.3784	79039	-7.073	1.518e-12	47962055	48979851	NO
Cortical surface area	Global	Total	2	60509080	rs1553933	T	C	0.5848	78919	-7.757	8.671e-15	60155491	60781740	NO
Cortical surface area	Global	Total	2	61482261	rs10496091	A	G	0.279	79279	-9.478	2.586e-21	60887506	62086773	NO
Cortical surface area	Global	Total	2	85531116	rs41288837	T	C	0.0276	77979	-6.799	1.051e-11	85281116	85920863	NO
Cortical surface area	Global	Total	2	85572223	rs3755019	A	T	0.4395	78130	-7.764	8.211e-15	85277586	85909527	NO
Cortical surface area	Global	Total	2	183728290	rs7607737	T	C	0.1208	77781	6.511	7.49e-11	183441020	184164247	NO
Cortical surface area	Global	Total	2	198355135	rs148517124	T	TTG	0.327	52025	6.889	5.626e-12	197937903	199190251	NO
Cortical surface area	Global	Total	2	202936631	rs55806535	T	C	0.8232	77818	-6.241	4.349e-10	202663108	203196301	YES
Cortical surface area	Global	Total	3	28007738	rs7631437	T	C	0.5192	78910	7.199	6.055e-13	27728145	28271697	NO
Cortical surface area	Global	Total	3	28040643	rs73055580	T	G	0.1381	76788	7.707	1.292e-14	27729804	28290643	NO
Cortical surface area	Global	Total	3	41305087	rs35119938	T	TA	0.5452	73077	-6.573	4.93e-11	40972586	41558348	YES
Cortical surface area	Global	Total	3	49189030	3:49189030_GA_G	G	GA	0.6692	56929	6.82	9.094e-12	48469638	49835243	NO
Cortical surface area	Global	Total	3	49830032	rs61745903	T	C	0.0599	77393	6.45	1.119e-10	49175004	50352446	NO
Cortical surface area	Global	Total	3	69791738	rs9869047	A	G	0.2321	79279	6.648	2.97e-11	69541356	70184529	NO
Cortical surface area	Global	Total	3	127352970	rs114895876	A	G	0.9862	74537	6.503	7.886e-11	127102970	127602970	YES
Cortical surface area	Global	Total	3	135934711	rs28631273	A	G	0.2704	79071	-7.468	8.15e-14	135375498	136906593	NO
Cortical surface area	Global	Total	3	141093285	rs7624084	T	C	0.5566	78725	-6.654	2.851e-11	140837623	141404542	NO
Cortical surface area	Global	Total	3	141708171	rs3811708	T	G	0.1502	78779	12.727	4.165e-37	141316088	142125669	NO
Cortical surface area	Global	Total	3	142030227	3:142030227_GAA_G	G	GAA	0.1335	78273	7.288	3.156e-13	141695529	142792244	NO
Cortical surface area	Global	Total	4	17924734	rs11938781	T	C	0.8362	78741	7.429	1.092e-13	17535322	18285250	NO
Cortical surface area	Global	Total	4	103385407	rs13107511	T	C	0.9159	74104	-7.238	4.552e-13	102862470	103637094	NO
Cortical surface area	Global	Total	4	106009763	rs2301718	A	G	0.218	77949	8.327	8.298e-17	105759763	106637136	NO
Cortical surface area	Global	Total	4	139995689	rs62320530	C	G	0.6941	78624	-7.6	2.972e-14	139677130	140431329	NO
Cortical surface area	Global	Total	5	81093537	rs462122	A	G	0.2926	78538	6.698	2.115e-11	80828446	81423265	YES
Cortical surface area	Global	Total	5	112058410	rs6898133	C	G	0.4804	56600	7.013	2.328e-12	111738946	112551096	NO
Cortical surface area	Global	Total	5	170778824	rs7715167	T	C	0.3882	79171	-9.92	3.408e-23	170526747	171098124	NO
Cortical surface area	Global	Total	6	31325881	rs9266256	A	G	0.5146	56091	6.525	6.812e-11	31073039	32244782	NO
Cortical surface area	Global	Total	6	31346166	rs9266618	A	C	0.9022	54485	-8.4	4.454e-17	29777860	32931676	NO
Cortical surface area	Global	Total	6	32570839	rs9270856	A	G	0.281	67502	7.007	2.437e-12	32258306	32861590	NO
Cortical surface area	Global	Total	6	108926496	rs2802295	A	G	0.3762	78954	-9.031	1.7e-19	108607876	109270332	NO
Cortical surface area	Global	Total	6	126290265	rs62426379	A	G	0.5535	78279	-10.118	4.584e-24	126011593	126720887	NO
Cortical surface area	Global	Total	6	126450468	rs9401863	A	G	0.791	78184	7.427	1.113e-13	126200468	126720487	NO
Cortical surface area	Global	Total	6	126623120	rs9401873	T	C	0.6525	77230	-8.731	2.527e-18	126358815	126873120	NO
Cortical surface area	Global	Total	6	126792095	rs11759026	A	G	0.7666	78601	-17.288	5.778e-67	126373947	127619885	NO
Cortical surface area	Global	Total	6	127037042	rs10484759	T	C	0.2509	78616	-10.528	6.43e-26	126575446	127417072	NO
Cortical surface area	Global	Total	6	127090025	rs76611955	A	T	0.9603	74063	11.041	2.419e-28	125963598	128099292	NO
Cortical surface area	Global	Total	6	127166243	rs72976788	A	G	0.0489	75024	6.298	3.01e-10	126916243	127452364	NO
Cortical surface area	Global	Total	6	127175367	rs12198009	T	G	0.1072	77520	7.608	2.788e-14	126925367	127628777	NO
Cortical surface area	Global	Total	7	8109522	rs4725065	A	G	0.4886	78859	-6.608	3.908e-11	7764957	8382252	YES
Cortical surface area	Global	Total	7	20373632	rs17364645	A	G	0.31	79279	-6.56	5.373e-11	20122191	20711576	NO
Cortical surface area	Global	Total	7	23508740	7:23508740_AATTG_A	A	AATTG	0.2542	78302	-6.27	3.615e-10	23229013	23859295	YES
Cortical surface area	Global	Total	7	32953295	rs3956705	T	C	0.3776	78803	-6.978	2.994e-12	32609754	33249810	NO
Cortical surface area	Global	Total	7	50750128	rs2715135	T	G	0.3591	78878	7.914	2.501e-15	50446201	51126139	YES
Cortical surface area	Global	Total	7	54941328	rs76928645	T	C	0.1059	78539	11.062	1.918e-28	54659928	55400822	NO
Cortical surface area	Global	Total	7	55295275	rs4606015	T	C	0.0619	79198	-6.471	9.705e-11	55042028	55562527	NO
Cortical surface area	Global	Total	7	92239144	rs42034	A	G	0.7558	78824	7.88	3.287e-15	91973518	92577026	NO
Cortical surface area	Global	Total	7	98976430	rs10277149	T	C	0.8943	74129	6.731	1.683e-11	98641155	99516318	NO
Cortical surface area	Global	Total	7	104845094	rs41562	T	C	0.6557	79063	-6.715	1.875e-11	104350854	105313372	NO
Cortical surface area	Global	Total	7	139252780	rs1638195	T	C	0.3537	62587	-6.9	5.206e-12	139002780	139502780	NO
Cortical surface area	Global	Total	7	155772027	rs77324770	T	C	0.0696	56710	-6.421	1.354e-10	155522027	156028152	NO
Cortical surface area	Global	Total	7	156005079	rs7797990	A	G	0.6243	78885	-7.7	1.358e-14	155742928	156272994	NO
Cortical surface area	Global	Total	7	156015750	rs6460007	A	G	0.8648	79045	6.847	7.554e-12	155741809	156270025	NO
Cortical surface area	Global	Total	7	156056343	rs12386611	A	G	0.4904	78412	-7.19	6.503e-13	155793964	156313460	NO
Cortical surface area	Global	Total	7	156182533	rs143749800	A	C	0.0308	79528	7.353	1.938e-13	155885249	156481336	NO
Cortical surface area	Global	Total	7	156190490	rs35659302	T	G	0.4282	77917	6.501	7.997e-11	155932546	156440490	NO
Cortical surface area	Global	Total	8	57184334	rs6997261	T	C	0.7139	47425	-6.645	3.041e-11	56859358	57514556	NO
Cortical surface area	Global	Total	8	105600354	rs7823671	T	G	0.1122	79204	6.582	4.656e-11	105259049	105923807	YES
Cortical surface area	Global	Total	8	145827869	rs28970743	T	C	0.4923	78692	-6.308	2.832e-10	145456276	146157866	YES
Cortical surface area	Global	Total	9	88979177	rs7872941	T	G	0.4497	76833	-6.399	1.562e-10	88620612	89304449	NO
Cortical surface area	Global	Total	9	92214995	rs2329383	T	C	0.5158	77769	-6.327	2.492e-10	91946502	92478559	NO
Cortical surface area	Global	Total	9	118980297	rs418382	A	G	0.415	79086	-8.075	6.744e-16	118667007	119251088	NO
Cortical surface area	Global	Total	10	12206193	rs876089	T	G	0.4881	78995	7.05	1.79e-12	11915461	12477317	YES
Cortical surface area	Global	Total	10	21797272	rs11012726	T	C	0.69	77678	8.39	4.848e-17	21516969	22538132	NO
Cortical surface area	Global	Total	10	89655242	rs3831732	CA	C	0.4005	77224	-7.03	2.061e-12	89389056	90086495	NO
Cortical surface area	Global	Total	10	89779589	rs61853411	T	G	0.8811	78821	-6.316	2.685e-10	89529589	90029589	NO
Cortical surface area	Global	Total	10	105056473	rs2030205	C	G	0.2357	78993	10.947	6.869e-28	104294753	105495352	NO
Cortical surface area	Global	Total	10	105221736	rs7900899	A	G	0.478	78371	-6.447	1.138e-10	104971736	105515610	NO
Cortical surface area	Global	Total	11	57608992	rs659165	A	C	0.5733	79003	-6.283	3.33e-10	57179480	58083487	YES
Cortical surface area	Global	Total	11	92551673	11:92551673_GC_G	G	GC	0.3238	76462	-6.259	3.867e-10	92067858	92808342	NO
Cortical surface area	Global	Total	12	4400111	rs3217870	T	C	0.6096	78694	-7.628	2.386e-14	4142391	4655389	YES
Cortical surface area	Global	Total	12	12853288	12:12853288_TTTG_T	T	TTTG	0.1329	73231	-6.197	5.767e-10	12603288	13133632	NO
Cortical surface area	Global	Total	12	12871099	rs2066827	T	G	0.7667	71241	8.558	1.144e-17	12621099	13121099	YES
Cortical surface area	Global	Total	12	49405743	rs11168822	A	C	0.6128	78829	-7.602	2.918e-14	49137131	49729968	NO
Cortical surface area	Global	Total	12	53843771	rs111939932	T	C	0.1781	78082	8.692	3.551e-18	53403541	54352873	NO
Cortical surface area	Global	Total	12	53973774	rs12810098	C	G	0.4385	78158	7.877	3.35e-15	53664829	54342391	NO
Cortical surface area	Global	Total	12	56470625	rs11171739	T	C	0.5695	78422	-10.312	6.205e-25	56108712	56870797	NO
Cortical surface area	Global	Total	12	65874956	rs73123652	T	C	0.8906	77362	6.517	7.171e-11	65468299	66124956	NO
Cortical surface area	Global	Total	12	66239111	rs2612059	A	C	0.8558	79195	7.486	7.112e-14	65918151	66565998	NO
Cortical surface area	Global	Total	12	66327632	rs10878349	A	G	0.4926	78950	13.452	2.988e-41	65913835	66641396	NO
Cortical surface area	Global	Total	12	68216239	rs35227403	A	T	0.0598	78566	-8.813	1.22e-18	67952102	68563509	NO
Cortical surface area	Global	Total	12	79782450	rs55646296	T	C	0.1345	79178	-7.221	5.156e-13	79509364	80364680	NO
Cortical surface area	Global	Total	12	102922986	rs2195243	C	G	0.2212	76811	-10.401	2.446e-25	102144872	103196220	NO
Cortical surface area	Global	Total	12	109103673	rs4964273	T	G	0.484	79091	-6.473	9.618e-11	108782489	109434349	NO
Cortical surface area	Global	Total	12	112007756	rs653178	T	C	0.5174	77512	7.153	8.46e-13	111458458	113133476	NO
Cortical surface area	Global	Total	14	23438980	rs10146424	T	G	0.6025	78275	7.69	1.469e-14	23122913	23744987	NO
Cortical surface area	Global	Total	14	98537898	rs28445523	T	C	0.2125	78041	-6.195	5.819e-10	98272675	98891215	NO
Cortical surface area	Global	Total	15	55978024	rs16976472	C	G	0.255	78605	6.37	1.896e-10	55712861	56233271	NO
Cortical surface area	Global	Total	15	63874881	rs7180729	A	T	0.8373	79245	-6.747	1.513e-11	63550237	64382818	NO
Cortical surface area	Global	Total	17	7571752	rs78378222	T	G	0.9869	78002	-6.628	3.412e-11	7321752	7828671	NO
Cortical surface area	Global	Total	17	16099773	rs178809	A	C	0.5238	78845	-7.587	3.269e-14	15620401	16469049	NO
Cortical surface area	Global	Total	17	42437754	rs708383	A	G	0.3673	78779	6.169	6.853e-10	42187682	42704806	NO
Cortical surface area	Global	Total	17	43055579	rs11652522	A	C	0.106	77799	-6.813	9.589e-12	42805579	43305579	NO
Cortical surface area	Global	Total	17	43471481	rs7613	A	G	0.2781	56641	6.462	1.036e-10	43217452	43823827	NO
Cortical surface area	Global	Total	17	43511301	rs112421935	T	C	0.0377	44615	-9.894	4.438e-23	43261301	43761301	NO
Cortical surface area	Global	Total	17	43575228	rs2959945	T	C	0.9544	43833	12.12	8.241e-34	43325228	43903129	NO
Cortical surface area	Global	Total	17	43604278	rs28442065	A	G	0.0394	45284	-8.6	7.983e-18	43354278	43854278	NO
Cortical surface area	Global	Total	17	43672331	rs1724418	T	G	0.9584	43459	7.296	2.954e-13	43422331	43922331	NO
Cortical surface area	Global	Total	17	43677790	rs2693338	T	C	0.95	43272	8.578	9.674e-18	43212127	43972604	NO
Cortical surface area	Global	Total	17	43696532	rs371456541	A	G	0.9693	45230	9.187	4.054e-20	43446532	43946532	NO
Cortical surface area	Global	Total	17	43702019	rs55707468	A	G	0.0406	45750	-8.021	1.049e-15	43452019	43952019	NO
Cortical surface area	Global	Total	17	43702474	rs112473390	A	G	0.035	44723	-7.178	7.051e-13	43452474	43952474	NO
Cortical surface area	Global	Total	17	43710833	rs1635303	T	C	0.1904	52371	7.06	1.669e-12	43315690	43960833	NO
Cortical surface area	Global	Total	17	43908989	rs62054760	T	C	0.2215	76257	-20.587	3.56e-94	43120481	45124453	NO
Cortical surface area	Global	Total	17	43926458	rs143942024	T	C	0.0213	54888	-7.275	3.458e-13	42774167	44488559	NO
Cortical surface area	Global	Total	17	43926777	rs8079387	A	T	0.7578	70966	-6.886	5.719e-12	43526458	44176777	NO
Cortical surface area	Global	Total	17	43981642	rs562958995	A	G	0.976	47128	6.379	1.785e-10	43731642	44231642	NO
Cortical surface area	Global	Total	17	43992839	17:43992839_TG_T	T	TG	0.0304	47147	-6.45	1.116e-10	43742839	44242839	NO
Cortical surface area	Global	Total	17	44004302	rs536220361	T	C	0.0277	46157	-9.419	4.563e-21	43754302	44504985	NO
Cortical surface area	Global	Total	17	44012258	rs184466495	C	G	0.0317	45531	-8.533	1.426e-17	43762258	44262258	NO
Cortical surface area	Global	Total	17	44067847	rs2435213	T	G	0.1865	56935	6.362	1.997e-10	43809497	44330354	NO
Cortical surface area	Global	Total	17	44097378	rs751006572	A	AC	0.0356	45485	-7.054	1.739e-12	43847378	44347378	NO
Cortical surface area	Global	Total	17	44132237	rs553855497	T	G	0.0314	46163	-8.839	9.628e-19	43882237	44382237	NO
Cortical surface area	Global	Total	17	44152803	17:44152803_AGTGATTCTT_A	A	AGTGATTCTT	0.0455	43037	-7.963	1.676e-15	43902803	44402803	NO
Cortical surface area	Global	Total	17	44153861	rs36086421	CA	C	0.8985	37839	7.022	2.188e-12	43748278	44403861	NO
Cortical surface area	Global	Total	17	44281544	rs111575592	T	C	0.0403	48074	-6.169	6.879e-10	44028509	44531544	NO
Cortical surface area	Global	Total	17	44297728	17:44297728_G_C	C	G	0.2232	38853	-6.186	6.167e-10	44047728	44547728	NO
Cortical surface area	Global	Total	17	44330362	rs113193302	T	C	0.0251	46993	-6.799	1.05e-11	44020503	44580362	NO
Cortical surface area	Global	Total	17	44353261	rs55885927	T	C	0.9677	45061	8.93	4.273e-19	44103261	44603261	NO
Cortical surface area	Global	Total	17	44362049	rs560470249	T	TA	0.8954	48377	11.919	9.379e-33	44069971	44612049	NO
Cortical surface area	Global	Total	17	44570525	17:44570525_CT_C	CT	C	0.0365	44807	-6.477	9.34e-11	44320525	44820525	NO
Cortical surface area	Global	Total	17	44625928	rs1863115	A	C	0.7416	49045	-10.986	4.467e-28	43573585	45123995	NO
Cortical surface area	Global	Total	17	44833760	rs566083397	A	G	0.9786	47736	6.738	1.603e-11	44543105	45083760	NO
Cortical surface area	Global	Total	17	44906949	rs8069437	T	C	0.2295	71036	-6.737	1.614e-11	44651449	45295894	NO
Cortical surface area	Global	Total	17	47048961	rs4794008	T	C	0.2904	76515	7.084	1.398e-12	46752543	47318986	NO
Cortical surface area	Global	Total	17	47128247	rs2969	T	C	0.2524	77483	-8.729	2.559e-18	46707696	47400604	NO
Cortical surface area	Global	Total	19	13081089	rs11670895	A	G	0.2269	70810	-6.271	3.596e-10	12626964	13457146	NO
Cortical surface area	Global	Total	19	46131929	rs8101493	A	C	0.6249	76633	-6.4	1.556e-10	45868127	46385450	NO
Cortical surface area	Global	Total	20	3116192	rs857251	T	C	0.4966	79084	-6.931	4.192e-12	2837033	3410720	YES
Cortical surface area	Global	Total	20	33282198	rs6579186	C	G	0.4554	56581	8.335	7.726e-17	32264092	34130781	NO
Cortical surface area	Global	Total	20	39918474	rs17266604	T	C	0.9185	79257	6.206	5.43e-10	39420353	40213656	NO
Cortical surface area	Global	Total	20	49116932	rs79457282	C	G	0.0739	79268	7.838	4.587e-15	48816506	49477873	NO
Cortical surface area	Global	Total	22	42025823	rs28741121	A	G	0.1721	71773	7.05	1.795e-12	41614190	42460597	YES
Cortical surface area	Global	Total	22	42229092	rs41277471	C	G	0.1039	76120	-6.889	5.607e-12	41820374	42589525	YES
Cortical surface area	Global	Total	22	46440605	rs1135856	T	C	0.7099	73630	6.722	1.797e-11	46161969	46695002	NO
Cortical surface area	Occipital	Cuneus	1	18968714	1:18968714_GT_G	G	GT	0.3774	77075	-9.447	3.471e-21	18655366	19257083	NO
Cortical surface area	Occipital	Cuneus	1	23429461	rs76647086	T	G	0.1749	79480	7.173	7.315e-13	23043972	23920801	NO
Cortical surface area	Occipital	Cuneus	1	26900805	rs12121702	A	G	0.1426	79579	-6.162	7.202e-10	26502992	27152694	NO
Cortical surface area	Occipital	Cuneus	1	47980916	rs6658111	T	G	0.6338	78848	-8.091	5.935e-16	47706731	48246204	NO
Cortical surface area	Occipital	Cuneus	1	49396989	rs1343432	C	G	0.2467	79705	-6.236	4.492e-10	49121194	50841851	NO
Cortical surface area	Occipital	Cuneus	1	62934002	rs12124281	A	G	0.3387	78168	6.705	2.015e-11	62651243	63432135	NO
Cortical surface area	Occipital	Cuneus	1	64206779	rs4915924	A	G	0.2639	79681	-6.406	1.496e-10	63947276	64487404	NO
Cortical surface area	Occipital	Cuneus	1	113070079	rs188334139	T	G	0.9895	56744	7.207	5.719e-13	112820079	113425173	NO
Cortical surface area	Occipital	Cuneus	1	113239478	rs2999158	T	C	0.3343	79466	-9.243	2.395e-20	112804659	113502614	NO
Cortical surface area	Occipital	Cuneus	1	155123837	rs6676150	C	G	0.3946	79103	-6.206	5.436e-10	154873837	155436742	NO
Cortical surface area	Occipital	Cuneus	1	155861810	rs6670477	T	C	0.253	79501	7.103	1.222e-12	154928782	156266356	NO
Cortical surface area	Occipital	Cuneus	1	228219882	rs10916258	A	C	0.1963	78941	-6.85	7.408e-12	227883322	228641808	NO
Cortical surface area	Occipital	Cuneus	2	37068428	rs711244	T	C	0.4254	79345	7.441	9.961e-14	36802585	37527241	NO
Cortical surface area	Occipital	Cuneus	2	42271823	rs4952588	A	T	0.866	79220	-6.887	5.698e-12	41931679	42538320	NO
Cortical surface area	Occipital	Cuneus	2	45159091	rs1004787	A	G	0.5372	78569	6.389	1.671e-10	44884871	45420153	NO
Cortical surface area	Occipital	Cuneus	2	54547724	rs843627	A	G	0.9085	79117	-6.319	2.628e-10	54179834	54865325	NO
Cortical surface area	Occipital	Cuneus	2	105481492	rs1159966	A	G	0.587	78450	6.231	4.643e-10	105221497	105744516	NO
Cortical surface area	Occipital	Cuneus	2	160993090	rs62177941	T	C	0.2339	78902	-6.302	2.933e-10	160649566	161530616	YES
Cortical surface area	Occipital	Cuneus	2	162888055	rs2284871	T	C	0.3119	79382	-6.457	1.068e-10	162601147	163158664	NO
Cortical surface area	Occipital	Cuneus	3	45672210	rs893563	A	G	0.237	78964	-6.216	5.111e-10	45368309	45942006	NO
Cortical surface area	Occipital	Cuneus	3	48920127	rs7649458	T	C	0.6526	79363	-6.181	6.379e-10	48474811	49439195	NO
Cortical surface area	Occipital	Cuneus	3	55373546	rs12637474	A	T	0.2951	79569	-8.106	5.237e-16	55100567	55737515	NO
Cortical surface area	Occipital	Cuneus	3	104644366	3:104644366_GA_G	G	GA	0.0889	56873	-6.288	3.226e-10	104333940	104997151	NO
Cortical surface area	Occipital	Cuneus	3	104664955	rs1393740	A	C	0.4844	79465	14.803	1.4e-49	104396815	105078166	NO
Cortical surface area	Occipital	Cuneus	3	104707278	rs114432877	A	G	0.9577	78535	6.635	3.254e-11	104407425	104957278	NO
Cortical surface area	Occipital	Cuneus	3	104712013	rs112863269	T	C	0.9303	78769	6.684	2.317e-11	104462013	104978830	NO
Cortical surface area	Occipital	Cuneus	3	104790526	rs35712657	A	T	0.1048	63833	-7.576	3.57e-14	104540526	105040528	NO
Cortical surface area	Occipital	Cuneus	3	118995379	rs16829649	A	G	0.8904	79557	7.571	3.7e-14	118701945	119308525	NO
Cortical surface area	Occipital	Cuneus	3	124490575	rs12494985	A	G	0.1909	79623	6.366	1.939e-10	124196195	124768362	NO
Cortical surface area	Occipital	Cuneus	3	138696439	rs9809852	T	C	0.4541	77654	7.433	1.058e-13	138441912	139057620	NO
Cortical surface area	Occipital	Cuneus	3	147025139	rs75542880	A	T	0.1069	74227	-6.402	1.535e-10	146749001	147444688	NO
Cortical surface area	Occipital	Cuneus	3	147106319	rs2279829	T	C	0.2165	79400	6.62	3.594e-11	146856319	147433083	NO
Cortical surface area	Occipital	Cuneus	3	193811162	rs10933711	T	C	0.7141	77055	-7.583	3.385e-14	193536585	194067244	NO
Cortical surface area	Occipital	Cuneus	4	1003788	rs4569707	C	G	0.7102	79080	-7.498	6.47e-14	751742	1267235	NO
Cortical surface area	Occipital	Cuneus	4	19073685	rs12508031	A	T	0.6583	64043	-10.333	4.981e-25	18823685	19345652	NO
Cortical surface area	Occipital	Cuneus	4	19087520	rs182289	A	G	0.8384	75550	6.526	6.749e-11	18837520	19337520	NO
Cortical surface area	Occipital	Cuneus	4	53587940	rs10622884	T	TAGAA	0.8902	56803	-6.657	2.79e-11	53165541	53938665	NO
Cortical surface area	Occipital	Cuneus	4	103198082	rs13135092	A	G	0.9217	79406	-6.668	2.592e-11	102862470	103542422	NO
Cortical surface area	Occipital	Cuneus	4	145292676	rs4475093	C	G	0.2839	79572	11.689	1.455e-31	144977600	146424040	NO
Cortical surface area	Occipital	Cuneus	4	145659064	rs11727676	T	C	0.906	71762	-8.107	5.17e-16	145349908	146337979	NO
Cortical surface area	Occipital	Cuneus	4	145718861	rs757932380	G	GGTTA	0.4055	55953	-7.435	1.044e-13	145270608	146304016	NO
Cortical surface area	Occipital	Cuneus	4	156935238	rs77356543	A	G	0.3224	39894	7.399	1.377e-13	156611651	157241757	NO
Cortical surface area	Occipital	Cuneus	4	157068091	rs67808462	T	C	0.2969	78881	-8.714	2.927e-18	156621631	157408193	NO
Cortical surface area	Occipital	Cuneus	5	92950673	rs10064431	T	C	0.4804	79026	-6.81	9.779e-12	92641029	93200673	NO
Cortical surface area	Occipital	Cuneus	5	93021116	rs115136616	T	C	0.049	79622	8.184	2.746e-16	92433607	93787741	NO
Cortical surface area	Occipital	Cuneus	6	7112819	rs6925389	A	G	0.3729	79178	-7.242	4.423e-13	6760566	7396350	NO
Cortical surface area	Occipital	Cuneus	6	126995938	rs6912198	A	G	0.516	78941	6.772	1.267e-11	126428268	127305655	NO
Cortical surface area	Occipital	Cuneus	6	127052822	rs190958130	C	G	0.961	74362	10.438	1.659e-25	126029055	127619230	NO
Cortical surface area	Occipital	Cuneus	6	127246737	rs9401921	A	G	0.6226	78994	6.821	9.026e-12	126409043	127579967	NO
Cortical surface area	Occipital	Cuneus	6	151619930	rs200356147	CA	C	0.2255	49787	-6.441	1.189e-10	151368825	151875554	YES
Cortical surface area	Occipital	Cuneus	6	170545279	rs3012434	A	G	0.1896	70530	-7.939	2.031e-15	170295279	170796586	NO
Cortical surface area	Occipital	Cuneus	7	18915559	rs10237366	C	G	0.3801	78441	12.907	4.131e-38	18613899	19183411	NO
Cortical surface area	Occipital	Cuneus	7	42009395	rs3801159	T	C	0.6743	78412	7.954	1.804e-15	41753500	42280686	NO
Cortical surface area	Occipital	Cuneus	8	108966869	rs548953	T	C	0.6471	74215	6.696	2.143e-11	108633064	109262769	NO
Cortical surface area	Occipital	Cuneus	9	975112	rs279910	A	G	0.7013	79325	6.175	6.606e-10	713418	1237678	NO
Cortical surface area	Occipital	Cuneus	9	22446751	rs2671622	T	C	0.1185	79036	-6.49	8.574e-11	22131409	22696751	NO
Cortical surface area	Occipital	Cuneus	9	98187484	rs613040	T	C	0.9047	79397	7.723	1.135e-14	97887552	98448202	NO
Cortical surface area	Occipital	Cuneus	9	98218474	rs531236471	G	GC	0.6294	55598	11.765	5.913e-32	97893402	98564203	NO
Cortical surface area	Occipital	Cuneus	11	12072213	rs11022131	C	G	0.7514	76028	12.127	7.583e-34	11803432	12322400	NO
Cortical surface area	Occipital	Cuneus	11	47468569	rs3824867	A	G	0.2901	79655	-6.547	5.852e-11	47110412	48022963	NO
Cortical surface area	Occipital	Cuneus	11	104009590	rs361269	T	C	0.5813	79123	7.774	7.577e-15	103735306	104442793	NO
Cortical surface area	Occipital	Cuneus	11	112912947	rs2155645	T	C	0.2556	79003	-6.609	3.859e-11	112576709	113162947	NO
Cortical surface area	Occipital	Cuneus	11	133936487	rs12273384	A	G	0.1387	78858	-7.714	1.22e-14	133685551	134353629	NO
Cortical surface area	Occipital	Cuneus	12	24245244	12:24245244_AT_A	A	AT	0.3757	50439	7.182	6.857e-13	23904382	24517891	NO
Cortical surface area	Occipital	Cuneus	12	48392914	rs1793956	C	G	0.1548	79633	-9.732	2.2e-22	48115265	49021913	NO
Cortical surface area	Occipital	Cuneus	12	95412808	rs1648428	T	C	0.6685	79255	6.412	1.432e-10	95146906	95949699	NO
Cortical surface area	Occipital	Cuneus	12	123742692	12:123742692_TG_T	T	TG	0.7723	77685	6.48	9.182e-11	123200765	124158290	NO
Cortical surface area	Occipital	Cuneus	12	124564197	rs825467	C	G	0.5825	79674	-6.164	7.086e-10	124269846	124848267	YES
Cortical surface area	Occipital	Cuneus	12	130578130	rs7295050	A	G	0.7207	79705	-6.709	1.963e-11	130311364	130830716	NO
Cortical surface area	Occipital	Cuneus	13	80170160	rs2783130	A	G	0.5232	79705	-10.589	3.366e-26	79606806	80501200	NO
Cortical surface area	Occipital	Cuneus	13	81364694	rs1407547	A	G	0.3539	79060	-6.598	4.18e-11	81096507	81713534	NO
Cortical surface area	Occipital	Cuneus	14	29235537	rs12888467	C	G	0.5255	53052	7.196	6.211e-13	28958979	29511974	NO
Cortical surface area	Occipital	Cuneus	14	54311027	rs2150276	T	C	0.3264	79194	6.639	3.166e-11	54061027	54567548	NO
Cortical surface area	Occipital	Cuneus	14	54420647	rs71446481	A	ACC	0.5527	50457	-6.486	8.827e-11	54169965	54685049	NO
Cortical surface area	Occipital	Cuneus	14	57358469	rs72093709	G	GT	0.8044	46364	6.677	2.441e-11	57019825	57703600	NO
Cortical surface area	Occipital	Cuneus	14	58795687	rs8005422	A	G	0.3638	79692	7.659	1.872e-14	58414909	59095677	NO
Cortical surface area	Occipital	Cuneus	14	59072226	rs186347	T	G	0.4622	78710	-9.893	4.487e-23	58418484	59345285	NO
Cortical surface area	Occipital	Cuneus	14	59492298	rs10135369	T	C	0.1215	79374	-7.875	3.415e-15	59229823	59829164	NO
Cortical surface area	Occipital	Cuneus	14	59544104	rs1884587	T	C	0.5066	79260	-7.329	2.324e-13	59213548	59833205	NO
Cortical surface area	Occipital	Cuneus	14	59547296	rs11428189	T	TA	0.8512	47148	6.403	1.52e-10	59297296	59797587	NO
Cortical surface area	Occipital	Cuneus	14	59594939	rs4366626	T	C	0.2421	79539	6.929	4.235e-12	59342969	59989326	NO
Cortical surface area	Occipital	Cuneus	14	59624709	rs77794576	A	T	0.0119	77046	-7.449	9.43e-14	59374709	59874709	NO
Cortical surface area	Occipital	Cuneus	14	59627631	rs2164950	A	G	0.1254	79705	-23.257	1.2e-119	59199138	60283892	NO
Cortical surface area	Occipital	Cuneus	14	59631808	rs61986010	T	C	0.7053	78411	-6.233	4.59e-10	59373098	59882239	NO
Cortical surface area	Occipital	Cuneus	14	59660850	rs557742685	T	TGATGTTGC	0.5364	54145	-7.761	8.448e-15	59371562	60050321	NO
Cortical surface area	Occipital	Cuneus	14	59697746	rs17833810	A	G	0.5713	78914	-12.269	1.33e-34	59335331	60283018	NO
Cortical surface area	Occipital	Cuneus	14	59739352	rs149494783	T	C	0.0347	48870	-7.393	1.438e-13	59489352	59989352	NO
Cortical surface area	Occipital	Cuneus	14	59755578	rs565947904	A	C	0.9521	51132	10.176	2.532e-24	59505578	60005578	NO
Cortical surface area	Occipital	Cuneus	14	59795713	rs139249755	A	G	0.0113	68074	-8.75	2.142e-18	59233783	60470208	NO
Cortical surface area	Occipital	Cuneus	14	59828615	rs17834044	T	C	0.9881	78463	7.318	2.521e-13	59250119	60523517	NO
Cortical surface area	Occipital	Cuneus	14	59859305	rs764051016	T	TTTG	0.1513	54943	-8.652	5.041e-18	59567483	60303085	NO
Cortical surface area	Occipital	Cuneus	14	60271005	rs111590411	T	C	0.9864	56710	6.615	3.722e-11	59370217	60814434	NO
Cortical surface area	Occipital	Cuneus	14	103872951	rs12889703	A	T	0.3644	73964	6.553	5.643e-11	103573149	104268651	NO
Cortical surface area	Occipital	Cuneus	15	30208849	rs4779674	A	G	0.1831	79561	6.987	2.799e-12	29951188	30478811	NO
Cortical surface area	Occipital	Cuneus	15	39974703	rs7179013	A	C	0.394	77424	7.912	2.531e-15	39616671	40255095	NO
Cortical surface area	Occipital	Cuneus	15	39996744	rs16969637	T	C	0.8844	79622	9.015	1.964e-19	39570603	40408165	NO
Cortical surface area	Occipital	Cuneus	15	71606121	rs11072270	T	C	0.2736	78406	-6.485	8.857e-11	71356121	71856121	NO
Cortical surface area	Occipital	Cuneus	16	49540235	rs9935548	A	G	0.3655	79508	-7.306	2.755e-13	49289601	49819090	NO
Cortical surface area	Occipital	Cuneus	16	64985093	rs35145	A	G	0.6429	79455	7.274	3.484e-13	64686928	65384457	NO
Cortical surface area	Occipital	Cuneus	16	69099890	rs16958594	A	G	0.8957	74934	7.295	2.996e-13	68750416	69669394	NO
Cortical surface area	Occipital	Cuneus	16	87233516	rs4843552	A	G	0.576	79079	-6.41	1.451e-10	86974132	87483516	NO
Cortical surface area	Occipital	Cuneus	17	28044101	rs3102555	T	C	0.5076	79705	6.646	3.003e-11	27717374	28779025	NO
Cortical surface area	Occipital	Cuneus	17	63914750	rs1420791	A	G	0.9289	80081	12.401	2.571e-35	63475985	64533933	NO
Cortical surface area	Occipital	Cuneus	17	64331957	rs12450534	A	G	0.2469	77288	-6.334	2.384e-10	63899717	64581957	NO
Cortical surface area	Occipital	Cuneus	18	319935	rs12190	T	C	0.6446	79175	6.595	4.254e-11	69935	572109	NO
Cortical surface area	Occipital	Cuneus	19	19499598	rs60321073	A	G	0.8209	79661	-6.488	8.689e-11	19169810	19907500	NO
Cortical surface area	Occipital	Cuneus	20	52432451	rs4437022	A	C	0.4474	78906	10.321	5.673e-25	52161504	52722087	NO
Cortical surface area	Occipital	Cuneus	21	39897553	rs2836469	T	C	0.4183	79552	6.905	5.028e-12	39628982	40158935	YES
Cortical surface area	Occipital	Cuneus	22	46760481	rs9615351	C	G	0.7519	74501	-6.414	1.421e-10	46503179	47011497	NO
Cortical surface area	Occipital	Lateral Occipital	1	11856378	rs1801133	A	G	0.3339	79713	-6.596	4.223e-11	11606378	12137373	YES
Cortical surface area	Occipital	Lateral Occipital	1	18962095	rs1934057	T	C	0.4882	77565	-8.735	2.439e-18	18657484	19270823	NO
Cortical surface area	Occipital	Lateral Occipital	1	19968058	rs12408663	T	C	0.7631	78247	6.466	1.007e-10	19608807	20223920	NO
Cortical surface area	Occipital	Lateral Occipital	1	23331645	rs71514234	A	G	0.1667	70496	-6.472	9.685e-11	23012176	23959389	NO
Cortical surface area	Occipital	Lateral Occipital	1	64209144	rs11459197	CT	C	0.7393	79232	7.198	6.093e-13	63933430	64506988	NO
Cortical surface area	Occipital	Lateral Occipital	1	113063125	rs910697	A	G	0.5377	79237	6.393	1.625e-10	112813125	113492488	NO
Cortical surface area	Occipital	Lateral Occipital	1	155033308	rs11589479	A	G	0.1685	79713	-6.71	1.948e-11	154783308	155434975	NO
Cortical surface area	Occipital	Lateral Occipital	1	208433225	rs1664234	T	G	0.4474	79658	-6.403	1.526e-10	208173057	208706922	NO
Cortical surface area	Occipital	Lateral Occipital	2	45170153	rs4953152	A	G	0.3149	79713	7.989	1.36e-15	44862453	45425585	NO
Cortical surface area	Occipital	Lateral Occipital	2	105481492	rs1159966	A	G	0.5873	78458	6.996	2.636e-12	105216005	105813493	NO
Cortical surface area	Occipital	Lateral Occipital	3	64655357	rs6793277	T	G	0.7456	79242	6.43	1.279e-10	64396989	64912629	NO
Cortical surface area	Occipital	Lateral Occipital	3	89523038	rs12636275	A	C	0.3951	79703	-6.984	2.877e-12	89201721	90034599	NO
Cortical surface area	Occipital	Lateral Occipital	3	104724787	rs971550	A	T	0.6988	79347	9.291	1.524e-20	104393857	105078166	NO
Cortical surface area	Occipital	Lateral Occipital	3	118997177	rs112969546	A	G	0.1103	79557	-8.561	1.116e-17	118575188	119310080	NO
Cortical surface area	Occipital	Lateral Occipital	3	177312876	rs4857716	T	C	0.5865	77117	-7.687	1.501e-14	177021932	177592468	NO
Cortical surface area	Occipital	Lateral Occipital	3	190640634	rs56234707	T	C	0.6137	56711	7.75	9.195e-15	190342836	190929913	NO
Cortical surface area	Occipital	Lateral Occipital	4	1002848	rs34721481	A	T	0.7111	78983	-6.833	8.328e-12	751742	1269312	NO
Cortical surface area	Occipital	Lateral Occipital	4	19073685	rs12508031	A	T	0.6584	64001	-9.756	1.744e-22	18823685	19345652	NO
Cortical surface area	Occipital	Lateral Occipital	4	53602228	rs200059773	T	C	0.9602	47063	-6.809	9.834e-12	53352228	53853350	NO
Cortical surface area	Occipital	Lateral Occipital	4	53729166	rs3811781	T	G	0.8429	79646	-9.138	6.341e-20	53010679	54007835	NO
Cortical surface area	Occipital	Lateral Occipital	4	95025980	rs28532387	T	C	0.5722	72937	-7.102	1.231e-12	94687440	95689956	NO
Cortical surface area	Occipital	Lateral Occipital	4	145260561	rs7375701	A	G	0.7225	79203	-8.389	4.916e-17	144977879	146424040	NO
Cortical surface area	Occipital	Lateral Occipital	5	60088794	rs10057395	A	G	0.4644	79567	-7.286	3.203e-13	59592971	61086765	NO
Cortical surface area	Occipital	Lateral Occipital	5	92717239	rs1824488	T	C	0.2293	56819	-6.485	8.866e-11	92444005	93200673	NO
Cortical surface area	Occipital	Lateral Occipital	5	92872910	5:92872910_GA_G	G	GA	0.0466	72775	9.495	2.209e-21	92433607	93820731	NO
Cortical surface area	Occipital	Lateral Occipital	5	92900420	rs139884195	T	C	0.9873	56638	-6.421	1.356e-10	92440615	93815696	NO
Cortical surface area	Occipital	Lateral Occipital	6	126845380	rs1337736	A	G	0.2269	78339	-9.357	8.219e-21	126363946	127581542	NO
Cortical surface area	Occipital	Lateral Occipital	6	127107248	rs12525327	A	G	0.7426	78170	-6.374	1.845e-10	126703006	127417072	NO
Cortical surface area	Occipital	Lateral Occipital	6	170545279	rs3012434	A	G	0.1896	70491	-7.314	2.599e-13	170295279	170796586	NO
Cortical surface area	Occipital	Lateral Occipital	7	18915559	rs10237366	C	G	0.38	78449	7.459	8.687e-14	18619552	19183411	NO
Cortical surface area	Occipital	Lateral Occipital	7	42254073	rs2108365	A	C	0.8792	80041	-7.992	1.327e-15	41990694	42551038	NO
Cortical surface area	Occipital	Lateral Occipital	7	134531190	rs3800723	A	C	0.2209	79540	-6.305	2.885e-10	134281190	134809039	NO
Cortical surface area	Occipital	Lateral Occipital	7	155603978	rs9333596	A	G	0.8263	72564	-6.258	3.895e-10	155353978	155907480	NO
Cortical surface area	Occipital	Lateral Occipital	9	22381409	rs34254072	T	G	0.1182	79338	-6.673	2.505e-11	22131409	22696751	NO
Cortical surface area	Occipital	Lateral Occipital	9	98177308	rs357560	A	G	0.0958	79384	-7.104	1.212e-12	97887552	98448202	NO
Cortical surface area	Occipital	Lateral Occipital	9	98186326	rs357552	T	C	0.7062	79276	-7.152	8.531e-13	97886512	98439927	NO
Cortical surface area	Occipital	Lateral Occipital	9	98259703	rs10512248	T	G	0.665	79713	13.544	8.567e-42	97893402	98581995	NO
Cortical surface area	Occipital	Lateral Occipital	10	120018245	rs558358405	T	C	0.0072	56651	6.458	1.063e-10	119768245	120268245	NO
Cortical surface area	Occipital	Lateral Occipital	11	104004596	rs551300	A	G	0.4187	79121	-6.339	2.311e-10	103735306	104262767	NO
Cortical surface area	Occipital	Lateral Occipital	13	80170160	rs2783130	A	G	0.5231	79713	-7.858	3.914e-15	79609456	80486762	NO
Cortical surface area	Occipital	Lateral Occipital	13	107639450	rs4616147	A	G	0.3758	79661	7.626	2.423e-14	107318850	107974282	NO
Cortical surface area	Occipital	Lateral Occipital	14	29235537	rs12888467	C	G	0.5255	53052	8.966	3.08e-19	28953527	29518576	NO
Cortical surface area	Occipital	Lateral Occipital	14	29702590	rs12887636	T	G	0.6507	78521	-7.113	1.139e-12	29433173	30027492	NO
Cortical surface area	Occipital	Lateral Occipital	14	57271594	rs34337614	CA	C	0.3296	76079	-10.301	7.005e-25	57019825	57705943	NO
Cortical surface area	Occipital	Lateral Occipital	14	57337018	rs76398229	A	G	0.0454	79695	-8.158	3.41e-16	56982723	57688971	NO
Cortical surface area	Occipital	Lateral Occipital	14	59628609	rs74826997	T	C	0.8748	79582	20.149	2.73e-90	59199138	60283892	NO
Cortical surface area	Occipital	Lateral Occipital	14	59665813	rs8016382	T	C	0.3252	78471	7.971	1.576e-15	59359067	60054999	NO
Cortical surface area	Occipital	Lateral Occipital	14	59755578	rs565947904	A	C	0.9522	51132	7.369	1.713e-13	59505578	60005578	NO
Cortical surface area	Occipital	Lateral Occipital	14	59795713	rs139249755	A	G	0.0113	68071	-8.484	2.176e-17	59233783	60300001	NO
Cortical surface area	Occipital	Lateral Occipital	14	59859305	rs764051016	T	TTTG	0.1513	54943	-7.317	2.532e-13	59507002	60303085	NO
Cortical surface area	Occipital	Lateral Occipital	14	59894474	rs769099430	G	GCCAGCA	0.5817	56402	-8.096	5.68e-16	59425955	60297545	NO
Cortical surface area	Occipital	Lateral Occipital	14	60271005	rs111590411	T	C	0.9864	56710	7.013	2.34e-12	59370217	61024589	NO
Cortical surface area	Occipital	Lateral Occipital	14	98567784	rs145158260	T	TAACC	0.7847	56916	-6.851	7.318e-12	98281606	98892737	NO
Cortical surface area	Occipital	Lateral Occipital	15	30205735	rs4779672	T	C	0.1835	79502	6.287	3.232e-10	29950874	30473508	NO
Cortical surface area	Occipital	Lateral Occipital	15	39974703	rs7179013	A	C	0.3941	77432	6.568	5.113e-11	39724703	40255095	NO
Cortical surface area	Occipital	Lateral Occipital	15	63291484	rs12440897	T	C	0.644	78748	8.598	8.103e-18	63039985	63548677	NO
Cortical surface area	Occipital	Lateral Occipital	15	71606121	rs11072270	T	C	0.2737	78414	-6.286	3.248e-10	71356121	71856121	NO
Cortical surface area	Occipital	Lateral Occipital	15	87945274	rs2028549	A	T	0.6355	79440	-6.999	2.57e-12	87660115	88264021	NO
Cortical surface area	Occipital	Lateral Occipital	15	96855710	rs35014297	CT	C	0.2534	72647	-6.513	7.354e-11	96589069	97115507	YES
Cortical surface area	Occipital	Lateral Occipital	16	52571533	rs3112581	A	G	0.5281	79294	7.088	1.36e-12	52286885	52898731	NO
Cortical surface area	Occipital	Lateral Occipital	16	64995150	rs257498	A	C	0.3569	79458	-7.087	1.367e-12	64685280	65384457	NO
Cortical surface area	Occipital	Lateral Occipital	17	16945586	rs78365041	T	G	0.8293	78956	-7.128	1.022e-12	16694622	17352391	NO
Cortical surface area	Occipital	Lateral Occipital	17	42561291	rs12943380	C	G	0.9288	79028	-6.745	1.531e-11	42187000	42866315	NO
Cortical surface area	Occipital	Lateral Occipital	17	43912267	rs112691859	T	TG	0.7812	71088	8.702	3.256e-18	43167273	45115603	NO
Cortical surface area	Occipital	Lateral Occipital	17	44819595	rs17698176	T	G	0.7743	72647	-6.443	1.171e-10	44375928	45083217	NO
Cortical surface area	Occipital	Lateral Occipital	17	63534538	rs4541111	A	C	0.5098	76138	-6.242	4.31e-10	63268104	63784538	NO
Cortical surface area	Occipital	Lateral Occipital	18	335675	rs9964715	A	G	0.5813	74439	7.155	8.374e-13	68966	593344	NO
Cortical surface area	Occipital	Lateral Occipital	18	60720067	rs4941173	T	G	0.4083	71461	-6.883	5.875e-12	60456188	61016933	YES
Cortical surface area	Occipital	Lateral Occipital	19	13109460	rs55892736	A	G	0.628	78880	6.358	2.038e-10	12845292	13366521	NO
Cortical surface area	Occipital	Lateral Occipital	19	19560756	rs775175628	T	TATCTTATATTAA	0.1747	56576	6.522	6.946e-11	19124061	19907500	NO
Cortical surface area	Occipital	Lingual	1	18962095	rs1934057	T	C	0.4885	77596	-10.797	3.568e-27	18657484	19270823	NO
Cortical surface area	Occipital	Lingual	1	23388032	rs34092336	A	G	0.1713	74704	-6.598	4.162e-11	23081645	23959389	NO
Cortical surface area	Occipital	Lingual	1	47953368	rs78049119	T	C	0.1294	79188	-7.578	3.516e-14	47703368	48250732	NO
Cortical surface area	Occipital	Lingual	1	47974123	rs61784835	T	C	0.3611	78875	13.591	4.546e-42	47395846	48251930	NO
Cortical surface area	Occipital	Lingual	1	47985080	rs148759999	CA	C	0.0908	51777	-6.841	7.865e-12	47500692	48240199	NO
Cortical surface area	Occipital	Lingual	1	88271461	rs115422340	A	G	0.0204	78079	-6.372	1.864e-10	88005014	88528620	NO
Cortical surface area	Occipital	Lingual	1	113070079	rs188334139	T	G	0.9895	56744	8.379	5.316e-17	112716631	113425173	NO
Cortical surface area	Occipital	Lingual	1	113239478	rs2999158	T	C	0.3344	79505	-10.904	1.105e-27	112767515	113502614	NO
Cortical surface area	Occipital	Lingual	1	155738044	rs12081192	A	G	0.7003	79398	-6.814	9.508e-12	154845750	156213035	NO
Cortical surface area	Occipital	Lingual	1	166953866	rs6695609	T	G	0.2158	79679	-6.695	2.163e-11	166608941	167208710	NO
Cortical surface area	Occipital	Lingual	1	210558981	rs11581098	T	C	0.1525	79427	-6.208	5.381e-10	210238013	210827901	YES
Cortical surface area	Occipital	Lingual	2	16386265	rs55795022	A	T	0.2021	45336	-6.971	3.148e-12	16136265	16636265	NO
Cortical surface area	Occipital	Lingual	2	42181679	rs6740960	A	T	0.4866	54916	-6.161	7.211e-10	41931679	42448217	NO
Cortical surface area	Occipital	Lingual	2	45154908	rs528301	A	G	0.5603	79744	7.352	1.948e-13	44871466	45425585	NO
Cortical surface area	Occipital	Lingual	2	49369353	rs7577214	A	G	0.5499	79115	6.618	3.645e-11	49114434	49790530	NO
Cortical surface area	Occipital	Lingual	2	60252861	rs1007265	A	G	0.2814	79422	-6.552	5.666e-11	59867491	60509060	NO
Cortical surface area	Occipital	Lingual	2	162888055	rs2284871	T	C	0.3117	79421	-10.239	1.332e-24	162547621	163158664	NO
Cortical surface area	Occipital	Lingual	3	62544819	rs63227662	C	G	0.1396	79480	6.403	1.522e-10	62171292	62816118	NO
Cortical surface area	Occipital	Lingual	3	64543615	rs1014640	T	C	0.7625	78108	-6.875	6.202e-12	64293258	64874426	NO
Cortical surface area	Occipital	Lingual	3	64647156	rs13099002	A	G	0.2469	78876	-6.409	1.463e-10	64391150	64912629	NO
Cortical surface area	Occipital	Lingual	3	64885383	rs5012247	T	C	0.6629	66865	-6.472	9.641e-11	64613502	65141099	NO
Cortical surface area	Occipital	Lingual	3	64990899	rs12107861	T	C	0.216	79973	6.37	1.894e-10	64722656	65263180	NO
Cortical surface area	Occipital	Lingual	3	89520879	rs58803696	C	G	0.1454	74424	6.688	2.26e-11	89205557	90210191	NO
Cortical surface area	Occipital	Lingual	3	104212188	rs11710351	A	G	0.6025	79172	-6.405	1.499e-10	103929702	104468360	NO
Cortical surface area	Occipital	Lingual	3	104724787	rs971550	A	T	0.6987	79378	11.433	2.848e-30	104396815	105078166	NO
Cortical surface area	Occipital	Lingual	3	118995379	rs16829649	A	G	0.8904	79596	8.246	1.64e-16	118677015	119308579	NO
Cortical surface area	Occipital	Lingual	3	124887321	rs694828	A	T	0.2477	77726	-8.65	5.13e-18	124611189	125153881	NO
Cortical surface area	Occipital	Lingual	3	146993779	rs61508189	A	C	0.4815	79290	7.326	2.367e-13	146723383	147336268	NO
Cortical surface area	Occipital	Lingual	3	193810750	rs7642977	T	C	0.308	78386	6.471	9.761e-11	193537978	194062809	NO
Cortical surface area	Occipital	Lingual	4	1002848	rs34721481	A	T	0.7112	78926	-8.888	6.249e-19	751742	1269672	NO
Cortical surface area	Occipital	Lingual	4	19073685	rs12508031	A	T	0.6583	64059	-8.642	5.523e-18	18823685	19345652	NO
Cortical surface area	Occipital	Lingual	4	53728524	rs11538878	T	C	0.7576	79426	-9.07	1.191e-19	53165525	54024933	NO
Cortical surface area	Occipital	Lingual	4	124267871	rs7689547	C	G	0.2273	79187	6.747	1.513e-11	123935679	124522313	NO
Cortical surface area	Occipital	Lingual	4	145279701	rs7683975	A	C	0.2778	79522	9.657	4.604e-22	144977600	146424040	NO
Cortical surface area	Occipital	Lingual	4	145626096	rs6812389	C	G	0.4998	56661	8.446	3.018e-17	145270608	146257706	NO
Cortical surface area	Occipital	Lingual	4	146087979	rs116125427	A	G	0.0759	56694	8.005	1.19e-15	145371328	146337979	NO
Cortical surface area	Occipital	Lingual	5	60318015	rs7709522	A	G	0.5633	79651	9.99	1.679e-23	59502640	61050336	NO
Cortical surface area	Occipital	Lingual	5	81840853	rs35495443	T	C	0.5714	79306	-7.272	3.532e-13	81518421	82138418	NO
Cortical surface area	Occipital	Lingual	5	82254917	rs256797	A	C	0.8968	79562	-6.284	3.306e-10	81974549	82727540	NO
Cortical surface area	Occipital	Lingual	5	87969929	rs546577534	A	T	0.1363	51173	-7.104	1.213e-12	87686379	88250115	NO
Cortical surface area	Occipital	Lingual	5	94060082	rs67674687	C	G	0.7832	79702	-6.162	7.167e-10	93573951	94330778	NO
Cortical surface area	Occipital	Lingual	5	124260718	rs57063427	T	C	0.9044	79682	-8.223	1.992e-16	123967808	124622469	NO
Cortical surface area	Occipital	Lingual	5	124339525	rs9327347	A	G	0.8131	79705	7.326	2.376e-13	124069726	124646632	NO
Cortical surface area	Occipital	Lingual	6	7100029	rs12211604	A	G	0.6244	77173	6.91	4.844e-12	6764062	7445009	NO
Cortical surface area	Occipital	Lingual	6	92786021	rs2503647	T	C	0.6624	79489	6.389	1.675e-10	92499256	93111702	NO
Cortical surface area	Occipital	Lingual	6	127083941	rs9385403	T	C	0.2349	78870	-11.225	3.073e-29	126363946	127581542	NO
Cortical surface area	Occipital	Lingual	6	127095434	rs79127564	A	G	0.0175	56580	-6.427	1.305e-10	126845434	127345434	NO
Cortical surface area	Occipital	Lingual	6	127369230	rs139849708	T	C	0.9711	70020	8.819	1.156e-18	125879971	127619230	NO
Cortical surface area	Occipital	Lingual	6	170545279	rs3012434	A	G	0.1898	70625	-8.481	2.236e-17	170295279	170796108	NO
Cortical surface area	Occipital	Lingual	6	170777976	rs10946276	A	G	0.6075	78036	6.171	6.784e-10	170398866	171030767	NO
Cortical surface area	Occipital	Lingual	7	18915559	rs10237366	C	G	0.3798	78480	10.797	3.55e-27	18616844	19183411	NO
Cortical surface area	Occipital	Lingual	7	42260824	rs3801236	C	G	0.1214	79606	6.624	3.492e-11	41996630	42526346	NO
Cortical surface area	Occipital	Lingual	7	80437621	rs144307188	CTA	C	0.3394	78083	-6.863	6.756e-12	80161104	80714499	NO
Cortical surface area	Occipital	Lingual	7	107056427	7:107056427_GTA_G	G	GTA	0.2801	73747	7.56	4.021e-14	106546537	107550340	YES
Cortical surface area	Occipital	Lingual	7	156121080	rs78104430	T	C	0.9666	79392	6.761	1.375e-11	155871080	156371080	NO
Cortical surface area	Occipital	Lingual	8	13223301	rs13277620	T	C	0.737	79548	6.634	3.261e-11	12769554	13509618	YES
Cortical surface area	Occipital	Lingual	8	78091799	rs12550461	A	T	0.1212	79555	-6.688	2.257e-11	77841799	78748272	NO
Cortical surface area	Occipital	Lingual	8	108414413	rs1283691	T	C	0.4193	79586	-6.451	1.114e-10	108143959	108669763	NO
Cortical surface area	Occipital	Lingual	8	108966869	rs548953	T	C	0.647	74248	6.28	3.383e-10	108633064	109259951	NO
Cortical surface area	Occipital	Lingual	9	22446297	rs693370	A	G	0.118	79094	-7.005	2.472e-12	22131409	22996825	NO
Cortical surface area	Occipital	Lingual	9	98242925	rs2297087	A	G	0.7588	79420	10.421	1.995e-25	97897278	98558908	NO
Cortical surface area	Occipital	Lingual	10	104427083	rs7476050	A	G	0.6318	78570	-7.104	1.208e-12	104135132	104677253	NO
Cortical surface area	Occipital	Lingual	10	126427037	rs11245347	T	G	0.5809	79269	7.711	1.246e-14	126063386	126814695	NO
Cortical surface area	Occipital	Lingual	11	12072213	rs11022131	C	G	0.7513	76104	7.487	7.035e-14	11808766	12322400	NO
Cortical surface area	Occipital	Lingual	11	30602281	rs7124942	C	G	0.8344	78903	-7.931	2.174e-15	30331859	30888442	NO
Cortical surface area	Occipital	Lingual	11	30758215	rs628093	A	G	0.4278	78727	-6.948	3.705e-12	30501010	31027790	NO
Cortical surface area	Occipital	Lingual	11	31297701	11:31297701_GA_G	G	GA	0.3682	79296	-10.198	2.028e-24	30554996	32050874	NO
Cortical surface area	Occipital	Lingual	11	103988675	rs3102163	T	C	0.4183	79100	-7.373	1.672e-13	103735306	104269150	NO
Cortical surface area	Occipital	Lingual	11	125819058	rs2471473	T	C	0.6334	78669	6.213	5.215e-10	125568297	126085467	YES
Cortical surface area	Occipital	Lingual	12	65798921	rs7315978	T	C	0.3643	79694	7.042	1.892e-12	65505543	66092258	NO
Cortical surface area	Occipital	Lingual	12	130576938	rs61939359	T	C	0.2766	79610	8.13	4.3e-16	130306860	130830716	NO
Cortical surface area	Occipital	Lingual	13	22994580	rs76894892	A	G	0.2397	78615	-6.201	5.619e-10	22733760	23256264	NO
Cortical surface area	Occipital	Lingual	13	80170160	rs2783130	A	G	0.5227	79744	-10.05	9.156e-24	79606806	80501200	NO
Cortical surface area	Occipital	Lingual	13	100602848	rs12867720	A	T	0.7794	77565	-6.233	4.58e-10	100338589	100870080	NO
Cortical surface area	Occipital	Lingual	13	107639540	rs4335661	T	C	0.6239	79695	-6.425	1.318e-10	107337529	107927080	NO
Cortical surface area	Occipital	Lingual	14	29235537	rs12888467	C	G	0.5255	53052	7.59	3.209e-14	28958979	29511974	NO
Cortical surface area	Occipital	Lingual	14	54317110	rs7154164	A	G	0.2827	78978	7.527	5.201e-14	54045053	54599976	NO
Cortical surface area	Occipital	Lingual	14	59628609	rs74826997	T	C	0.8747	79613	17.973	3.159e-72	59199138	60283892	NO
Cortical surface area	Occipital	Lingual	14	59697746	rs17833810	A	G	0.571	78953	-7.73	1.077e-14	59387219	60054999	NO
Cortical surface area	Occipital	Lingual	14	59755578	rs565947904	A	C	0.9515	51132	6.955	3.523e-12	59505578	60005578	NO
Cortical surface area	Occipital	Lingual	14	59795713	rs139249755	A	G	0.0113	68095	-6.666	2.632e-11	59545713	60045713	NO
Cortical surface area	Occipital	Lingual	15	63295172	rs4775593	A	C	0.3468	78169	-7.879	3.301e-15	63037273	63548677	NO
Cortical surface area	Occipital	Lingual	15	98442471	rs6496265	C	G	0.3211	76218	6.186	6.16e-10	98181818	98692471	NO
Cortical surface area	Occipital	Lingual	16	64983881	rs35146	T	C	0.6425	79493	6.795	1.086e-11	64685280	65340019	NO
Cortical surface area	Occipital	Lingual	16	69135688	16:69135688_ACT_A	A	ACT	0.0998	72313	-6.213	5.201e-10	68667655	69385688	NO
Cortical surface area	Occipital	Lingual	17	43931626	rs17690987	T	C	0.7785	71436	7.235	4.64e-13	43245420	45112613	NO
Cortical surface area	Occipital	Lingual	17	47090785	rs11079849	T	C	0.3288	79322	-6.332	2.42e-10	46717037	47395848	NO
Cortical surface area	Occipital	Lingual	18	322109	rs7236292	A	G	0.6492	79744	8.799	1.378e-18	68032	593344	NO
Cortical surface area	Occipital	Lingual	19	32200518	rs11669334	T	G	0.1796	76880	-7.106	1.196e-12	31950518	32458909	NO
Cortical surface area	Occipital	Lingual	19	40933942	rs73046390	A	G	0.8195	76599	6.464	1.021e-10	40673776	41211575	YES
Cortical surface area	Occipital	Lingual	20	50423643	rs13038914	T	C	0.3599	79612	6.327	2.504e-10	50151894	50696692	YES
Cortical surface area	Occipital	Lingual	22	43618632	22:43618632_CG_C	CG	C	0.2781	77012	6.958	3.445e-12	43368632	43876035	NO
Cortical surface area	Occipital	Pericalcarine	1	18962095	rs1934057	T	C	0.4884	77599	-9.455	3.225e-21	18657484	19257083	NO
Cortical surface area	Occipital	Pericalcarine	1	19970727	rs3020595	C	G	0.7614	76679	7.626	2.414e-14	19569745	20223920	NO
Cortical surface area	Occipital	Pericalcarine	1	23497592	rs531079	A	T	0.3226	70522	6.229	4.702e-10	23063831	23747592	NO
Cortical surface area	Occipital	Pericalcarine	1	47974123	rs61784835	T	C	0.3611	78878	8.736	2.409e-18	47660711	48243130	NO
Cortical surface area	Occipital	Pericalcarine	1	63086001	rs12239737	A	T	0.3324	77129	6.404	1.515e-10	62651243	63449347	NO
Cortical surface area	Occipital	Pericalcarine	1	88178165	rs305466	C	G	0.8471	79925	6.388	1.678e-10	87913778	88473321	NO
Cortical surface area	Occipital	Pericalcarine	1	88269969	rs147753572	A	C	0.9796	78131	8.443	3.095e-17	87998707	88607613	NO
Cortical surface area	Occipital	Pericalcarine	1	88423397	rs1413536	T	C	0.5052	78482	-6.901	5.176e-12	88159499	88685308	NO
Cortical surface area	Occipital	Pericalcarine	1	113041294	rs61820477	A	T	0.098	78454	-6.16	7.268e-10	112791294	113367839	NO
Cortical surface area	Occipital	Pericalcarine	1	113063125	rs910697	A	G	0.5377	79271	11.605	3.909e-31	112767515	113502614	NO
Cortical surface area	Occipital	Pericalcarine	1	113070079	rs188334139	T	G	0.9895	56744	9.526	1.629e-21	112716631	113425173	NO
Cortical surface area	Occipital	Pericalcarine	1	154020378	rs6671009	T	C	0.1524	79736	-7.243	4.391e-13	153506191	154482768	NO
Cortical surface area	Occipital	Pericalcarine	1	155754448	rs6662953	T	C	0.2971	79363	7.287	3.17e-13	154845750	156266356	NO
Cortical surface area	Occipital	Pericalcarine	2	16386265	rs55795022	A	T	0.2021	45336	-7.415	1.22e-13	16136265	16636265	NO
Cortical surface area	Occipital	Pericalcarine	2	37697560	rs545538090	CT	C	0.4586	56719	7.602	2.924e-14	37430718	37960878	NO
Cortical surface area	Occipital	Pericalcarine	2	42181679	rs6740960	A	T	0.4867	54916	-9.268	1.891e-20	41881864	42450405	NO
Cortical surface area	Occipital	Pericalcarine	2	45154229	rs7568987	A	G	0.6872	79221	-7.601	2.943e-14	44887115	45425585	NO
Cortical surface area	Occipital	Pericalcarine	2	48246577	rs62135444	T	C	0.3788	79395	-7.982	1.444e-15	47927487	48574044	NO
Cortical surface area	Occipital	Pericalcarine	2	54615325	rs79272390	T	C	0.1564	77290	6.733	1.661e-11	54365325	54865325	NO
Cortical surface area	Occipital	Pericalcarine	2	54718022	rs12713259	T	C	0.7958	79438	6.169	6.883e-10	54443754	55138075	NO
Cortical surface area	Occipital	Pericalcarine	2	54904592	rs2007020	A	G	0.4323	78635	6.753	1.451e-11	54437254	55212723	NO
Cortical surface area	Occipital	Pericalcarine	2	60014759	rs6732097	T	C	0.4663	76961	6.65	2.939e-11	59752572	60273703	NO
Cortical surface area	Occipital	Pericalcarine	2	60133158	rs1344293	T	G	0.5227	79166	-7.436	1.04e-13	59766871	60539536	NO
Cortical surface area	Occipital	Pericalcarine	2	60589020	rs17330597	A	G	0.8957	79686	-6.593	4.301e-11	60327915	60852220	NO
Cortical surface area	Occipital	Pericalcarine	2	105481492	rs1159966	A	G	0.5873	78492	7.777	7.403e-15	105118319	105832964	NO
Cortical surface area	Occipital	Pericalcarine	2	159486587	rs34352482	A	AT	0.72	79165	6.251	4.09e-10	159165421	159775960	YES
Cortical surface area	Occipital	Pericalcarine	2	162888055	rs2284871	T	C	0.3119	79424	-10.336	4.842e-25	162547621	163158664	NO
Cortical surface area	Occipital	Pericalcarine	3	13827092	rs729638	T	C	0.3474	78703	6.301	2.96e-10	13572543	14079457	YES
Cortical surface area	Occipital	Pericalcarine	3	49965609	rs35917071	A	T	0.1025	74466	-6.216	5.108e-10	48473459	50459053	NO
Cortical surface area	Occipital	Pericalcarine	3	55424280	rs6808568	A	G	0.5185	79196	6.345	2.219e-10	55140691	55810144	NO
Cortical surface area	Occipital	Pericalcarine	3	64624377	rs7623286	A	G	0.4192	77373	6.314	2.711e-10	64293615	64884680	NO
Cortical surface area	Occipital	Pericalcarine	3	64989767	rs11917589	A	G	0.7833	80005	-6.204	5.508e-10	64722656	65263180	NO
Cortical surface area	Occipital	Pericalcarine	3	78295598	rs6776916	C	G	0.6664	79589	-7.084	1.404e-12	78033840	78580200	YES
Cortical surface area	Occipital	Pericalcarine	3	104194819	rs11715512	A	G	0.3861	79732	6.719	1.827e-11	103866395	104534483	NO
Cortical surface area	Occipital	Pericalcarine	3	104724787	rs971550	A	T	0.6987	79381	11.886	1.407e-32	104342713	105078166	NO
Cortical surface area	Occipital	Pericalcarine	3	118995379	rs16829649	A	G	0.8903	79599	9.068	1.215e-19	118658226	119309724	NO
Cortical surface area	Occipital	Pericalcarine	3	119045617	rs7612159	A	G	0.4308	79465	6.246	4.216e-10	118667513	119296533	NO
Cortical surface area	Occipital	Pericalcarine	3	124880511	rs628380	C	G	0.2454	78202	-9.131	6.773e-20	124616426	125153881	NO
Cortical surface area	Occipital	Pericalcarine	3	193810750	rs7642977	T	C	0.3082	78389	9.394	5.79e-21	193536585	194070518	NO
Cortical surface area	Occipital	Pericalcarine	4	1002448	rs6812278	C	G	0.2892	79054	9.964	2.196e-23	701179	1269672	NO
Cortical surface area	Occipital	Pericalcarine	4	19073685	rs12508031	A	T	0.6584	64029	-11.846	2.266e-32	18823685	19345652	NO
Cortical surface area	Occipital	Pericalcarine	4	19087520	rs182289	A	G	0.8383	75600	7.48	7.44e-14	18837520	19337520	NO
Cortical surface area	Occipital	Pericalcarine	4	19194490	rs75362427	T	C	0.0363	79412	6.161	7.251e-10	18944490	19679003	NO
Cortical surface area	Occipital	Pericalcarine	4	53670002	rs4864436	T	C	0.2062	78951	7.991	1.341e-15	53165525	54007835	NO
Cortical surface area	Occipital	Pericalcarine	4	103198082	rs13135092	A	G	0.9217	79448	-8.224	1.975e-16	102615304	103637094	NO
Cortical surface area	Occipital	Pericalcarine	4	145291128	rs4465994	T	C	0.7232	79546	-11.397	4.328e-30	144977600	146424040	NO
Cortical surface area	Occipital	Pericalcarine	4	145621328	rs75686861	A	G	0.0901	72708	9.027	1.759e-19	145296456	146424580	NO
Cortical surface area	Occipital	Pericalcarine	4	145626096	rs6812389	C	G	0.4998	56661	8	1.241e-15	145270608	146089264	NO
Cortical surface area	Occipital	Pericalcarine	4	156875373	rs10011805	A	G	0.1477	79184	7.141	9.298e-13	156620967	157241757	NO
Cortical surface area	Occipital	Pericalcarine	4	157071307	rs67487681	T	C	0.7033	78886	8.819	1.153e-18	156621631	157369346	NO
Cortical surface area	Occipital	Pericalcarine	5	59790985	rs26956	A	C	0.289	78484	6.681	2.376e-11	59320258	60093659	NO
Cortical surface area	Occipital	Pericalcarine	5	60382973	rs10939881	A	G	0.4425	79383	-15.554	1.506e-54	59437623	61105070	NO
Cortical surface area	Occipital	Pericalcarine	5	60466180	rs202010203	G	GT	0.8922	79685	-7.523	5.341e-14	59756482	60979887	NO
Cortical surface area	Occipital	Pericalcarine	5	60556609	rs12189444	A	G	0.7681	71043	-7.141	9.285e-13	59959162	61090498	NO
Cortical surface area	Occipital	Pericalcarine	5	81866998	rs752021310	CTAAT	C	0.4416	56152	6.47	9.827e-11	81518421	82116998	NO
Cortical surface area	Occipital	Pericalcarine	5	87951955	5:87951955_AT_A	A	AT	0.1618	79294	-7.451	9.287e-14	87686379	88251798	NO
Cortical surface area	Occipital	Pericalcarine	5	92977139	rs7735435	T	C	0.6805	74472	-7.066	1.59e-12	92452340	93677260	NO
Cortical surface area	Occipital	Pericalcarine	5	124260718	rs57063427	T	C	0.9044	79685	-10.342	4.527e-25	123906754	124675254	NO
Cortical surface area	Occipital	Pericalcarine	5	124339525	rs9327347	A	G	0.8131	79708	8.337	7.619e-17	124069726	124664284	NO
Cortical surface area	Occipital	Pericalcarine	6	7100029	rs12211604	A	G	0.6243	77179	6.957	3.477e-12	6768490	7383058	NO
Cortical surface area	Occipital	Pericalcarine	6	113341668	rs827082	A	T	0.239	79293	6.308	2.832e-10	112967970	113772366	YES
Cortical surface area	Occipital	Pericalcarine	6	126213598	rs144693257	T	C	0.0563	79194	-7.418	1.192e-13	125789661	126602586	NO
Cortical surface area	Occipital	Pericalcarine	6	126961319	rs6569466	T	C	0.2261	79066	-13.277	3.163e-40	126363946	127581542	NO
Cortical surface area	Occipital	Pericalcarine	6	127095434	rs79127564	A	G	0.0175	56580	-7.184	6.786e-13	126845434	127420574	NO
Cortical surface area	Occipital	Pericalcarine	6	127369230	rs139849708	T	C	0.9711	69962	10.737	6.819e-27	125799705	127715108	NO
Cortical surface area	Occipital	Pericalcarine	6	138862574	rs12200595	T	G	0.2753	78903	-9.65	4.893e-22	138573548	139177585	NO
Cortical surface area	Occipital	Pericalcarine	6	151622240	rs2499899	T	C	0.6062	77989	7.665	1.787e-14	151343348	151879132	YES
Cortical surface area	Occipital	Pericalcarine	6	170545279	rs3012434	A	G	0.1896	70584	-8.661	4.692e-18	170295279	170796586	NO
Cortical surface area	Occipital	Pericalcarine	6	170613286	rs12205465	A	G	0.1198	78582	6.509	7.58e-11	170363286	171038914	NO
Cortical surface area	Occipital	Pericalcarine	7	18915559	rs10237366	C	G	0.3799	78483	13.587	4.803e-42	18616844	19183411	NO
Cortical surface area	Occipital	Pericalcarine	7	19352694	rs11768802	T	C	0.5451	79481	-6.869	6.475e-12	19055933	19629686	NO
Cortical surface area	Occipital	Pericalcarine	7	80429399	rs6467399	A	G	0.3411	78809	-6.515	7.268e-11	80161104	80714499	NO
Cortical surface area	Occipital	Pericalcarine	7	156162410	rs10242287	T	C	0.6136	79344	6.301	2.965e-10	155906610	156420722	NO
Cortical surface area	Occipital	Pericalcarine	8	1840022	rs4875801	T	C	0.6411	78880	-6.169	6.853e-10	1590010	2093912	YES
Cortical surface area	Occipital	Pericalcarine	8	13223301	rs13277620	T	C	0.737	79551	7.941	1.999e-15	12769554	13510964	YES
Cortical surface area	Occipital	Pericalcarine	8	41954993	rs4736826	A	G	0.7423	78054	-6.479	9.208e-11	41670457	42253124	YES
Cortical surface area	Occipital	Pericalcarine	8	78091799	rs12550461	A	T	0.1212	79529	-8.682	3.901e-18	77766748	78846776	NO
Cortical surface area	Occipital	Pericalcarine	8	108966869	rs548953	T	C	0.647	74254	8.804	1.319e-18	108597459	109262769	NO
Cortical surface area	Occipital	Pericalcarine	9	98189458	rs357522	A	G	0.689	79747	-6.286	3.254e-10	97886512	98439458	NO
Cortical surface area	Occipital	Pericalcarine	9	98213728	rs9632916	C	G	0.763	78942	10.374	3.264e-25	97893402	98562126	NO
Cortical surface area	Occipital	Pericalcarine	9	125951448	rs4838032	T	G	0.8525	80063	6.989	2.766e-12	125351801	126294010	NO
Cortical surface area	Occipital	Pericalcarine	9	126425818	rs56250933	A	G	0.8262	79405	-7.443	9.843e-14	126085818	126701743	NO
Cortical surface area	Occipital	Pericalcarine	10	4640736	rs67690614	T	C	0.3361	78825	6.886	5.73e-12	4388819	4915091	NO
Cortical surface area	Occipital	Pericalcarine	10	21793824	rs11012725	T	C	0.3533	78986	-7.115	1.12e-12	21516969	22537419	NO
Cortical surface area	Occipital	Pericalcarine	10	126427037	rs11245347	T	G	0.581	79272	7.071	1.54e-12	126168782	126814695	NO
Cortical surface area	Occipital	Pericalcarine	11	11922325	rs4910031	T	C	0.5151	79655	-6.917	4.621e-12	11556753	12188568	NO
Cortical surface area	Occipital	Pericalcarine	11	12072213	rs11022131	C	G	0.7514	76084	11.464	1.994e-30	11770026	12322664	NO
Cortical surface area	Occipital	Pericalcarine	11	20070225	rs12283929	C	G	0.7429	78579	-6.391	1.645e-10	19820225	20320225	NO
Cortical surface area	Occipital	Pericalcarine	11	31257725	11:31257725_ACTT_A	A	ACTT	0.3679	79276	-11.434	2.842e-30	30548255	32100105	NO
Cortical surface area	Occipital	Pericalcarine	11	44374400	rs57334908	T	C	0.9463	79222	6.679	2.411e-11	44124400	44673998	NO
Cortical surface area	Occipital	Pericalcarine	11	92443925	rs1792361	T	C	0.3271	79188	-8.766	1.849e-18	91986687	92808342	NO
Cortical surface area	Occipital	Pericalcarine	11	104004596	rs551300	A	G	0.4187	79155	-10.791	3.786e-27	103735306	104446545	NO
Cortical surface area	Occipital	Pericalcarine	11	134079663	rs10894786	A	T	0.8444	79625	7.191	6.452e-13	133685551	134353629	NO
Cortical surface area	Occipital	Pericalcarine	12	5315245	rs2884783	T	C	0.2141	79594	9.223	2.883e-20	4997991	5570806	NO
Cortical surface area	Occipital	Pericalcarine	12	5317199	rs12317791	A	G	0.8392	75701	6.749	1.484e-11	5067199	5567199	NO
Cortical surface area	Occipital	Pericalcarine	12	24233479	rs11047249	A	G	0.3905	78588	7.874	3.423e-15	23904382	24517891	NO
Cortical surface area	Occipital	Pericalcarine	12	48377970	rs1635550	A	G	0.1665	78897	-8.259	1.469e-16	48122888	49013313	NO
Cortical surface area	Occipital	Pericalcarine	12	95592212	rs12820518	T	C	0.3083	79289	-6.983	2.891e-12	95139445	95949699	NO
Cortical surface area	Occipital	Pericalcarine	12	103437796	rs17041417	A	G	0.1724	79617	-6.324	2.552e-10	103187796	103738841	NO
Cortical surface area	Occipital	Pericalcarine	12	109260190	rs2111901	A	C	0.504	78567	6.804	1.019e-11	108779333	109510895	NO
Cortical surface area	Occipital	Pericalcarine	12	111982813	rs629404	A	T	0.2478	79696	6.261	3.826e-10	111583788	112905124	NO
Cortical surface area	Occipital	Pericalcarine	12	130576938	rs61939359	T	C	0.2765	79613	8.937	3.999e-19	130306860	130830716	NO
Cortical surface area	Occipital	Pericalcarine	13	80170160	rs2783130	A	G	0.5228	79747	-11.827	2.818e-32	79606806	80501200	NO
Cortical surface area	Occipital	Pericalcarine	13	80453102	rs6563145	T	C	0.8725	79321	-6.539	6.177e-11	80093690	80706454	NO
Cortical surface area	Occipital	Pericalcarine	13	81352132	rs34912613	A	G	0.1647	79173	-7.294	3e-13	81009502	81812924	NO
Cortical surface area	Occipital	Pericalcarine	14	25429598	rs17185460	T	C	0.7009	79326	8.693	3.541e-18	25179027	25769106	NO
Cortical surface area	Occipital	Pericalcarine	14	29243721	rs1884010	A	G	0.4386	74441	7.375	1.641e-13	28958979	29511974	NO
Cortical surface area	Occipital	Pericalcarine	14	59492298	rs10135369	T	C	0.1214	79416	-7.664	1.803e-14	59198808	59743053	NO
Cortical surface area	Occipital	Pericalcarine	14	59544104	rs1884587	T	C	0.5068	79302	-7.562	3.962e-14	59205818	59833205	NO
Cortical surface area	Occipital	Pericalcarine	14	59547296	rs11428189	T	TA	0.8512	47148	6.704	2.033e-11	59297296	59797296	NO
Cortical surface area	Occipital	Pericalcarine	14	59594939	rs4366626	T	C	0.2419	79581	7.448	9.48e-14	59342969	60050321	NO
Cortical surface area	Occipital	Pericalcarine	14	59624709	rs77794576	A	T	0.0119	77020	-7.722	1.141e-14	59241618	60099513	NO
Cortical surface area	Occipital	Pericalcarine	14	59628609	rs74826997	T	C	0.8747	79616	22.452	1.22e-111	59199138	60283892	NO
Cortical surface area	Occipital	Pericalcarine	14	59697746	rs17833810	A	G	0.5712	78956	-11.391	4.633e-30	59335331	60283018	NO
Cortical surface area	Occipital	Pericalcarine	14	59739352	rs149494783	T	C	0.0347	48870	-7.323	2.428e-13	59489352	59989352	NO
Cortical surface area	Occipital	Pericalcarine	14	59755578	rs565947904	A	C	0.9511	51132	9.466	2.917e-21	59505578	60005578	NO
Cortical surface area	Occipital	Pericalcarine	14	59795713	rs139249755	A	G	0.0114	68064	-8.319	8.884e-17	59298686	60228466	NO
Cortical surface area	Occipital	Pericalcarine	14	59859305	rs764051016	T	TTTG	0.1513	54943	-7.028	2.099e-12	59567483	60109305	NO
Cortical surface area	Occipital	Pericalcarine	14	59864709	rs1253140	A	T	0.726	22728	-6.414	1.422e-10	59614709	60114709	NO
Cortical surface area	Occipital	Pericalcarine	14	61456755	rs140660222	CT	C	0.2947	74150	-7.895	2.896e-15	60895875	61901278	NO
Cortical surface area	Occipital	Pericalcarine	15	39959900	rs2411299	T	C	0.8678	79405	9.939	2.821e-23	39570603	40408165	NO
Cortical surface area	Occipital	Pericalcarine	15	39974703	rs7179013	A	C	0.394	77466	7.399	1.367e-13	39616671	40281715	NO
Cortical surface area	Occipital	Pericalcarine	15	63292446	rs1489315	T	C	0.3475	78538	-6.763	1.356e-11	63039985	63547719	NO
Cortical surface area	Occipital	Pericalcarine	15	70699753	15:70699753_CTTAA_C	CTTAA	C	0.8774	78497	6.281	3.355e-10	70449753	70949753	NO
Cortical surface area	Occipital	Pericalcarine	16	28823040	16:28823040_AT_A	A	AT	0.3889	79331	10.025	1.187e-23	28080968	29251460	NO
Cortical surface area	Occipital	Pericalcarine	16	49544819	rs12924568	T	C	0.3672	74927	-6.93	4.213e-12	49289601	49807482	NO
Cortical surface area	Occipital	Pericalcarine	16	64995269	rs257497	T	C	0.3573	79492	-6.249	4.125e-10	64728158	65384457	NO
Cortical surface area	Occipital	Pericalcarine	16	69135688	16:69135688_ACT_A	A	ACT	0.0998	72371	-6.483	8.981e-11	68667655	69573076	NO
Cortical surface area	Occipital	Pericalcarine	16	77356115	rs74643232	C	G	0.115	74886	-6.232	4.597e-10	77087718	77666980	NO
Cortical surface area	Occipital	Pericalcarine	17	7754993	rs12939056	A	G	0.5643	79358	7.107	1.184e-12	7482351	8148460	NO
Cortical surface area	Occipital	Pericalcarine	17	28146068	rs9915270	T	C	0.4718	79744	6.631	3.331e-11	27712197	28779025	NO
Cortical surface area	Occipital	Pericalcarine	17	42285740	rs9895423	T	C	0.7606	79030	-6.905	5.013e-12	41947213	42580171	NO
Cortical surface area	Occipital	Pericalcarine	17	44161441	rs8079695	T	C	0.1873	68236	7.926	2.257e-15	43790184	45540078	NO
Cortical surface area	Occipital	Pericalcarine	17	44852612	rs62074125	A	C	0.7414	71573	6.176	6.573e-10	44602612	45102612	NO
Cortical surface area	Occipital	Pericalcarine	17	46970083	rs35130875	G	GA	0.4733	56820	-6.482	9.053e-11	46585629	47395848	NO
Cortical surface area	Occipital	Pericalcarine	17	63914750	rs1420791	A	G	0.9288	80117	9.741	2.008e-22	63475985	64533851	NO
Cortical surface area	Occipital	Pericalcarine	17	64331957	rs12450534	A	G	0.2468	77330	-6.231	4.624e-10	63697985	64581957	NO
Cortical surface area	Occipital	Pericalcarine	18	322109	rs7236292	A	G	0.6492	79747	7.725	1.119e-14	68966	585675	NO
Cortical surface area	Occipital	Pericalcarine	19	13111374	rs1548546	A	G	0.4112	74255	6.595	4.264e-11	12833967	13372612	NO
Cortical surface area	Occipital	Pericalcarine	19	24021327	rs2194275	A	G	0.1733	72149	-6.563	5.263e-11	23584095	24272906	NO
Cortical surface area	Occipital	Pericalcarine	19	40943831	rs111520561	T	C	0.1804	76146	-6.272	3.566e-10	40673776	41217430	YES
Cortical surface area	Occipital	Pericalcarine	20	16979509	rs59585835	A	G	0.2641	79316	7.188	6.559e-13	16714237	17286185	NO
Cortical surface area	Occipital	Pericalcarine	20	50423643	rs13038914	T	C	0.3598	79615	6.268	3.658e-10	50151376	50696692	YES
Cortical surface area	Occipital	Pericalcarine	20	52456445	rs6126982	T	G	0.4882	77142	11.111	1.108e-28	52161504	52722087	NO
Cortical surface area	Parietal	Inferior Parietal	1	50824328	rs2765892	A	G	0.5062	76655	6.578	4.78e-11	50553586	51668472	NO
Cortical surface area	Parietal	Inferior Parietal	1	88224586	rs305422	A	G	0.1327	78794	8.795	1.427e-18	87913403	88479973	NO
Cortical surface area	Parietal	Inferior Parietal	1	88254265	rs17481712	A	G	0.9857	56938	6.897	5.329e-12	88004265	88512469	NO
Cortical surface area	Parietal	Inferior Parietal	1	88423966	rs2991716	T	C	0.518	78332	-10.198	2.014e-24	88159499	88699559	NO
Cortical surface area	Parietal	Inferior Parietal	2	3403708	rs7584720	A	G	0.454	78593	-6.351	2.139e-10	3145383	3671168	NO
Cortical surface area	Parietal	Inferior Parietal	2	4538068	rs638603	T	C	0.2717	77201	-6.232	4.612e-10	4288068	4788068	NO
Cortical surface area	Parietal	Inferior Parietal	2	4554304	rs639016	C	G	0.203	79033	10.37	3.378e-25	4261132	4829292	NO
Cortical surface area	Parietal	Inferior Parietal	2	54615325	rs79272390	T	C	0.1565	77013	-9.609	7.347e-22	54179834	54865325	NO
Cortical surface area	Parietal	Inferior Parietal	2	54862003	rs2941580	A	G	0.4753	79470	-6.37	1.888e-10	54449067	55198321	NO
Cortical surface area	Parietal	Inferior Parietal	2	119039841	rs7595438	T	C	0.634	78832	7.064	1.612e-12	118780607	119313046	NO
Cortical surface area	Parietal	Inferior Parietal	2	119410650	rs34688471	CTTTTTTTTTTT	C	0.8409	50265	-6.498	8.148e-11	119071532	119676757	NO
Cortical surface area	Parietal	Inferior Parietal	2	162888055	rs2284871	T	C	0.3114	79147	6.617	3.671e-11	162547621	163158664	NO
Cortical surface area	Parietal	Inferior Parietal	3	62560523	rs6786550	T	C	0.3648	79470	-7.456	8.939e-14	62178098	62831078	NO
Cortical surface area	Parietal	Inferior Parietal	3	64602886	rs11923848	T	C	0.576	79356	6.501	7.997e-11	64304254	64884680	NO
Cortical surface area	Parietal	Inferior Parietal	3	104693252	rs13319705	T	C	0.3013	78848	9.824	8.879e-23	104396815	105078081	NO
Cortical surface area	Parietal	Inferior Parietal	3	118967410	rs35583194	G	GT	0.8273	74289	-6.907	4.965e-12	118658226	119308525	NO
Cortical surface area	Parietal	Inferior Parietal	3	177316085	rs4241484	A	C	0.5877	77140	7.196	6.218e-13	177062876	177592468	NO
Cortical surface area	Parietal	Inferior Parietal	4	145386473	rs11733975	T	C	0.7005	78691	6.811	9.695e-12	144977879	145771867	NO
Cortical surface area	Parietal	Inferior Parietal	4	145537850	rs11947381	T	C	0.4844	79110	-6.797	1.069e-11	145270608	145903694	NO
Cortical surface area	Parietal	Inferior Parietal	4	145621328	rs75686861	A	G	0.0901	72414	-6.285	3.283e-10	145371328	145909064	NO
Cortical surface area	Parietal	Inferior Parietal	5	60720682	rs12188627	A	G	0.5196	79461	7.159	8.115e-13	59826016	61093706	NO
Cortical surface area	Parietal	Inferior Parietal	5	61049055	rs2030890	A	C	0.5774	77354	-6.256	3.943e-10	60792352	61329032	NO
Cortical surface area	Parietal	Inferior Parietal	5	92011235	rs1501916	A	G	0.3993	78700	-6.248	4.162e-10	91749240	92284730	NO
Cortical surface area	Parietal	Inferior Parietal	5	92065186	rs34237157	A	G	0.1172	78436	7.047	1.826e-12	91808396	92317034	NO
Cortical surface area	Parietal	Inferior Parietal	5	92182752	rs6867851	C	G	0.4046	78331	10.014	1.326e-23	91827131	92463757	NO
Cortical surface area	Parietal	Inferior Parietal	5	92635678	rs61341720	A	C	0.0851	41864	6.68	2.382e-11	92385678	92885678	NO
Cortical surface area	Parietal	Inferior Parietal	5	128393299	rs12332475	T	C	0.0727	78351	-6.695	2.155e-11	127850108	128783184	NO
Cortical surface area	Parietal	Inferior Parietal	5	128734008	rs12187568	C	G	0.9264	52948	9.38	6.576e-21	128484008	129172574	NO
Cortical surface area	Parietal	Inferior Parietal	5	128880420	rs1363146	A	C	0.9124	74650	7.732	1.063e-14	128630420	129352550	NO
Cortical surface area	Parietal	Inferior Parietal	6	138869438	rs9399246	T	C	0.2822	78729	6.573	4.932e-11	138612574	139123329	NO
Cortical surface area	Parietal	Inferior Parietal	8	13218849	rs76289108	A	G	0.2631	79118	6.375	1.826e-10	12968386	13494554	YES
Cortical surface area	Parietal	Inferior Parietal	8	93202128	rs2218439	A	G	0.4245	78546	6.579	4.73e-11	92940014	93494504	NO
Cortical surface area	Parietal	Inferior Parietal	10	33478217	rs2253918	T	C	0.3497	73997	-6.178	6.472e-10	33221130	33759513	NO
Cortical surface area	Parietal	Inferior Parietal	11	46141422	rs148683230	A	G	0.1503	79069	6.272	3.568e-10	45812245	46417596	NO
Cortical surface area	Parietal	Inferior Parietal	11	114072659	rs61904685	A	G	0.1643	78481	-7.485	7.169e-14	113785516	114339435	NO
Cortical surface area	Parietal	Inferior Parietal	12	57918085	rs61741508	A	C	0.0242	73986	6.411	1.447e-10	57668085	58720456	NO
Cortical surface area	Parietal	Inferior Parietal	12	65795603	rs10878271	T	C	0.3628	79424	-12.041	2.162e-33	65427086	66176411	NO
Cortical surface area	Parietal	Inferior Parietal	14	58701638	rs11627138	T	C	0.356	77687	-6.163	7.138e-10	58421059	59106709	NO
Cortical surface area	Parietal	Inferior Parietal	14	59631075	14:59631075_GTTGT_G	G	GTTGT	0.1241	56316	8.209	2.224e-16	59335670	60163511	NO
Cortical surface area	Parietal	Inferior Parietal	15	39361029	rs11378087	A	AT	0.5057	56309	8.733	2.476e-18	39075617	39724607	NO
Cortical surface area	Parietal	Inferior Parietal	15	39983864	rs2129458	T	C	0.8874	79367	-6.329	2.468e-10	39559640	40297706	NO
Cortical surface area	Parietal	Inferior Parietal	15	56111324	rs933997	T	C	0.0982	79796	6.684	2.321e-11	55839888	56571602	NO
Cortical surface area	Parietal	Inferior Parietal	16	64986585	rs746971045	A	ACACT	0.3657	49925	6.343	2.25e-10	64692065	65384457	NO
Cortical surface area	Parietal	Inferior Parietal	17	65945840	rs7223813	A	G	0.8054	79339	-8.531	1.449e-17	65550140	66408546	NO
Cortical surface area	Parietal	Inferior Parietal	17	77781725	rs745570	A	G	0.4889	79102	6.451	1.113e-10	77518654	78050743	NO
Cortical surface area	Parietal	Inferior Parietal	17	79454615	rs12944953	T	G	0.6031	78445	-6.217	5.083e-10	79179358	79808741	NO
Cortical surface area	Parietal	Inferior Parietal	18	60720067	rs4941173	T	G	0.4085	71221	6.229	4.693e-10	60457555	61016955	YES
Cortical surface area	Parietal	Inferior Parietal	19	13109763	rs68175985	A	G	0.1607	76476	10.788	3.907e-27	12851196	13467705	NO
Cortical surface area	Parietal	Inferior Parietal	19	13151477	rs7508365	T	C	0.2778	77461	-7.464	8.418e-14	12879932	13401477	NO
Cortical surface area	Parietal	Inferior Parietal	19	13287413	rs777560995	A	ACTGT	0.2777	52159	6.683	2.334e-11	13035293	13542745	NO
Cortical surface area	Parietal	Inferior Parietal	20	52432451	rs4437022	A	C	0.4475	78671	-10.748	6.073e-27	52161504	52722087	NO
Cortical surface area	Parietal	Isthmus Cingulate	1	46179022	rs61784801	A	C	0.3026	78681	-6.411	1.444e-10	45791100	46848273	NO
Cortical surface area	Parietal	Isthmus Cingulate	1	54841838	rs6699195	T	C	0.4997	79403	6.532	6.495e-11	54584528	55104984	NO
Cortical surface area	Parietal	Isthmus Cingulate	1	54902490	rs12137626	A	G	0.1267	79560	-6.44	1.192e-10	54643163	55159260	NO
Cortical surface area	Parietal	Isthmus Cingulate	1	110035159	rs11590351	T	C	0.7533	79560	6.247	4.189e-10	109590918	110286998	YES
Cortical surface area	Parietal	Isthmus Cingulate	2	37090233	rs2110944	T	C	0.4736	78557	13.703	9.791e-43	36788485	37645638	NO
Cortical surface area	Parietal	Isthmus Cingulate	2	37252442	rs6731315	A	C	0.1654	79343	6.439	1.206e-10	36968757	37530571	NO
Cortical surface area	Parietal	Isthmus Cingulate	2	37380627	rs11894414	T	C	0.4718	79504	-6.3	2.981e-10	37125932	37664431	NO
Cortical surface area	Parietal	Isthmus Cingulate	2	58169418	rs2678897	A	G	0.6065	78796	-6.65	2.935e-11	57692325	58638696	NO
Cortical surface area	Parietal	Isthmus Cingulate	2	151641329	rs56245823	T	C	0.6288	78345	-6.611	3.817e-11	151367259	151904157	YES
Cortical surface area	Parietal	Isthmus Cingulate	2	226224786	rs12616022	A	T	0.7023	72081	6.467	1.001e-10	225902362	226479099	NO
Cortical surface area	Parietal	Isthmus Cingulate	3	55550689	rs73075483	T	C	0.7886	79079	-6.657	2.798e-11	55285699	55810144	NO
Cortical surface area	Parietal	Isthmus Cingulate	3	73227526	rs56043766	C	G	0.3422	79272	6.337	2.349e-10	72958064	73488650	NO
Cortical surface area	Parietal	Isthmus Cingulate	3	132779250	rs13085017	A	G	0.9328	78798	6.234	4.548e-10	132453267	133375215	NO
Cortical surface area	Parietal	Isthmus Cingulate	4	19073685	rs12508031	A	T	0.6584	63766	-7.579	3.474e-14	18823685	19326272	NO
Cortical surface area	Parietal	Isthmus Cingulate	4	20316053	rs2025287	C	G	0.2901	79515	6.382	1.752e-10	19865194	20571977	NO
Cortical surface area	Parietal	Isthmus Cingulate	4	145475012	rs10692527	T	TTAGAG	0.6062	56734	7.409	1.273e-13	144989684	146189305	NO
Cortical surface area	Parietal	Isthmus Cingulate	4	145621328	rs75686861	A	G	0.0901	72423	7.331	2.292e-13	145371328	146424040	NO
Cortical surface area	Parietal	Isthmus Cingulate	5	60024812	rs10939868	T	C	0.0846	79024	7.179	7.014e-13	59555730	60438270	NO
Cortical surface area	Parietal	Isthmus Cingulate	5	66115539	rs56403004	C	G	0.3488	79380	7.418	1.19e-13	65675955	66429049	NO
Cortical surface area	Parietal	Isthmus Cingulate	6	797811	rs6921457	T	C	0.8306	78879	6.989	2.774e-12	542837	1050496	NO
Cortical surface area	Parietal	Isthmus Cingulate	7	29345291	rs11771116	T	C	0.3266	79301	6.318	2.643e-10	29067649	29629479	YES
Cortical surface area	Parietal	Isthmus Cingulate	7	83824208	rs11981143	A	C	0.9454	75723	7.76	8.466e-15	83551953	84197468	NO
Cortical surface area	Parietal	Isthmus Cingulate	8	9591398	rs4841207	T	C	0.6958	79331	-6.204	5.513e-10	9314600	9930223	NO
Cortical surface area	Parietal	Isthmus Cingulate	8	109378270	rs773566622	T	TTG	0.6021	49569	6.322	2.575e-10	109128270	109838327	NO
Cortical surface area	Parietal	Isthmus Cingulate	9	98500560	rs100845	C	G	0.4297	78561	-6.27	3.602e-10	98250039	98776672	NO
Cortical surface area	Parietal	Isthmus Cingulate	11	20070225	rs12283929	C	G	0.7427	78392	-6.931	4.179e-12	19818321	20334391	NO
Cortical surface area	Parietal	Isthmus Cingulate	11	20129311	rs35891966	A	G	0.0731	57026	-8.081	6.406e-16	19869407	20379311	NO
Cortical surface area	Parietal	Isthmus Cingulate	12	5291962	rs78156452	T	C	0.2149	79413	-6.992	2.704e-12	5034122	5568226	NO
Cortical surface area	Parietal	Isthmus Cingulate	12	5537193	rs11063673	C	G	0.1212	78569	7.234	4.703e-13	5281325	5800738	NO
Cortical surface area	Parietal	Isthmus Cingulate	12	63032443	rs12229932	A	G	0.1099	78703	-7.449	9.414e-14	62498111	63305563	YES
Cortical surface area	Parietal	Isthmus Cingulate	12	65762058	rs12229918	C	G	0.3607	79363	9.677	3.76e-22	65446801	66141257	NO
Cortical surface area	Parietal	Isthmus Cingulate	12	78241285	rs1123680	A	G	0.7583	78221	-8.331	8.026e-17	77960194	78561898	NO
Cortical surface area	Parietal	Isthmus Cingulate	12	96618763	rs2300553	A	C	0.6408	77549	-6.593	4.303e-11	96305165	96871012	NO
Cortical surface area	Parietal	Isthmus Cingulate	12	117326943	rs113205216	A	C	0.0816	79516	7.025	2.141e-12	117059440	117756632	NO
Cortical surface area	Parietal	Isthmus Cingulate	14	31427198	rs72526347	A	ATTT	0.5235	56698	-6.535	6.381e-11	31111310	31751505	NO
Cortical surface area	Parietal	Isthmus Cingulate	14	59718153	rs772032965	G	GTT	0.0899	51627	-6.448	1.134e-10	59355116	60216409	NO
Cortical surface area	Parietal	Isthmus Cingulate	14	100361886	rs1998385	A	T	0.825	78686	-7.46	8.635e-14	100073211	100635736	NO
Cortical surface area	Parietal	Isthmus Cingulate	19	18546029	rs200158039	A	AG	0.3537	76771	-6.287	3.236e-10	18270865	18881332	NO
Cortical surface area	Parietal	Postcentral	1	113218638	1:113218638_GGGT_G	G	GGGT	0.2519	51122	6.702	2.054e-11	112814468	113486309	NO
Cortical surface area	Parietal	Postcentral	1	215160498	rs12123258	T	C	0.9299	78520	6.176	6.562e-10	214884722	215426935	NO
Cortical surface area	Parietal	Postcentral	2	188242369	rs62172372	A	G	0.7968	76780	-6.613	3.771e-11	187753118	188631367	NO
Cortical surface area	Parietal	Postcentral	3	62428323	rs75189942	T	C	0.0546	77757	-6.411	1.448e-10	62169273	62831479	NO
Cortical surface area	Parietal	Postcentral	3	147037285	rs77486287	T	C	0.0243	77062	-6.411	1.45e-10	146787285	147468844	NO
Cortical surface area	Parietal	Postcentral	3	147106319	rs2279829	T	C	0.2166	78901	-22.457	1.1e-111	146503091	147608826	NO
Cortical surface area	Parietal	Postcentral	3	147173469	rs10642083	A	ATG	0.7807	44504	6.711	1.932e-11	146831271	147423469	NO
Cortical surface area	Parietal	Postcentral	3	147248662	rs76525795	T	C	0.0176	75332	-6.451	1.115e-10	146998662	147498662	NO
Cortical surface area	Parietal	Postcentral	3	147339282	rs191664833	T	C	0.9766	73467	7.363	1.795e-13	146569307	147589282	NO
Cortical surface area	Parietal	Postcentral	3	147351456	rs34195741	T	C	0.356	78611	9.41	4.963e-21	146834749	147609962	NO
Cortical surface area	Parietal	Postcentral	4	53133096	rs13111477	C	G	0.4642	79169	-7.241	4.444e-13	52877604	53546310	NO
Cortical surface area	Parietal	Postcentral	4	53603336	rs28538980	A	G	0.9335	60736	6.469	9.891e-11	53350721	53853350	NO
Cortical surface area	Parietal	Postcentral	4	53694296	rs10016904	A	C	0.2251	78393	-9.636	5.616e-22	53022234	54117132	NO
Cortical surface area	Parietal	Postcentral	4	145434688	rs1032296	T	C	0.4145	77700	-6.778	1.222e-11	144977879	145761040	NO
Cortical surface area	Parietal	Postcentral	4	145511194	rs1996020	A	C	0.842	79176	-6.843	7.752e-12	145187014	145766378	NO
Cortical surface area	Parietal	Postcentral	5	92780983	rs31468	A	G	0.7215	77234	-8.349	6.89e-17	92433734	93195156	NO
Cortical surface area	Parietal	Postcentral	5	93348041	rs34039087	A	G	0.2632	78340	-13.065	5.209e-39	92438765	93713902	NO
Cortical surface area	Parietal	Postcentral	5	128734008	rs12187568	C	G	0.9264	52948	-6.889	5.634e-12	128484008	128984008	NO
Cortical surface area	Parietal	Postcentral	7	99929614	rs141981996	T	C	0.1163	76469	-6.415	1.405e-10	99457266	100447866	NO
Cortical surface area	Parietal	Postcentral	9	76144318	rs67286026	T	G	0.1982	75451	-8.75	2.134e-18	75555044	76443770	NO
Cortical surface area	Parietal	Postcentral	9	131978667	rs17440167	T	C	0.4808	75848	6.807	9.981e-12	131590856	132228667	YES
Cortical surface area	Parietal	Postcentral	11	37001542	rs11033898	C	G	0.4012	79073	8.449	2.935e-17	36741247	37284268	NO
Cortical surface area	Parietal	Postcentral	12	5888499	rs3782646	T	C	0.7648	74447	-7.19	6.489e-13	5633770	6162596	NO
Cortical surface area	Parietal	Postcentral	12	107004009	rs10861636	C	G	0.739	77745	-6.877	6.128e-12	106741545	107397542	NO
Cortical surface area	Parietal	Postcentral	13	36498290	rs9601646	A	G	0.5609	76345	-6.224	4.834e-10	36248290	36785494	NO
Cortical surface area	Parietal	Postcentral	14	29243721	rs1884010	A	G	0.4386	73831	-8.212	2.177e-16	28958979	29511974	NO
Cortical surface area	Parietal	Postcentral	14	59627434	14:59627434_AC_A	A	AC	0.1251	78778	7.49	6.894e-14	59335670	59919948	NO
Cortical surface area	Parietal	Postcentral	15	39580180	rs17692294	A	G	0.4486	78400	9.557	1.213e-21	39298743	39839144	NO
Cortical surface area	Parietal	Postcentral	15	39598407	rs141038481	T	C	0.9925	69326	-6.541	6.097e-11	39345301	39848407	NO
Cortical surface area	Parietal	Postcentral	15	39627855	rs76465453	T	C	0.0073	69286	8.46	2.68e-17	39291864	39877855	NO
Cortical surface area	Parietal	Postcentral	15	39639992	rs4924346	A	G	0.0899	78889	30.021	5.18e-198	39284404	39919067	NO
Cortical surface area	Parietal	Postcentral	15	39640301	rs148182077	T	C	0.007	62378	8.017	1.08e-15	39390301	39912740	NO
Cortical surface area	Parietal	Postcentral	15	39642878	rs79736426	A	G	0.0087	71061	7.066	1.593e-12	39381119	39919952	NO
Cortical surface area	Parietal	Postcentral	15	39647278	rs35391898	A	G	0.4591	77259	-14.458	2.231e-47	39282831	39920175	NO
Cortical surface area	Parietal	Postcentral	15	39662900	rs62002339	T	C	0.0062	52146	8.023	1.036e-15	39196757	39912900	NO
Cortical surface area	Parietal	Postcentral	15	39790908	rs4924363	A	G	0.8692	77973	-7.594	3.092e-14	39438840	40045475	NO
Cortical surface area	Parietal	Postcentral	19	32200518	rs11669334	T	G	0.1794	76318	-11.727	9.319e-32	31904657	32469531	NO
Cortical surface area	Parietal	Posterior Cingulate	1	54849057	1:54849057_GA_G	G	GA	0.5093	51446	-6.763	1.356e-11	54589533	55121469	NO
Cortical surface area	Parietal	Posterior Cingulate	1	87609509	rs12405406	A	G	0.1327	79871	-8.018	1.072e-15	87356624	87902502	NO
Cortical surface area	Parietal	Posterior Cingulate	2	37090233	rs2110944	T	C	0.4736	78891	10.623	2.331e-26	36788485	37619050	NO
Cortical surface area	Parietal	Posterior Cingulate	2	105481492	rs1159966	A	G	0.5873	78639	-6.586	4.517e-11	105202326	105746803	NO
Cortical surface area	Parietal	Posterior Cingulate	3	66047200	rs28550072	T	C	0.6988	73964	6.605	3.985e-11	65777343	66315674	NO
Cortical surface area	Parietal	Posterior Cingulate	3	193520975	rs610449	A	G	0.4523	77365	-6.447	1.145e-10	193267597	193770975	NO
Cortical surface area	Parietal	Posterior Cingulate	4	157786772	rs7662187	C	G	0.9002	79296	6.506	7.719e-11	157361157	158065887	NO
Cortical surface area	Parietal	Posterior Cingulate	4	187377003	rs59570572	T	C	0.1507	80050	6.854	7.203e-12	187116735	187640722	NO
Cortical surface area	Parietal	Posterior Cingulate	5	66145563	rs72761265	A	G	0.6435	79103	-9.758	1.704e-22	65675955	66466892	NO
Cortical surface area	Parietal	Posterior Cingulate	5	178547313	rs888762	A	C	0.6679	78909	6.209	5.33e-10	178234261	178797313	NO
Cortical surface area	Parietal	Posterior Cingulate	8	10011028	rs780735263	CT	C	0.6207	50978	6.786	1.15e-11	7838230	12143669	NO
Cortical surface area	Parietal	Posterior Cingulate	8	11808756	rs7817160	A	G	0.8504	75887	-6.502	7.94e-11	11558756	12058756	NO
Cortical surface area	Parietal	Posterior Cingulate	9	101633220	rs7874287	T	C	0.3032	78832	-6.585	4.536e-11	101375876	101909813	NO
Cortical surface area	Parietal	Posterior Cingulate	9	110422922	rs4979218	T	C	0.4618	79482	-6.545	5.944e-11	110166006	110696704	NO
Cortical surface area	Parietal	Posterior Cingulate	10	104418656	rs7923415	T	C	0.3669	79814	-6.567	5.122e-11	103969132	104793274	NO
Cortical surface area	Parietal	Posterior Cingulate	10	126486443	rs12764880	T	C	0.4312	79852	-7.85	4.15e-15	126055434	126801900	NO
Cortical surface area	Parietal	Posterior Cingulate	11	110951665	rs68122012	T	C	0.3072	79531	-6.287	3.232e-10	110695939	111261070	NO
Cortical surface area	Parietal	Posterior Cingulate	12	56478002	rs10876870	A	C	0.4281	78840	6.859	6.956e-12	56129060	56728658	NO
Cortical surface area	Parietal	Posterior Cingulate	12	117362212	rs4522274	A	G	0.861	74878	-6.369	1.905e-10	117089835	117724662	NO
Cortical surface area	Parietal	Posterior Cingulate	13	22980191	rs9316971	T	C	0.2955	77371	6.849	7.415e-12	22727789	23257223	NO
Cortical surface area	Parietal	Posterior Cingulate	14	29783863	14:29783863_AAAGGAAAGAAAGAGAGAGAAAGAC_A	A	AAAGGAAAGAAAGAGAGAGAAAGAC	0.6237	50738	6.255	3.986e-10	29525055	30104122	NO
Cortical surface area	Parietal	Posterior Cingulate	14	68796698	rs765590868	CAA	C	0.3489	51998	-6.459	1.055e-10	68507759	69065261	NO
Cortical surface area	Parietal	Posterior Cingulate	15	39633904	rs2033939	A	G	0.0816	79833	6.377	1.8e-10	39381771	39890378	NO
Cortical surface area	Parietal	Precuneus	1	19970727	rs3020595	C	G	0.7617	76778	-8.48	2.253e-17	19569745	20223920	NO
Cortical surface area	Parietal	Precuneus	1	87875774	rs1006598	A	C	0.1603	79851	-9.105	8.647e-20	87571000	88272810	NO
Cortical surface area	Parietal	Precuneus	1	93889568	rs35102250	C	G	0.5644	51073	6.523	6.913e-11	93293483	94257922	NO
Cortical surface area	Parietal	Precuneus	2	37068428	rs711244	T	C	0.4252	79491	-8.128	4.352e-16	36798883	37507386	NO
Cortical surface area	Parietal	Precuneus	2	37699187	rs11688783	T	C	0.4591	79851	-7.593	3.12e-14	37430097	38068236	NO
Cortical surface area	Parietal	Precuneus	2	42198217	rs4952552	A	G	0.4603	78614	6.199	5.689e-10	41948217	42448217	NO
Cortical surface area	Parietal	Precuneus	2	42275664	rs187184761	T	C	0.8566	79370	6.483	8.977e-11	41926266	42539122	NO
Cortical surface area	Parietal	Precuneus	2	221202051	2:221202051_TA_T	T	TA	0.5815	56268	-6.428	1.29e-10	220883176	221480167	NO
Cortical surface area	Parietal	Precuneus	2	223102937	rs13410020	A	G	0.1397	76877	-6.95	3.651e-12	222736828	223352937	YES
Cortical surface area	Parietal	Precuneus	3	57192294	rs11710921	T	G	0.3502	78738	7.151	8.585e-13	56930073	57454419	NO
Cortical surface area	Parietal	Precuneus	3	77587102	rs775761	A	G	0.7019	79435	6.524	6.847e-11	77277527	77935548	NO
Cortical surface area	Parietal	Precuneus	3	88919768	rs74854087	A	C	0.828	74941	-7.462	8.549e-14	88551003	89274605	NO
Cortical surface area	Parietal	Precuneus	3	104676606	rs7618202	A	G	0.5164	79153	-7.508	5.997e-14	104397183	105056853	NO
Cortical surface area	Parietal	Precuneus	3	190643193	rs60386222	T	G	0.382	76898	11.642	2.51e-31	190341272	190929913	NO
Cortical surface area	Parietal	Precuneus	3	193810750	rs7642977	T	C	0.3091	78493	-6.944	3.802e-12	193536585	194070138	NO
Cortical surface area	Parietal	Precuneus	4	1753424	rs11724531	A	G	0.2012	78940	7.211	5.555e-13	1435137	2015174	NO
Cortical surface area	Parietal	Precuneus	4	6927079	rs35680216	T	G	0.1149	80201	-6.33	2.45e-10	6667264	7256541	YES
Cortical surface area	Parietal	Precuneus	4	19073685	rs12508031	A	T	0.6586	64067	6.685	2.312e-11	18823685	19326272	NO
Cortical surface area	Parietal	Precuneus	4	53739856	rs1047959	C	G	0.7517	79237	8.013	1.116e-15	53409576	54007835	NO
Cortical surface area	Parietal	Precuneus	4	113417238	rs6846008	T	C	0.5114	79751	-8.076	6.668e-16	113102397	113843252	NO
Cortical surface area	Parietal	Precuneus	4	154711186	rs11937424	A	G	0.3196	79737	6.54	6.169e-11	154358453	155016634	NO
Cortical surface area	Parietal	Precuneus	4	164910216	rs3967465	A	C	0.4559	78039	7.528	5.157e-14	164544224	165160589	YES
Cortical surface area	Parietal	Precuneus	5	92180071	rs17082633	T	C	0.0668	78809	7.047	1.826e-12	91930071	92430071	NO
Cortical surface area	Parietal	Precuneus	5	92186059	rs888812	T	C	0.5085	79780	-11.199	4.106e-29	91827131	92509652	NO
Cortical surface area	Parietal	Precuneus	5	92636386	rs13166639	T	C	0.6405	58710	8.926	4.423e-19	92386386	92923526	NO
Cortical surface area	Parietal	Precuneus	5	102065504	rs41089	A	G	0.4686	79724	6.582	4.652e-11	101790379	102374513	NO
Cortical surface area	Parietal	Precuneus	6	2454367	rs35658601	A	G	0.1273	79525	7.869	3.579e-15	2115898	2705730	NO
Cortical surface area	Parietal	Precuneus	6	92006481	6:92006481_AGT_A	A	AGT	0.0947	79394	6.709	1.953e-11	91640213	92261531	NO
Cortical surface area	Parietal	Precuneus	6	126092158	rs9398788	C	G	0.3842	51853	6.605	3.975e-11	125790435	126508892	NO
Cortical surface area	Parietal	Precuneus	6	126389472	rs2179750	A	G	0.4094	77304	-6.432	1.258e-10	126030519	126639472	NO
Cortical surface area	Parietal	Precuneus	6	126732511	rs75343521	T	C	0.0407	78273	6.343	2.256e-10	126482511	127432732	NO
Cortical surface area	Parietal	Precuneus	6	138868516	rs9399245	T	G	0.7131	79027	-13.447	3.224e-41	138573548	139233282	NO
Cortical surface area	Parietal	Precuneus	6	170545279	rs3012434	A	G	0.1896	70597	7.647	2.05e-14	170295279	170796108	NO
Cortical surface area	Parietal	Precuneus	6	170548721	rs9460089	T	G	0.8272	75022	6.401	1.539e-10	170295720	170801067	NO
Cortical surface area	Parietal	Precuneus	7	18909223	rs11761877	A	G	0.2945	79485	-9.126	7.076e-20	18616844	19183411	NO
Cortical surface area	Parietal	Precuneus	7	134551474	rs11974887	T	C	0.5729	78494	-7.388	1.489e-13	134236925	134826547	NO
Cortical surface area	Parietal	Precuneus	8	21906359	rs11782167	A	G	0.2831	77511	-6.518	7.122e-11	21645773	22157091	NO
Cortical surface area	Parietal	Precuneus	8	26430091	rs12674776	T	C	0.5485	79151	6.761	1.37e-11	26147896	26711360	NO
Cortical surface area	Parietal	Precuneus	8	38613641	rs59960370	T	G	0.2615	79040	-6.271	3.581e-10	38352617	38987335	NO
Cortical surface area	Parietal	Precuneus	8	41182326	rs7008630	A	G	0.5716	79548	6.785	1.163e-11	40911759	41448566	NO
Cortical surface area	Parietal	Precuneus	9	980028	rs67074877	A	G	0.2423	78906	7.524	5.325e-14	722059	1239943	NO
Cortical surface area	Parietal	Precuneus	9	22446828	rs655497	A	G	0.7032	78921	-8.641	5.55e-18	21956987	22698846	NO
Cortical surface area	Parietal	Precuneus	9	89537928	rs1022994	A	C	0.4983	77359	6.927	4.286e-12	89287928	89787928	NO
Cortical surface area	Parietal	Precuneus	10	114711677	rs113999985	T	C	0.4478	46250	6.383	1.74e-10	114461677	114961677	NO
Cortical surface area	Parietal	Precuneus	10	114791371	rs11196197	T	C	0.158	79391	6.871	6.382e-12	114498029	115072735	NO
Cortical surface area	Parietal	Precuneus	10	118678712	rs4752018	A	C	0.2317	79235	10.061	8.209e-24	118356810	119146767	NO
Cortical surface area	Parietal	Precuneus	11	91570069	rs11607548	A	T	0.2434	79744	6.873	6.292e-12	91286763	91908787	NO
Cortical surface area	Parietal	Precuneus	11	91958391	rs11019877	A	G	0.1802	79687	6.252	4.056e-10	91699753	92223528	NO
Cortical surface area	Parietal	Precuneus	11	130445049	rs76259597	A	G	0.0963	79156	7.313	2.606e-13	130186588	130745507	NO
Cortical surface area	Parietal	Precuneus	12	24267891	rs11047271	T	C	0.6168	79098	-6.425	1.32e-10	23913241	24517891	NO
Cortical surface area	Parietal	Precuneus	12	65807344	rs58648873	A	AT	0.6373	79322	-10.78	4.289e-27	65427086	66165317	NO
Cortical surface area	Parietal	Precuneus	12	85660447	rs56166460	A	G	0.1872	79806	-7.028	2.1e-12	85169056	86007448	NO
Cortical surface area	Parietal	Precuneus	13	26459787	rs9507595	T	C	0.758	79449	7.526	5.224e-14	26066494	26726708	NO
Cortical surface area	Parietal	Precuneus	13	105991760	rs9519644	C	G	0.7775	75580	6.207	5.391e-10	105741760	106241760	YES
Cortical surface area	Parietal	Precuneus	13	107179352	rs1886178	A	T	0.4882	55632	6.353	2.11e-10	106925991	107441666	NO
Cortical surface area	Parietal	Precuneus	14	29684521	rs1569980	T	C	0.2349	79829	-8.845	9.182e-19	29286996	29957949	NO
Cortical surface area	Parietal	Precuneus	14	55585381	rs2147961	T	C	0.5613	79069	6.461	1.039e-10	55302500	56121452	YES
Cortical surface area	Parietal	Precuneus	14	59492298	rs10135369	T	C	0.1215	79520	7.702	1.336e-14	59213374	59774635	NO
Cortical surface area	Parietal	Precuneus	14	59519751	14:59519751_CT_C	CT	C	0.8669	75828	-7.056	1.708e-12	59267834	59833205	NO
Cortical surface area	Parietal	Precuneus	14	59610738	14:59610738_TA_T	T	TA	0.3296	74649	-6.956	3.498e-12	59356517	60039219	NO
Cortical surface area	Parietal	Precuneus	14	59620217	rs112123028	T	C	0.0103	76092	8.038	9.15e-16	59244310	60521005	NO
Cortical surface area	Parietal	Precuneus	14	59624709	rs77794576	A	T	0.0119	77148	9.244	2.37e-20	59241618	60099513	NO
Cortical surface area	Parietal	Precuneus	14	59628679	rs76341705	A	G	0.1252	79661	23.588	5.17e-123	59199138	60283892	NO
Cortical surface area	Parietal	Precuneus	14	59660850	rs557742685	T	TGATGTTGC	0.5364	54145	7.705	1.305e-14	59348398	60052834	NO
Cortical surface area	Parietal	Precuneus	14	59664984	rs1252916	T	C	0.4388	77236	-9.707	2.812e-22	59351765	60054999	NO
Cortical surface area	Parietal	Precuneus	14	59739352	rs149494783	T	C	0.0347	48870	7.527	5.198e-14	59489352	59989352	NO
Cortical surface area	Parietal	Precuneus	14	59755578	rs565947904	A	C	0.9522	51132	-10.575	3.875e-26	59505578	60005578	NO
Cortical surface area	Parietal	Precuneus	14	59776810	rs140130360	T	G	0.9853	79346	-6.882	5.908e-12	59524746	60026810	NO
Cortical surface area	Parietal	Precuneus	14	59795713	rs139249755	A	G	0.0113	68104	8.367	5.928e-17	59302387	60300001	NO
Cortical surface area	Parietal	Precuneus	14	59834017	rs10130826	T	G	0.5253	79482	7.775	7.556e-15	59563702	60157552	NO
Cortical surface area	Parietal	Precuneus	14	59880455	rs61985471	A	T	0.1626	78888	9.084	1.051e-19	59489295	60159106	NO
Cortical surface area	Parietal	Precuneus	14	60039248	rs76387505	A	C	0.91	79938	-7.155	8.357e-13	59391184	60338992	NO
Cortical surface area	Parietal	Precuneus	15	39590057	rs12907993	A	G	0.4676	79623	-6.472	9.64e-11	39332769	39841715	NO
Cortical surface area	Parietal	Precuneus	15	39647894	rs28520337	T	C	0.928	78900	6.54	6.168e-11	39381771	39914000	NO
Cortical surface area	Parietal	Precuneus	15	55962861	rs4774220	A	G	0.2486	79250	7.773	7.644e-15	55631107	56313040	NO
Cortical surface area	Parietal	Precuneus	15	63291484	rs12440897	T	C	0.6441	78886	-7.775	7.573e-15	63002835	63545172	NO
Cortical surface area	Parietal	Precuneus	15	63323880	rs4775604	T	G	0.4595	78849	-7.354	1.917e-13	63055332	63626661	NO
Cortical surface area	Parietal	Precuneus	16	24737683	rs540624274	CAA	C	0.7195	44445	6.527	6.727e-11	24448903	25106775	NO
Cortical surface area	Parietal	Precuneus	16	51482321	rs1345467	A	G	0.7282	78758	6.371	1.881e-10	51208290	51732321	NO
Cortical surface area	Parietal	Precuneus	16	64997013	rs257341	T	C	0.6428	79778	-7.579	3.47e-14	64685280	65384457	NO
Cortical surface area	Parietal	Precuneus	17	10112779	rs62058044	A	G	0.109	79275	-6.868	6.497e-12	9860014	10398631	YES
Cortical surface area	Parietal	Precuneus	17	28190961	rs7210991	T	C	0.5204	79800	9.33	1.059e-20	27660706	29100141	NO
Cortical surface area	Parietal	Precuneus	18	7591991	rs28399859	A	G	0.1521	79006	-6.3	2.985e-10	7292241	7866395	YES
Cortical surface area	Parietal	Precuneus	18	22353868	rs7239875	C	G	0.2427	79019	-7.409	1.277e-13	22068099	22660243	YES
Cortical surface area	Parietal	Precuneus	19	13109955	rs73006822	T	C	0.1502	76710	-8.424	3.654e-17	12654400	13415884	NO
Cortical surface area	Parietal	Precuneus	19	13207284	rs11555274	C	G	0.1174	75305	6.454	1.09e-10	12882215	13463749	NO
Cortical surface area	Parietal	Precuneus	19	46359553	rs12609371	A	G	0.673	79767	6.592	4.346e-11	45974557	46610520	NO
Cortical surface area	Parietal	Precuneus	20	6542634	rs1407031	T	C	0.3973	79089	6.602	4.054e-11	6229298	6834604	NO
Cortical surface area	Parietal	Precuneus	20	15619166	rs4813186	A	G	0.2807	79481	-7.879	3.304e-15	15365228	15874192	NO
Cortical surface area	Parietal	Precuneus	20	36849007	rs4811601	T	C	0.4625	78359	-10.518	7.142e-26	36559029	37129969	NO
Cortical surface area	Parietal	Superior Parietal	1	61839973	rs1884368	T	C	0.2463	74097	7.884	3.18e-15	61589973	62089973	NO
Cortical surface area	Parietal	Superior Parietal	1	85873237	rs12133722	T	C	0.2067	79306	6.384	1.723e-10	85525217	86168357	NO
Cortical surface area	Parietal	Superior Parietal	1	113072914	rs7522110	A	C	0.7387	79379	-7.231	4.812e-13	112814468	113478623	NO
Cortical surface area	Parietal	Superior Parietal	1	228206980	rs3094913	T	C	0.4829	78828	-6.311	2.767e-10	227862121	228503830	NO
Cortical surface area	Parietal	Superior Parietal	2	4536824	rs595795	T	C	0.623	77890	-7.503	6.232e-14	4245939	4788515	NO
Cortical surface area	Parietal	Superior Parietal	2	4562203	2:4562203_TACC_T	T	TACC	0.1837	77463	-13.025	8.812e-39	4245174	4883582	NO
Cortical surface area	Parietal	Superior Parietal	2	4597221	rs9308784	T	C	0.413	78692	-6.513	7.343e-11	4334583	4847221	NO
Cortical surface area	Parietal	Superior Parietal	2	5152760	rs139787591	T	C	0.072	78753	7.194	6.304e-13	4878045	5469219	NO
Cortical surface area	Parietal	Superior Parietal	2	58222928	rs2312147	T	C	0.3813	79405	-6.432	1.261e-10	57692987	58572226	NO
Cortical surface area	Parietal	Superior Parietal	2	206411325	rs6435287	C	G	0.4178	56272	-6.946	3.769e-12	206102140	206743232	NO
Cortical surface area	Parietal	Superior Parietal	2	221116583	rs6708161	C	G	0.6086	77214	-7.197	6.146e-13	220778000	221480167	NO
Cortical surface area	Parietal	Superior Parietal	3	57186580	rs17235841	A	C	0.7889	79405	-6.625	3.481e-11	56924274	57442294	NO
Cortical surface area	Parietal	Superior Parietal	3	70274177	rs73117911	T	G	0.0563	79150	-6.323	2.569e-10	69680625	70527478	NO
Cortical surface area	Parietal	Superior Parietal	3	71532621	rs62247165	T	C	0.4297	79277	-9.021	1.871e-19	71231127	71883324	NO
Cortical surface area	Parietal	Superior Parietal	3	147106319	rs2279829	T	C	0.2164	79100	-6.333	2.397e-10	146856319	147410015	NO
Cortical surface area	Parietal	Superior Parietal	4	19073685	rs12508031	A	T	0.6585	63972	6.159	7.342e-10	18823685	19326272	NO
Cortical surface area	Parietal	Superior Parietal	4	53603336	rs28538980	A	G	0.9337	60817	8.386	5.026e-17	53010679	53853350	NO
Cortical surface area	Parietal	Superior Parietal	4	53739856	rs1047959	C	G	0.7518	78791	13.286	2.78e-40	53165525	54118538	NO
Cortical surface area	Parietal	Superior Parietal	4	73414846	rs34468768	A	T	0.3043	77982	7.648	2.048e-14	73006772	73803871	NO
Cortical surface area	Parietal	Superior Parietal	4	113377710	rs231267	T	G	0.364	78998	-9.088	1.01e-19	113102397	113985580	NO
Cortical surface area	Parietal	Superior Parietal	4	129369735	rs4305532	T	C	0.3449	79070	6.7	2.086e-11	128985227	129630839	NO
Cortical surface area	Parietal	Superior Parietal	5	53314133	rs62372426	A	G	0.879	77663	-6.253	4.029e-10	53064133	53748399	YES
Cortical surface area	Parietal	Superior Parietal	5	92186059	rs888812	T	C	0.5087	79334	-10.006	1.427e-23	91884273	92463757	NO
Cortical surface area	Parietal	Superior Parietal	5	92646195	rs13176412	A	G	0.7026	78153	8.383	5.161e-17	92386386	92924287	NO
Cortical surface area	Parietal	Superior Parietal	5	92734471	rs10059375	A	G	0.0769	73663	-7.34	2.132e-13	92381530	93814643	NO
Cortical surface area	Parietal	Superior Parietal	5	92818904	rs62369931	A	G	0.1707	78867	8.905	5.326e-19	92467228	93787741	NO
Cortical surface area	Parietal	Superior Parietal	5	92932305	rs2279473	A	G	0.1404	79109	-9.06	1.31e-19	92424244	93896956	NO
Cortical surface area	Parietal	Superior Parietal	6	2414628	rs112701209	T	TTAAATG	0.8585	52061	-7.008	2.412e-12	2115898	2705730	NO
Cortical surface area	Parietal	Superior Parietal	6	92009596	rs4706392	A	T	0.8241	79132	-10.434	1.732e-25	91627758	92266259	NO
Cortical surface area	Parietal	Superior Parietal	7	21583519	rs6970597	A	C	0.4969	79303	6.423	1.339e-10	21328343	21835091	NO
Cortical surface area	Parietal	Superior Parietal	7	96189447	rs13241030	A	G	0.2923	78987	-6.345	2.229e-10	95866813	96504519	NO
Cortical surface area	Parietal	Superior Parietal	8	21905772	rs3176304	C	G	0.2675	76993	-7.456	8.945e-14	21652242	22171750	NO
Cortical surface area	Parietal	Superior Parietal	8	41182841	rs4736967	A	C	0.5727	79345	8.713	2.953e-18	40911759	41448566	NO
Cortical surface area	Parietal	Superior Parietal	9	13120380	rs10960954	T	C	0.5424	79405	-6.556	5.537e-11	12865771	13487530	NO
Cortical surface area	Parietal	Superior Parietal	9	126335211	rs28661002	T	C	0.7614	78227	7.811	5.694e-15	125936783	126701743	NO
Cortical surface area	Parietal	Superior Parietal	10	126424137	rs4962691	T	C	0.5789	78755	-8.776	1.688e-18	126052936	126814695	NO
Cortical surface area	Parietal	Superior Parietal	11	114082956	rs491823	A	C	0.7736	77097	-6.217	5.074e-10	113832956	114332956	NO
Cortical surface area	Parietal	Superior Parietal	12	6545417	rs7980991	A	C	0.7675	76290	-8.386	5.02e-17	6294617	6795531	NO
Cortical surface area	Parietal	Superior Parietal	12	65813523	rs10878276	T	G	0.3727	74540	-8.139	3.986e-16	65255788	66092985	NO
Cortical surface area	Parietal	Superior Parietal	12	106976190	rs111371565	T	TC	0.6171	56522	-6.378	1.789e-10	106711553	107400342	NO
Cortical surface area	Parietal	Superior Parietal	14	29226194	rs1955454	T	G	0.4313	77384	-8.61	7.32e-18	28958979	29511974	NO
Cortical surface area	Parietal	Superior Parietal	14	59631075	14:59631075_GTTGT_G	G	GTTGT	0.1241	56316	13.248	4.63e-40	59199138	60277907	NO
Cortical surface area	Parietal	Superior Parietal	14	59755578	rs565947904	A	C	0.9522	51132	-6.932	4.156e-12	59505578	60005578	NO
Cortical surface area	Parietal	Superior Parietal	14	59791629	rs941882	A	C	0.7569	79235	-6.941	3.903e-12	59229823	60042042	NO
Cortical surface area	Parietal	Superior Parietal	15	39585032	rs12909502	A	G	0.4676	79226	-7.639	2.182e-14	39292919	39897278	NO
Cortical surface area	Parietal	Superior Parietal	15	39633904	rs2033939	A	G	0.0816	79344	-19.444	3.291e-84	39284404	39919067	NO
Cortical surface area	Parietal	Superior Parietal	15	39634221	rs146247990	T	TGAGTGA	0.9798	49514	6.695	2.157e-11	39384221	39884221	NO
Cortical surface area	Parietal	Superior Parietal	15	67457698	rs35874463	A	G	0.9448	67158	6.378	1.793e-10	67207698	67707698	YES
Cortical surface area	Parietal	Superior Parietal	15	94941136	rs16949089	C	G	0.118	79129	6.466	1.006e-10	94683032	95246550	YES
Cortical surface area	Parietal	Superior Parietal	16	51492655	rs11389138	A	AG	0.3492	61785	-6.523	6.906e-11	51242655	51742655	NO
Cortical surface area	Parietal	Superior Parietal	17	42330171	rs2857078	A	C	0.3016	77084	6.632	3.304e-11	42042476	42580171	NO
Cortical surface area	Parietal	Superior Parietal	19	12867770	rs142578694	T	C	0.1709	68619	-7.303	2.806e-13	12401703	13167100	NO
Cortical surface area	Parietal	Superior Parietal	19	13083967	rs7248481	T	C	0.3798	74919	6.349	2.173e-10	12833967	13333967	NO
Cortical surface area	Parietal	Superior Parietal	19	13109955	rs73006822	T	C	0.1503	76263	-16.509	3.15e-61	12463636	13511586	NO
Cortical surface area	Parietal	Superior Parietal	19	13144062	rs10422784	A	C	0.2689	77816	8.601	7.914e-18	12862268	13449310	NO
Cortical surface area	Parietal	Superior Parietal	19	13213749	rs143783138	CG	C	0.1169	72959	6.57	5.044e-11	12854027	13465111	NO
Cortical surface area	Parietal	Superior Parietal	19	13290786	rs548119374	T	G	0.2782	53932	-10.147	3.427e-24	13030056	13555241	NO
Cortical surface area	Parietal	Superior Parietal	19	32207820	rs2043294	A	T	0.8197	76522	7.897	2.868e-15	31928927	32465509	NO
Cortical surface area	Parietal	Superior Parietal	20	39665497	rs150228091	A	G	0.1553	78935	6.84	7.905e-12	39366593	40519840	NO
Cortical surface area	Parietal	Superior Parietal	20	52450204	rs6091756	A	G	0.5901	78738	-8.248	1.608e-16	52161926	52721667	NO
Cortical surface area	Parietal	Superior Parietal	22	21971041	rs738129	T	C	0.1914	73947	6.462	1.032e-10	21666166	22249229	NO
Cortical surface area	Parietal	Supramarginal	1	228119604	rs686533	A	G	0.4781	78479	6.754	1.442e-11	227862121	228704725	NO
Cortical surface area	Parietal	Supramarginal	2	37903298	rs9973919	C	G	0.4625	54023	6.179	6.433e-10	37637646	38153370	NO
Cortical surface area	Parietal	Supramarginal	3	89534377	rs7632427	T	C	0.5966	79076	-8.845	9.145e-19	89023019	90237871	NO
Cortical surface area	Parietal	Supramarginal	3	147106319	rs2279829	T	C	0.2162	78771	-17.205	2.433e-66	146831149	147608826	NO
Cortical surface area	Parietal	Supramarginal	3	177335902	rs9829760	T	C	0.6664	77690	-7.016	2.289e-12	177062876	177595126	NO
Cortical surface area	Parietal	Supramarginal	4	1794188	rs736436	T	C	0.8042	65906	6.749	1.492e-11	1535592	2053970	NO
Cortical surface area	Parietal	Supramarginal	4	53603350	rs111364948	A	G	0.051	55906	-6.201	5.599e-10	53353350	53853350	NO
Cortical surface area	Parietal	Supramarginal	4	53729166	rs3811781	T	G	0.843	79009	10.395	2.603e-25	53068403	54095034	NO
Cortical surface area	Parietal	Supramarginal	5	91999005	rs62368468	A	C	0.8283	78655	-6.203	5.523e-10	91749005	92262438	NO
Cortical surface area	Parietal	Supramarginal	5	92018490	rs4869124	T	G	0.3262	78245	-6.79	1.122e-11	91727934	92298984	NO
Cortical surface area	Parietal	Supramarginal	5	92187932	rs17669337	T	C	0.4116	79076	6.834	8.259e-12	91932752	92741965	NO
Cortical surface area	Parietal	Supramarginal	5	92465130	rs4493655	T	C	0.268	75977	6.314	2.721e-10	92215130	92737382	NO
Cortical surface area	Parietal	Supramarginal	5	92635678	rs61341720	A	C	0.0851	41864	7.762	8.357e-15	92385678	92885678	NO
Cortical surface area	Parietal	Supramarginal	5	92636386	rs13166639	T	C	0.6403	58240	6.503	7.87e-11	92386386	92917984	NO
Cortical surface area	Parietal	Supramarginal	5	92941083	5:92941083_TTTG_T	T	TTTG	0.1383	78153	-6.229	4.682e-10	92690464	93243473	NO
Cortical surface area	Parietal	Supramarginal	5	92978315	rs112185863	A	T	0.9731	70165	-7.104	1.214e-12	92009507	93951414	NO
Cortical surface area	Parietal	Supramarginal	5	170844238	rs12055241	T	C	0.8017	78536	6.362	1.991e-10	170552642	171096151	NO
Cortical surface area	Parietal	Supramarginal	6	91978768	rs10498973	A	G	0.0949	78982	9.193	3.826e-20	91627589	92266259	NO
Cortical surface area	Parietal	Supramarginal	6	170349238	rs746437456	CTCTT	C	0.2506	56449	6.966	3.269e-12	170088952	170605259	NO
Cortical surface area	Parietal	Supramarginal	7	33423761	rs17724206	A	G	0.2478	78591	6.417	1.386e-10	32916801	33795820	NO
Cortical surface area	Parietal	Supramarginal	8	41167562	rs147918758	C	G	0.6061	77738	7.133	9.814e-13	40911759	41448566	NO
Cortical surface area	Parietal	Supramarginal	13	81291208	rs2794237	C	G	0.4241	76826	8.498	1.926e-17	80727052	81911226	NO
Cortical surface area	Parietal	Supramarginal	13	81465033	rs61967396	T	C	0.1358	78440	-7.153	8.485e-13	80861076	81818995	NO
Cortical surface area	Parietal	Supramarginal	14	58750902	rs2145600	C	G	0.2408	78523	-6.861	6.86e-12	58418484	59106709	NO
Cortical surface area	Parietal	Supramarginal	14	59069053	rs221326	T	G	0.4587	78009	10.238	1.335e-24	58548617	59345285	NO
Cortical surface area	Parietal	Supramarginal	14	59492298	rs10135369	T	C	0.1216	78745	8.117	4.789e-16	59229823	59829164	NO
Cortical surface area	Parietal	Supramarginal	14	59621562	rs11408108	A	AC	0.288	77448	-6.375	1.825e-10	59342969	59935836	NO
Cortical surface area	Parietal	Supramarginal	14	59628679	rs76341705	A	G	0.1251	78886	17.469	2.472e-68	59199138	60277907	NO
Cortical surface area	Parietal	Supramarginal	14	59664984	rs1252916	T	C	0.4389	76461	-8.137	4.036e-16	59351765	60042207	NO
Cortical surface area	Parietal	Supramarginal	14	59795713	rs139249755	A	G	0.0114	67588	7.082	1.426e-12	59233783	60045713	NO
Cortical surface area	Parietal	Supramarginal	14	98552165	rs1824578	A	T	0.2124	78191	-6.403	1.525e-10	98281606	98896939	NO
Cortical surface area	Parietal	Supramarginal	15	39084047	rs28702389	C	G	0.6811	78793	10.296	7.316e-25	38799090	39362034	NO
Cortical surface area	Parietal	Supramarginal	15	39382087	rs2411247	A	G	0.5335	75888	-7.273	3.513e-13	39092703	39769925	NO
Cortical surface area	Parietal	Supramarginal	15	39634221	rs146247990	T	TGAGTGA	0.9798	49514	7.864	3.717e-15	39384221	39884221	NO
Cortical surface area	Parietal	Supramarginal	15	39639898	rs4924345	A	C	0.9182	78785	21.542	6.35e-103	39284404	39919067	NO
Cortical surface area	Parietal	Supramarginal	15	39640301	rs148182077	T	C	0.007	62339	-8.044	8.673e-16	39390301	39912740	NO
Cortical surface area	Parietal	Supramarginal	15	39647278	rs35391898	A	G	0.4592	77129	7.78	7.257e-15	39292919	39920175	NO
Cortical surface area	Parietal	Supramarginal	15	39742570	rs62005276	T	C	0.1347	79285	-9.362	7.798e-21	39427303	40045475	NO
Cortical surface area	Parietal	Supramarginal	17	28208125	rs7226121	A	C	0.4988	78935	-6.709	1.962e-11	27698049	28779025	NO
Cortical surface area	Parietal	Supramarginal	19	32207820	rs2043294	A	T	0.8197	76383	6.863	6.731e-12	31928927	32465509	NO
Cortical surface area	Temporal	Banks of the Superior Temporal Sulcus	1	62903363	rs9436222	C	G	0.6661	77345	7.605	2.844e-14	62650811	63432135	NO
Cortical surface area	Temporal	Banks of the Superior Temporal Sulcus	2	4548643	rs670217	C	G	0.7972	78399	-8.416	3.899e-17	4261132	4829292	NO
Cortical surface area	Temporal	Banks of the Superior Temporal Sulcus	2	54615325	rs79272390	T	C	0.1564	76374	-6.772	1.27e-11	54365325	54865325	NO
Cortical surface area	Temporal	Banks of the Superior Temporal Sulcus	2	58169418	rs2678897	A	G	0.6067	78067	-7.881	3.258e-15	57692987	58987818	NO
Cortical surface area	Temporal	Banks of the Superior Temporal Sulcus	2	58235445	rs1518401	A	G	0.1861	78364	-6.176	6.568e-10	57923955	58491694	NO
Cortical surface area	Temporal	Banks of the Superior Temporal Sulcus	2	119045109	rs6728237	T	C	0.4231	78251	-6.758	1.397e-11	118773032	119465445	NO
Cortical surface area	Temporal	Banks of the Superior Temporal Sulcus	2	119417426	rs332067	C	G	0.1417	79047	6.279	3.405e-10	119077151	119691744	NO
Cortical surface area	Temporal	Banks of the Superior Temporal Sulcus	3	104724787	rs971550	A	T	0.6987	78465	-8.205	2.303e-16	104396849	105073323	NO
Cortical surface area	Temporal	Banks of the Superior Temporal Sulcus	3	177344387	rs7613181	A	G	0.6172	77029	-7.395	1.416e-13	177021932	177595126	NO
Cortical surface area	Temporal	Banks of the Superior Temporal Sulcus	4	145659064	rs11727676	T	C	0.906	71270	7.359	1.856e-13	145261040	145909064	NO
Cortical surface area	Temporal	Banks of the Superior Temporal Sulcus	5	92182752	rs6867851	C	G	0.4048	77692	7.195	6.247e-13	91884273	92451080	NO
Cortical surface area	Temporal	Banks of the Superior Temporal Sulcus	5	92870246	rs114468556	A	T	0.0458	72626	-8.423	3.667e-17	92433607	93820731	NO
Cortical surface area	Temporal	Banks of the Superior Temporal Sulcus	5	93534201	rs746406612	G	GAACAGA	0.127	56802	7.413	1.233e-13	92682305	93821190	NO
Cortical surface area	Temporal	Banks of the Superior Temporal Sulcus	5	93943859	rs10041843	A	T	0.2768	78160	-7.191	6.434e-13	93597051	94336368	NO
Cortical surface area	Temporal	Banks of the Superior Temporal Sulcus	6	98583487	rs760571548	CAT	C	0.515	51825	-6.381	1.755e-10	98142667	98841622	NO
Cortical surface area	Temporal	Banks of the Superior Temporal Sulcus	6	126079968	rs9321054	A	G	0.5225	78349	6.362	1.989e-10	125795148	126366953	NO
Cortical surface area	Temporal	Banks of the Superior Temporal Sulcus	7	42026272	rs2237430	T	C	0.6815	78461	-6.796	1.079e-11	41755678	42280686	NO
Cortical surface area	Temporal	Banks of the Superior Temporal Sulcus	8	1837920	rs142038932	A	G	0.9845	50114	-6.207	5.398e-10	1587911	2087920	YES
Cortical surface area	Temporal	Banks of the Superior Temporal Sulcus	8	93192813	rs3910842	T	G	0.5756	78343	-6.27	3.6e-10	92940014	93466034	NO
Cortical surface area	Temporal	Banks of the Superior Temporal Sulcus	9	98199331	rs113502615	A	G	0.0814	78714	7.58	3.447e-14	97887552	98541853	NO
Cortical surface area	Temporal	Banks of the Superior Temporal Sulcus	10	118651011	rs2531686	C	G	0.259	78401	-6.227	4.763e-10	118393670	119027998	NO
Cortical surface area	Temporal	Banks of the Superior Temporal Sulcus	12	65817320	rs11175761	C	G	0.6371	78767	8.123	4.543e-16	65505543	66141257	NO
Cortical surface area	Temporal	Banks of the Superior Temporal Sulcus	14	58707253	rs12879675	A	G	0.7171	77863	8.839	9.654e-19	58414909	59104075	NO
Cortical surface area	Temporal	Banks of the Superior Temporal Sulcus	14	59074136	rs160459	A	C	0.5381	78831	-11.913	1.013e-32	58456609	59372445	NO
Cortical surface area	Temporal	Banks of the Superior Temporal Sulcus	14	59628609	rs74826997	T	C	0.8749	78700	-8.246	1.643e-16	59338323	60047373	NO
Cortical surface area	Temporal	Banks of the Superior Temporal Sulcus	14	59638589	rs79218546	T	G	0.7389	77344	7.661	1.851e-14	59241192	60054999	NO
Cortical surface area	Temporal	Banks of the Superior Temporal Sulcus	14	69017843	rs10483812	C	G	0.751	78314	-6.856	7.069e-12	68724410	69287320	NO
Cortical surface area	Temporal	Banks of the Superior Temporal Sulcus	14	99743556	rs113033265	T	TTG	0.5612	48482	6.517	7.154e-11	99493556	99993556	NO
Cortical surface area	Temporal	Banks of the Superior Temporal Sulcus	17	77768654	rs4889891	A	C	0.4914	76986	-6.365	1.958e-10	77518654	78050743	NO
Cortical surface area	Temporal	Banks of the Superior Temporal Sulcus	19	13123750	19:13123750_AG_A	A	AG	0.1524	75176	10.357	3.881e-25	12851196	13467705	NO
Cortical surface area	Temporal	Banks of the Superior Temporal Sulcus	19	13201606	rs113628353	A	G	0.1157	74666	-6.625	3.479e-11	12882215	13463749	NO
Cortical surface area	Temporal	Banks of the Superior Temporal Sulcus	19	32207820	rs2043294	A	T	0.8197	76205	-8.648	5.241e-18	31928927	32458909	NO
Cortical surface area	Temporal	Banks of the Superior Temporal Sulcus	20	52425620	rs6022758	T	C	0.5487	78056	6.282	3.34e-10	52171497	52716100	NO
Cortical surface area	Temporal	Entorhinal	1	178770951	1:178770951_AAGGG_A	A	AAGGG	0.5787	77766	6.37	1.886e-10	178483290	179122779	NO
Cortical surface area	Temporal	Entorhinal	2	18701627	rs4637120	T	C	0.3639	74713	-7.564	3.901e-14	18451627	18988545	NO
Cortical surface area	Temporal	Entorhinal	3	64623633	rs9811467	A	G	0.4368	75661	6.219	4.992e-10	64300295	64875491	NO
Cortical surface area	Temporal	Entorhinal	3	89645542	rs1520596	T	C	0.5973	77652	6.665	2.649e-11	89201721	90089468	NO
Cortical surface area	Temporal	Entorhinal	3	124885175	3:124885175_CTT_C	CTT	C	0.2484	75025	7.204	5.841e-13	124617634	125142656	NO
Cortical surface area	Temporal	Entorhinal	3	190665527	rs2047710	T	C	0.3835	56141	6.614	3.731e-11	190349685	190928743	NO
Cortical surface area	Temporal	Entorhinal	4	73413796	rs11940040	T	C	0.3044	77847	-6.318	2.644e-10	73022712	73801154	NO
Cortical surface area	Temporal	Entorhinal	4	121550384	rs34879215	A	G	0.2429	55755	-6.651	2.902e-11	121296342	121878476	NO
Cortical surface area	Temporal	Entorhinal	5	81866998	rs752021310	CTAAT	C	0.4416	56152	-8.445	3.043e-17	81469570	82155677	NO
Cortical surface area	Temporal	Entorhinal	5	121919189	rs1871170	A	C	0.795	72618	6.497	8.183e-11	121665745	122176708	NO
Cortical surface area	Temporal	Entorhinal	5	148663992	rs352358	A	C	0.651	74539	7.45	9.314e-14	148413446	148914771	NO
Cortical surface area	Temporal	Entorhinal	5	179741981	rs3828687	T	C	0.248	78173	6.667	2.619e-11	179476223	180025888	YES
Cortical surface area	Temporal	Entorhinal	6	92002653	rs9345125	A	G	0.8253	78253	6.753	1.452e-11	91692761	92260245	NO
Cortical surface area	Temporal	Entorhinal	6	126067655	rs3966775	A	C	0.5257	77801	-7.393	1.435e-13	125742553	126372280	NO
Cortical surface area	Temporal	Entorhinal	7	101015507	rs12671249	T	C	0.5141	78264	7.164	7.834e-13	100687051	101344986	NO
Cortical surface area	Temporal	Entorhinal	10	119267704	rs6585437	T	C	0.6985	77876	6.57	5.016e-11	119013864	119543438	NO
Cortical surface area	Temporal	Entorhinal	14	59072226	rs186347	T	G	0.4622	77304	-8.44	3.174e-17	58814730	59342581	NO
Cortical surface area	Temporal	Entorhinal	14	59835972	rs3742647	A	C	0.5535	76705	6.881	5.936e-12	59561665	60111204	NO
Cortical surface area	Temporal	Entorhinal	14	100333150	rs10150279	T	C	0.3045	76696	6.926	4.343e-12	100049473	100644086	NO
Cortical surface area	Temporal	Entorhinal	15	96870817	rs3743462	A	G	0.8477	64596	-6.32	2.61e-10	96620817	97128437	YES
Cortical surface area	Temporal	Entorhinal	16	57579726	rs62036078	A	G	0.5908	77714	6.404	1.513e-10	57317391	57837934	YES
Cortical surface area	Temporal	Entorhinal	16	77320605	rs12921392	A	G	0.3846	78070	8.543	1.304e-17	77022876	77598433	NO
Cortical surface area	Temporal	Entorhinal	17	44076063	rs2471738	T	C	0.2344	55651	11.438	2.689e-30	43633103	45098314	NO
Cortical surface area	Temporal	Entorhinal	17	44119282	rs201261718	A	T	0.0352	43976	6.329	2.465e-10	43869282	44369282	NO
Cortical surface area	Temporal	Entorhinal	17	44330413	rs576322591	A	C	0.0287	46642	6.656	2.812e-11	43712910	44580413	NO
Cortical surface area	Temporal	Entorhinal	17	44628864	rs62073254	T	C	0.4723	37989	7.102	1.228e-12	43962908	44940424	NO
Cortical surface area	Temporal	Entorhinal	17	44703794	rs200750878	T	C	0.9243	39204	-7.468	8.122e-14	44453794	44953794	NO
Cortical surface area	Temporal	Entorhinal	17	44737534	rs155780	T	G	0.946	44288	-6.71	1.94e-11	44159905	44987534	NO
Cortical surface area	Temporal	Entorhinal	20	6388152	20:6388152_CT_C	CT	C	0.3768	49318	6.484	8.917e-11	6121974	6795685	NO
Cortical surface area	Temporal	Entorhinal	20	6516348	rs6085593	T	G	0.7666	77789	-6.221	4.928e-10	6229298	6832516	NO
Cortical surface area	Temporal	Fusiform	1	47974123	rs61784835	T	C	0.3608	78540	8.207	2.266e-16	47724123	48230916	NO
Cortical surface area	Temporal	Fusiform	1	64247206	rs661956	T	C	0.891	79177	7.659	1.868e-14	63919123	64507297	NO
Cortical surface area	Temporal	Fusiform	1	153990946	rs11264873	T	C	0.2962	78382	-6.783	1.174e-11	153510104	154521686	NO
Cortical surface area	Temporal	Fusiform	2	37891758	rs10186013	C	G	0.604	79337	6.376	1.819e-10	37637646	38153370	NO
Cortical surface area	Temporal	Fusiform	3	193516952	rs772098	A	G	0.2764	77611	6.29	3.184e-10	193254630	193777389	NO
Cortical surface area	Temporal	Fusiform	4	53734940	rs10032190	A	C	0.2449	79020	6.512	7.412e-11	53409576	54007835	NO
Cortical surface area	Temporal	Fusiform	4	145655389	rs55817790	A	T	0.4316	55914	-6.162	7.167e-10	145347759	145909064	NO
Cortical surface area	Temporal	Fusiform	5	56082094	rs10940512	C	G	0.7215	79075	8.491	2.052e-17	55740342	56521822	NO
Cortical surface area	Temporal	Fusiform	5	81858749	rs6874844	T	C	0.7514	79342	9.092	9.694e-20	81469570	82155677	NO
Cortical surface area	Temporal	Fusiform	6	7112819	rs6925389	A	G	0.3729	78882	-6.808	9.907e-12	6791700	7418474	NO
Cortical surface area	Temporal	Fusiform	7	43044466	rs2877187	T	C	0.2254	78942	8.032	9.567e-16	42729487	43398877	NO
Cortical surface area	Temporal	Fusiform	7	139252780	rs1638195	T	C	0.3539	63005	6.421	1.355e-10	139002780	139502780	NO
Cortical surface area	Temporal	Fusiform	11	110957809	rs321416	A	C	0.31	79209	8.988	2.524e-19	110695055	111327725	NO
Cortical surface area	Temporal	Fusiform	12	78258579	rs770161	C	G	0.2937	77418	-6.3	2.98e-10	77991285	78509766	NO
Cortical surface area	Temporal	Fusiform	12	106476805	rs12146713	T	C	0.9065	79409	6.34	2.304e-10	106226805	106760413	NO
Cortical surface area	Temporal	Fusiform	12	111835990	rs4375492	A	G	0.789	78909	6.534	6.385e-11	111561604	113156415	NO
Cortical surface area	Temporal	Fusiform	13	80607516	rs55743972	A	G	0.7233	77732	-6.201	5.621e-10	80356751	80871009	NO
Cortical surface area	Temporal	Fusiform	13	81249861	rs36188842	T	G	0.2262	76370	-6.464	1.022e-10	80954099	81881782	NO
Cortical surface area	Temporal	Fusiform	14	59827306	rs17834032	T	C	0.5171	79184	8.167	3.16e-16	59386749	60245450	NO
Cortical surface area	Temporal	Fusiform	16	77327957	rs11640436	T	C	0.5425	78810	-6.888	5.671e-12	77032898	77585405	NO
Cortical surface area	Temporal	Fusiform	17	19888501	rs9901294	A	G	0.2901	79275	6.396	1.591e-10	19547869	20257567	NO
Cortical surface area	Temporal	Fusiform	17	43604278	rs28442065	A	G	0.0394	45284	-6.806	1.004e-11	43354278	43854278	NO
Cortical surface area	Temporal	Fusiform	17	43672331	rs1724418	T	G	0.9584	43459	6.926	4.34e-12	43422331	43922331	NO
Cortical surface area	Temporal	Fusiform	17	43677790	rs2693338	T	C	0.95	43272	7.621	2.516e-14	43427790	43927790	NO
Cortical surface area	Temporal	Fusiform	17	43696532	rs371456541	A	G	0.9693	45230	6.24	4.364e-10	43446532	43946532	NO
Cortical surface area	Temporal	Fusiform	17	43849415	rs79730878	T	C	0.774	75159	13.468	2.401e-41	43149058	45124453	NO
Cortical surface area	Temporal	Fusiform	17	43992839	17:43992839_TG_T	T	TG	0.0304	47147	-6.669	2.58e-11	43742839	44242839	NO
Cortical surface area	Temporal	Fusiform	17	44097378	rs751006572	A	AC	0.0356	45485	-6.302	2.942e-10	43847378	44347378	NO
Cortical surface area	Temporal	Fusiform	17	44281544	rs111575592	T	C	0.0403	48074	-6.599	4.132e-11	43985989	44531544	NO
Cortical surface area	Temporal	Fusiform	17	44362049	rs560470249	T	TA	0.893	48377	7.233	4.732e-13	44069971	44612049	NO
Cortical surface area	Temporal	Fusiform	17	44819595	rs17698176	T	G	0.7746	72377	-7.02	2.224e-12	43703502	45083217	NO
Cortical surface area	Temporal	Fusiform	17	70295728	rs7211132	T	G	0.5368	79005	-6.269	3.643e-10	70032690	70549163	YES
Cortical surface area	Temporal	Inferior Temporal	1	68595271	1:68595271_CTA_C	CTA	C	0.9122	77479	-7.266	3.69e-13	68331947	68881522	NO
Cortical surface area	Temporal	Inferior Temporal	1	86645228	rs1336056	A	G	0.3533	78988	8.774	1.722e-18	86323546	86935846	NO
Cortical surface area	Temporal	Inferior Temporal	1	113242488	rs3013431	T	C	0.6087	79282	-6.585	4.549e-11	112989478	113492488	NO
Cortical surface area	Temporal	Inferior Temporal	2	4536824	rs595795	T	C	0.623	77936	6.614	3.739e-11	4274510	4788515	NO
Cortical surface area	Temporal	Inferior Temporal	2	4562203	2:4562203_TACC_T	T	TACC	0.1838	77507	7.232	4.744e-13	4261132	4828135	NO
Cortical surface area	Temporal	Inferior Temporal	2	6601502	rs753724993	CTT	C	0.5695	78881	-6.293	3.105e-10	6344534	6884218	YES
Cortical surface area	Temporal	Inferior Temporal	2	37899310	rs9309013	A	G	0.3419	74536	-8.747	2.185e-18	37637646	38169768	NO
Cortical surface area	Temporal	Inferior Temporal	3	89521693	rs35124509	T	C	0.6037	79451	6.901	5.165e-12	89201721	90001353	NO
Cortical surface area	Temporal	Inferior Temporal	3	150197676	rs9843097	T	C	0.2357	78711	-6.236	4.484e-10	149862041	150454096	YES
Cortical surface area	Temporal	Inferior Temporal	4	127969219	rs340440	T	G	0.8413	79308	7.013	2.338e-12	127523649	128352789	NO
Cortical surface area	Temporal	Inferior Temporal	5	92012438	rs972727	A	G	0.8544	79451	-6.391	1.653e-10	91749005	92262438	NO
Cortical surface area	Temporal	Inferior Temporal	5	92989489	rs17083278	A	C	0.8581	79086	-8.535	1.401e-17	92439558	93896956	NO
Cortical surface area	Temporal	Inferior Temporal	5	106911087	rs35433400	T	C	0.2674	78059	-7.707	1.284e-14	106659839	107305609	NO
Cortical surface area	Temporal	Inferior Temporal	5	107308489	rs35575289	T	C	0.8812	79262	6.19	6.032e-10	107048384	107592556	NO
Cortical surface area	Temporal	Inferior Temporal	6	126964510	rs4273712	A	G	0.732	78829	6.367	1.922e-10	126542095	127318983	NO
Cortical surface area	Temporal	Inferior Temporal	10	119267704	rs6585437	T	C	0.6986	79027	6.846	7.6e-12	118993364	119567033	NO
Cortical surface area	Temporal	Inferior Temporal	11	92460611	rs34774306	T	TA	0.6748	78844	7.544	4.574e-14	92067858	92808342	NO
Cortical surface area	Temporal	Inferior Temporal	12	27788021	rs2075378	A	G	0.3507	79211	-6.791	1.113e-11	27523311	28043975	NO
Cortical surface area	Temporal	Inferior Temporal	12	65798921	rs7315978	T	C	0.3639	79401	-7.14	9.344e-13	65505543	66092258	NO
Cortical surface area	Temporal	Inferior Temporal	12	106970892	rs10861634	T	C	0.1425	79229	-6.165	7.027e-10	106711553	107538513	NO
Cortical surface area	Temporal	Inferior Temporal	14	59072144	rs10782438	T	C	0.5747	78497	8.817	1.176e-18	58634861	59345285	NO
Cortical surface area	Temporal	Inferior Temporal	14	59654649	rs4901906	T	C	0.1214	78922	7.8	6.208e-15	59202616	59941746	NO
Cortical surface area	Temporal	Inferior Temporal	15	39370567	rs7165302	A	G	0.4644	78326	6.34	2.294e-10	39105860	39647761	NO
Cortical surface area	Temporal	Inferior Temporal	15	39809640	rs115241741	A	C	0.0471	74086	7.599	2.99e-14	39559640	40389187	NO
Cortical surface area	Temporal	Inferior Temporal	15	39989619	rs2631694	A	G	0.2495	79451	6.339	2.311e-10	39730728	40275544	NO
Cortical surface area	Temporal	Inferior Temporal	19	13123750	19:13123750_AG_A	A	AG	0.1525	75520	8.609	7.387e-18	12859763	13415884	NO
Cortical surface area	Temporal	Inferior Temporal	22	43786553	rs2144415	A	T	0.885	79464	-6.273	3.548e-10	43469439	44073413	NO
Cortical surface area	Temporal	Inferior Temporal	22	43959182	rs73172039	A	G	0.8498	79195	-6.56	5.396e-11	43668457	44266347	NO
Cortical surface area	Temporal	Insula	1	205164254	rs144224664	CA	C	0.4381	74268	7.552	4.294e-14	204789288	205518803	NO
Cortical surface area	Temporal	Insula	2	32499150	rs449348	A	G	0.6539	79206	6.351	2.135e-10	32249150	33061909	NO
Cortical surface area	Temporal	Insula	2	33060719	rs6731130	T	C	0.5866	79439	6.814	9.523e-12	32765346	33373701	NO
Cortical surface area	Temporal	Insula	2	48323919	rs6720027	T	C	0.4067	78712	6.983	2.887e-12	47927487	48574044	NO
Cortical surface area	Temporal	Insula	3	104662433	rs13318870	T	C	0.4836	79277	-6.334	2.388e-10	104397183	104963881	NO
Cortical surface area	Temporal	Insula	4	187381563	rs57039165	T	C	0.1562	79527	6.326	2.521e-10	187124398	187640680	NO
Cortical surface area	Temporal	Insula	5	82848581	rs309593	A	G	0.2037	79457	9.378	6.704e-21	82560082	83107040	NO
Cortical surface area	Temporal	Insula	6	92002913	rs9351259	A	G	0.1758	79518	-6.262	3.794e-10	91752569	92260245	NO
Cortical surface area	Temporal	Insula	6	97753223	rs13209872	C	G	0.3423	78967	-6.493	8.412e-11	97502104	98197755	NO
Cortical surface area	Temporal	Insula	6	98585502	rs17814604	A	G	0.7134	79139	7.122	1.065e-12	98148142	98841622	NO
Cortical surface area	Temporal	Insula	6	127096527	rs983741	A	C	0.2345	78998	9.369	7.341e-21	126363946	127530279	NO
Cortical surface area	Temporal	Insula	6	127369230	rs139849708	T	C	0.9711	69784	-6.274	3.518e-10	127119230	127619230	NO
Cortical surface area	Temporal	Insula	7	2760338	rs798551	A	T	0.7125	78464	6.588	4.453e-11	2502152	3150309	NO
Cortical surface area	Temporal	Insula	8	78179919	rs7010036	T	C	0.7928	79543	6.256	3.955e-10	77844579	78430278	NO
Cortical surface area	Temporal	Insula	8	120596023	rs10283100	A	G	0.0557	72440	-7.009	2.399e-12	120346023	120846023	NO
Cortical surface area	Temporal	Insula	8	120597417	rs1992721	A	G	0.7159	79565	8.388	4.963e-17	119978181	120959099	NO
Cortical surface area	Temporal	Insula	10	105454043	rs2863994	T	G	0.5236	73576	6.782	1.181e-11	105153300	105709834	NO
Cortical surface area	Temporal	Insula	10	118676964	rs4638225	A	G	0.2494	78913	8.543	1.307e-17	118363930	119136338	NO
Cortical surface area	Temporal	Insula	11	111025039	rs34077344	A	T	0.0476	79321	8.081	6.45e-16	110741189	111275039	NO
Cortical surface area	Temporal	Insula	11	111037249	rs516110	T	G	0.2107	79448	-7.07	1.548e-12	110695055	111290690	NO
Cortical surface area	Temporal	Insula	11	111072779	rs949279	A	G	0.3289	78940	8.921	4.611e-19	110695939	111333785	NO
Cortical surface area	Temporal	Insula	12	106476805	rs12146713	T	C	0.9065	79565	6.765	1.337e-11	106193251	106760413	NO
Cortical surface area	Temporal	Insula	14	100325465	rs4905906	T	G	0.3063	77716	-6.452	1.105e-10	100075039	100660206	NO
Cortical surface area	Temporal	Insula	15	58300768	rs4646597	A	G	0.5458	79131	8.04	9.01e-16	57939012	58659072	NO
Cortical surface area	Temporal	Insula	16	69177268	rs2288036	T	C	0.0569	79549	6.274	3.514e-10	68890117	69669394	NO
Cortical surface area	Temporal	Insula	17	28410124	rs12941382	T	C	0.483	79310	-10.261	1.061e-24	27647490	28977837	NO
Cortical surface area	Temporal	Insula	17	42290015	rs2855818	A	G	0.245	77758	-6.618	3.641e-11	41907739	42551922	NO
Cortical surface area	Temporal	Middle Temporal	1	86653341	rs10873761	T	C	0.6532	78703	-9.261	2.016e-20	86323546	86963521	NO
Cortical surface area	Temporal	Middle Temporal	1	88225813	rs305418	T	G	0.8675	78222	-6.326	2.513e-10	87946463	88479973	NO
Cortical surface area	Temporal	Middle Temporal	1	234747854	rs1410873	C	G	0.2761	78196	-6.219	4.993e-10	234488338	235012074	YES
Cortical surface area	Temporal	Middle Temporal	2	3421168	rs10187625	A	G	0.4025	78798	-7.505	6.144e-14	3142075	3704566	NO
Cortical surface area	Temporal	Middle Temporal	2	4550112	rs769344141	CTG	C	0.7969	77885	-9.936	2.889e-23	4251998	4829292	NO
Cortical surface area	Temporal	Middle Temporal	2	27171245	rs10181727	T	C	0.3737	78491	6.446	1.151e-10	26876027	27595484	NO
Cortical surface area	Temporal	Middle Temporal	2	37095397	rs34989109	G	GA	0.4546	56618	6.789	1.129e-11	36798883	37439296	NO
Cortical surface area	Temporal	Middle Temporal	2	54615325	rs79272390	T	C	0.1564	76458	-8.613	7.088e-18	54365325	54865325	NO
Cortical surface area	Temporal	Middle Temporal	2	237702992	rs35016565	T	G	0.6746	77515	-7.118	1.091e-12	237452992	237965664	NO
Cortical surface area	Temporal	Middle Temporal	3	52810933	rs2098167	A	T	0.6321	72093	8.328	8.227e-17	51964640	53143465	NO
Cortical surface area	Temporal	Middle Temporal	3	52848207	rs77347777	T	C	0.1172	74978	6.263	3.765e-10	52598207	53098207	NO
Cortical surface area	Temporal	Middle Temporal	3	104667887	rs73187663	A	C	0.5219	77909	8.205	2.307e-16	104396849	105073323	NO
Cortical surface area	Temporal	Middle Temporal	3	118995379	rs16829649	A	G	0.8905	78767	-8.163	3.267e-16	118658226	119309724	NO
Cortical surface area	Temporal	Middle Temporal	3	119045617	rs7612159	A	G	0.4305	78633	-6.162	7.178e-10	118741937	119296533	NO
Cortical surface area	Temporal	Middle Temporal	3	168892763	rs34737522	CT	C	0.1456	76397	6.945	3.794e-12	168381225	169226021	YES
Cortical surface area	Temporal	Middle Temporal	3	177316085	rs4241484	A	C	0.5878	76585	10.101	5.488e-24	177021340	177595126	NO
Cortical surface area	Temporal	Middle Temporal	4	1731653	rs798764	T	C	0.8046	78364	-7.157	8.272e-13	1435137	2013393	NO
Cortical surface area	Temporal	Middle Temporal	4	97950728	rs17247838	T	G	0.9567	78212	6.165	7.062e-10	97635555	98653698	YES
Cortical surface area	Temporal	Middle Temporal	5	92186059	rs888812	T	C	0.5087	78844	-6.5	8.033e-11	91932752	92509652	NO
Cortical surface area	Temporal	Middle Temporal	5	92631897	rs529002648	C	G	0.994	51275	7.169	7.528e-13	92381897	92881897	NO
Cortical surface area	Temporal	Middle Temporal	5	92872910	5:92872910_GA_G	G	GA	0.0466	72570	-11.192	4.445e-29	92433607	93820731	NO
Cortical surface area	Temporal	Middle Temporal	5	92979389	rs56259161	A	G	0.8578	78634	-10.775	4.54e-27	92494850	93950094	NO
Cortical surface area	Temporal	Middle Temporal	5	94032216	rs116799274	A	C	0.9575	78375	-6.253	4.031e-10	93314643	94559567	NO
Cortical surface area	Temporal	Middle Temporal	5	107301273	rs13174010	T	C	0.8866	78402	6.555	5.578e-11	107033743	107592556	NO
Cortical surface area	Temporal	Middle Temporal	6	31677391	rs9267549	A	G	0.1283	78446	-7.049	1.805e-12	30491366	33049845	NO
Cortical surface area	Temporal	Middle Temporal	6	44041400	rs72867280	A	G	0.2436	77712	7.538	4.762e-14	43786629	44291400	NO
Cortical surface area	Temporal	Middle Temporal	6	126964510	rs4273712	A	G	0.732	78286	9.817	9.509e-23	126542095	127628777	NO
Cortical surface area	Temporal	Middle Temporal	6	127105087	rs2021356	A	G	0.4282	77815	7.668	1.749e-14	126850379	127496737	NO
Cortical surface area	Temporal	Middle Temporal	6	127176330	rs77598707	T	C	0.0389	73765	8.95	3.55e-19	126363946	127619230	NO
Cortical surface area	Temporal	Middle Temporal	7	33258803	rs28435377	T	C	0.3316	78635	-6.885	5.792e-12	32904447	33761631	NO
Cortical surface area	Temporal	Middle Temporal	8	93212850	rs1444497	A	G	0.4233	78099	7.798	6.293e-15	92937902	93501556	NO
Cortical surface area	Temporal	Middle Temporal	9	13231634	rs1330129	T	C	0.4301	77847	-7.745	9.559e-15	12842603	13528943	NO
Cortical surface area	Temporal	Middle Temporal	9	98194761	rs80321314	A	G	0.083	78915	9.077	1.116e-19	97887552	98564415	NO
Cortical surface area	Temporal	Middle Temporal	10	114810240	rs12265291	T	C	0.5332	78423	-6.844	7.686e-12	114496580	115073426	NO
Cortical surface area	Temporal	Middle Temporal	11	30602281	rs7124942	C	G	0.8343	78074	-7.178	7.079e-13	30332806	30856936	NO
Cortical surface area	Temporal	Middle Temporal	11	92326352	11:92326352_AT_A	A	AT	0.3349	76798	-7.837	4.606e-15	92067858	92808342	NO
Cortical surface area	Temporal	Middle Temporal	12	65830349	rs9783497	A	G	0.3627	78844	-6.189	6.07e-10	65512058	66085548	NO
Cortical surface area	Temporal	Middle Temporal	12	107004723	rs10861637	A	G	0.7393	78203	6.819	9.141e-12	106567949	107397542	NO
Cortical surface area	Temporal	Middle Temporal	14	59628609	rs74826997	T	C	0.875	78784	-8.385	5.066e-17	59335670	60055480	NO
Cortical surface area	Temporal	Middle Temporal	14	81668707	rs9806027	C	G	0.5529	78562	6.536	6.337e-11	81385888	81987076	YES
Cortical surface area	Temporal	Middle Temporal	14	94844947	rs28929474	T	C	0.0201	76393	6.483	8.978e-11	94588142	95113636	NO
Cortical surface area	Temporal	Middle Temporal	15	56111324	rs933997	T	C	0.0982	79217	8.098	5.569e-16	55836125	56571602	NO
Cortical surface area	Temporal	Middle Temporal	16	30120372	rs56079926	T	C	0.348	73227	6.46	1.044e-10	29853160	30593843	NO
Cortical surface area	Temporal	Middle Temporal	17	43915497	rs62054807	T	C	0.2898	76154	6.417	1.389e-10	43213493	45115498	NO
Cortical surface area	Temporal	Middle Temporal	17	44294476	17:44294476_CAA_C	CAA	C	0.1872	37997	-7.859	3.871e-15	44044476	44544476	NO
Cortical surface area	Temporal	Middle Temporal	17	44819595	rs17698176	T	G	0.7744	72167	9.243	2.395e-20	43403732	45098314	NO
Cortical surface area	Temporal	Middle Temporal	17	66095906	rs62084755	A	G	0.2138	73191	7.261	3.852e-13	65564382	66395151	NO
Cortical surface area	Temporal	Middle Temporal	18	40261607	rs9951863	T	C	0.7418	76100	7.209	5.64e-13	39949690	40599808	NO
Cortical surface area	Temporal	Middle Temporal	19	13109955	rs73006822	T	C	0.1503	75887	11.689	1.444e-31	12784122	13467705	NO
Cortical surface area	Temporal	Middle Temporal	19	13173850	rs75460821	T	C	0.8885	75482	6.729	1.704e-11	12889616	13463749	NO
Cortical surface area	Temporal	Middle Temporal	19	13239140	rs740561	A	G	0.2514	76407	-6.267	3.671e-10	12978695	13509018	NO
Cortical surface area	Temporal	Middle Temporal	19	32204489	rs117623407	A	G	0.8503	77434	-8.177	2.922e-16	31928927	32458909	NO
Cortical surface area	Temporal	Middle Temporal	19	50097932	rs16981329	C	G	0.2324	78891	6.187	6.126e-10	49809718	50353252	NO
Cortical surface area	Temporal	Middle Temporal	20	52448936	rs6097618	C	G	0.4446	56273	-7.916	2.449e-15	52161926	52721667	NO
Cortical surface area	Temporal	Middle Temporal	22	43823413	rs4822290	T	C	0.5751	77533	-7.121	1.074e-12	43518311	44097779	NO
Cortical surface area	Temporal	Middle Temporal	22	43901995	rs75641854	C	G	0.618	78027	6.317	2.668e-10	43648108	44160839	NO
Cortical surface area	Temporal	Middle Temporal	22	43959182	rs73172039	A	G	0.8499	78659	-6.985	2.846e-12	43661999	44266347	NO
Cortical surface area	Temporal	Parahippocampal	1	47974123	rs61784835	T	C	0.3612	76643	7.533	4.953e-14	47690080	48230916	NO
Cortical surface area	Temporal	Parahippocampal	1	119535334	rs10923715	A	T	0.4446	76824	-6.341	2.279e-10	119254361	119833854	NO
Cortical surface area	Temporal	Parahippocampal	2	134358313	rs10209819	T	C	0.4916	76227	-6.282	3.338e-10	134108313	134610343	NO
Cortical surface area	Temporal	Parahippocampal	2	199522858	rs9973442	A	C	0.4339	75464	-6.828	8.588e-12	199247285	199834179	YES
Cortical surface area	Temporal	Parahippocampal	3	64561045	rs3935273	T	C	0.4888	76701	6.39	1.663e-10	64291669	64830653	NO
Cortical surface area	Temporal	Parahippocampal	4	20121121	rs13150272	A	G	0.2767	77239	-7.787	6.849e-15	19838468	20454557	NO
Cortical surface area	Temporal	Parahippocampal	5	124064149	rs12519678	A	G	0.8457	77512	6.247	4.187e-10	123793244	124332553	NO
Cortical surface area	Temporal	Parahippocampal	6	109000742	rs4946935	A	G	0.2899	76860	-6.932	4.156e-12	108611264	109268859	NO
Cortical surface area	Temporal	Parahippocampal	6	126868567	rs58321169	T	C	0.2717	76125	-7.466	8.276e-14	126542095	127458251	NO
Cortical surface area	Temporal	Parahippocampal	7	21584301	rs200890809	A	AT	0.5001	56873	-8.516	1.655e-17	21309040	21890361	NO
Cortical surface area	Temporal	Parahippocampal	8	28326567	rs11782292	A	T	0.2644	76112	7.713	1.227e-14	28074910	28593234	NO
Cortical surface area	Temporal	Parahippocampal	8	28380982	rs13264393	T	C	0.7743	70217	-6.392	1.641e-10	28105105	28686187	NO
Cortical surface area	Temporal	Parahippocampal	8	93199037	rs7838999	A	G	0.4249	77005	11.261	2.043e-29	92934065	93601761	NO
Cortical surface area	Temporal	Parahippocampal	9	18075847	rs1329919	T	G	0.4667	76761	-8.613	7.093e-18	17755658	18359562	NO
Cortical surface area	Temporal	Parahippocampal	9	98200944	rs60608001	A	G	0.0857	76824	6.27	3.614e-10	97887552	98505103	NO
Cortical surface area	Temporal	Parahippocampal	9	119344170	9:119344170_TCTTTAA_T	T	TCTTTAA	0.1471	76955	-6.369	1.898e-10	118993634	119729868	NO
Cortical surface area	Temporal	Parahippocampal	9	129441754	rs10987404	C	G	0.3062	77163	6.255	3.979e-10	129191754	129710396	NO
Cortical surface area	Temporal	Parahippocampal	11	47669175	rs59360790	T	C	0.5966	77317	6.223	4.884e-10	47277052	47919861	NO
Cortical surface area	Temporal	Parahippocampal	11	92510897	rs3847528	A	G	0.3284	76114	7.462	8.551e-14	92021095	92808342	NO
Cortical surface area	Temporal	Parahippocampal	11	111072779	rs949279	A	G	0.3293	76887	-6.743	1.553e-11	110818461	111327725	NO
Cortical surface area	Temporal	Parahippocampal	12	65787410	12:65787410_CAAAA_C	CAAAA	C	0.3248	50848	6.402	1.534e-10	65537410	66090519	NO
Cortical surface area	Temporal	Parahippocampal	12	117338504	rs12302173	A	G	0.0726	76986	6.895	5.402e-12	117037112	117588504	NO
Cortical surface area	Temporal	Parahippocampal	15	98433411	rs9783704	A	G	0.6176	77034	-7.425	1.125e-13	98181818	98696866	NO
Cortical surface area	Temporal	Parahippocampal	17	44116843	rs16940845	A	C	0.3933	57026	6.312	2.75e-10	43781596	44615490	NO
Cortical surface area	Temporal	Parahippocampal	22	43740770	rs5759292	T	C	0.8162	76966	-6.247	4.194e-10	43465848	43990770	NO
Cortical surface area	Temporal	Parahippocampal	22	43788830	rs5996329	C	G	0.3678	76026	6.441	1.189e-10	43476509	44056954	NO
Cortical surface area	Temporal	Parahippocampal	22	43959182	rs73172039	A	G	0.8499	77256	-7.072	1.529e-12	43668457	44411976	NO
Cortical surface area	Temporal	Superior Temporal	1	22432419	rs4655022	T	C	0.2359	78388	6.995	2.65e-12	22103327	22732530	NO
Cortical surface area	Temporal	Superior Temporal	1	26754875	rs200686814	A	AC	0.7579	73229	6.966	3.267e-12	26502129	27133511	NO
Cortical surface area	Temporal	Superior Temporal	1	64643277	rs7527017	T	C	0.3305	76717	-8.445	3.042e-17	64356983	64915960	NO
Cortical surface area	Temporal	Superior Temporal	1	103602896	rs12078066	T	C	0.7064	72590	-6.48	9.198e-11	103154201	103901627	NO
Cortical surface area	Temporal	Superior Temporal	2	48277490	rs7601767	A	G	0.3789	78234	9.856	6.455e-23	47927487	48916338	NO
Cortical surface area	Temporal	Superior Temporal	2	149994571	rs13011264	A	G	0.7146	78340	-9.727	2.324e-22	149690486	150334200	NO
Cortical surface area	Temporal	Superior Temporal	2	150010182	rs112994464	A	G	0.1567	78294	-6.557	5.494e-11	149735960	150271138	NO
Cortical surface area	Temporal	Superior Temporal	2	162868858	rs1014444	A	G	0.6617	77567	-6.852	7.257e-12	162547621	163158664	NO
Cortical surface area	Temporal	Superior Temporal	3	48768680	rs6799186	T	C	0.4935	76695	6.825	8.769e-12	48517877	49606574	NO
Cortical surface area	Temporal	Superior Temporal	3	49726178	rs147997200	A	G	0.0877	74857	6.22	4.958e-10	48320686	50150350	NO
Cortical surface area	Temporal	Superior Temporal	3	177341751	3:177341751_AT_A	A	AT	0.5985	75493	6.452	1.101e-10	177044781	177595126	NO
Cortical surface area	Temporal	Superior Temporal	3	190663557	rs35055419	T	C	0.6232	75769	6.524	6.837e-11	190379975	190928480	NO
Cortical surface area	Temporal	Superior Temporal	4	119281608	rs72670213	T	G	0.0868	78355	-7.458	8.786e-14	118738617	119673697	NO
Cortical surface area	Temporal	Superior Temporal	4	157688270	rs78525462	T	C	0.9206	77963	-6.384	1.72e-10	157361157	158065887	NO
Cortical surface area	Temporal	Superior Temporal	4	177761373	rs4690467	C	G	0.7503	77826	7.445	9.696e-14	177504913	178091550	YES
Cortical surface area	Temporal	Superior Temporal	6	7118990	rs11755724	A	G	0.3648	78474	7.837	4.603e-15	6791700	7488069	NO
Cortical surface area	Temporal	Superior Temporal	7	18897323	rs12699996	T	G	0.5912	76476	6.353	2.11e-10	18627408	19173575	NO
Cortical surface area	Temporal	Superior Temporal	7	69822972	rs2866278	A	G	0.1676	66650	-6.363	1.983e-10	69020649	70072972	NO
Cortical surface area	Temporal	Superior Temporal	8	8566965	rs386721993	CTTTTTTT	C	0.1572	42404	-6.289	3.186e-10	8300255	8909454	NO
Cortical surface area	Temporal	Superior Temporal	8	9106638	rs17149626	A	G	0.1717	78474	-6.239	4.409e-10	8856638	9378205	NO
Cortical surface area	Temporal	Superior Temporal	8	9286347	rs9772510	T	C	0.3899	78101	-6.32	2.61e-10	9026243	9635828	NO
Cortical surface area	Temporal	Superior Temporal	8	9959956	rs12550244	A	G	0.2441	78305	-6.92	4.529e-12	9032856	10304928	NO
Cortical surface area	Temporal	Superior Temporal	8	10151141	rs55743011	T	C	0.2794	73759	7.277	3.426e-13	9880494	10590499	NO
Cortical surface area	Temporal	Superior Temporal	8	10266706	rs12550717	A	G	0.3706	77768	-10.956	6.242e-28	7838230	12172801	NO
Cortical surface area	Temporal	Superior Temporal	8	120587502	rs976423	A	T	0.2304	77986	-6.24	4.368e-10	120331643	120888194	NO
Cortical surface area	Temporal	Superior Temporal	11	130446644	rs12363913	T	G	0.5372	78071	-6.407	1.48e-10	130196023	130750533	NO
Cortical surface area	Temporal	Superior Temporal	15	39721681	rs62005271	T	C	0.1525	77507	6.215	5.126e-10	39471681	40069219	NO
Cortical surface area	Temporal	Superior Temporal	15	39722572	rs4533261	C	G	0.6627	78108	7.242	4.415e-13	39427303	40284756	NO
Cortical surface area	Temporal	Superior Temporal	15	39809640	rs115241741	A	C	0.0471	73121	-7.408	1.283e-13	39559640	40059640	NO
Cortical surface area	Temporal	Superior Temporal	16	86710660	rs10048146	A	G	0.8103	78474	6.166	6.985e-10	86459731	86964715	NO
Cortical surface area	Temporal	Superior Temporal	16	89704365	rs1126464	C	G	0.2415	75575	-6.601	4.082e-11	89454365	89954365	NO
Cortical surface area	Temporal	Superior Temporal	17	46857487	rs575556	A	C	0.3484	78454	6.446	1.15e-10	46585629	47310322	NO
Cortical surface area	Temporal	Superior Temporal	18	334742	rs2305027	T	C	0.4945	72835	6.354	2.095e-10	84742	585675	NO
Cortical surface area	Temporal	Superior Temporal	19	13108622	rs4926172	T	C	0.4639	77240	6.451	1.114e-10	12851196	13364434	NO
Cortical surface area	Temporal	Superior Temporal	19	13934296	rs76549352	A	G	0.9619	57026	-9.382	6.482e-21	13636994	14221519	NO
Cortical surface area	Temporal	Superior Temporal	19	32207820	rs2043294	A	T	0.8196	75896	-6.797	1.065e-11	31950518	32465509	NO
Cortical surface area	Temporal	Transverse Temporal	1	208424176	rs1781032	T	C	0.4483	74109	6.409	1.468e-10	208166721	208707259	NO
Cortical surface area	Temporal	Transverse Temporal	2	48343339	rs7605361	A	G	0.6045	78898	7.226	4.961e-13	47961188	48734467	NO
Cortical surface area	Temporal	Transverse Temporal	2	149994571	rs13011264	A	G	0.7144	79716	-13.604	3.8e-42	149680754	150334915	NO
Cortical surface area	Temporal	Transverse Temporal	2	150020578	rs75139489	C	G	0.8433	79268	7.362	1.808e-13	149735960	150408439	NO
Cortical surface area	Temporal	Transverse Temporal	3	77268282	rs12635214	A	G	0.4461	78941	-6.395	1.605e-10	76924700	77522655	NO
Cortical surface area	Temporal	Transverse Temporal	3	150197838	rs4488863	T	C	0.287	78418	-6.222	4.913e-10	149885186	150447838	YES
Cortical surface area	Temporal	Transverse Temporal	4	160046910	4:160046910_GA_G	G	GA	0.3886	48956	-6.751	1.464e-11	159732236	160591752	YES
Cortical surface area	Temporal	Transverse Temporal	5	9544544	rs422722	T	C	0.6064	79850	-6.409	1.463e-10	9294544	9805927	NO
Cortical surface area	Temporal	Transverse Temporal	5	92797041	5:92797041_TG_T	T	TG	0.0469	72602	9.251	2.215e-20	92433607	93820731	NO
Cortical surface area	Temporal	Transverse Temporal	5	92976340	rs74592586	A	G	0.1668	79645	-6.346	2.205e-10	92682305	93243473	NO
Cortical surface area	Temporal	Transverse Temporal	5	93906115	rs62365668	A	G	0.5335	79666	-7.018	2.248e-12	93582263	94237532	NO
Cortical surface area	Temporal	Transverse Temporal	6	92002913	rs9351259	A	G	0.1756	79803	-9.871	5.568e-23	91640213	92266259	NO
Cortical surface area	Temporal	Transverse Temporal	8	9408978	rs4840426	T	G	0.3616	79018	-7.033	2.017e-12	8058044	11232051	NO
Cortical surface area	Temporal	Transverse Temporal	8	108414413	rs1283691	T	C	0.4194	79692	6.398	1.577e-10	108143785	108700114	NO
Cortical surface area	Temporal	Transverse Temporal	8	120624092	rs7012371	A	G	0.2426	79608	-6.92	4.507e-12	120331643	120888194	NO
Cortical surface area	Temporal	Transverse Temporal	8	145026582	rs62523994	A	G	0.4002	78873	6.402	1.532e-10	144739462	145311829	YES
Cortical surface area	Temporal	Transverse Temporal	9	101636447	rs4465026	C	G	0.6968	79177	6.306	2.869e-10	101354353	101923848	NO
Cortical surface area	Temporal	Transverse Temporal	10	104636655	rs3740393	C	G	0.1424	79613	-6.913	4.752e-12	104386655	105202499	NO
Cortical surface area	Temporal	Transverse Temporal	11	111005245	rs73019218	T	C	0.8418	79687	6.863	6.741e-12	110695055	111338021	NO
Cortical surface area	Temporal	Transverse Temporal	11	111072779	rs949279	A	G	0.3291	79225	6.204	5.495e-10	110800526	111327725	NO
Cortical surface area	Temporal	Transverse Temporal	13	47267492	rs9526218	C	G	0.2706	78910	6.181	6.35e-10	46904966	47520592	NO
Cortical surface area	Temporal	Transverse Temporal	13	107704349	rs9520280	T	C	0.33	78949	6.601	4.071e-11	107434072	108003863	NO
Cortical surface area	Temporal	Transverse Temporal	14	59074136	rs160459	A	C	0.5381	79850	7.834	4.735e-15	58814739	59342075	NO
Cortical surface area	Temporal	Transverse Temporal	15	39661138	rs4566132	A	G	0.9334	77731	6.961	3.376e-12	39381771	39914000	NO
Cortical surface area	Temporal	Transverse Temporal	15	39772092	rs746243916	A	AAT	0.1224	78985	-7.366	1.758e-13	39427303	40045475	NO
Cortical surface area	Temporal	Transverse Temporal	15	39819219	rs12438058	T	C	0.805	78424	-6.186	6.19e-10	39471681	40145648	NO
Cortical surface area	Temporal	Transverse Temporal	19	13934296	rs76549352	A	G	0.9619	57026	-7.769	7.915e-15	13636994	14220873	NO
Cortical surface area	Temporal	Transverse Temporal	22	46760481	rs9615351	C	G	0.7523	74583	-7.286	3.199e-13	46472256	47012214	NO
Cortical thickness	Frontal	Caudal Anterior Cingulate	8	101681138	rs76997968	A	G	0.3696	50989	7.16	8.092e-13	101423265	101936570	NO
Cortical thickness	Frontal	Caudal Anterior Cingulate	8	120920025	8:120920025_CA_C	CA	C	0.2447	52204	6.279	3.408e-10	120655261	121292765	NO
Cortical thickness	Frontal	Caudal Anterior Cingulate	10	14681979	rs10906725	A	G	0.5318	79255	-6.747	1.508e-11	14412638	14947137	NO
Cortical thickness	Frontal	Caudal Anterior Cingulate	10	118693862	rs11598817	A	G	0.7462	79220	6.918	4.593e-12	118363930	119146664	NO
Cortical thickness	Frontal	Caudal Middle Frontal	1	58546624	rs12760204	T	C	0.8237	79211	8.363	6.129e-17	58287919	58912391	NO
Cortical thickness	Frontal	Caudal Middle Frontal	3	147137674	rs73004648	A	G	0.8761	79619	6.167	6.979e-10	146846847	147517609	NO
Cortical thickness	Frontal	Caudal Middle Frontal	4	103188709	rs13107325	T	C	0.0707	79856	9.812	9.98e-23	102452364	103638441	NO
Cortical thickness	Frontal	Caudal Middle Frontal	9	119273819	rs4837580	T	C	0.3879	78991	6.257	3.919e-10	118995183	119558184	NO
Cortical thickness	Frontal	Caudal Middle Frontal	12	28714453	rs11049715	A	G	0.716	79045	-7.011	2.372e-12	27985596	28990649	NO
Cortical thickness	Frontal	Caudal Middle Frontal	19	13123750	19:13123750_AG_A	A	AG	0.1525	75870	-6.444	1.161e-10	12859763	13373750	NO
Cortical thickness	Frontal	Frontal Pole	1	47980916	rs6658111	T	G	0.6337	79072	6.231	4.645e-10	47724123	48230916	NO
Cortical thickness	Frontal	Frontal Pole	16	87229344	rs56023709	A	C	0.3837	79467	11.704	1.213e-31	86952428	87581146	NO
Cortical thickness	Frontal	Lateral Orbitofrontal	1	215139887	rs1452628	A	T	0.6242	78910	8.244	1.669e-16	214885752	215404797	NO
Cortical thickness	Frontal	Lateral Orbitofrontal	6	126835655	rs1490388	T	C	0.4578	79013	-7.064	1.618e-12	126409043	127330700	NO
Cortical thickness	Frontal	Lateral Orbitofrontal	22	38140352	rs4239889	T	G	0.7068	79226	6.921	4.494e-12	37853545	38513663	NO
Cortical thickness	Frontal	Medial Orbitofrontal	5	82860499	5:82860499_TG_T	T	TG	0.1902	51184	6.183	6.307e-10	82610499	83110499	NO
Cortical thickness	Frontal	Medial Orbitofrontal	6	45511945	rs13201287	A	G	0.2665	77604	-6.474	9.557e-11	45157654	45761945	NO
Cortical thickness	Frontal	Medial Orbitofrontal	7	18741007	rs177080	A	G	0.2835	78532	-7.504	6.171e-14	18484921	19006168	NO
Cortical thickness	Frontal	Medial Orbitofrontal	12	5405847	rs78728690	A	G	0.848	78824	-8.286	1.167e-16	5139325	5711189	NO
Cortical thickness	Frontal	Medial Orbitofrontal	16	87227046	rs12920553	T	G	0.5781	78554	-6.937	3.999e-12	86971075	87508088	NO
Cortical thickness	Frontal	Medial Orbitofrontal	17	43897722	rs79600142	T	C	0.778	76161	-6.481	9.1e-11	43210181	45078931	NO
Cortical thickness	Frontal	Paracentral	2	188284127	rs11896404	T	C	0.3948	73136	-6.882	5.882e-12	187825497	188617875	NO
Cortical thickness	Frontal	Paracentral	3	62572944	rs1993149	T	C	0.7299	79330	7.205	5.783e-13	62209819	62834060	NO
Cortical thickness	Frontal	Paracentral	4	103146890	rs35518360	A	T	0.9199	78102	6.586	4.504e-11	102862470	103448082	NO
Cortical thickness	Frontal	Paracentral	5	122691568	rs80116414	A	T	0.5659	36513	-7.437	1.031e-13	122438588	123005247	NO
Cortical thickness	Frontal	Paracentral	5	131709032	rs112838960	T	TAATA	0.4798	51949	-7.222	5.124e-13	130173559	132061182	NO
Cortical thickness	Frontal	Paracentral	9	139354097	rs35857370	A	G	0.2765	79526	6.916	4.661e-12	139016221	139643175	NO
Cortical thickness	Frontal	Paracentral	13	60337582	rs9538517	A	G	0.3084	79379	-7.014	2.309e-12	59977364	60665258	NO
Cortical thickness	Frontal	Paracentral	16	87221075	rs140058169	A	ATG	0.4078	46406	8.967	3.049e-19	86970845	87515444	NO
Cortical thickness	Frontal	Paracentral	16	88322836	rs143485188	G	GATA	0.6647	50852	-7.186	6.684e-13	88043631	88594517	NO
Cortical thickness	Frontal	Paracentral	17	55319224	rs3916160	T	C	0.5736	79120	-8.266	1.38e-16	55042115	55583211	NO
Cortical thickness	Frontal	Pars Opercularis	5	122727171	rs6877089	T	G	0.705	77353	-6.182	6.314e-10	122409064	123005352	NO
Cortical thickness	Frontal	Pars Opercularis	5	128734008	rs12187568	C	G	0.9263	52948	8.606	7.566e-18	128484008	129172574	NO
Cortical thickness	Frontal	Pars Opercularis	5	128994492	rs17839592	A	T	0.9061	80133	6.937	3.992e-12	128627575	129298046	NO
Cortical thickness	Frontal	Pars Opercularis	14	100352375	rs746698	T	C	0.175	78915	7.891	3.004e-15	100050243	100655757	NO
Cortical thickness	Frontal	Pars Opercularis	15	39636227	rs17694988	T	C	0.9093	79700	10.652	1.71e-26	39345840	39914000	NO
Cortical thickness	Frontal	Pars Orbitalis	6	31555130	rs2256965	A	G	0.4127	79599	-6.247	4.197e-10	31091685	31805130	NO
Cortical thickness	Frontal	Pars Orbitalis	6	39523837	rs1328387	T	C	0.3796	79629	6.609	3.859e-11	39214712	39880464	NO
Cortical thickness	Frontal	Pars Orbitalis	8	122888700	rs1567462	A	C	0.2483	76992	-6.253	4.029e-10	122579941	123138700	YES
Cortical thickness	Frontal	Pars Orbitalis	16	4330667	16:4330667_AAC_A	A	AAC	0.2438	79003	-6.657	2.789e-11	4042002	4603432	NO
Cortical thickness	Frontal	Pars Triangularis	1	47974123	rs61784835	T	C	0.3608	78930	-7.175	7.223e-13	47724123	48230916	NO
Cortical thickness	Frontal	Pars Triangularis	4	103198082	rs13135092	A	G	0.9218	79500	-6.534	6.385e-11	102862470	103637160	NO
Cortical thickness	Frontal	Pars Triangularis	5	128734008	rs12187568	C	G	0.9263	52948	6.744	1.538e-11	128484008	128984008	NO
Cortical thickness	Frontal	Pars Triangularis	7	12752190	rs10233392	T	C	0.6876	78708	7.427	1.111e-13	12462299	13034333	NO
Cortical thickness	Frontal	Pars Triangularis	15	39639898	rs4924345	A	C	0.918	79508	6.643	3.083e-11	39381771	39897894	NO
Cortical thickness	Frontal	Precentral	1	58539350	rs66864104	T	G	0.8238	79188	7.464	8.424e-14	58287919	58811329	NO
Cortical thickness	Frontal	Precentral	2	55670358	rs7589235	T	C	0.2485	79242	-7.774	7.583e-15	55417407	56154762	NO
Cortical thickness	Frontal	Precentral	3	147106319	rs2279829	T	C	0.216	79292	6.919	4.534e-12	146848210	147458513	NO
Cortical thickness	Frontal	Precentral	12	5906139	rs3782652	A	G	0.507	79253	-8.131	4.272e-16	5633770	6186265	NO
Cortical thickness	Frontal	Precentral	12	102285491	rs61935816	T	C	0.1072	79504	-6.201	5.628e-10	101846702	102555523	YES
Cortical thickness	Frontal	Rostral Anterior Cingulate	1	215137727	rs796226228	A	AT	0.3752	49724	-6.25	4.092e-10	214887222	215473052	NO
Cortical thickness	Frontal	Rostral Anterior Cingulate	4	4780454	rs75721280	T	C	0.363	78722	6.99	2.743e-12	4504484	5078179	NO
Cortical thickness	Frontal	Rostral Anterior Cingulate	6	45424940	rs2819861	A	G	0.3596	79288	-6.845	7.651e-12	45157654	45761945	NO
Cortical thickness	Frontal	Rostral Anterior Cingulate	12	53843544	rs111379945	A	C	0.1813	78662	-6.86	6.867e-12	53480160	54267647	YES
Cortical thickness	Frontal	Rostral Anterior Cingulate	13	111032833	rs9583489	T	C	0.2781	79276	-6.743	1.556e-11	110761400	111293309	NO
Cortical thickness	Frontal	Rostral Anterior Cingulate	16	51451683	rs17616633	T	C	0.4398	78682	6.868	6.497e-12	51192679	51740422	NO
Cortical thickness	Frontal	Rostral Anterior Cingulate	17	43914809	rs62054804	T	C	0.2233	75564	8.056	7.854e-16	43210181	45124453	NO
Cortical thickness	Frontal	Rostral Middle Frontal	1	180943529	rs1044595	T	C	0.6007	78691	6.797	1.069e-11	180693529	181261509	NO
Cortical thickness	Frontal	Rostral Middle Frontal	4	103188709	rs13107325	T	C	0.0706	79448	6.741	1.574e-11	102862470	103448082	NO
Cortical thickness	Frontal	Rostral Middle Frontal	5	82861251	5:82861251_TGAGA_T	T	TGAGA	0.1964	73800	6.217	5.079e-10	82607870	83112328	NO
Cortical thickness	Frontal	Superior Frontal	1	46111440	rs72688461	T	G	0.3271	48094	6.727	1.737e-11	45791100	46843014	NO
Cortical thickness	Frontal	Superior Frontal	1	58546624	rs12760204	T	C	0.8238	78823	6.803	1.024e-11	58287919	58912391	NO
Cortical thickness	Frontal	Superior Frontal	1	180954280	1:180954280_GA_G	G	GA	0.6014	56756	7.037	1.968e-12	180690588	181261509	NO
Cortical thickness	Frontal	Superior Frontal	1	215137727	rs796226228	A	AT	0.3752	49724	7.243	4.396e-13	214884722	215435552	NO
Cortical thickness	Frontal	Superior Frontal	1	215218552	rs34843930	CA	C	0.9011	48636	-6.36	2.015e-10	214934413	215468552	NO
Cortical thickness	Frontal	Superior Frontal	2	43765760	rs149360585	CACA	C	0.1508	56295	6.762	1.363e-11	43201957	44100357	NO
Cortical thickness	Frontal	Superior Frontal	2	239621531	rs9677610	A	G	0.4035	77810	-6.862	6.779e-12	239282941	239879102	NO
Cortical thickness	Frontal	Superior Frontal	4	103188709	rs13107325	T	C	0.0706	79468	7.158	8.208e-13	102431040	103448082	NO
Cortical thickness	Frontal	Superior Frontal	5	82844728	rs309596	T	C	0.205	79397	6.267	3.686e-10	82593609	83106519	NO
Cortical thickness	Frontal	Superior Frontal	7	151489711	rs11770585	A	C	0.793	57026	6.695	2.164e-11	151239711	151739711	NO
Cortical thickness	Frontal	Superior Frontal	7	151498679	rs4128399	T	C	0.8367	71384	-10.048	9.348e-24	151242565	151754498	NO
Cortical thickness	Frontal	Superior Frontal	9	113652080	rs7037351	T	C	0.7875	79377	7.56	4.032e-14	113398136	114036658	NO
Cortical thickness	Frontal	Superior Frontal	12	65838953	rs1494510	T	C	0.3722	79322	-7.537	4.798e-14	65505543	66092258	NO
Cortical thickness	Frontal	Superior Frontal	15	85698916	rs8023774	A	G	0.3132	78280	6.681	2.38e-11	85322331	85972892	NO
Cortical thickness	Frontal	Superior Frontal	16	28919583	rs10653411	A	ATT	0.3491	78702	8.42	3.78e-17	28088039	29258079	NO
Cortical thickness	Frontal	Superior Frontal	16	30166183	rs56399904	T	C	0.4753	79087	-7.84	4.52e-15	29684050	30684160	NO
Cortical thickness	Frontal	Superior Frontal	16	70659572	rs140113454	C	G	0.1614	77872	6.448	1.134e-10	69723825	70942762	NO
Cortical thickness	Global	Average	1	39699114	rs11205802	T	C	0.6847	79651	8.272	1.314e-16	39307688	40331463	NO
Cortical thickness	Global	Average	1	57606098	rs537307	A	G	0.8487	79459	6.678	2.428e-11	57339665	57863016	NO
Cortical thickness	Global	Average	1	57636227	rs1857741	T	C	0.8561	79799	6.191	5.997e-10	57384258	57893348	NO
Cortical thickness	Global	Average	1	58546624	rs12760204	T	C	0.8238	79331	-7.244	4.357e-13	58287361	58912391	NO
Cortical thickness	Global	Average	1	204907784	rs2802822	A	G	0.4484	78824	-7.172	7.394e-13	204655308	205219091	YES
Cortical thickness	Global	Average	2	27148654	rs11386753	CT	C	0.3914	79220	8.741	2.302e-18	26711166	27598198	NO
Cortical thickness	Global	Average	2	98275354	rs11692435	A	G	0.0874	74217	-10.404	2.377e-25	97250775	98873406	NO
Cortical thickness	Global	Average	3	13832611	rs4685022	A	G	0.349	77985	6.611	3.823e-11	13483624	14087286	NO
Cortical thickness	Global	Average	3	39510305	rs34457487	A	G	0.5523	69427	8.625	6.432e-18	39222447	39786147	NO
Cortical thickness	Global	Average	3	64185852	rs13099983	A	G	0.3478	79424	6.237	4.471e-10	63934676	64499955	NO
Cortical thickness	Global	Average	3	64431140	rs114898153	A	C	0.44	77882	7.913	2.51e-15	64119380	64696112	NO
Cortical thickness	Global	Average	4	103188709	rs13107325	T	C	0.0706	79975	-10.626	2.252e-26	102452364	103638441	NO
Cortical thickness	Global	Average	4	121643726	rs13110077	T	C	0.2447	79371	7.826	5.042e-15	121296342	122016616	NO
Cortical thickness	Global	Average	5	56036566	rs1121654	A	C	0.2238	79046	6.625	3.472e-11	55758916	56422778	NO
Cortical thickness	Global	Average	5	82767201	rs33609	A	G	0.3048	79509	7.393	1.436e-13	82477859	83039647	NO
Cortical thickness	Global	Average	5	130543648	rs6882231	T	C	0.7997	79619	6.523	6.87e-11	130131448	131562327	NO
Cortical thickness	Global	Average	6	43156160	rs10498754	A	T	0.0873	64608	6.525	6.818e-11	42906160	43406160	NO
Cortical thickness	Global	Average	7	54966738	rs77126132	A	G	0.095	79482	-6.217	5.083e-10	54666280	55265505	NO
Cortical thickness	Global	Average	7	103696539	rs756747	T	G	0.4879	77486	7.602	2.909e-14	103396910	104120219	NO
Cortical thickness	Global	Average	8	8189438	rs2980497	T	C	0.3728	79072	-6.729	1.705e-11	7918474	11337475	NO
Cortical thickness	Global	Average	8	26201601	rs17055142	T	C	0.0781	79648	11.266	1.928e-29	25869170	26737948	NO
Cortical thickness	Global	Average	8	26271120	rs58153210	T	C	0.59	77646	6.334	2.396e-10	25949883	26521120	NO
Cortical thickness	Global	Average	8	27098436	rs1562330	T	C	0.4024	79292	6.615	3.716e-11	26848436	27369538	NO
Cortical thickness	Global	Average	8	110652603	rs79362376	T	C	0.1211	79393	-8.117	4.78e-16	110303594	110971855	NO
Cortical thickness	Global	Average	9	133927878	rs10901333	A	G	0.5315	79246	-6.389	1.67e-10	133665854	134178345	NO
Cortical thickness	Global	Average	13	109707827	rs9521141	T	C	0.8622	78749	-6.67	2.554e-11	109394458	109957827	NO
Cortical thickness	Global	Average	13	111085411	rs9559797	C	G	0.5746	78632	-6.728	1.72e-11	110835411	111355003	NO
Cortical thickness	Global	Average	14	103833669	rs7149827	A	T	0.2922	78816	-6.238	4.422e-10	103583065	104268455	NO
Cortical thickness	Global	Average	16	1817431	rs2575369	T	C	0.5727	78162	6.316	2.686e-10	1560116	2222364	NO
Cortical thickness	Global	Average	16	70141234	rs56299818	T	C	0.3861	67684	-8.108	5.165e-16	69709821	70886995	NO
Cortical thickness	Global	Average	17	2574821	rs12938775	A	G	0.5002	74290	-9.984	1.799e-23	2195904	2879973	NO
Cortical thickness	Global	Average	17	2586229	rs4790356	A	G	0.082	79959	7.099	1.258e-12	2282052	2836229	NO
Cortical thickness	Global	Average	17	2600456	rs2007407	A	C	0.285	74702	-6.497	8.182e-11	2225771	2857560	NO
Cortical thickness	Global	Average	17	10031823	rs28391220	A	C	0.4355	79555	7.074	1.505e-12	9777480	10285337	YES
Cortical thickness	Global	Average	17	19947275	rs62067482	A	G	0.3059	79757	-6.527	6.723e-11	19549698	20634834	NO
Cortical thickness	Global	Average	17	29826666	rs9907422	A	C	0.4109	78675	-6.189	6.037e-10	29576152	30079622	YES
Cortical thickness	Global	Average	17	43920219	17:43920219_AAAG_A	A	AAAG	0.2235	73081	7.005	2.471e-12	43224668	45115498	NO
Cortical thickness	Global	Average	19	7667791	rs4804755	T	C	0.3317	64185	-6.343	2.26e-10	7417791	7917791	YES
Cortical thickness	Global	Average	19	36204690	rs107068	A	G	0.527	79773	-7.256	3.988e-13	35849818	36537869	NO
Cortical thickness	Global	Average	19	46131929	rs8101493	A	C	0.6252	77328	8.485	2.162e-17	45858455	46391845	NO
Cortical thickness	Occipital	Cuneus	2	58578634	rs148899262	CTTTA	C	0.5363	51624	-6.163	7.147e-10	58328234	58857850	NO
Cortical thickness	Occipital	Cuneus	3	64431140	rs114898153	A	C	0.4396	77403	6.884	5.805e-12	64145808	64696112	NO
Cortical thickness	Occipital	Cuneus	3	138694076	rs360709	T	C	0.8383	79216	-6.706	2.003e-11	138441912	139071205	NO
Cortical thickness	Occipital	Cuneus	4	19073685	rs12508031	A	T	0.659	64084	-8.444	3.063e-17	18823685	19345652	YES
Cortical thickness	Occipital	Cuneus	4	103188709	rs13107325	T	C	0.0705	79485	-11.211	3.619e-29	102431041	103638441	NO
Cortical thickness	Occipital	Cuneus	4	145621328	rs75686861	A	G	0.0899	72433	6.597	4.2e-11	145371328	146337979	NO
Cortical thickness	Occipital	Cuneus	5	81883162	rs1847053	T	C	0.3127	79485	-6.163	7.127e-10	81609749	82150820	NO
Cortical thickness	Occipital	Cuneus	5	92872910	5:92872910_GA_G	G	GA	0.0466	72614	6.245	4.229e-10	92433607	93820731	NO
Cortical thickness	Occipital	Cuneus	5	151149662	rs2915878	A	G	0.748	79401	-6.419	1.373e-10	150865517	151520477	NO
Cortical thickness	Occipital	Cuneus	6	170545279	rs3012434	A	G	0.191	70317	-7.064	1.622e-12	170295279	170795507	NO
Cortical thickness	Occipital	Cuneus	7	18905450	rs12700002	T	C	0.5968	79128	-7.293	3.034e-13	18616844	19183411	NO
Cortical thickness	Occipital	Cuneus	9	123488101	rs912536	A	T	0.6934	51120	-6.333	2.4e-10	123108262	123747645	YES
Cortical thickness	Occipital	Cuneus	11	133993112	11:133993112_ATTTG_A	A	ATTTG	0.142	74235	-6.421	1.351e-10	133685551	134353629	NO
Cortical thickness	Occipital	Cuneus	13	26459787	rs9507595	T	C	0.7579	79083	-6.364	1.964e-10	26089526	26726376	YES
Cortical thickness	Occipital	Cuneus	13	81280726	rs9574726	A	G	0.6299	78435	6.183	6.29e-10	80996353	81596508	NO
Cortical thickness	Occipital	Cuneus	14	25429598	rs17185460	T	C	0.7002	79064	6.77	1.291e-11	25179027	25719291	YES
Cortical thickness	Occipital	Cuneus	14	59523841	rs8021598	T	C	0.8469	79353	6.792	1.107e-11	59229823	59832680	NO
Cortical thickness	Occipital	Cuneus	14	59628679	rs76341705	A	G	0.1255	79295	-17.068	2.565e-65	59199138	60283892	NO
Cortical thickness	Occipital	Cuneus	14	59660850	rs557742685	T	TGATGTTGC	0.5365	54145	-6.813	9.563e-12	59371562	59910850	NO
Cortical thickness	Occipital	Cuneus	14	59697746	rs17833810	A	G	0.5709	78694	-9.515	1.81e-21	59348610	60283018	NO
Cortical thickness	Occipital	Cuneus	14	59739352	rs149494783	T	C	0.0347	48870	-6.51	7.538e-11	59489352	59989352	NO
Cortical thickness	Occipital	Cuneus	14	59755578	rs565947904	A	C	0.9511	51132	7.611	2.712e-14	59505578	60005578	NO
Cortical thickness	Occipital	Cuneus	14	59880455	rs61985471	A	T	0.163	78530	-6.797	1.069e-11	59614747	60159106	NO
Cortical thickness	Occipital	Lateral Occipital	1	11825544	rs12564559	T	C	0.888	78344	6.495	8.276e-11	11575544	12078364	YES
Cortical thickness	Occipital	Lateral Occipital	1	11856378	rs1801133	A	G	0.3339	79497	6.955	3.532e-12	11603206	12118284	YES
Cortical thickness	Occipital	Lateral Occipital	1	58544920	rs2764688	A	G	0.1765	78894	6.358	2.042e-10	58287919	58811329	NO
Cortical thickness	Occipital	Lateral Occipital	3	64430551	rs62247449	C	G	0.4408	78209	8.513	1.695e-17	64145132	64696652	NO
Cortical thickness	Occipital	Lateral Occipital	4	103188709	rs13107325	T	C	0.0706	79497	-9.68	3.676e-22	102431041	103638441	NO
Cortical thickness	Occipital	Lateral Occipital	5	60086900	rs12519587	T	C	0.4403	79416	6.889	5.635e-12	59547702	60732104	NO
Cortical thickness	Occipital	Lateral Occipital	5	79920073	rs12517451	T	C	0.2455	79066	10.609	2.697e-26	79646220	80461393	NO
Cortical thickness	Occipital	Lateral Occipital	5	79955999	rs1650689	T	G	0.7642	78495	7.053	1.749e-12	79680858	80354725	NO
Cortical thickness	Occipital	Lateral Occipital	10	118649704	rs5788199	T	TA	0.2496	73377	6.218	5.039e-10	118356810	119027998	NO
Cortical thickness	Occipital	Lateral Occipital	16	87225139	rs4843227	T	C	0.6123	78904	11.556	6.89e-31	86970845	87515444	NO
Cortical thickness	Occipital	Lateral Occipital	17	79615572	rs7405453	A	G	0.3608	77956	7.264	3.761e-13	79217295	79936552	NO
Cortical thickness	Occipital	Lateral Occipital	20	16979509	rs59585835	A	G	0.2642	79066	-9.468	2.84e-21	16653467	17376964	NO
Cortical thickness	Occipital	Lateral Occipital	20	52412489	rs1117557	T	G	0.4552	77280	-6.331	2.429e-10	52161926	52663948	NO
Cortical thickness	Occipital	Lingual	1	46485562	rs946528	T	C	0.6877	79100	6.248	4.152e-10	46011933	46853348	NO
Cortical thickness	Occipital	Lingual	2	49368023	rs13010134	T	G	0.6584	78318	9.723	2.4e-22	48994387	49807612	NO
Cortical thickness	Occipital	Lingual	3	89489529	rs6771054	T	C	0.5926	78876	-8.762	1.926e-18	89023019	90237871	NO
Cortical thickness	Occipital	Lingual	3	172672792	rs6781018	T	G	0.6013	77091	6.495	8.321e-11	172422792	172954468	NO
Cortical thickness	Occipital	Lingual	4	103188709	rs13107325	T	C	0.0706	79489	-7.5	6.359e-14	102751649	103478830	NO
Cortical thickness	Occipital	Lingual	5	82861251	5:82861251_TGAGA_T	T	TGAGA	0.1967	73842	-7.634	2.276e-14	82606519	83112328	NO
Cortical thickness	Occipital	Lingual	7	83761273	rs12707621	A	T	0.2152	79290	6.939	3.951e-12	83482137	84036844	NO
Cortical thickness	Occipital	Lingual	10	31120513	rs7095087	A	G	0.3528	79270	6.412	1.439e-10	30863978	31379883	NO
Cortical thickness	Occipital	Lingual	10	50951894	rs1659308	T	C	0.46	78871	6.786	1.154e-11	50650209	51212257	YES
Cortical thickness	Occipital	Lingual	11	46018139	rs2959101	T	C	0.4452	79109	6.322	2.579e-10	45768139	46268139	YES
Cortical thickness	Occipital	Lingual	13	58577548	rs9537910	A	G	0.5483	79476	-8.08	6.491e-16	58007427	58964835	NO
Cortical thickness	Occipital	Lingual	14	85744057	rs8008671	T	C	0.3103	78192	6.744	1.541e-11	85450803	85995401	NO
Cortical thickness	Occipital	Lingual	15	98441832	rs4965111	T	C	0.6551	77607	-8.22	2.033e-16	98179818	98695797	NO
Cortical thickness	Occipital	Pericalcarine	1	47980916	rs6658111	T	G	0.6329	78233	-7.994	1.303e-15	47694812	48230916	NO
Cortical thickness	Occipital	Pericalcarine	1	243669350	rs1417121	C	G	0.2684	78841	-6.234	4.552e-10	243414642	244259113	NO
Cortical thickness	Occipital	Pericalcarine	2	37124755	rs2691112	T	C	0.4643	78493	-8.634	5.902e-18	36797901	37527241	NO
Cortical thickness	Occipital	Pericalcarine	3	70296251	rs34324736	T	C	0.5257	67883	-7.755	8.804e-15	69777374	70546251	NO
Cortical thickness	Occipital	Pericalcarine	5	82860025	rs10052710	T	G	0.8002	78984	8.099	5.537e-16	82581421	83112328	NO
Cortical thickness	Occipital	Pericalcarine	8	23104195	rs2294123	T	G	0.3964	78911	6.32	2.618e-10	22809593	23362662	NO
Cortical thickness	Occipital	Pericalcarine	13	80497184	rs4885683	A	G	0.1957	78829	6.183	6.295e-10	80174806	80822919	NO
Cortical thickness	Occipital	Pericalcarine	14	59072964	rs160460	A	G	0.5712	78206	-7.382	1.563e-13	58814730	59342075	NO
Cortical thickness	Occipital	Pericalcarine	14	59628609	rs74826997	T	C	0.8745	78959	9.908	3.851e-23	59206583	60141607	NO
Cortical thickness	Occipital	Pericalcarine	19	36171529	rs200261326	A	C	0.504	55391	-8.247	1.624e-16	35829704	36537869	NO
Cortical thickness	Occipital	Pericalcarine	20	25178265	rs6050426	C	G	0.489	56217	-6.571	4.983e-11	24927920	25800372	NO
Cortical thickness	Parietal	Inferior Parietal	1	57819203	rs11590689	T	C	0.4589	78882	-6.874	6.256e-12	57533448	58130694	NO
Cortical thickness	Parietal	Inferior Parietal	1	58546624	rs12760204	T	C	0.8241	78959	-7.526	5.237e-14	58287919	58811329	NO
Cortical thickness	Parietal	Inferior Parietal	1	88228110	rs305417	A	C	0.1326	78761	-6.225	4.804e-10	87907326	88479973	NO
Cortical thickness	Parietal	Inferior Parietal	2	4565310	rs664049	A	T	0.1803	78985	-6.382	1.749e-10	4295705	4821638	YES
Cortical thickness	Parietal	Inferior Parietal	3	104674040	rs6788676	A	G	0.6362	78851	6.227	4.758e-10	104424040	104924040	NO
Cortical thickness	Parietal	Inferior Parietal	5	60500191	rs256374	A	G	0.5328	79547	6.293	3.118e-10	59698395	61004419	NO
Cortical thickness	Parietal	Inferior Parietal	10	105043964	rs1163089	A	G	0.4242	79402	6.744	1.543e-11	104715551	105426914	NO
Cortical thickness	Parietal	Inferior Parietal	14	59036879	rs7152189	A	C	0.6869	78388	6.243	4.297e-10	58770666	59313205	NO
Cortical thickness	Parietal	Inferior Parietal	17	43849415	rs79730878	T	C	0.7729	75344	-7.059	1.676e-12	43213493	45115603	NO
Cortical thickness	Parietal	Isthmus Cingulate	1	39874539	rs113214136	T	G	0.2112	79634	6.963	3.338e-12	39314930	40285928	NO
Cortical thickness	Parietal	Isthmus Cingulate	1	47974123	rs61784835	T	C	0.3615	78775	6.44	1.195e-10	47724123	48230916	NO
Cortical thickness	Parietal	Isthmus Cingulate	1	153966081	rs12564669	C	G	0.2986	74413	6.233	4.584e-10	153508562	154240946	NO
Cortical thickness	Parietal	Isthmus Cingulate	1	155033308	rs11589479	A	G	0.1689	79644	-6.878	6.06e-12	154763708	155349852	NO
Cortical thickness	Parietal	Isthmus Cingulate	2	27067059	rs12713992	A	G	0.5918	79379	-8.129	4.317e-16	26711166	27595484	NO
Cortical thickness	Parietal	Isthmus Cingulate	2	37059557	rs13021775	C	G	0.481	56020	-7.173	7.326e-13	36798617	37635336	NO
Cortical thickness	Parietal	Isthmus Cingulate	2	57973818	rs7557715	T	C	0.6494	79324	7.129	1.011e-12	57692987	58734172	NO
Cortical thickness	Parietal	Isthmus Cingulate	2	104743343	rs6733536	A	G	0.059	79220	-6.542	6.072e-11	104469242	105046056	NO
Cortical thickness	Parietal	Isthmus Cingulate	2	151645865	rs10515926	T	C	0.3682	78439	-7.901	2.767e-15	151367259	151932924	NO
Cortical thickness	Parietal	Isthmus Cingulate	2	225203753	rs138067318	T	C	0.0576	78250	-6.315	2.706e-10	224829400	225491449	NO
Cortical thickness	Parietal	Isthmus Cingulate	2	237585368	rs2720107	T	C	0.7745	77626	-7.345	2.062e-13	237329712	237841007	NO
Cortical thickness	Parietal	Isthmus Cingulate	3	77552911	rs7617960	T	G	0.5816	79520	-6.448	1.135e-10	77262865	77865539	NO
Cortical thickness	Parietal	Isthmus Cingulate	3	88598235	rs7647269	T	C	0.1015	79445	6.275	3.494e-10	88226143	88895200	NO
Cortical thickness	Parietal	Isthmus Cingulate	3	88607236	rs7429378	A	G	0.4452	79207	-6.986	2.827e-12	88248034	88975339	NO
Cortical thickness	Parietal	Isthmus Cingulate	4	103188709	rs13107325	T	C	0.0707	79644	-7.02	2.221e-12	102751649	103637094	NO
Cortical thickness	Parietal	Isthmus Cingulate	5	60319731	rs1479645	A	G	0.4297	79185	-8.755	2.041e-18	59557181	60819133	NO
Cortical thickness	Parietal	Isthmus Cingulate	6	129849509	rs875128	T	G	0.5292	78292	-6.645	3.03e-11	129585370	130106908	NO
Cortical thickness	Parietal	Isthmus Cingulate	7	42015480	rs4724085	A	C	0.6871	79024	7.544	4.559e-14	41753500	42280686	NO
Cortical thickness	Parietal	Isthmus Cingulate	7	43027660	rs10264709	C	G	0.2209	78936	6.537	6.286e-11	42729487	43394227	NO
Cortical thickness	Parietal	Isthmus Cingulate	7	83623044	rs377329758	T	C	0.8294	51275	-6.252	4.041e-10	83327106	84036988	NO
Cortical thickness	Parietal	Isthmus Cingulate	7	83624637	rs1639583	T	C	0.2177	79186	-6.899	5.244e-12	83318943	83889558	NO
Cortical thickness	Parietal	Isthmus Cingulate	9	3924447	rs7861718	A	C	0.6968	77294	-6.268	3.649e-10	3674447	4187288	NO
Cortical thickness	Parietal	Isthmus Cingulate	9	102947502	9:102947502_GATT_G	G	GATT	0.1192	76833	7.511	5.869e-14	102427589	103418023	YES
Cortical thickness	Parietal	Isthmus Cingulate	9	103054190	rs2806699	A	C	0.4194	79624	-7.002	2.527e-12	102762828	103392396	YES
Cortical thickness	Parietal	Isthmus Cingulate	10	34650760	rs143237762	T	TA	0.8987	78641	7.882	3.233e-15	34277997	35091293	NO
Cortical thickness	Parietal	Isthmus Cingulate	10	126424344	10:126424344_GGGCT_G	G	GGGCT	0.4175	77919	8.787	1.53e-18	126052936	126814695	NO
Cortical thickness	Parietal	Isthmus Cingulate	11	20129311	rs35891966	A	G	0.0731	57026	6.547	5.888e-11	19879311	20379311	NO
Cortical thickness	Parietal	Isthmus Cingulate	11	120196433	rs36011588	C	G	0.6241	79421	7.356	1.896e-13	119946433	120611394	YES
Cortical thickness	Parietal	Isthmus Cingulate	12	65830349	rs9783497	A	G	0.3635	79573	6.866	6.625e-12	65505543	66092258	NO
Cortical thickness	Parietal	Isthmus Cingulate	12	96618763	rs2300553	A	C	0.6409	77633	7.645	2.097e-14	96335771	96874780	YES
Cortical thickness	Parietal	Isthmus Cingulate	14	91884655	rs1285847	T	C	0.5562	79102	9.234	2.604e-20	91601096	92335967	NO
Cortical thickness	Parietal	Isthmus Cingulate	17	4396110	rs333116	A	G	0.5076	79105	6.957	3.487e-12	4136669	4646110	YES
Cortical thickness	Parietal	Isthmus Cingulate	19	13122612	rs8103241	A	G	0.5438	79092	-6.575	4.867e-11	12839890	13372612	NO
Cortical thickness	Parietal	Postcentral	1	57785117	rs924848	A	G	0.3532	77802	-6.579	4.735e-11	57535055	58056895	NO
Cortical thickness	Parietal	Postcentral	1	98552832	rs1198588	A	T	0.2042	79409	8.378	5.377e-17	98048371	98901527	NO
Cortical thickness	Parietal	Postcentral	2	175012137	rs4972433	A	G	0.3989	79197	-6.419	1.373e-10	174680016	175343533	YES
Cortical thickness	Parietal	Postcentral	2	190001241	rs5837128	A	AAT	0.0363	52175	-8.085	6.205e-16	189632901	190610239	NO
Cortical thickness	Parietal	Postcentral	2	226538708	rs775771245	CCT	C	0.9234	77183	8.946	3.679e-19	226161583	226920185	NO
Cortical thickness	Parietal	Postcentral	2	229941644	rs56192920	A	G	0.6414	77775	-6.399	1.559e-10	229676672	230209362	NO
Cortical thickness	Parietal	Postcentral	4	67778949	rs11937688	A	C	0.2597	79101	6.396	1.598e-10	67469177	68035486	YES
Cortical thickness	Parietal	Postcentral	5	128734008	rs12187568	C	G	0.9263	52948	-8.034	9.419e-16	128484008	129172574	NO
Cortical thickness	Parietal	Postcentral	7	99141373	rs10278040	A	G	0.0614	79364	-6.507	7.656e-11	98770806	99516318	NO
Cortical thickness	Parietal	Postcentral	7	99534660	rs549207733	A	ATT	0.6266	50722	-6.461	1.041e-10	99284660	99847523	NO
Cortical thickness	Parietal	Postcentral	7	99733315	rs11768171	T	C	0.5176	79247	9.286	1.603e-20	99274420	100440116	NO
Cortical thickness	Parietal	Postcentral	7	99765628	rs2405441	C	G	0.1061	34806	6.374	1.838e-10	99515628	100015628	NO
Cortical thickness	Parietal	Postcentral	7	100098358	rs558839824	CA	C	0.5268	33392	-6.803	1.028e-11	99209256	100348358	NO
Cortical thickness	Parietal	Postcentral	9	119829372	rs545280277	T	C	0.1193	51173	-6.944	3.811e-12	119573229	120094776	YES
Cortical thickness	Parietal	Postcentral	9	120088933	rs10983621	A	G	0.4987	78515	-6.413	1.426e-10	119836041	120362007	YES
Cortical thickness	Parietal	Postcentral	10	423226	rs10904065	T	G	0.3543	79116	6.299	3.003e-10	-44147	739363	YES
Cortical thickness	Parietal	Postcentral	12	5911464	rs735393	T	C	0.3153	79034	-7.337	2.179e-13	5649597	6186265	NO
Cortical thickness	Parietal	Postcentral	13	74325912	rs7320096	T	C	0.4277	78736	6.98	2.952e-12	74060094	74587745	YES
Cortical thickness	Parietal	Postcentral	13	80188089	rs2093620	A	C	0.4727	79258	6.465	1.011e-10	79889762	80442906	NO
Cortical thickness	Parietal	Postcentral	13	80917527	rs497857	T	C	0.617	77968	7.267	3.684e-13	80633646	81169712	NO
Cortical thickness	Parietal	Postcentral	13	103110651	rs7328178	C	G	0.3847	77894	6.585	4.547e-11	102818415	103384252	YES
Cortical thickness	Parietal	Postcentral	13	110598964	rs928543	A	G	0.336	77914	-6.193	5.908e-10	110331878	110871437	NO
Cortical thickness	Parietal	Postcentral	15	25892633	rs7172211	A	G	0.8212	79370	7.446	9.629e-14	25635026	26153354	YES
Cortical thickness	Parietal	Postcentral	15	39057113	rs2958316	A	G	0.0608	79070	-7.426	1.121e-13	38807113	39360817	NO
Cortical thickness	Parietal	Postcentral	15	39097273	rs2958272	T	G	0.513	79109	-7.025	2.135e-12	38801984	39362034	NO
Cortical thickness	Parietal	Postcentral	15	39362815	rs55849520	A	G	0.0398	78285	6.857	7.016e-12	39107211	39674693	NO
Cortical thickness	Parietal	Postcentral	15	39509914	rs112961173	T	C	0.9923	56795	-9.913	3.64e-23	39091889	40152993	NO
Cortical thickness	Parietal	Postcentral	15	39519925	rs156795	A	G	0.4754	72349	8.109	5.086e-16	39123598	39769925	NO
Cortical thickness	Parietal	Postcentral	15	39521489	rs8036004	A	G	0.1966	78886	8.233	1.831e-16	39220820	39843159	NO
Cortical thickness	Parietal	Postcentral	15	39553621	rs11387498	A	AG	0.2076	78261	14.727	4.332e-49	39282647	39879952	NO
Cortical thickness	Parietal	Postcentral	15	39569843	rs71896388	T	TA	0.3904	28470	7.132	9.901e-13	39319843	39819843	NO
Cortical thickness	Parietal	Postcentral	15	39593893	rs374154454	G	GAGT	0.9912	56833	-11.205	3.853e-29	39291864	40141636	NO
Cortical thickness	Parietal	Postcentral	15	39598407	rs141038481	T	C	0.9924	69466	-8.617	6.879e-18	39003829	39848407	NO
Cortical thickness	Parietal	Postcentral	15	39622765	rs144753089	G	GA	0.9914	56579	-7.106	1.192e-12	39372765	39872765	NO
Cortical thickness	Parietal	Postcentral	15	39625991	rs11070186	C	G	0.4606	30349	-6.172	6.746e-10	39375991	39875991	NO
Cortical thickness	Parietal	Postcentral	15	39629777	rs62002319	T	C	0.9792	71753	-8.721	2.753e-18	39379777	39879777	NO
Cortical thickness	Parietal	Postcentral	15	39631771	rs11639391	T	C	0.0896	79325	41.999	1.74e-385	39284404	39919067	NO
Cortical thickness	Parietal	Postcentral	15	39640301	rs148182077	T	C	0.007	62515	13.338	1.387e-40	39300929	39996094	NO
Cortical thickness	Parietal	Postcentral	15	39643601	rs35327539	A	C	0.4615	77461	-14.621	2.07e-48	39355388	39920175	NO
Cortical thickness	Parietal	Postcentral	15	39662900	rs62002339	T	C	0.0062	52146	9.112	8.077e-20	39196757	40152657	NO
Cortical thickness	Parietal	Postcentral	15	39665537	rs145370012	A	G	0.0058	56848	8.558	1.147e-17	39415537	39915537	NO
Cortical thickness	Parietal	Postcentral	15	39671514	rs11070197	T	C	0.759	73382	-9.69	3.33e-22	39421514	39921514	NO
Cortical thickness	Parietal	Postcentral	15	39712918	rs6492885	T	C	0.2462	77092	-9.104	8.735e-20	39432222	40105617	NO
Cortical thickness	Parietal	Postcentral	15	39742570	rs62005276	T	C	0.1343	79606	12.246	1.773e-34	39422231	40196562	NO
Cortical thickness	Parietal	Postcentral	15	39858743	rs200876921	A	AAAAT	0.9878	51089	-7.038	1.956e-12	39452365	40108743	NO
Cortical thickness	Parietal	Postcentral	15	99286980	rs61168554	A	G	0.6507	78746	9.513	1.847e-21	98998018	99570851	NO
Cortical thickness	Parietal	Postcentral	16	28851377	rs148099387	CCT	C	0.397	56929	-6.663	2.687e-11	28088039	29172743	NO
Cortical thickness	Parietal	Postcentral	16	61651391	rs1319995	C	G	0.4023	78275	6.184	6.239e-10	61343731	61901406	YES
Cortical thickness	Parietal	Postcentral	17	44024749	17:44024749_CT_C	CT	C	0.6951	42009	7.462	8.533e-14	43210181	45115603	NO
Cortical thickness	Parietal	Postcentral	18	22323379	18:22323379_AAT_A	A	AAT	0.2199	78610	10.445	1.541e-25	21911126	22667476	NO
Cortical thickness	Parietal	Postcentral	20	46367372	rs56374036	A	G	0.7876	77960	6.776	1.232e-11	46107261	46625446	NO
Cortical thickness	Parietal	Postcentral	22	47196383	rs801592	T	G	0.2767	79400	12.273	1.272e-34	46884727	47547844	NO
Cortical thickness	Parietal	Postcentral	22	49408735	rs5769796	A	G	0.2446	77968	9.364	7.66e-21	49152542	49673934	NO
Cortical thickness	Parietal	Posterior Cingulate	2	37095397	rs34989109	G	GA	0.4545	56618	-6.418	1.383e-10	36809462	37434485	NO
Cortical thickness	Parietal	Posterior Cingulate	2	105473698	rs732278	T	G	0.4336	78579	-6.351	2.135e-10	105223698	105734195	NO
Cortical thickness	Parietal	Posterior Cingulate	2	162264215	rs2018759	A	G	0.3836	77518	6.558	5.46e-11	161937800	162569725	NO
Cortical thickness	Parietal	Posterior Cingulate	2	200960036	rs17446229	A	G	0.1733	73224	-6.483	8.997e-11	200470378	201273127	NO
Cortical thickness	Parietal	Posterior Cingulate	3	88643136	rs11915360	T	C	0.565	79328	6.883	5.845e-12	88248034	89319546	NO
Cortical thickness	Parietal	Posterior Cingulate	5	66106140	rs56328685	T	C	0.3487	79658	-8.943	3.778e-19	65675955	66464496	NO
Cortical thickness	Parietal	Posterior Cingulate	5	173279112	rs359454	A	T	0.8434	79585	6.539	6.213e-11	173023447	173618820	YES
Cortical thickness	Parietal	Posterior Cingulate	6	108996748	rs3800228	T	G	0.2885	79289	7.792	6.578e-15	108611264	109270332	NO
Cortical thickness	Parietal	Posterior Cingulate	7	29329058	rs757425	A	G	0.2082	79189	6.936	4.023e-12	29069999	29642109	NO
Cortical thickness	Parietal	Posterior Cingulate	8	41182326	rs7008630	A	G	0.5704	79355	6.159	7.34e-10	40914925	41453570	NO
Cortical thickness	Parietal	Posterior Cingulate	10	14692532	rs7092176	A	G	0.5418	79260	-6.781	1.193e-11	14401050	14947137	NO
Cortical thickness	Parietal	Posterior Cingulate	10	73724548	rs4148908	A	G	0.7062	78597	6.204	5.502e-10	73474548	73974548	YES
Cortical thickness	Parietal	Posterior Cingulate	12	117473252	rs7962875	C	G	0.7025	78510	6.757	1.41e-11	117051754	117748860	YES
Cortical thickness	Parietal	Posterior Cingulate	15	39635124	rs1440802	T	C	0.9077	79310	10.067	7.751e-24	39345340	39919067	NO
Cortical thickness	Parietal	Posterior Cingulate	15	63483977	rs2729793	T	C	0.3222	79030	-6.289	3.201e-10	63183766	63733977	YES
Cortical thickness	Parietal	Posterior Cingulate	15	73431600	rs2415142	T	G	0.449	79252	8.827	1.075e-18	72977249	73877770	NO
Cortical thickness	Parietal	Posterior Cingulate	16	87231160	rs4843555	T	C	0.4194	79037	8.206	2.287e-16	86970845	87508088	NO
Cortical thickness	Parietal	Posterior Cingulate	20	10649319	20:10649319_GT_G	G	GT	0.2131	54102	-6.484	8.956e-11	10397679	10902709	NO
Cortical thickness	Parietal	Precuneus	1	47980916	rs6658111	T	G	0.634	79024	6.631	3.33e-11	47724123	48234143	NO
Cortical thickness	Parietal	Precuneus	1	155507543	rs5020058	A	T	0.2673	78257	7.022	2.185e-12	154922379	156201502	NO
Cortical thickness	Parietal	Precuneus	1	205774897	rs823075	T	C	0.4121	79471	7.248	4.227e-13	205396278	206062614	NO
Cortical thickness	Parietal	Precuneus	1	215139887	rs1452628	A	T	0.6247	79511	-10.89	1.284e-27	214884041	215473052	NO
Cortical thickness	Parietal	Precuneus	1	215240671	rs11120482	A	T	0.4521	56830	7.541	4.681e-14	214968173	216014396	NO
Cortical thickness	Parietal	Precuneus	3	45795731	3:45795731_CTCTT_C	CTCTT	C	0.8987	79120	-6.952	3.595e-12	45291785	46068144	NO
Cortical thickness	Parietal	Precuneus	7	2827786	rs571208715	CA	C	0.3189	49415	7.194	6.282e-13	2502152	3159225	NO
Cortical thickness	Parietal	Precuneus	11	110946372	rs11418777	T	TC	0.6889	78869	-6.574	4.912e-11	110695939	111212880	NO
Cortical thickness	Parietal	Precuneus	16	51446384	rs11641011	T	C	0.4542	79779	-7.326	2.376e-13	51188099	51711433	NO
Cortical thickness	Parietal	Precuneus	17	17732319	rs9894257	T	C	0.6431	79143	-6.285	3.286e-10	17446531	18005431	YES
Cortical thickness	Parietal	Precuneus	22	38148882	rs11089854	A	G	0.2991	74713	7.168	7.585e-13	37853545	38458260	NO
Cortical thickness	Parietal	Superior Parietal	1	215139887	rs1452628	A	T	0.6248	79083	-14.752	2.979e-49	214884041	215539079	NO
Cortical thickness	Parietal	Superior Parietal	1	215185552	rs2601645	T	C	0.0854	79246	11.313	1.135e-29	214877220	216011794	NO
Cortical thickness	Parietal	Superior Parietal	1	215218173	rs2802645	T	C	0.4406	42472	-7.932	2.149e-15	214934209	216081431	NO
Cortical thickness	Parietal	Superior Parietal	3	45775904	rs571706177	CA	C	0.0964	51281	6.76	1.379e-11	45499183	46068144	NO
Cortical thickness	Parietal	Superior Parietal	3	124480430	rs2055983	A	G	0.8119	79143	-6.363	1.984e-10	124189567	124795750	NO
Cortical thickness	Parietal	Superior Parietal	4	185126789	rs1882325	T	G	0.3409	79080	-6.207	5.401e-10	184875306	185377318	YES
Cortical thickness	Parietal	Superior Parietal	6	151023605	rs552091835	CA	C	0.4057	50739	9.261	2.02e-20	150753892	151293485	NO
Cortical thickness	Parietal	Superior Parietal	6	151116876	rs112407782	CAT	C	0.7187	51381	-6.374	1.847e-10	150856169	151366876	NO
Cortical thickness	Parietal	Superior Parietal	7	2890816	7:2890816_AAAAAAG_A	A	AAAAAAG	0.2994	51132	7.986	1.393e-15	2502152	3163079	NO
Cortical thickness	Parietal	Superior Parietal	9	113643396	rs12555590	T	C	0.7897	79197	7.585	3.337e-14	113334517	113894460	NO
Cortical thickness	Parietal	Superior Parietal	9	113677069	rs72748146	A	G	0.7874	78890	9.565	1.122e-21	113398136	114036658	NO
Cortical thickness	Parietal	Superior Parietal	11	110951665	rs68122012	T	C	0.3074	79167	7.551	4.32e-14	110695055	111290690	NO
Cortical thickness	Parietal	Superior Parietal	11	130275749	rs11222085	T	C	0.8116	79093	-7.48	7.406e-14	130010673	130538797	NO
Cortical thickness	Parietal	Superior Parietal	13	99723081	rs11620127	A	G	0.8928	79424	6.805	1.008e-11	99385611	100012453	NO
Cortical thickness	Parietal	Superior Parietal	13	111038379	rs75345389	T	C	0.7305	49350	-6.25	4.113e-10	110782833	111291530	NO
Cortical thickness	Parietal	Superior Parietal	16	2153765	rs144979397	A	G	0.0108	56374	-6.304	2.908e-10	1874775	2451175	NO
Cortical thickness	Parietal	Superior Parietal	16	51446384	rs11641011	T	C	0.4543	79351	-9.204	3.46e-20	51155993	51740422	NO
Cortical thickness	Parietal	Superior Parietal	16	87229344	rs56023709	A	C	0.3841	78991	-14.219	6.979e-46	86955497	87602184	NO
Cortical thickness	Parietal	Superior Parietal	22	38134166	rs4820303	A	G	0.294	79302	6.664	2.668e-11	37853545	38458260	NO
Cortical thickness	Parietal	Supramarginal	1	183696656	rs6424909	A	G	0.6226	78798	6.378	1.794e-10	183304281	184009410	YES
Cortical thickness	Parietal	Supramarginal	2	162901327	rs16822665	T	C	0.3148	78576	-6.295	3.073e-10	162563807	163158664	NO
Cortical thickness	Parietal	Supramarginal	2	239035214	rs376820890	G	GTGTC	0.4914	38459	-6.465	1.01e-10	238775645	239285937	NO
Cortical thickness	Parietal	Supramarginal	3	62574621	rs861303	T	C	0.7128	78080	-7.371	1.688e-13	62209819	62834060	NO
Cortical thickness	Parietal	Supramarginal	15	39559439	rs11854792	A	G	0.6255	78524	6.436	1.228e-10	39306435	39810228	NO
Cortical thickness	Temporal	Banks of the Superior Temporal Sulcus	6	31337170	rs2853988	A	T	0.5239	56942	-6.341	2.28e-10	31086870	31613510	NO
Cortical thickness	Temporal	Banks of the Superior Temporal Sulcus	9	136146597	rs550057	T	C	0.2614	78935	6.514	7.33e-11	135882908	136405000	NO
Cortical thickness	Temporal	Banks of the Superior Temporal Sulcus	14	58989516	rs28711143	T	G	0.2711	78503	-7.512	5.841e-14	58606652	59312622	NO
Cortical thickness	Temporal	Banks of the Superior Temporal Sulcus	14	59013971	rs10132077	A	C	0.7782	78961	-6.379	1.784e-10	58763971	59374132	NO
Cortical thickness	Temporal	Banks of the Superior Temporal Sulcus	14	59072226	rs186347	T	G	0.4627	77966	12.558	3.601e-36	58783475	59383479	NO
Cortical thickness	Temporal	Entorhinal	2	200430602	rs6726842	A	G	0.4117	75936	6.549	5.776e-11	199436506	200756820	NO
Cortical thickness	Temporal	Entorhinal	5	81855572	rs4703894	A	G	0.5736	77960	-7.501	6.355e-14	81469570	82143325	NO
Cortical thickness	Temporal	Entorhinal	5	82922895	5:82922895_AT_A	A	AT	0.135	56500	-6.173	6.704e-10	82616076	83189810	NO
Cortical thickness	Temporal	Entorhinal	16	69128053	rs9926320	A	G	0.3149	78010	-8.69	3.636e-18	68805675	69678761	NO
Cortical thickness	Temporal	Fusiform	1	47980916	rs6658111	T	G	0.6337	78780	-7.895	2.905e-15	47720998	48243332	NO
Cortical thickness	Temporal	Fusiform	3	45802715	rs532687890	A	AC	0.8914	50355	6.183	6.302e-10	45525904	46052715	NO
Cortical thickness	Temporal	Inferior Temporal	1	58546624	rs12760204	T	C	0.8236	78818	-6.298	3.006e-10	58287919	58811329	NO
Cortical thickness	Temporal	Inferior Temporal	2	237496112	rs12692189	T	C	0.1932	78081	6.989	2.761e-12	237228328	237760596	NO
Cortical thickness	Temporal	Inferior Temporal	2	237708853	rs4663665	A	T	0.325	78047	-10.019	1.256e-23	237448452	237982282	NO
Cortical thickness	Temporal	Inferior Temporal	3	89497082	rs7633500	A	G	0.3473	78802	-8.475	2.352e-17	89029467	90260903	NO
Cortical thickness	Temporal	Inferior Temporal	8	10220412	rs11249992	A	C	0.3899	77985	-6.442	1.177e-10	7869248	11839042	NO
Cortical thickness	Temporal	Inferior Temporal	17	27152869	rs9303620	T	C	0.7222	79308	-6.313	2.732e-10	26821442	27573322	YES
Cortical thickness	Temporal	Inferior Temporal	17	43856372	rs111735741	A	G	0.2222	71279	9.885	4.845e-23	43210181	45115603	NO
Cortical thickness	Temporal	Insula	1	215144758	rs7531398	A	G	0.9288	78700	7.089	1.354e-12	214884722	215481643	NO
Cortical thickness	Temporal	Insula	2	204015972	rs140201293	T	C	0.8745	77660	-6.943	3.828e-12	203389395	204446618	NO
Cortical thickness	Temporal	Insula	4	38691024	rs2242189	T	C	0.6193	77510	-7.396	1.401e-13	38306399	38995482	NO
Cortical thickness	Temporal	Insula	6	30699022	rs3095327	A	G	0.1588	56991	7.415	1.22e-13	29824072	32929326	NO
Cortical thickness	Temporal	Insula	6	45424498	rs2820340	A	G	0.6383	78784	6.397	1.586e-10	45157654	45761945	NO
Cortical thickness	Temporal	Insula	7	151498679	rs4128399	T	C	0.8373	71202	7.18	6.954e-13	151246826	151754459	NO
Cortical thickness	Temporal	Insula	8	120596023	rs10283100	A	G	0.0556	72145	-6.738	1.601e-11	120346023	120846023	NO
Cortical thickness	Temporal	Insula	9	113612082	rs767545600	A	AC	0.2557	73956	7.712	1.24e-14	113334517	113928725	NO
Cortical thickness	Temporal	Insula	9	113654033	rs148957934	G	GA	0.7884	73790	-7.653	1.965e-14	113398136	114034557	NO
Cortical thickness	Temporal	Insula	9	113830547	rs2418130	T	C	0.3374	78501	6.55	5.772e-11	113578811	114080547	NO
Cortical thickness	Temporal	Insula	16	51451683	rs17616633	T	C	0.4399	78095	8.369	5.789e-17	51157936	51723920	NO
Cortical thickness	Temporal	Insula	17	66078536	rs62084744	T	C	0.7887	69142	-6.698	2.11e-11	65572573	66348154	NO
Cortical thickness	Temporal	Insula	22	38182546	rs8135578	T	C	0.3005	78121	-7.935	2.109e-15	37852776	38594054	NO
Cortical thickness	Temporal	Middle Temporal	1	58539350	rs66864104	T	G	0.8238	78628	-7.036	1.974e-12	58287361	58811329	NO
Cortical thickness	Temporal	Middle Temporal	2	237478328	rs201243303	G	GT	0.8593	66714	-6.961	3.376e-12	237228328	237757314	NO
Cortical thickness	Temporal	Middle Temporal	2	237708487	rs1344762	T	C	0.6745	77689	9.458	3.148e-21	237448452	237972195	NO
Cortical thickness	Temporal	Middle Temporal	3	89469453	rs7632502	A	T	0.4092	78534	-6.787	1.145e-11	89192305	90001353	NO
Cortical thickness	Temporal	Middle Temporal	9	77668533	rs773144	T	C	0.4149	78863	7.366	1.753e-13	77414595	77934439	YES
Cortical thickness	Temporal	Middle Temporal	14	59061439	rs17094750	A	G	0.2751	78914	-8.45	2.923e-17	58606652	59312622	NO
Cortical thickness	Temporal	Middle Temporal	14	59072226	rs186347	T	G	0.4621	78052	12.891	5.066e-38	58602891	59372445	NO
Cortical thickness	Temporal	Middle Temporal	14	59104329	rs160469	A	G	0.0692	79012	6.579	4.733e-11	58722955	59363537	NO
Cortical thickness	Temporal	Middle Temporal	17	43858307	rs62057066	T	C	0.7805	75440	-9.075	1.134e-19	43213493	45115603	NO
Cortical thickness	Temporal	Parahippocampal	1	47974123	rs61784835	T	C	0.3612	78017	6.802	1.032e-11	47695825	48251930	NO
Cortical thickness	Temporal	Parahippocampal	1	53712727	rs5174	T	C	0.4134	78886	7.01	2.385e-12	53406676	54004891	NO
Cortical thickness	Temporal	Parahippocampal	2	237714392	2:237714392_CT_C	CT	C	0.3046	52832	-6.18	6.398e-10	237448452	237964770	NO
Cortical thickness	Temporal	Parahippocampal	3	190647187	rs13066753	T	C	0.3824	76450	7.998	1.26e-15	190342836	190928743	NO
Cortical thickness	Temporal	Parahippocampal	4	1017235	rs76451154	A	G	0.2247	75069	6.818	9.236e-12	751742	1267235	YES
Cortical thickness	Temporal	Parahippocampal	4	4780454	rs75721280	T	C	0.3627	77746	6.432	1.262e-10	4506636	5031109	NO
Cortical thickness	Temporal	Parahippocampal	4	66463209	4:66463209_GA_G	G	GA	0.3359	73700	6.942	3.859e-12	66200520	66776528	YES
Cortical thickness	Temporal	Parahippocampal	4	187375639	rs62348868	T	C	0.1657	78687	-6.607	3.922e-11	187116735	187640722	NO
Cortical thickness	Temporal	Parahippocampal	5	148663809	rs352359	C	G	0.3501	75161	-7.888	3.075e-15	148413119	148928775	NO
Cortical thickness	Temporal	Parahippocampal	5	179728860	rs4700932	A	C	0.5519	78862	-6.965	3.293e-12	179476223	180034709	YES
Cortical thickness	Temporal	Parahippocampal	6	138848339	rs11154981	A	G	0.3147	77442	-6.331	2.436e-10	138590190	139123329	NO
Cortical thickness	Temporal	Parahippocampal	6	149920249	rs9322194	T	C	0.3298	77822	6.798	1.061e-11	149624899	150494689	YES
Cortical thickness	Temporal	Parahippocampal	7	83740015	rs1990045	T	C	0.428	78522	-8.644	5.437e-18	83321278	84049292	NO
Cortical thickness	Temporal	Parahippocampal	7	139252780	rs1638195	T	C	0.3542	62393	-6.303	2.91e-10	139002780	139502780	YES
Cortical thickness	Temporal	Parahippocampal	9	18032972	rs10963403	T	C	0.388	78886	6.325	2.531e-10	17756202	18337491	YES
Cortical thickness	Temporal	Parahippocampal	9	98177173	rs357561	T	C	0.0964	78471	-8.415	3.938e-17	97887552	98448202	NO
Cortical thickness	Temporal	Parahippocampal	9	98259703	rs10512248	T	G	0.6654	78886	11.259	2.082e-29	97893402	98582625	NO
Cortical thickness	Temporal	Parahippocampal	9	98800048	rs690575	T	C	0.5999	77658	-6.407	1.485e-10	98305518	99053415	NO
Cortical thickness	Temporal	Parahippocampal	10	34284837	rs224690	T	C	0.2642	78784	-9.476	2.649e-21	34010946	34547184	NO
Cortical thickness	Temporal	Parahippocampal	10	94708571	rs34150616	A	AT	0.3198	78195	-6.615	3.715e-11	94327629	95081523	YES
Cortical thickness	Temporal	Parahippocampal	11	110954023	rs550039625	T	TA	0.7309	44792	6.174	6.667e-10	110695939	111212880	NO
Cortical thickness	Temporal	Parahippocampal	12	65718299	rs17178006	T	G	0.8871	78155	7.132	9.89e-13	65468299	66124956	NO
Cortical thickness	Temporal	Parahippocampal	14	59617080	rs4901902	A	C	0.8756	78572	8.06	7.617e-16	59255196	60112824	NO
Cortical thickness	Temporal	Parahippocampal	14	61031989	14:61031989_CAA_C	CAA	C	0.3842	24995	-6.336	2.361e-10	60781989	61281989	NO
Cortical thickness	Temporal	Parahippocampal	14	100273625	rs10144013	T	C	0.5106	72061	6.577	4.814e-11	99973304	100523625	NO
Cortical thickness	Temporal	Parahippocampal	17	28300144	rs4077465	T	C	0.5193	78794	-8.757	2.007e-18	27679412	28803639	NO
[truncated: 31 more rows]

## Sheet: Table S4
Supplementary Table 4. Significant variant-trait associations (P < 5 × 10-8 ) for cortical thickness and surface area identified by C-GWASs.
Phenotype	CHR	BP	Lead SNP	P	Locus	Multivariate-specific loci	New loci
Cortical surface area	10	306566	10:306566:G:A	6.97e-11	[-82148,859580]	NO	NO
Cortical surface area	10	3441161	10:3441161:A:T	2.74e-09	[3136075,3757050]	YES	YES
Cortical surface area	10	4641938	10:4641938:C:A	6.41e-15	[4387631,5061925]	NO	NO
Cortical surface area	10	4811925	10:4811925:T:C	1.07e-08	[4387631,5061925]	NO	NO
Cortical surface area	10	5588567	10:5588567:C:G	6.53e-09	[5338567,5838567]	NO	NO
Cortical surface area	10	7451241	10:7451241:G:A	4.9e-10	[7198966,7960215]	NO	NO
Cortical surface area	10	7704917	10:7704917:A:G	1.33e-08	[7198966,7960215]	NO	NO
Cortical surface area	10	9193659	10:9193659:TG:T	4.31e-12	[8942126,9465488]	YES	NO
Cortical surface area	10	12206193	10:12206193:T:G	1.27e-11	[11915461,12468626]	NO	NO
Cortical surface area	10	13052019	10:13052019:A:G	1.07e-09	[12802019,13306307]	YES	NO
Cortical surface area	10	13675820	10:13675820:C:T	6.31e-14	[13383835,13945069]	NO	NO
Cortical surface area	10	20105223	10:20105223:A:G	6.56e-10	[19827441,20378809]	YES	NO
Cortical surface area	10	21822856	10:21822856:G:A	8.11e-57	[21379890,22548641]	NO	NO
Cortical surface area	10	21667602	10:21667602:G:A	5.22e-09	[21379890,22548641]	NO	NO
Cortical surface area	10	27994179	10:27994179:TA:T	4.99e-10	[27727627,28282136]	YES	YES
Cortical surface area	10	31090820	10:31090820:A:G	2.94e-09	[30840820,31527988]	NO	NO
Cortical surface area	10	31117358	10:31117358:A:G	1.04e-14	[30840820,31527988]	NO	NO
Cortical surface area	10	32236492	10:32236492:T:C	1.98e-08	[31731999,32703388]	NO	NO
Cortical surface area	10	32268326	10:32268326:C:G	3.67e-22	[31731999,32703388]	NO	NO
Cortical surface area	10	32289983	10:32289983:A:G	3.34e-11	[31731999,32703388]	NO	NO
Cortical surface area	10	32357760	10:32357760:A:G	2.71e-08	[31731999,32703388]	NO	NO
Cortical surface area	10	33458887	10:33458887:GTA:G	6.26e-09	[33208887,33939279]	NO	NO
Cortical surface area	10	33489052	10:33489052:A:G	2.3e-21	[33208887,33939279]	NO	NO
Cortical surface area	10	33593822	10:33593822:G:A	3.22e-17	[33208887,33939279]	NO	NO
Cortical surface area	10	33623443	10:33623443:A:G	7.51e-09	[33208887,33939279]	NO	NO
Cortical surface area	10	33645644	10:33645644:G:A	9.38e-09	[33208887,33939279]	NO	NO
Cortical surface area	10	33685898	10:33685898:A:G	1.31e-11	[33208887,33939279]	NO	NO
Cortical surface area	10	34518603	10:34518603:T:TG	1.12e-09	[34240737,35205387]	NO	NO
Cortical surface area	10	34697775	10:34697775:T:TATA	8.98e-12	[34240737,35205387]	NO	NO
Cortical surface area	10	34697689	10:34697689:G:A	8.23e-14	[34240737,35205387]	NO	NO
Cortical surface area	10	34948362	10:34948362:C:T	6.65e-09	[34240737,35205387]	NO	NO
Cortical surface area	10	36858248	10:36858248:C:T	2.57e-09	[36597991,37339118]	NO	NO
Cortical surface area	10	37056102	10:37056102:C:A	1.12e-14	[36597991,37339118]	NO	NO
Cortical surface area	10	37071931	10:37071931:T:TTTTC	4.58e-09	[36597991,37339118]	NO	NO
Cortical surface area	10	43678796	10:43678796:T:C	1.05e-11	[43365908,45387400]	NO	NO
Cortical surface area	10	44308627	10:44308627:A:AG	2.36e-13	[43365908,45387400]	NO	NO
Cortical surface area	10	44406205	10:44406205:G:A	2.52e-08	[43365908,45387400]	NO	NO
Cortical surface area	10	44589843	10:44589843:T:C	2.52e-09	[43365908,45387400]	NO	NO
Cortical surface area	10	45090556	10:45090556:T:C	5.47e-09	[43365908,45387400]	YES	YES
Cortical surface area	10	48442078	10:48442078:T:C	1.19e-12	[48184995,48700392]	YES	NO
Cortical surface area	10	49642210	10:49642210:T:A	4.07e-10	[49269255,49905363]	YES	YES
Cortical surface area	10	50307286	10:50307286:T:C	3.91e-30	[49960710,50675252]	NO	NO
Cortical surface area	10	54212597	10:54212597:C:T	3.97e-10	[53962597,54473977]	NO	NO
Cortical surface area	10	62052544	10:62052544:G:C	9.77e-26	[61765637,62724774]	NO	NO
Cortical surface area	10	62345640	10:62345640:A:G	1.29e-13	[61765637,62724774]	NO	NO
Cortical surface area	10	63579214	10:63579214:G:T	2.47e-10	[63274979,63854734]	YES	NO
Cortical surface area	10	65234512	10:65234512:G:A	2.14e-12	[64631382,65610089]	YES	NO
Cortical surface area	10	70636267	10:70636267:T:TA	5.74e-10	[70369276,70904719]	YES	NO
Cortical surface area	10	72440653	10:72440653:T:C	6.2e-10	[72163239,72710799]	NO	NO
Cortical surface area	10	82214792	10:82214792:T:C	1.07e-10	[81951651,82470514]	NO	NO
Cortical surface area	10	89765544	10:89765544:A:G	5.12e-10	[89389056,90546467]	NO	NO
Cortical surface area	10	90245519	10:90245519:T:A	9.6e-12	[89389056,90546467]	NO	NO
Cortical surface area	10	90293866	10:90293866:T:C	5.91e-09	[89389056,90546467]	NO	NO
Cortical surface area	10	94670560	10:94670560:T:C	1.21e-16	[94320602,95073343]	NO	NO
Cortical surface area	10	96023077	10:96023077:C:T	5.39e-13	[95762950,96398536]	YES	NO
Cortical surface area	10	96148536	10:96148536:C:T	4.21e-08	[95762950,96398536]	YES	NO
Cortical surface area	10	99079023	10:99079023:A:G	9.48e-15	[98724707,99455686]	YES	YES
Cortical surface area	10	102106367	10:102106367:C:T	1.62e-08	[101856367,102626017]	NO	NO
Cortical surface area	10	102245664	10:102245664:C:T	1.57e-21	[101856367,102626017]	NO	NO
Cortical surface area	10	102206751	10:102206751:T:TA	1.41e-11	[101856367,102626017]	NO	NO
Cortical surface area	10	104359884	10:104359884:T:C	1.27e-26	[103964080,105943644]	NO	NO
Cortical surface area	10	105265610	10:105265610:G:C	1.91e-16	[103964080,105943644]	NO	NO
Cortical surface area	10	105012994	10:105012994:C:T	1.81e-25	[103964080,105943644]	NO	NO
Cortical surface area	10	104636655	10:104636655:C:G	9.12e-12	[103964080,105943644]	NO	NO
Cortical surface area	10	105455294	10:105455294:A:G	1.41e-08	[103964080,105943644]	NO	NO
Cortical surface area	10	105601210	10:105601210:T:C	3.65e-10	[103964080,105943644]	NO	NO
Cortical surface area	10	111767214	10:111767214:T:C	3.14e-08	[111514786,112210458]	YES	NO
Cortical surface area	10	111792819	10:111792819:A:C	5.59e-09	[111514786,112210458]	YES	NO
Cortical surface area	10	114711983	10:114711983:G:A	4.24e-18	[114428843,115124019]	NO	NO
Cortical surface area	10	114788190	10:114788190:TG:T	5e-15	[114428843,115124019]	NO	NO
Cortical surface area	10	114782581	10:114782581:GCT:G	2.31e-09	[114428843,115124019]	NO	NO
Cortical surface area	10	114874019	10:114874019:T:C	7.46e-09	[114428843,115124019]	NO	NO
Cortical surface area	10	118678712	10:118678712:A:C	1.99e-54	[118325606,119572934]	NO	NO
Cortical surface area	10	118901704	10:118901704:C:T	9.14e-12	[118325606,119572934]	NO	NO
Cortical surface area	10	119293438	10:119293438:T:C	1.64e-21	[118325606,119572934]	NO	NO
Cortical surface area	10	120018245	10:120018245:T:C	1.61e-11	[119768245,120268245]	NO	NO
Cortical surface area	10	123194558	10:123194558:G:A	2.43e-15	[122925486,123535620]	NO	NO
Cortical surface area	10	123285620	10:123285620:T:G	1.44e-17	[122925486,123535620]	NO	NO
Cortical surface area	10	126427037	10:126427037:T:G	1.79e-41	[126020643,128229263]	NO	NO
Cortical surface area	10	126844621	10:126844621:T:C	8.32e-23	[126020643,128229263]	NO	NO
Cortical surface area	10	127182553	10:127182553:A:G	1.72e-30	[126020643,128229263]	NO	NO
Cortical surface area	10	127692391	10:127692391:T:C	4.51e-13	[126020643,128229263]	NO	NO
Cortical surface area	10	127924008	10:127924008:T:C	2.13e-11	[126020643,128229263]	NO	NO
Cortical surface area	11	1462217	11:1462217:T:C	6.99e-13	[1204487,1876719]	YES	NO
Cortical surface area	11	1626718	11:1626718:C:T	3.25e-08	[1204487,1876719]	YES	NO
Cortical surface area	11	2176852	11:2176852:G:C	3.23e-10	[1926042,2428616]	YES	NO
Cortical surface area	11	9909127	11:9909127:A:G	7.14e-11	[9594402,10203750]	YES	YES
Cortical surface area	11	10659889	11:10659889:C:T	9.09e-09	[10404911,10919228]	NO	NO
Cortical surface area	11	11922325	11:11922325:C:T	1.4e-10	[11583739,13144758]	NO	NO
Cortical surface area	11	12072213	11:12072213:G:C	4.61e-40	[11583739,13144758]	NO	NO
Cortical surface area	11	12228640	11:12228640:C:T	3.3e-11	[11583739,13144758]	NO	NO
Cortical surface area	11	12886870	11:12886870:C:G	1.11e-10	[11583739,13144758]	YES	YES
Cortical surface area	11	14390463	11:14390463:T:G	1.36e-13	[14006444,14706179]	NO	NO
Cortical surface area	11	16389284	11:16389284:A:G	1.43e-08	[16139284,16724547]	YES	YES
Cortical surface area	11	17025712	11:17025712:A:G	2.01e-15	[16750864,17601683]	NO	NO
Cortical surface area	11	17101155	11:17101155:T:C	9.82e-10	[16750864,17601683]	NO	NO
Cortical surface area	11	19101663	11:19101663:C:T	1.05e-09	[18846299,20379311]	NO	NO
Cortical surface area	11	19495799	11:19495799:A:G	1.71e-13	[18846299,20379311]	NO	NO
Cortical surface area	11	19878032	11:19878032:C:T	7.07e-09	[18846299,20379311]	NO	NO
Cortical surface area	11	19942722	11:19942722:C:A	5.38e-16	[18846299,20379311]	NO	NO
Cortical surface area	11	19930923	11:19930923:T:A	4.81e-11	[18846299,20379311]	NO	NO
Cortical surface area	11	20029148	11:20029148:T:C	8.06e-12	[18846299,20379311]	NO	NO
Cortical surface area	11	20047944	11:20047944:A:C	4.5e-08	[18846299,20379311]	NO	NO
Cortical surface area	11	20070225	11:20070225:G:C	1.35e-18	[18846299,20379311]	NO	NO
Cortical surface area	11	20065673	11:20065673:T:G	2.69e-13	[18846299,20379311]	NO	NO
Cortical surface area	11	20104669	11:20104669:A:G	1.71e-08	[18846299,20379311]	NO	NO
Cortical surface area	11	20129311	11:20129311:A:G	4.7e-24	[18846299,20379311]	NO	NO
Cortical surface area	11	27335331	11:27335331:T:A	2.87e-10	[27013832,27691127]	YES	NO
Cortical surface area	11	28866669	11:28866669:A:T	6.95e-14	[28550075,29355522]	NO	NO
Cortical surface area	11	30602281	11:30602281:G:C	2.92e-30	[30332806,32084516]	NO	NO
Cortical surface area	11	30607515	11:30607515:C:A	5.53e-10	[30332806,32084516]	NO	NO
Cortical surface area	11	30758215	11:30758215:A:G	2.14e-10	[30332806,32084516]	NO	NO
Cortical surface area	11	31523130	11:31523130:G:A	8.8e-28	[30332806,32084516]	NO	NO
Cortical surface area	11	31065370	11:31065370:CT:C	5.44e-11	[30332806,32084516]	NO	NO
Cortical surface area	11	32956492	11:32956492:T:C	9.51e-13	[32345598,33206492]	NO	NO
Cortical surface area	11	36998602	11:36998602:G:A	1.3e-14	[36741247,37284268]	NO	NO
Cortical surface area	11	44330610	11:44330610:T:C	5.53e-22	[44045329,45066904]	NO	NO
Cortical surface area	11	44374400	11:44374400:C:T	1.28e-12	[44045329,45066904]	NO	NO
Cortical surface area	11	44408066	11:44408066:C:G	5.52e-09	[44045329,45066904]	NO	NO
Cortical surface area	11	44791079	11:44791079:G:A	4.97e-11	[44045329,45066904]	NO	NO
Cortical surface area	11	46141422	11:46141422:A:G	4.26e-12	[45768139,48196836]	NO	NO
Cortical surface area	11	46390680	11:46390680:A:C	5.45e-13	[45768139,48196836]	NO	NO
Cortical surface area	11	47611152	11:47611152:T:C	4.1e-15	[45768139,48196836]	NO	NO
Cortical surface area	11	46911704	11:46911704:T:C	6.13e-10	[45768139,48196836]	NO	NO
Cortical surface area	11	47427667	11:47427667:C:T	1.23e-10	[45768139,48196836]	NO	NO
Cortical surface area	11	47380593	11:47380593:A:G	3.48e-08	[45768139,48196836]	NO	NO
Cortical surface area	11	57624127	11:57624127:A:G	1.22e-10	[57183449,57919443]	NO	NO
Cortical surface area	11	58296806	11:58296806:A:G	5.4e-11	[57924653,58663910]	YES	NO
Cortical surface area	11	61551356	11:61551356:C:T	8.28e-16	[61293499,61874181]	YES	NO
Cortical surface area	11	63464500	11:63464500:G:A	3.84e-10	[63131458,63954115]	YES	YES
Cortical surface area	11	63644048	11:63644048:T:C	6.22e-10	[63131458,63954115]	YES	NO
Cortical surface area	11	65368434	11:65368434:G:A	2.39e-13	[65010646,65894363]	NO	NO
Cortical surface area	11	65405600	11:65405600:T:G	1.2e-14	[65010646,65894363]	NO	NO
Cortical surface area	11	66292363	11:66292363:T:TAA	2.74e-09	[65957837,66751624]	NO	NO
Cortical surface area	11	67916097	11:67916097:T:C	4.56e-09	[67657662,68424189]	NO	NO
Cortical surface area	11	68174189	11:68174189:A:G	2.05e-08	[67657662,68424189]	NO	NO
Cortical surface area	11	68926522	11:68926522:T:C	7.92e-14	[68653465,69758159]	NO	NO
Cortical surface area	11	69476279	11:69476279:T:C	3.08e-09	[68653465,69758159]	YES	NO
Cortical surface area	11	76156973	11:76156973:A:G	1.76e-10	[75875116,76517477]	YES	YES
Cortical surface area	11	85929490	11:85929490:A:G	1.11e-09	[85673217,86244731]	NO	NO
Cortical surface area	11	90578176	11:90578176:G:A	1.49e-09	[90328176,91179579]	YES	NO
Cortical surface area	11	90929004	11:90929004:A:C	3.4e-08	[90328176,91179579]	YES	NO
Cortical surface area	11	91517103	11:91517103:T:C	1.5e-14	[91244546,92877643]	NO	NO
Cortical surface area	11	91958224	11:91958224:A:G	1.71e-15	[91244546,92877643]	NO	NO
Cortical surface area	11	92154583	11:92154583:G:A	1.55e-08	[91244546,92877643]	NO	NO
Cortical surface area	11	92245676	11:92245676:T:A	1.17e-13	[91244546,92877643]	NO	NO
Cortical surface area	11	92451567	11:92451567:A:G	4.29e-66	[91244546,92877643]	NO	NO
Cortical surface area	11	92568908	11:92568908:G:A	6.38e-18	[91244546,92877643]	NO	NO
Cortical surface area	11	95274265	11:95274265:A:AAT	4.01e-11	[95024265,95931028]	NO	NO
Cortical surface area	11	95473365	11:95473365:C:T	8.62e-17	[95024265,95931028]	NO	NO
Cortical surface area	11	102345274	11:102345274:C:A	3.79e-11	[102095274,102615622]	NO	NO
Cortical surface area	11	104010052	11:104010052:T:C	2.07e-21	[103735306,104291862]	NO	NO
Cortical surface area	11	110602398	11:110602398:T:C	1.66e-09	[110090699,112229741]	NO	NO
Cortical surface area	11	110359223	11:110359223:A:G	1.47e-08	[110090699,112229741]	NO	NO
Cortical surface area	11	110822577	11:110822577:A:G	6.26e-10	[110090699,112229741]	NO	NO
Cortical surface area	11	110890291	11:110890291:C:T	5.96e-22	[110090699,112229741]	NO	NO
Cortical surface area	11	110925058	11:110925058:T:C	6.06e-11	[110090699,112229741]	NO	NO
Cortical surface area	11	110905063	11:110905063:C:T	7.56e-11	[110090699,112229741]	NO	NO
Cortical surface area	11	110953355	11:110953355:G:A	1.53e-46	[110090699,112229741]	NO	NO
Cortical surface area	11	111056158	11:111056158:A:G	9.19e-37	[110090699,112229741]	NO	NO
Cortical surface area	11	111074555	11:111074555:G:A	1.32e-15	[110090699,112229741]	NO	NO
Cortical surface area	11	111052312	11:111052312:C:CATAT	2.12e-08	[110090699,112229741]	NO	NO
Cortical surface area	11	111056940	11:111056940:A:T	6.95e-12	[110090699,112229741]	NO	NO
Cortical surface area	11	111105014	11:111105014:G:A	3.27e-11	[110090699,112229741]	NO	NO
Cortical surface area	11	111854137	11:111854137:G:GGGA	2.17e-16	[110090699,112229741]	NO	NO
Cortical surface area	11	112912947	11:112912947:T:C	1.22e-10	[112662430,113304493]	NO	NO
Cortical surface area	11	114073200	11:114073200:T:C	2.36e-22	[113778774,114371640]	NO	NO
Cortical surface area	11	114082956	11:114082956:A:C	1.77e-21	[113778774,114371640]	NO	NO
Cortical surface area	11	114103542	11:114103542:G:A	1.23e-14	[113778774,114371640]	NO	NO
Cortical surface area	11	114121640	11:114121640:G:A	6.05e-11	[113778774,114371640]	NO	NO
Cortical surface area	11	118478330	11:118478330:A:G	1.41e-12	[118228330,118843218]	YES	NO
Cortical surface area	11	120348584	11:120348584:A:G	1.19e-11	[119946433,120611394]	NO	NO
Cortical surface area	11	120212601	11:120212601:C:T	4.01e-14	[119946433,120611394]	NO	NO
Cortical surface area	11	121370023	11:121370023:G:A	3.78e-10	[121109265,121652643]	NO	NO
Cortical surface area	11	125016380	11:125016380:C:T	1.02e-15	[124765284,125294540]	YES	NO
Cortical surface area	11	125819058	11:125819058:T:C	2.26e-09	[125568297,126082659]	NO	NO
Cortical surface area	11	130446448	11:130446448:A:T	1.69e-13	[130177963,130952454]	NO	NO
Cortical surface area	11	130444800	11:130444800:G:A	4.77e-18	[130177963,130952454]	NO	NO
Cortical surface area	11	130701504	11:130701504:T:C	3.07e-10	[130177963,130952454]	NO	NO
Cortical surface area	11	133953225	11:133953225:C:CA	3.19e-15	[133685551,134353629]	NO	NO
Cortical surface area	12	1509621	12:1509621:A:G	3.75e-13	[999250,1952929]	NO	NO
Cortical surface area	12	1702929	12:1702929:G:T	1.11e-08	[999250,1952929]	NO	NO
Cortical surface area	12	4006431	12:4006431:G:A	2.25e-09	[3756431,4662762]	NO	NO
Cortical surface area	12	4400111	12:4400111:T:C	4.1e-13	[3756431,4662762]	NO	NO
Cortical surface area	12	4403876	12:4403876:T:C	2.02e-13	[3756431,4662762]	NO	NO
Cortical surface area	12	5314508	12:5314508:A:G	4.47e-41	[4997991,6186265]	NO	NO
Cortical surface area	12	5315345	12:5315345:T:C	9.07e-13	[4997991,6186265]	NO	NO
Cortical surface area	12	5317199	12:5317199:G:A	3.04e-10	[4997991,6186265]	NO	NO
Cortical surface area	12	5336997	12:5336997:T:C	2.77e-08	[4997991,6186265]	NO	NO
Cortical surface area	12	5538112	12:5538112:A:G	2.12e-19	[4997991,6186265]	NO	NO
Cortical surface area	12	5536065	12:5536065:G:A	2.33e-08	[4997991,6186265]	NO	NO
Cortical surface area	12	5800576	12:5800576:A:G	7.04e-09	[4997991,6186265]	NO	NO
Cortical surface area	12	5824045	12:5824045:A:T	1.46e-11	[4997991,6186265]	NO	NO
Cortical surface area	12	5906292	12:5906292:C:A	7.07e-27	[4997991,6186265]	NO	NO
Cortical surface area	12	5917738	12:5917738:T:C	2.51e-13	[4997991,6186265]	NO	NO
Cortical surface area	12	6545417	12:6545417:A:C	8.8e-24	[6294617,7123818]	NO	NO
Cortical surface area	12	6873818	12:6873818:A:G	2.7e-08	[6294617,7123818]	NO	NO
Cortical surface area	12	12853288	12:12853288:T:TTTG	8.92e-09	[12603288,13121099]	NO	NO
Cortical surface area	12	12871099	12:12871099:G:T	1.02e-14	[12603288,13121099]	NO	NO
Cortical surface area	12	17406796	12:17406796:G:A	6.74e-09	[17146655,17656796]	YES	YES
Cortical surface area	12	23979352	12:23979352:A:T	1e-14	[23675568,24535197]	NO	NO
Cortical surface area	12	24071751	12:24071751:C:T	6.86e-11	[23675568,24535197]	NO	NO
Cortical surface area	12	24166426	12:24166426:C:T	2.72e-16	[23675568,24535197]	NO	NO
Cortical surface area	12	24234001	12:24234001:G:A	8.04e-38	[23675568,24535197]	NO	NO
Cortical surface area	12	27788021	12:27788021:A:G	1.27e-19	[27516123,28990649]	NO	NO
Cortical surface area	12	28284841	12:28284841:T:A	2.93e-16	[27516123,28990649]	NO	NO
Cortical surface area	12	28360621	12:28360621:A:C	1.05e-09	[27516123,28990649]	NO	NO
Cortical surface area	12	32542762	12:32542762:T:C	1.39e-08	[32292762,32792762]	YES	NO
Cortical surface area	12	41531873	12:41531873:G:A	2.85e-09	[41111591,42052209]	NO	NO
Cortical surface area	12	41730619	12:41730619:G:A	9.69e-14	[41111591,42052209]	NO	NO
Cortical surface area	12	43646602	12:43646602:A:C	7.79e-12	[43336429,43934266]	NO	NO
Cortical surface area	12	46837624	12:46837624:G:T	4.68e-12	[46412485,47255736]	YES	NO
Cortical surface area	12	48392914	12:48392914:G:C	5.65e-17	[48122888,49008281]	NO	NO
Cortical surface area	12	49389320	12:49389320:C:A	1.24e-15	[49019999,49862779]	NO	NO
Cortical surface area	12	51106178	12:51106178:A:G	3.26e-10	[50400057,51395194]	YES	YES
Cortical surface area	12	52251272	12:52251272:T:G	3.47e-09	[52001272,52508777]	YES	NO
Cortical surface area	12	53506808	12:53506808:C:T	1.77e-10	[53248725,54351087]	NO	NO
Cortical surface area	12	53894465	12:53894465:A:G	2.16e-20	[53248725,54351087]	NO	NO
Cortical surface area	12	53812345	12:53812345:C:T	3.8e-12	[53248725,54351087]	NO	NO
Cortical surface area	12	54670055	12:54670055:C:T	6.31e-09	[54373132,54924235]	YES	NO
Cortical surface area	12	56473808	12:56473808:C:T	4.04e-38	[56114321,56870797]	NO	NO
Cortical surface area	12	56542363	12:56542363:CA:C	1.79e-08	[56114321,56870797]	NO	NO
Cortical surface area	12	57918085	12:57918085:A:C	5.04e-22	[57582072,58341039]	NO	NO
Cortical surface area	12	62969668	12:62969668:C:T	6e-20	[62498111,63305563]	NO	NO
Cortical surface area	12	65372996	12:65372996:T:C	1.12e-08	[65122996,66639968]	NO	NO
Cortical surface area	12	65400292	12:65400292:G:T	2.49e-08	[65122996,66639968]	NO	NO
Cortical surface area	12	65515382	12:65515382:A:G	4.69e-14	[65122996,66639968]	NO	NO
Cortical surface area	12	65795603	12:65795603:C:T	2.09e-74	[65122996,66639968]	NO	NO
Cortical surface area	12	65581968	12:65581968:A:ACT	1.45e-09	[65122996,66639968]	NO	NO
Cortical surface area	12	65707858	12:65707858:C:A	4.27e-12	[65122996,66639968]	NO	NO
Cortical surface area	12	65905126	12:65905126:T:C	1.88e-39	[65122996,66639968]	NO	NO
Cortical surface area	12	65802945	12:65802945:T:C	3.62e-15	[65122996,66639968]	NO	NO
Cortical surface area	12	66250940	12:66250940:G:T	2.21e-13	[65122996,66639968]	NO	NO
Cortical surface area	12	66374247	12:66374247:G:A	4.61e-39	[65122996,66639968]	NO	NO
Cortical surface area	12	66995054	12:66995054:C:T	1.61e-17	[66744489,67285142]	NO	NO
Cortical surface area	12	68081637	12:68081637:GA:G	1.81e-09	[67831637,68994717]	NO	NO
Cortical surface area	12	68216239	12:68216239:A:T	5.5e-22	[67831637,68994717]	NO	NO
Cortical surface area	12	68726857	12:68726857:C:T	1.42e-17	[67831637,68994717]	NO	NO
Cortical surface area	12	69682327	12:69682327:A:G	1.34e-08	[69386314,69972880]	YES	NO
Cortical surface area	12	77974221	12:77974221:C:T	6.7e-10	[77626151,78725772]	NO	NO
Cortical surface area	12	78241285	12:78241285:G:A	5.32e-32	[77626151,78725772]	NO	NO
Cortical surface area	12	78368377	12:78368377:C:T	4.37e-13	[77626151,78725772]	NO	NO
Cortical surface area	12	78475772	12:78475772:G:C	3.87e-08	[77626151,78725772]	NO	NO
Cortical surface area	12	79974565	12:79974565:T:C	1.07e-55	[79508550,80364680]	NO	NO
Cortical surface area	12	80038849	12:80038849:C:A	9.73e-13	[79508550,80364680]	NO	NO
Cortical surface area	12	83969100	12:83969100:G:A	3.38e-08	[83719100,84242306]	NO	NO
Cortical surface area	12	85576492	12:85576492:A:G	2.37e-30	[85151925,86007448]	NO	NO
Cortical surface area	12	85568294	12:85568294:G:A	6.35e-15	[85151925,86007448]	NO	NO
Cortical surface area	12	89758139	12:89758139:A:C	1.15e-10	[89490072,90028237]	NO	NO
Cortical surface area	12	94535947	12:94535947:G:A	4.8e-10	[94285947,94785947]	YES	YES
Cortical surface area	12	95412808	12:95412808:T:C	5.66e-11	[95143999,96874780]	NO	NO
Cortical surface area	12	95629171	12:95629171:T:G	3.58e-09	[95143999,96874780]	NO	NO
Cortical surface area	12	96128771	12:96128771:T:C	1.52e-12	[95143999,96874780]	NO	NO
Cortical surface area	12	96618763	12:96618763:C:A	6.71e-20	[95143999,96874780]	NO	NO
Cortical surface area	12	101359340	12:101359340:G:A	1.05e-09	[101039022,101609340]	YES	NO
Cortical surface area	12	102922986	12:102922986:C:G	3.8e-22	[102144872,103738841]	NO	NO
Cortical surface area	12	102701921	12:102701921:G:A	3.2e-09	[102144872,103738841]	NO	NO
Cortical surface area	12	103359061	12:103359061:A:G	2.2e-11	[102144872,103738841]	NO	NO
Cortical surface area	12	103441809	12:103441809:TA:T	5.42e-15	[102144872,103738841]	NO	NO
Cortical surface area	12	105910112	12:105910112:A:T	2.59e-13	[105652537,107620210]	NO	NO
Cortical surface area	12	106140217	12:106140217:C:CT	2.7e-08	[105652537,107620210]	NO	NO
Cortical surface area	12	106476805	12:106476805:C:T	2.7e-74	[105652537,107620210]	NO	NO
Cortical surface area	12	106764239	12:106764239:T:G	2.62e-11	[105652537,107620210]	NO	NO
Cortical surface area	12	107132808	12:107132808:A:AT	1.12e-30	[105652537,107620210]	NO	NO
Cortical surface area	12	108569304	12:108569304:T:C	2.44e-11	[108277561,109518216]	NO	NO
Cortical surface area	12	109057809	12:109057809:C:A	7.06e-28	[108277561,109518216]	NO	NO
Cortical surface area	12	110819139	12:110819139:T:G	9.82e-09	[110569139,111069139]	NO	NO
Cortical surface area	12	111884608	12:111884608:C:T	2.5e-21	[111176615,113274793]	NO	NO
Cortical surface area	12	112805165	12:112805165:T:G	2.38e-16	[111176615,113274793]	NO	NO
Cortical surface area	12	116771071	12:116771071:A:C	3.14e-15	[116507486,117756632]	YES	NO
Cortical surface area	12	117064543	12:117064543:T:C	8.35e-09	[116507486,117756632]	NO	NO
Cortical surface area	12	117323367	12:117323367:C:T	1.22e-23	[116507486,117756632]	NO	NO
Cortical surface area	12	117368660	12:117368660:C:T	1.58e-09	[116507486,117756632]	NO	NO
Cortical surface area	12	120783527	12:120783527:A:G	3.76e-11	[120495968,121074574]	NO	NO
Cortical surface area	12	121835979	12:121835979:G:A	1.04e-09	[121575187,122706987]	NO	NO
Cortical surface area	12	122211782	12:122211782:G:A	4.6e-10	[121575187,122706987]	NO	NO
Cortical surface area	12	122402723	12:122402723:C:T	3.34e-09	[121575187,122706987]	NO	NO
Cortical surface area	12	123760109	12:123760109:A:T	5.09e-16	[123197928,124163433]	NO	NO
Cortical surface area	12	130573565	12:130573565:A:G	4.14e-18	[130307709,130830716]	NO	NO
Cortical surface area	12	133688707	12:133688707:C:T	1.05e-08	[133438707,133938707]	YES	NO
Cortical surface area	13	22186091	13:22186091:C:T	7.29e-15	[21935708,23256264]	NO	NO
Cortical surface area	13	22617937	13:22617937:G:C	1.06e-09	[21935708,23256264]	NO	NO
Cortical surface area	13	22641112	13:22641112:A:G	4.89e-12	[21935708,23256264]	NO	NO
Cortical surface area	13	22983760	13:22983760:T:G	1.83e-20	[21935708,23256264]	NO	NO
Cortical surface area	13	25718538	13:25718538:T:C	2.69e-09	[25466391,25968538]	YES	YES
Cortical surface area	13	26459787	13:26459787:C:T	2.75e-23	[26066494,26938841]	NO	NO
Cortical surface area	13	26683327	13:26683327:G:A	3.96e-12	[26066494,26938841]	NO	NO
Cortical surface area	13	29998312	13:29998312:G:A	4.53e-08	[29748312,30249514]	YES	YES
Cortical surface area	13	36535494	13:36535494:C:G	5.03e-17	[36245803,36828153]	NO	NO
Cortical surface area	13	46400734	13:46400734:T:G	1.56e-08	[46130938,46654955]	NO	NO
Cortical surface area	13	47237213	13:47237213:C:T	3.25e-29	[46812093,47573718]	NO	NO
Cortical surface area	13	60421219	13:60421219:T:A	2.1e-08	[59990571,60671219]	NO	NO
Cortical surface area	13	72760444	13:72760444:A:G	7.91e-14	[72435613,73415860]	NO	NO
Cortical surface area	13	73165860	13:73165860:G:A	6.98e-12	[72435613,73415860]	NO	NO
Cortical surface area	13	80188089	13:80188089:A:C	2.71e-37	[79605297,81912019]	NO	NO
Cortical surface area	13	80440491	13:80440491:T:G	1.2e-12	[79605297,81912019]	NO	NO
Cortical surface area	13	80607516	13:80607516:G:A	1.81e-16	[79605297,81912019]	NO	NO
Cortical surface area	13	80955963	13:80955963:T:C	5.8e-12	[79605297,81912019]	NO	NO
Cortical surface area	13	81535120	13:81535120:G:T	1.34e-17	[79605297,81912019]	NO	NO
Cortical surface area	13	81298526	13:81298526:C:T	1.14e-50	[79605297,81912019]	NO	NO
Cortical surface area	13	81255688	13:81255688:T:C	1.56e-26	[79605297,81912019]	NO	NO
Cortical surface area	13	81626740	13:81626740:A:AT	2.58e-09	[79605297,81912019]	NO	NO
Cortical surface area	13	91458234	13:91458234:C:T	2.79e-10	[91207259,91738000]	YES	YES
Cortical surface area	13	99665512	13:99665512:A:C	1.46e-10	[99385611,101509952]	NO	NO
Cortical surface area	13	100258738	13:100258738:GA:G	1.85e-11	[99385611,101509952]	NO	NO
Cortical surface area	13	100381250	13:100381250:G:A	4.13e-11	[99385611,101509952]	NO	NO
Cortical surface area	13	100555291	13:100555291:T:C	1.56e-17	[99385611,101509952]	NO	NO
Cortical surface area	13	100617305	13:100617305:A:G	1.91e-14	[99385611,101509952]	NO	NO
Cortical surface area	13	100936906	13:100936906:G:T	4.52e-27	[99385611,101509952]	NO	NO
Cortical surface area	13	101084168	13:101084168:T:G	1.63e-08	[99385611,101509952]	NO	NO
Cortical surface area	13	101185769	13:101185769:G:A	1.03e-11	[99385611,101509952]	NO	NO
Cortical surface area	13	105991760	13:105991760:G:C	1.34e-10	[105741760,106256203]	NO	NO
Cortical surface area	13	107058406	13:107058406:C:T	4.99e-15	[106785002,108014876]	NO	NO
Cortical surface area	13	107179352	13:107179352:T:A	1.63e-08	[106785002,108014876]	NO	NO
Cortical surface area	13	107443584	13:107443584:C:T	7.84e-09	[106785002,108014876]	NO	NO
Cortical surface area	13	107639540	13:107639540:C:T	2.67e-22	[106785002,108014876]	NO	NO
Cortical surface area	13	109690303	13:109690303:G:A	6.94e-14	[109421323,109960082]	NO	NO
Cortical surface area	13	109707827	13:109707827:C:T	3.87e-08	[109421323,109960082]	NO	NO
Cortical surface area	13	110426871	13:110426871:C:T	1.24e-08	[110176871,110681626]	NO	NO
Cortical surface area	14	23398990	14:23398990:G:T	1.43e-12	[23122913,24091393]	NO	NO
Cortical surface area	14	23491284	14:23491284:G:C	2.25e-08	[23122913,24091393]	NO	NO
Cortical surface area	14	23830042	14:23830042:C:T	2.98e-11	[23122913,24091393]	NO	NO
Cortical surface area	14	25429598	14:25429598:C:T	2.8e-14	[25179027,25767972]	NO	NO
Cortical surface area	14	26854296	14:26854296:T:G	2.45e-11	[26603193,27136758]	YES	NO
Cortical surface area	14	29235537	14:29235537:G:C	7.28e-35	[28953527,30104122]	NO	NO
Cortical surface area	14	29527744	14:29527744:A:C	5.84e-13	[28953527,30104122]	NO	NO
Cortical surface area	14	29702590	14:29702590:G:T	1.48e-18	[28953527,30104122]	NO	NO
Cortical surface area	14	29807405	14:29807405:G:GA	6.78e-16	[28953527,30104122]	NO	NO
Cortical surface area	14	30615057	14:30615057:A:G	2.66e-13	[30325922,30917365]	NO	NO
Cortical surface area	14	30605068	14:30605068:A:G	5.37e-09	[30325922,30917365]	NO	NO
Cortical surface area	14	31385733	14:31385733:A:G	1.62e-25	[31109024,31883029]	NO	NO
Cortical surface area	14	31583512	14:31583512:T:C	1.79e-11	[31109024,31883029]	NO	NO
Cortical surface area	14	32637088	14:32637088:C:G	2.7e-08	[32387088,32887088]	YES	NO
Cortical surface area	14	50735947	14:50735947:C:T	3.41e-09	[50485947,51250770]	YES	NO
Cortical surface area	14	50982983	14:50982983:T:C	3.55e-08	[50485947,51250770]	YES	NO
Cortical surface area	14	53405423	14:53405423:T:C	1.14e-08	[53155423,53655423]	YES	NO
Cortical surface area	14	53959954	14:53959954:T:A	2.29e-09	[53678462,55044576]	NO	NO
Cortical surface area	14	54317110	14:54317110:A:G	7e-14	[53678462,55044576]	NO	NO
Cortical surface area	14	54420647	14:54420647:ACC:A	7.72e-14	[53678462,55044576]	NO	NO
Cortical surface area	14	54777745	14:54777745:A:G	2.1e-28	[53678462,55044576]	NO	NO
Cortical surface area	14	54612245	14:54612245:C:A	3.54e-09	[53678462,55044576]	NO	NO
Cortical surface area	14	55850315	14:55850315:A:C	2.11e-11	[55320849,56121452]	NO	NO
Cortical surface area	14	57336842	14:57336842:A:C	8.65e-15	[56982723,57710628]	NO	NO
Cortical surface area	14	57271127	14:57271127:T:G	1.97e-24	[56982723,57710628]	NO	NO
Cortical surface area	14	57373205	14:57373205:G:A	3.37e-10	[56982723,57710628]	NO	NO
Cortical surface area	14	58564485	14:58564485:A:G	5.12e-19	[58285531,61862611]	NO	NO
Cortical surface area	14	58788674	14:58788674:GT:G	3.29e-25	[58285531,61862611]	NO	NO
Cortical surface area	14	59072226	14:59072226:T:G	1.76e-128	[58285531,61862611]	NO	NO
Cortical surface area	14	58698067	14:58698067:C:CAT	4.81e-13	[58285531,61862611]	NO	NO
Cortical surface area	14	58760461	14:58760461:C:CAT	2.08e-08	[58285531,61862611]	NO	NO
Cortical surface area	14	59060102	14:59060102:G:A	3.18e-10	[58285531,61862611]	NO	NO
Cortical surface area	14	58989516	14:58989516:T:G	5.23e-14	[58285531,61862611]	NO	NO
Cortical surface area	14	59083503	14:59083503:T:TTTAC	1.8e-12	[58285531,61862611]	NO	NO
Cortical surface area	14	59072860	14:59072860:C:T	4.82e-08	[58285531,61862611]	NO	NO
Cortical surface area	14	59073930	14:59073930:T:C	1.71e-09	[58285531,61862611]	NO	NO
Cortical surface area	14	59081450	14:59081450:G:GA	2.58e-08	[58285531,61862611]	NO	NO
Cortical surface area	14	59221309	14:59221309:G:A	1.71e-10	[58285531,61862611]	NO	NO
Cortical surface area	14	59492298	14:59492298:T:C	4.29e-28	[58285531,61862611]	NO	NO
Cortical surface area	14	59628609	14:59628609:C:T	1.98e-238	[58285531,61862611]	NO	NO
Cortical surface area	14	59519751	14:59519751:C:CT	3.12e-15	[58285531,61862611]	NO	NO
Cortical surface area	14	59737689	14:59737689:A:AT	2.03e-11	[58285531,61862611]	NO	NO
Cortical surface area	14	59624709	14:59624709:A:T	5.64e-26	[58285531,61862611]	NO	NO
Cortical surface area	14	59795713	14:59795713:A:G	2.2e-26	[58285531,61862611]	NO	NO
Cortical surface area	14	59631808	14:59631808:C:T	1.13e-15	[58285531,61862611]	NO	NO
Cortical surface area	14	59620217	14:59620217:T:C	1.92e-16	[58285531,61862611]	NO	NO
Cortical surface area	14	59544104	14:59544104:T:C	5.01e-15	[58285531,61862611]	NO	NO
Cortical surface area	14	59547296	14:59547296:TA:T	2.59e-12	[58285531,61862611]	NO	NO
Cortical surface area	14	59562592	14:59562592:A:G	1.15e-08	[58285531,61862611]	NO	NO
Cortical surface area	14	59697746	14:59697746:G:A	1.38e-53	[58285531,61862611]	NO	NO
Cortical surface area	14	59657870	14:59657870:C:T	1.69e-21	[58285531,61862611]	NO	NO
Cortical surface area	14	59633472	14:59633472:T:C	5.06e-11	[58285531,61862611]	NO	NO
Cortical surface area	14	60035521	14:60035521:G:A	7.11e-13	[58285531,61862611]	NO	NO
Cortical surface area	14	59739352	14:59739352:T:C	4.19e-17	[58285531,61862611]	NO	NO
Cortical surface area	14	59755578	14:59755578:C:A	3.13e-38	[58285531,61862611]	NO	NO
Cortical surface area	14	59776810	14:59776810:G:T	1.28e-11	[58285531,61862611]	NO	NO
Cortical surface area	14	59834017	14:59834017:T:G	2.21e-37	[58285531,61862611]	NO	NO
Cortical surface area	14	59828615	14:59828615:C:T	3.04e-13	[58285531,61862611]	NO	NO
Cortical surface area	14	59839736	14:59839736:CT:C	2.24e-16	[58285531,61862611]	NO	NO
Cortical surface area	14	59844463	14:59844463:A:G	8.49e-10	[58285531,61862611]	NO	NO
Cortical surface area	14	59880455	14:59880455:A:T	3.66e-21	[58285531,61862611]	NO	NO
Cortical surface area	14	59864709	14:59864709:T:A	1.4e-08	[58285531,61862611]	NO	NO
Cortical surface area	14	61591031	14:61591031:G:T	9.34e-12	[58285531,61862611]	NO	NO
Cortical surface area	14	68388271	14:68388271:G:A	2.01e-09	[68125615,69408128]	NO	NO
Cortical surface area	14	68764907	14:68764907:AG:A	6.16e-14	[68125615,69408128]	NO	NO
Cortical surface area	14	69019538	14:69019538:T:C	1.85e-18	[68125615,69408128]	NO	NO
Cortical surface area	14	69157092	14:69157092:A:G	1.49e-09	[68125615,69408128]	NO	NO
Cortical surface area	14	73343715	14:73343715:T:C	1.07e-10	[73091907,73635666]	NO	NO
Cortical surface area	14	75108290	14:75108290:T:C	1.67e-09	[74834694,75691795]	NO	NO
Cortical surface area	14	75430033	14:75430033:A:G	4.31e-08	[74834694,75691795]	NO	NO
Cortical surface area	14	81667611	14:81667611:C:G	2.43e-10	[81387074,81966781]	NO	NO
Cortical surface area	14	84898489	14:84898489:G:T	1.08e-08	[84622376,85996316]	NO	NO
Cortical surface area	14	85388938	14:85388938:A:C	4.52e-14	[84622376,85996316]	NO	NO
Cortical surface area	14	85729632	14:85729632:G:T	5.26e-19	[84622376,85996316]	NO	NO
Cortical surface area	14	89044004	14:89044004:G:T	2.34e-10	[88572068,89602730]	NO	NO
Cortical surface area	14	91881751	14:91881751:T:C	1.86e-20	[91609501,92335967]	NO	NO
Cortical surface area	14	94844947	14:94844947:T:C	5.37e-25	[94506943,95804142]	NO	NO
Cortical surface area	14	94784618	14:94784618:T:C	5.11e-09	[94506943,95804142]	NO	NO
Cortical surface area	14	95179707	14:95179707:T:C	3.34e-08	[94506943,95804142]	NO	NO
Cortical surface area	14	95334859	14:95334859:T:C	2.75e-11	[94506943,95804142]	NO	NO
Cortical surface area	14	95334131	14:95334131:T:C	3.8e-12	[94506943,95804142]	NO	NO
Cortical surface area	14	95554142	14:95554142:C:T	5.28e-09	[94506943,95804142]	NO	NO
Cortical surface area	14	98379218	14:98379218:A:C	9.5e-22	[98092603,98971464]	NO	NO
Cortical surface area	14	98548516	14:98548516:G:A	3.28e-18	[98092603,98971464]	NO	NO
Cortical surface area	14	98495275	14:98495275:G:C	2.92e-08	[98092603,98971464]	NO	NO
Cortical surface area	14	98500865	14:98500865:A:G	3.1e-11	[98092603,98971464]	NO	NO
Cortical surface area	14	99667179	14:99667179:A:G	7.58e-15	[99409206,100660206]	NO	NO
Cortical surface area	14	99741074	14:99741074:G:C	4.3e-31	[99409206,100660206]	NO	NO
Cortical surface area	14	100263611	14:100263611:G:T	1.12e-17	[99409206,100660206]	NO	NO
Cortical surface area	14	100279692	14:100279692:G:T	2.06e-09	[99409206,100660206]	NO	NO
Cortical surface area	14	100383676	14:100383676:G:A	1.6e-11	[99409206,100660206]	NO	NO
Cortical surface area	14	100358866	14:100358866:A:G	4.57e-39	[99409206,100660206]	NO	NO
Cortical surface area	14	100320764	14:100320764:A:G	4.94e-08	[99409206,100660206]	NO	NO
Cortical surface area	14	103791917	14:103791917:T:C	1.76e-13	[103532099,104436876]	NO	NO
Cortical surface area	14	104011494	14:104011494:T:C	1.13e-16	[103532099,104436876]	NO	NO
Cortical surface area	14	104167545	14:104167545:A:G	1.36e-12	[103532099,104436876]	NO	NO
Cortical surface area	14	105629257	14:105629257:AC:A	9.8e-12	[105359335,105898963]	NO	NO
Cortical surface area	15	30208812	15:30208812:T:C	2.07e-11	[29950874,30473508]	NO	NO
Cortical surface area	15	32999483	15:32999483:A:G	2.05e-09	[32745468,33259574]	YES	NO
Cortical surface area	15	34659517	15:34659517:C:G	4.28e-08	[34409517,34909517]	YES	YES
Cortical surface area	15	36731309	15:36731309:T:C	1.46e-19	[36445877,37632286]	NO	NO
Cortical surface area	15	37193851	15:37193851:C:T	5.2e-12	[36445877,37632286]	NO	NO
Cortical surface area	15	37191961	15:37191961:A:G	3.47e-09	[36445877,37632286]	NO	NO
Cortical surface area	15	37222961	15:37222961:C:T	6.21e-09	[36445877,37632286]	NO	NO
Cortical surface area	15	37278187	15:37278187:C:T	3.39e-18	[36445877,37632286]	NO	NO
Cortical surface area	15	37278160	15:37278160:C:T	3.26e-10	[36445877,37632286]	NO	NO
Cortical surface area	15	37382286	15:37382286:A:G	2.77e-08	[36445877,37632286]	NO	NO
Cortical surface area	15	38362447	15:38362447:A:G	2.17e-08	[38103901,38612447]	NO	NO
Cortical surface area	15	39104307	15:39104307:G:A	7.36e-56	[38797766,40454773]	NO	NO
Cortical surface area	15	39261306	15:39261306:T:TAA	5.92e-16	[38797766,40454773]	NO	NO
Cortical surface area	15	39375751	15:39375751:G:A	4.07e-61	[38797766,40454773]	NO	NO
Cortical surface area	15	39509914	15:39509914:C:T	2.64e-17	[38797766,40454773]	NO	NO
Cortical surface area	15	39482575	15:39482575:T:C	3e-25	[38797766,40454773]	NO	NO
Cortical surface area	15	39662900	15:39662900:T:C	7.45e-35	[38797766,40454773]	NO	NO
Cortical surface area	15	39598407	15:39598407:C:T	8.87e-20	[38797766,40454773]	NO	NO
Cortical surface area	15	39521402	15:39521402:G:A	2.56e-14	[38797766,40454773]	NO	NO
Cortical surface area	15	39634303	15:39634303:C:T	7.3e-117	[38797766,40454773]	NO	NO
Cortical surface area	15	39595340	15:39595340:G:A	3.38e-148	[38797766,40454773]	NO	NO
Cortical surface area	15	39558866	15:39558866:C:CAT	1.14e-16	[38797766,40454773]	NO	NO
Cortical surface area	15	39627855	15:39627855:T:C	2.38e-47	[38797766,40454773]	NO	NO
Cortical surface area	15	39636877	15:39636877:T:C	0	[38797766,40454773]	NO	NO
Cortical surface area	15	39593106	15:39593106:C:T	1.99e-14	[38797766,40454773]	NO	NO
Cortical surface area	15	39569843	15:39569843:TA:T	3.52e-08	[38797766,40454773]	NO	NO
Cortical surface area	15	39576705	15:39576705:C:T	4.5e-08	[38797766,40454773]	NO	NO
Cortical surface area	15	39613763	15:39613763:C:T	2.19e-11	[38797766,40454773]	NO	NO
Cortical surface area	15	39637355	15:39637355:T:C	1.2e-64	[38797766,40454773]	NO	NO
Cortical surface area	15	39634221	15:39634221:TGAGTGA:T	1.41e-82	[38797766,40454773]	NO	NO
Cortical surface area	15	39671514	15:39671514:C:T	2.85e-24	[38797766,40454773]	NO	NO
Cortical surface area	15	39640301	15:39640301:T:C	6.32e-49	[38797766,40454773]	NO	NO
Cortical surface area	15	39667882	15:39667882:G:T	1.16e-08	[38797766,40454773]	NO	NO
Cortical surface area	15	39652450	15:39652450:A:G	4.31e-28	[38797766,40454773]	NO	NO
Cortical surface area	15	39665537	15:39665537:A:G	6.15e-23	[38797766,40454773]	NO	NO
Cortical surface area	15	39742570	15:39742570:C:T	2.74e-69	[38797766,40454773]	NO	NO
Cortical surface area	15	39698737	15:39698737:G:A	9.45e-11	[38797766,40454773]	NO	NO
Cortical surface area	15	39809640	15:39809640:A:C	2.28e-38	[38797766,40454773]	NO	NO
Cortical surface area	15	39702365	15:39702365:A:C	5.45e-10	[38797766,40454773]	NO	NO
Cortical surface area	15	39989619	15:39989619:G:A	7.8e-29	[38797766,40454773]	NO	NO
Cortical surface area	15	39825722	15:39825722:T:C	3.35e-09	[38797766,40454773]	NO	NO
Cortical surface area	15	40017333	15:40017333:G:A	2.37e-11	[38797766,40454773]	NO	NO
Cortical surface area	15	40122373	15:40122373:C:T	3.96e-12	[38797766,40454773]	NO	NO
Cortical surface area	15	40204773	15:40204773:T:C	1.15e-10	[38797766,40454773]	NO	NO
Cortical surface area	15	41047024	15:41047024:A:G	2.45e-08	[40788693,41297024]	YES	YES
Cortical surface area	15	48862043	15:48862043:A:G	6.82e-11	[48449486,49323903]	NO	NO
Cortical surface area	15	49013011	15:49013011:G:A	2.85e-12	[48449486,49323903]	NO	NO
Cortical surface area	15	52102330	15:52102330:GT:G	7.51e-10	[51764958,52444840]	YES	NO
Cortical surface area	15	55873235	15:55873235:G:T	1.16e-09	[55583521,56571602]	NO	NO
Cortical surface area	15	55968539	15:55968539:A:G	1.05e-58	[55583521,56571602]	NO	NO
Cortical surface area	15	56111324	15:56111324:C:T	3.32e-20	[55583521,56571602]	NO	NO
Cortical surface area	15	58055042	15:58055042:T:A	3.08e-08	[57798608,58679264]	NO	NO
Cortical surface area	15	58241022	15:58241022:T:C	3.78e-38	[57798608,58679264]	NO	NO
Cortical surface area	15	63293082	15:63293082:C:T	8.49e-29	[63020947,64348694]	NO	NO
Cortical surface area	15	63329875	15:63329875:A:C	9.13e-20	[63020947,64348694]	NO	NO
Cortical surface area	15	63311196	15:63311196:C:T	3.25e-08	[63020947,64348694]	NO	NO
Cortical surface area	15	63441248	15:63441248:G:C	4.31e-08	[63020947,64348694]	NO	NO
Cortical surface area	15	63874881	15:63874881:T:A	1.48e-10	[63020947,64348694]	NO	NO
Cortical surface area	15	63904110	15:63904110:A:G	2.06e-08	[63020947,64348694]	NO	NO
Cortical surface area	15	66086188	15:66086188:G:A	5.23e-10	[65462291,66365062]	YES	YES
Cortical surface area	15	67457698	15:67457698:G:A	6.22e-14	[67207698,67707698]	NO	NO
Cortical surface area	15	70699753	15:70699753:C:CTTAA	6.27e-24	[70421695,70979793]	NO	NO
Cortical surface area	15	71517745	15:71517745:T:G	3.69e-12	[71258067,72142561]	NO	NO
Cortical surface area	15	71606121	15:71606121:T:C	3.15e-15	[71258067,72142561]	NO	NO
Cortical surface area	15	71621562	15:71621562:C:T	1.57e-20	[71258067,72142561]	NO	NO
Cortical surface area	15	71696886	15:71696886:G:A	2.57e-10	[71258067,72142561]	NO	NO
Cortical surface area	15	71860977	15:71860977:T:C	3.79e-13	[71258067,72142561]	NO	NO
Cortical surface area	15	73491678	15:73491678:G:A	5.26e-12	[72924114,73876970]	NO	NO
Cortical surface area	15	73197003	15:73197003:A:G	1.58e-08	[72924114,73876970]	NO	NO
Cortical surface area	15	74521454	15:74521454:A:G	5.21e-10	[74239207,75698813]	NO	NO
Cortical surface area	15	74614271	15:74614271:G:A	3.53e-10	[74239207,75698813]	NO	NO
Cortical surface area	15	75448452	15:75448452:T:C	5.64e-10	[74239207,75698813]	NO	NO
Cortical surface area	15	77274180	15:77274180:AT:A	1.08e-09	[77024180,77625090]	YES	NO
Cortical surface area	15	79064667	15:79064667:G:A	3.68e-13	[78706806,79324518]	YES	NO
Cortical surface area	15	81042816	15:81042816:G:A	1.61e-09	[80743277,81303435]	NO	NO
Cortical surface area	15	85590186	15:85590186:G:A	1e-09	[85281253,86494665]	YES	NO
Cortical surface area	15	86162874	15:86162874:A:G	3.65e-10	[85281253,86494665]	YES	NO
Cortical surface area	15	87976206	15:87976206:A:T	1.18e-27	[87660115,88282107]	NO	NO
Cortical surface area	15	90128966	15:90128966:T:C	9.76e-13	[89831905,90445712]	NO	NO
Cortical surface area	15	91009484	15:91009484:A:G	8.59e-09	[90759484,91811182]	NO	NO
Cortical surface area	15	91103686	15:91103686:T:C	1.77e-08	[90759484,91811182]	NO	NO
Cortical surface area	15	91426560	15:91426560:A:G	4.84e-27	[90759484,91811182]	NO	NO
Cortical surface area	15	91528070	15:91528070:G:C	3.74e-11	[90759484,91811182]	NO	NO
Cortical surface area	15	93574479	15:93574479:A:G	3.4e-08	[93324479,93824479]	YES	YES
Cortical surface area	15	94952740	15:94952740:A:G	1.33e-13	[94683032,95246550]	NO	NO
Cortical surface area	15	95826797	15:95826797:C:T	4.09e-18	[95576797,97128437]	NO	NO
Cortical surface area	15	96170743	15:96170743:G:T	4.81e-09	[95576797,97128437]	YES	NO
Cortical surface area	15	96629651	15:96629651:A:G	3.06e-08	[95576797,97128437]	NO	NO
Cortical surface area	15	96878437	15:96878437:C:T	3e-11	[95576797,97128437]	NO	NO
Cortical surface area	15	98304530	15:98304530:A:G	3.97e-17	[98028469,98696241]	NO	NO
Cortical surface area	15	98433406	15:98433406:T:C	1.15e-44	[98028469,98696241]	NO	NO
Cortical surface area	15	99186731	15:99186731:A:G	4.27e-09	[98924828,99445162]	NO	NO
Cortical surface area	15	101953030	15:101953030:A:G	2.71e-12	[101699533,102212795]	YES	YES
Cortical surface area	16	2161796	16:2161796:A:G	8.85e-14	[1882731,2450184]	NO	NO
Cortical surface area	16	3881494	16:3881494:C:T	1.2e-11	[3617081,4617662]	NO	NO
Cortical surface area	16	4345746	16:4345746:C:T	2.78e-27	[3617081,4617662]	NO	NO
Cortical surface area	16	19534925	16:19534925:T:C	3.62e-12	[19208319,19862328]	YES	NO
Cortical surface area	16	24854236	16:24854236:T:C	1.06e-23	[24448903,25138115]	NO	NO
Cortical surface area	16	28837906	16:28837906:G:A	1.52e-33	[28083411,29251460]	NO	NO
Cortical surface area	16	30120372	16:30120372:T:C	4.25e-11	[29853160,30630486]	NO	NO
Cortical surface area	16	31132250	16:31132250:G:A	1.79e-09	[30829834,31404146]	NO	NO
Cortical surface area	16	49444746	16:49444746:G:A	1.14e-10	[49194746,49908044]	NO	NO
Cortical surface area	16	49547911	16:49547911:C:T	1.23e-13	[49194746,49908044]	NO	NO
Cortical surface area	16	49561498	16:49561498:A:G	5.7e-10	[49194746,49908044]	NO	NO
Cortical surface area	16	49638616	16:49638616:G:A	1.06e-12	[49194746,49908044]	NO	NO
Cortical surface area	16	51187142	16:51187142:A:G	1.66e-21	[50913406,51808545]	NO	NO
Cortical surface area	16	51482321	16:51482321:A:G	3e-14	[50913406,51808545]	NO	NO
Cortical surface area	16	51487474	16:51487474:G:GC	1.07e-08	[50913406,51808545]	NO	NO
Cortical surface area	16	51502004	16:51502004:T:C	6.22e-09	[50913406,51808545]	NO	NO
Cortical surface area	16	51554998	16:51554998:A:G	7.61e-10	[50913406,51808545]	NO	NO
Cortical surface area	16	52571533	16:52571533:G:A	1.24e-24	[52286885,52898731]	NO	NO
Cortical surface area	16	64985093	16:64985093:G:A	9.65e-28	[64666276,65384457]	NO	NO
Cortical surface area	16	69112152	16:69112152:A:G	4.17e-23	[68647885,69669394]	NO	NO
Cortical surface area	16	69141138	16:69141138:T:C	4.33e-12	[68647885,69669394]	NO	NO
Cortical surface area	16	69300569	16:69300569:A:G	6.33e-10	[68647885,69669394]	NO	NO
Cortical surface area	16	70656768	16:70656768:A:T	1.73e-16	[70268934,71002326]	NO	NO
Cortical surface area	16	70548297	16:70548297:A:G	2.88e-10	[70268934,71002326]	NO	NO
Cortical surface area	16	70723925	16:70723925:G:A	2.05e-11	[70268934,71002326]	NO	NO
Cortical surface area	16	71654550	16:71654550:T:C	3.94e-08	[71404550,71904550]	YES	YES
Cortical surface area	16	73096750	16:73096750:T:C	1.06e-19	[72840039,73356038]	NO	NO
Cortical surface area	16	77224889	16:77224889:T:G	4.37e-08	[76974827,77752996]	NO	NO
Cortical surface area	16	77320605	16:77320605:G:A	9.55e-21	[76974827,77752996]	NO	NO
Cortical surface area	16	77499575	16:77499575:G:A	3.37e-08	[76974827,77752996]	NO	NO
Cortical surface area	16	78214294	16:78214294:T:C	2.14e-12	[77922493,78495520]	NO	NO
Cortical surface area	16	85627514	16:85627514:T:TG	2.37e-09	[85377514,85877514]	YES	NO
Cortical surface area	16	86710660	16:86710660:G:A	1.23e-33	[86424726,87572169]	NO	NO
Cortical surface area	16	87225264	16:87225264:T:C	3.91e-72	[86424726,87572169]	NO	NO
Cortical surface area	16	89608342	16:89608342:C:T	9.33e-09	[89260494,90260303]	NO	NO
Cortical surface area	16	89807785	16:89807785:T:C	3.82e-13	[89260494,90260303]	NO	NO
Cortical surface area	16	89704365	16:89704365:C:G	2.95e-11	[89260494,90260303]	NO	NO
Cortical surface area	16	89724268	16:89724268:T:C	2.49e-09	[89260494,90260303]	NO	NO
Cortical surface area	17	926121	17:926121:A:G	3.07e-14	[675006,1179741]	YES	NO
Cortical surface area	17	2010318	17:2010318:T:C	2.78e-20	[1674927,2821489]	NO	NO
Cortical surface area	17	2107090	17:2107090:T:C	1.36e-40	[1674927,2821489]	NO	NO
Cortical surface area	17	2102962	17:2102962:A:G	1.57e-10	[1674927,2821489]	NO	NO
Cortical surface area	17	1997083	17:1997083:T:TA	7.3e-11	[1674927,2821489]	NO	NO
Cortical surface area	17	2555592	17:2555592:T:C	1.15e-12	[1674927,2821489]	NO	NO
Cortical surface area	17	7129898	17:7129898:A:G	3.71e-11	[6856475,8470357]	NO	NO
Cortical surface area	17	7164563	17:7164563:T:C	1.13e-09	[6856475,8470357]	NO	NO
Cortical surface area	17	7215536	17:7215536:C:T	2.45e-10	[6856475,8470357]	NO	NO
Cortical surface area	17	7443740	17:7443740:A:G	6.85e-15	[6856475,8470357]	NO	NO
Cortical surface area	17	7571752	17:7571752:G:T	1.3e-08	[6856475,8470357]	NO	NO
Cortical surface area	17	7754993	17:7754993:A:G	2.95e-15	[6856475,8470357]	NO	NO
Cortical surface area	17	8220357	17:8220357:G:A	4.83e-08	[6856475,8470357]	NO	NO
Cortical surface area	17	8948541	17:8948541:T:C	1.43e-15	[8651068,9524797]	NO	NO
Cortical surface area	17	8965856	17:8965856:A:G	1.08e-09	[8651068,9524797]	NO	NO
Cortical surface area	17	9151754	17:9151754:A:G	1.27e-13	[8651068,9524797]	NO	NO
Cortical surface area	17	9129603	17:9129603:T:C	6.04e-10	[8651068,9524797]	NO	NO
Cortical surface area	17	9274239	17:9274239:GA:G	7.31e-09	[8651068,9524797]	NO	NO
Cortical surface area	17	10129414	17:10129414:T:A	4.39e-09	[9860014,10392850]	NO	NO
Cortical surface area	17	13047713	17:13047713:T:C	1.52e-24	[12789467,13349547]	NO	NO
Cortical surface area	17	14302800	17:14302800:C:T	3.55e-23	[14049892,14800531]	NO	NO
Cortical surface area	17	14536283	17:14536283:G:A	9.81e-12	[14049892,14800531]	NO	NO
Cortical surface area	17	16005187	17:16005187:C:T	1.2e-19	[15618291,16513682]	NO	NO
Cortical surface area	17	16945586	17:16945586:G:T	1.77e-18	[16693623,17374625]	NO	NO
Cortical surface area	17	18115708	17:18115708:A:ACT	5.3e-09	[17790404,18413262]	YES	NO
Cortical surface area	17	19299051	17:19299051:T:TG	4.07e-08	[18967683,20652493]	NO	NO
Cortical surface area	17	19877634	17:19877634:C:T	1.42e-21	[18967683,20652493]	NO	NO
Cortical surface area	17	27564013	17:27564013:T:C	5.22e-14	[27163115,30637050]	NO	NO
Cortical surface area	17	27714683	17:27714683:C:A	1.53e-12	[27163115,30637050]	NO	NO
Cortical surface area	17	28268800	17:28268800:C:A	5.45e-57	[27163115,30637050]	NO	NO
Cortical surface area	17	28111418	17:28111418:C:T	3.97e-09	[27163115,30637050]	NO	NO
Cortical surface area	17	29181220	17:29181220:AT:A	1.99e-13	[27163115,30637050]	NO	NO
Cortical surface area	17	28640992	17:28640992:C:G	1.52e-09	[27163115,30637050]	NO	NO
Cortical surface area	17	29680526	17:29680526:G:C	3.64e-11	[27163115,30637050]	NO	NO
Cortical surface area	17	29827429	17:29827429:A:G	7.24e-11	[27163115,30637050]	NO	NO
Cortical surface area	17	30185565	17:30185565:A:G	3.22e-10	[27163115,30637050]	NO	NO
Cortical surface area	17	36592034	17:36592034:A:G	3.69e-08	[36335613,37996847]	NO	NO
Cortical surface area	17	36879668	17:36879668:C:T	2.06e-19	[36335613,37996847]	NO	NO
Cortical surface area	17	37039697	17:37039697:T:C	1.81e-09	[36335613,37996847]	NO	NO
Cortical surface area	17	37717280	17:37717280:T:C	6.17e-10	[36335613,37996847]	YES	YES
Cortical surface area	17	39920321	17:39920321:A:G	3.79e-08	[39670321,40170321]	YES	YES
Cortical surface area	17	40706273	17:40706273:A:C	2.83e-14	[40321284,41074834]	NO	NO
Cortical surface area	17	42294215	17:42294215:A:G	5.78e-23	[41906471,46207499]	NO	NO
Cortical surface area	17	42523628	17:42523628:A:G	6.39e-12	[41906471,46207499]	NO	NO
Cortical surface area	17	42645309	17:42645309:T:C	1.43e-09	[41906471,46207499]	NO	NO
Cortical surface area	17	42705926	17:42705926:G:T	1.97e-09	[41906471,46207499]	NO	NO
Cortical surface area	17	43231991	17:43231991:G:T	8.64e-15	[41906471,46207499]	NO	NO
Cortical surface area	17	43055579	17:43055579:A:C	9.93e-09	[41906471,46207499]	NO	NO
Cortical surface area	17	43403777	17:43403777:C:A	2.62e-10	[41906471,46207499]	NO	NO
Cortical surface area	17	43369980	17:43369980:G:C	1.95e-10	[41906471,46207499]	NO	NO
Cortical surface area	17	43900434	17:43900434:G:A	9.93e-149	[41906471,46207499]	NO	NO
Cortical surface area	17	44819595	17:44819595:G:T	1.48e-84	[41906471,46207499]	NO	NO
Cortical surface area	17	43471481	17:43471481:A:G	1.2e-09	[41906471,46207499]	NO	NO
Cortical surface area	17	43461346	17:43461346:A:C	2.09e-09	[41906471,46207499]	NO	NO
Cortical surface area	17	43677790	17:43677790:C:T	3.31e-24	[41906471,46207499]	NO	NO
Cortical surface area	17	43511301	17:43511301:T:C	1.48e-28	[41906471,46207499]	NO	NO
Cortical surface area	17	43516175	17:43516175:A:G	3.27e-12	[41906471,46207499]	NO	NO
Cortical surface area	17	43926458	17:43926458:T:C	1.04e-16	[41906471,46207499]	NO	NO
Cortical surface area	17	43575228	17:43575228:C:T	1.83e-33	[41906471,46207499]	NO	NO
Cortical surface area	17	43604278	17:43604278:A:G	3.53e-26	[41906471,46207499]	NO	NO
Cortical surface area	17	43657894	17:43657894:G:A	4.23e-08	[41906471,46207499]	NO	NO
Cortical surface area	17	43672331	17:43672331:G:T	1.43e-19	[41906471,46207499]	NO	NO
Cortical surface area	17	43673025	17:43673025:C:A	1.16e-10	[41906471,46207499]	NO	NO
Cortical surface area	17	43696532	17:43696532:G:A	9.02e-21	[41906471,46207499]	NO	NO
Cortical surface area	17	43702019	17:43702019:A:G	1.78e-23	[41906471,46207499]	NO	NO
Cortical surface area	17	43702474	17:43702474:A:G	4.6e-16	[41906471,46207499]	NO	NO
Cortical surface area	17	43707839	17:43707839:T:G	2.21e-12	[41906471,46207499]	NO	NO
Cortical surface area	17	43710833	17:43710833:T:C	1.57e-09	[41906471,46207499]	NO	NO
Cortical surface area	17	43712619	17:43712619:T:A	2.55e-12	[41906471,46207499]	NO	NO
Cortical surface area	17	43730553	17:43730553:TTG:T	2.41e-08	[41906471,46207499]	NO	NO
Cortical surface area	17	43926777	17:43926777:T:A	1.91e-12	[41906471,46207499]	NO	NO
Cortical surface area	17	44330413	17:44330413:A:C	1.58e-15	[41906471,46207499]	NO	NO
Cortical surface area	17	43981642	17:43981642:G:A	4.8e-09	[41906471,46207499]	NO	NO
Cortical surface area	17	43992839	17:43992839:T:TG	2.47e-15	[41906471,46207499]	NO	NO
Cortical surface area	17	44121579	17:44121579:C:T	7.5e-23	[41906471,46207499]	NO	NO
Cortical surface area	17	44004302	17:44004302:T:C	1.21e-21	[41906471,46207499]	NO	NO
Cortical surface area	17	44012258	17:44012258:C:G	1.07e-17	[41906471,46207499]	NO	NO
Cortical surface area	17	44051714	17:44051714:C:T	1.46e-08	[41906471,46207499]	NO	NO
Cortical surface area	17	44084320	17:44084320:A:T	3.25e-14	[41906471,46207499]	NO	NO
Cortical surface area	17	44097378	17:44097378:A:AC	1.81e-17	[41906471,46207499]	NO	NO
Cortical surface area	17	44119282	17:44119282:A:T	2.73e-11	[41906471,46207499]	NO	NO
Cortical surface area	17	44132221	17:44132221:CT:C	1.09e-08	[41906471,46207499]	NO	NO
Cortical surface area	17	44132237	17:44132237:T:G	3.9e-18	[41906471,46207499]	NO	NO
Cortical surface area	17	44152803	17:44152803:A:AGTGATTCTT	1.35e-22	[41906471,46207499]	NO	NO
Cortical surface area	17	44153861	17:44153861:C:CA	7.22e-09	[41906471,46207499]	NO	NO
Cortical surface area	17	44163549	17:44163549:A:G	9.98e-10	[41906471,46207499]	NO	NO
Cortical surface area	17	44270503	17:44270503:AGGGC:A	3.69e-13	[41906471,46207499]	NO	NO
Cortical surface area	17	44281544	17:44281544:T:C	1.55e-14	[41906471,46207499]	NO	NO
Cortical surface area	17	44294476	17:44294476:C:CAA	3.97e-30	[41906471,46207499]	NO	NO
Cortical surface area	17	44297728	17:44297728:C:G	1.06e-10	[41906471,46207499]	NO	NO
Cortical surface area	17	44362049	17:44362049:TA:T	2.76e-39	[41906471,46207499]	NO	NO
Cortical surface area	17	44353261	17:44353261:C:T	2.58e-22	[41906471,46207499]	NO	NO
Cortical surface area	17	44737534	17:44737534:T:G	8.19e-11	[41906471,46207499]	NO	NO
Cortical surface area	17	44570525	17:44570525:C:CT	5.88e-15	[41906471,46207499]	NO	NO
Cortical surface area	17	44663746	17:44663746:TCA:T	1.73e-15	[41906471,46207499]	NO	NO
Cortical surface area	17	44793105	17:44793105:A:AT	1.73e-08	[41906471,46207499]	NO	NO
Cortical surface area	17	44888742	17:44888742:T:C	4.56e-19	[41906471,46207499]	NO	NO
Cortical surface area	17	45045894	17:45045894:T:C	1.34e-08	[41906471,46207499]	NO	NO
Cortical surface area	17	45675925	17:45675925:G:A	4.49e-17	[41906471,46207499]	NO	NO
Cortical surface area	17	45701731	17:45701731:C:T	1.92e-08	[41906471,46207499]	NO	NO
Cortical surface area	17	47091420	17:47091420:T:C	1.45e-27	[46585629,47711433]	NO	NO
Cortical surface area	17	46935180	17:46935180:CA:C	7.71e-09	[46585629,47711433]	NO	NO
Cortical surface area	17	47124652	17:47124652:G:A	1.1e-11	[46585629,47711433]	NO	NO
Cortical surface area	17	47379486	17:47379486:C:T	3.49e-22	[46585629,47711433]	NO	NO
Cortical surface area	17	48229074	17:48229074:CGTTTA:C	4.29e-09	[47979074,48488294]	YES	NO
Cortical surface area	17	60637258	17:60637258:A:C	1.55e-15	[60371866,61450132]	NO	NO
Cortical surface area	17	61141953	17:61141953:G:A	4.6e-12	[60371866,61450132]	NO	NO
Cortical surface area	17	62479273	17:62479273:C:A	8.33e-12	[62218575,62752435]	YES	YES
Cortical surface area	17	63283590	17:63283590:G:T	1.02e-09	[63004193,64500605]	NO	NO
Cortical surface area	17	63528950	17:63528950:G:A	3.05e-10	[63004193,64500605]	NO	NO
Cortical surface area	17	63556402	17:63556402:G:C	9.23e-09	[63004193,64500605]	NO	NO
Cortical surface area	17	63914750	17:63914750:G:A	1.02e-33	[63004193,64500605]	NO	NO
Cortical surface area	17	63966476	17:63966476:T:C	8.9e-15	[63004193,64500605]	NO	NO
Cortical surface area	17	65962238	17:65962238:G:T	8.42e-40	[65514164,66414918]	NO	NO
Cortical surface area	17	68060451	17:68060451:T:A	1.68e-11	[67810451,69492932]	NO	NO
Cortical surface area	17	68511145	17:68511145:A:G	6.74e-11	[67810451,69492932]	NO	NO
Cortical surface area	17	68820526	17:68820526:T:A	4.78e-08	[67810451,69492932]	NO	NO
Cortical surface area	17	69127568	17:69127568:T:C	7.21e-34	[67810451,69492932]	NO	NO
Cortical surface area	17	73498652	17:73498652:A:G	3.44e-08	[73248652,73748652]	YES	YES
Cortical surface area	17	75406045	17:75406045:G:T	4.2e-09	[75149117,75670165]	NO	NO
Cortical surface area	17	77778227	17:77778227:C:T	1.61e-15	[77518654,78050743]	NO	NO
Cortical surface area	17	79372572	17:79372572:C:CGGGCCTCCG	2.04e-11	[79106018,80184194]	NO	NO
Cortical surface area	17	79429358	17:79429358:C:T	1.86e-08	[79106018,80184194]	NO	NO
Cortical surface area	17	79530993	17:79530993:T:G	1.93e-17	[79106018,80184194]	NO	NO
Cortical surface area	17	79934194	17:79934194:A:C	1.17e-08	[79106018,80184194]	NO	NO
Cortical surface area	18	334742	18:334742:T:C	8.26e-22	[68966,599426]	NO	NO
Cortical surface area	18	6723282	18:6723282:TCTA:T	1.83e-09	[6473282,7284932]	NO	NO
Cortical surface area	18	7033900	18:7033900:C:A	1.34e-10	[6473282,7284932]	NO	NO
Cortical surface area	18	7586782	18:7586782:T:C	1.62e-16	[7286612,7880982]	NO	NO
Cortical surface area	18	10430707	18:10430707:G:A	2.64e-12	[10179422,10711157]	NO	NO
Cortical surface area	18	13505939	18:13505939:T:C	3.75e-08	[13255939,13755939]	YES	YES
Cortical surface area	18	22353868	18:22353868:G:C	9.96e-12	[21982265,22644265]	NO	NO
Cortical surface area	18	31782558	18:31782558:G:C	4.45e-08	[31532558,32032558]	YES	YES
Cortical surface area	18	32720189	18:32720189:G:A	1.12e-10	[32363239,33224005]	YES	NO
Cortical surface area	18	39935948	18:39935948:T:C	3.99e-09	[39657414,40615619]	NO	NO
Cortical surface area	18	40241623	18:40241623:T:C	1.97e-20	[39657414,40615619]	NO	NO
Cortical surface area	18	41157585	18:41157585:C:T	5.61e-09	[40906778,41804342]	YES	NO
Cortical surface area	18	41523278	18:41523278:T:C	2.43e-09	[40906778,41804342]	YES	NO
Cortical surface area	18	42872116	18:42872116:A:G	3.13e-08	[42619077,43122116]	NO	NO
Cortical surface area	18	52027942	18:52027942:G:T	2.94e-13	[51708169,52302954]	NO	NO
Cortical surface area	18	52949770	18:52949770:T:C	1.99e-18	[52621764,53760595]	NO	NO
Cortical surface area	18	53413566	18:53413566:T:G	1.31e-11	[52621764,53760595]	NO	NO
Cortical surface area	18	60720067	18:60720067:T:G	2.35e-14	[60456188,61278825]	NO	NO
Cortical surface area	18	61028825	18:61028825:A:G	1.13e-08	[60456188,61278825]	NO	NO
Cortical surface area	18	73371110	18:73371110:T:G	1.32e-09	[73116794,73621110]	YES	YES
Cortical surface area	18	74072245	18:74072245:T:A	1.27e-10	[73821782,74454354]	YES	NO
Cortical surface area	18	74204354	18:74204354:C:G	4.76e-09	[73821782,74454354]	YES	NO
Cortical surface area	18	76461168	18:76461168:C:T	8.42e-11	[76211168,76711168]	NO	NO
Cortical surface area	19	810445	19:810445:T:C	6.56e-11	[544670,1070300]	NO	NO
Cortical surface area	19	3295428	19:3295428:C:T	1.43e-08	[3045428,3712045]	NO	NO
Cortical surface area	19	3459040	19:3459040:C:T	9.99e-12	[3045428,3712045]	NO	NO
Cortical surface area	19	4058652	19:4058652:C:T	3.81e-08	[3808652,5217739]	NO	NO
Cortical surface area	19	4407141	19:4407141:A:G	1.76e-17	[3808652,5217739]	NO	NO
Cortical surface area	19	4372579	19:4372579:G:A	1.79e-10	[3808652,5217739]	NO	NO
Cortical surface area	19	4940630	19:4940630:A:G	8.96e-12	[3808652,5217739]	NO	NO
Cortical surface area	19	4911796	19:4911796:T:C	1.23e-09	[3808652,5217739]	NO	NO
Cortical surface area	19	7608135	19:7608135:A:C	1.5e-09	[7356908,7859006]	YES	YES
Cortical surface area	19	13109955	19:13109955:T:C	1.89e-82	[12463636,13555241]	NO	NO
Cortical surface area	19	12922503	19:12922503:G:A	4.62e-15	[12463636,13555241]	NO	NO
Cortical surface area	19	12820174	19:12820174:CAAAT:C	7e-09	[12463636,13555241]	NO	NO
Cortical surface area	19	13021359	19:13021359:A:G	3.04e-19	[12463636,13555241]	NO	NO
Cortical surface area	19	13151477	19:13151477:C:T	2.55e-21	[12463636,13555241]	NO	NO
Cortical surface area	19	13083967	19:13083967:T:C	1.73e-22	[12463636,13555241]	NO	NO
Cortical surface area	19	13207284	19:13207284:C:G	1.24e-16	[12463636,13555241]	NO	NO
Cortical surface area	19	13231918	19:13231918:C:T	1.75e-11	[12463636,13555241]	NO	NO
Cortical surface area	19	13287413	19:13287413:A:ACTGT	2.56e-28	[12463636,13555241]	NO	NO
Cortical surface area	19	13284603	19:13284603:C:T	2.39e-10	[12463636,13555241]	NO	NO
Cortical surface area	19	13934296	19:13934296:G:A	5.33e-27	[13636994,14241136]	NO	NO
Cortical surface area	19	13958508	19:13958508:AC:A	4.87e-09	[13636994,14241136]	NO	NO
Cortical surface area	19	17100550	19:17100550:T:A	2.54e-09	[16850550,17804425]	NO	NO
Cortical surface area	19	17110326	19:17110326:T:C	5.49e-11	[16850550,17804425]	NO	NO
Cortical surface area	19	17165440	19:17165440:C:T	1.7e-10	[16850550,17804425]	NO	NO
Cortical surface area	19	17554097	19:17554097:T:A	7.54e-09	[16850550,17804425]	NO	NO
Cortical surface area	19	18467322	19:18467322:T:C	8.98e-16	[18199238,18886814]	NO	NO
Cortical surface area	19	18576484	19:18576484:C:T	4.14e-19	[18199238,18886814]	NO	NO
Cortical surface area	19	19393657	19:19393657:C:T	2.08e-17	[19100103,20031917]	NO	NO
Cortical surface area	19	19562349	19:19562349:A:G	8.4e-16	[19100103,20031917]	NO	NO
Cortical surface area	19	23927741	19:23927741:C:CCA	2.85e-12	[23584095,24434261]	NO	NO
Cortical surface area	19	30301823	19:30301823:A:G	1.79e-08	[30050841,30554483]	YES	YES
Cortical surface area	19	30852938	19:30852938:C:CTACTG	7.73e-18	[30590250,31111683]	NO	NO
Cortical surface area	19	32207820	19:32207820:T:A	2.32e-83	[31901452,32469531]	NO	NO
Cortical surface area	19	37437106	19:37437106:T:C	4.19e-08	[37126830,37687106]	YES	YES
Cortical surface area	19	39167760	19:39167760:C:T	5.44e-10	[38888608,39499306]	NO	NO
Cortical surface area	19	45411941	19:45411941:C:T	2.39e-08	[45161941,45661941]	YES	NO
Cortical surface area	19	46118599	19:46118599:C:CA	1.55e-08	[45868127,46610520]	NO	NO
Cortical surface area	19	46359553	19:46359553:G:A	2.07e-12	[45868127,46610520]	NO	NO
Cortical surface area	19	47234885	19:47234885:A:G	4.55e-11	[46926752,48033482]	NO	NO
Cortical surface area	19	47459476	19:47459476:T:A	2.2e-12	[46926752,48033482]	NO	NO
Cortical surface area	19	47582356	19:47582356:G:A	2.09e-08	[46926752,48033482]	NO	NO
Cortical surface area	19	47770938	19:47770938:A:C	1.45e-09	[46926752,48033482]	NO	NO
Cortical surface area	19	50097932	19:50097932:C:G	6.81e-11	[49809718,50383696]	NO	NO
Cortical surface area	19	52182363	19:52182363:C:G	1.27e-17	[51901253,52444949]	NO	NO
Cortical surface area	1	969659	1:969659:A:G	5.07e-14	[671660,1272037]	YES	NO
Cortical surface area	1	1681665	1:1681665:T:C	8.87e-14	[1411844,3811920]	NO	NO
Cortical surface area	1	2020343	1:2020343:C:T	1.72e-16	[1411844,3811920]	NO	NO
Cortical surface area	1	2757401	1:2757401:AGTGT:A	1.54e-08	[1411844,3811920]	NO	NO
Cortical surface area	1	2791891	1:2791891:T:C	8.89e-28	[1411844,3811920]	NO	NO
Cortical surface area	1	2989543	1:2989543:G:T	4.16e-16	[1411844,3811920]	NO	NO
Cortical surface area	1	3038530	1:3038530:C:T	2.98e-18	[1411844,3811920]	NO	NO
Cortical surface area	1	3048742	1:3048742:G:A	2.39e-09	[1411844,3811920]	NO	NO
Cortical surface area	1	3132424	1:3132424:C:T	9.29e-12	[1411844,3811920]	NO	NO
Cortical surface area	1	3527291	1:3527291:A:G	1.02e-12	[1411844,3811920]	NO	NO
Cortical surface area	1	6907856	1:6907856:T:C	3.67e-08	[6656171,7157856]	YES	NO
Cortical surface area	1	7790548	1:7790548:T:C	3.72e-09	[7524775,8140956]	NO	NO
Cortical surface area	1	8738944	1:8738944:G:A	4.04e-15	[8162989,9145448]	NO	NO
Cortical surface area	1	9739435	1:9739435:C:T	6.16e-11	[9462099,10733779]	NO	NO
Cortical surface area	1	10290126	1:10290126:C:T	1.05e-16	[9462099,10733779]	NO	NO
Cortical surface area	1	11856378	1:11856378:A:G	1.25e-09	[11606378,12106378]	NO	NO
Cortical surface area	1	17315425	1:17315425:A:G	1.06e-29	[17025895,17660364]	NO	NO
Cortical surface area	1	18962095	1:18962095:T:C	5.28e-28	[18657484,19257083]	NO	NO
Cortical surface area	1	19717215	1:19717215:G:A	2.46e-08	[19463378,20225877]	NO	NO
Cortical surface area	1	19970727	1:19970727:G:C	3.45e-56	[19463378,20225877]	NO	NO
Cortical surface area	1	19970853	1:19970853:A:C	2.95e-08	[19463378,20225877]	NO	NO
Cortical surface area	1	22283735	1:22283735:T:C	3.54e-15	[21949245,22900546]	NO	NO
Cortical surface area	1	22432419	1:22432419:C:T	2.73e-20	[21949245,22900546]	NO	NO
Cortical surface area	1	22390577	1:22390577:C:T	2.03e-10	[21949245,22900546]	NO	NO
Cortical surface area	1	22645195	1:22645195:T:C	2.25e-19	[21949245,22900546]	NO	NO
Cortical surface area	1	22548819	1:22548819:C:T	6.58e-09	[21949245,22900546]	NO	NO
Cortical surface area	1	23429461	1:23429461:T:G	2.22e-13	[23024797,23987013]	NO	NO
Cortical surface area	1	23388032	1:23388032:A:G	3.05e-11	[23024797,23987013]	NO	NO
Cortical surface area	1	26613325	1:26613325:GA:G	9.55e-09	[26363325,27150805]	NO	NO
Cortical surface area	1	26783857	1:26783857:A:G	2.5e-15	[26363325,27150805]	NO	NO
Cortical surface area	1	26755919	1:26755919:G:A	1.34e-12	[26363325,27150805]	NO	NO
Cortical surface area	1	31317692	1:31317692:C:T	4.12e-09	[31067692,31570523]	YES	YES
Cortical surface area	1	33200287	1:33200287:T:C	3.22e-12	[32947772,33465380]	NO	NO
Cortical surface area	1	39792369	1:39792369:T:A	4.93e-19	[39301488,40337764]	NO	NO
Cortical surface area	1	39578808	1:39578808:T:C	9.61e-09	[39301488,40337764]	NO	NO
Cortical surface area	1	43409364	1:43409364:C:T	1.23e-08	[43159179,43674812]	YES	YES
Cortical surface area	1	43949718	1:43949718:C:T	2.85e-09	[43679988,44199718]	YES	NO
Cortical surface area	1	46240170	1:46240170:A:G	1.37e-27	[45600319,46883874]	NO	NO
Cortical surface area	1	46333358	1:46333358:A:G	9.77e-13	[45600319,46883874]	NO	NO
Cortical surface area	1	47980916	1:47980916:G:T	9.98e-142	[47395846,48251930]	NO	NO
Cortical surface area	1	47704240	1:47704240:G:A	6.9e-10	[47395846,48251930]	NO	NO
Cortical surface area	1	47990199	1:47990199:A:G	6.44e-12	[47395846,48251930]	NO	NO
Cortical surface area	1	47734457	1:47734457:T:A	6.8e-10	[47395846,48251930]	NO	NO
Cortical surface area	1	47942225	1:47942225:T:G	2.32e-10	[47395846,48251930]	NO	NO
Cortical surface area	1	47976869	1:47976869:T:C	3.68e-19	[47395846,48251930]	NO	NO
Cortical surface area	1	47953368	1:47953368:T:C	2.07e-13	[47395846,48251930]	NO	NO
Cortical surface area	1	49396989	1:49396989:C:G	1.99e-11	[49121194,52040316]	NO	NO
Cortical surface area	1	50917596	1:50917596:C:T	3.32e-22	[49121194,52040316]	NO	NO
Cortical surface area	1	51766490	1:51766490:A:G	2.91e-12	[49121194,52040316]	YES	NO
Cortical surface area	1	51114503	1:51114503:C:T	8.92e-15	[49121194,52040316]	NO	NO
Cortical surface area	1	50880176	1:50880176:T:C	8.68e-09	[49121194,52040316]	NO	NO
Cortical surface area	1	53734998	1:53734998:A:T	3.5e-17	[53406293,54002134]	YES	NO
Cortical surface area	1	54846586	1:54846586:G:A	1.36e-26	[54584528,55193264]	NO	NO
Cortical surface area	1	54899679	1:54899679:A:G	5.09e-14	[54584528,55193264]	NO	NO
Cortical surface area	1	56169575	1:56169575:T:C	7.85e-15	[55873166,56519811]	YES	NO
Cortical surface area	1	57012791	1:57012791:C:T	2.72e-09	[56694495,57269844]	NO	NO
Cortical surface area	1	58543436	1:58543436:T:C	4.91e-15	[58287361,58811329]	NO	NO
Cortical surface area	1	61302918	1:61302918:T:A	3.13e-08	[61052918,62089973]	NO	NO
Cortical surface area	1	61839973	1:61839973:C:T	2.39e-21	[61052918,62089973]	NO	NO
Cortical surface area	1	63106248	1:63106248:A:G	5.93e-14	[62650811,63449936]	NO	NO
Cortical surface area	1	64215591	1:64215591:ACT:A	2.74e-38	[63918755,65348309]	NO	NO
Cortical surface area	1	64234816	1:64234816:A:G	1.92e-08	[63918755,65348309]	NO	NO
Cortical surface area	1	64248228	1:64248228:T:G	3.54e-09	[63918755,65348309]	NO	NO
Cortical surface area	1	64643277	1:64643277:T:C	4.45e-27	[63918755,65348309]	NO	NO
Cortical surface area	1	65098309	1:65098309:A:G	1.4e-10	[63918755,65348309]	NO	NO
Cortical surface area	1	66996658	1:66996658:G:T	1.86e-08	[66745084,67246658]	YES	YES
Cortical surface area	1	67505206	1:67505206:A:G	4.87e-08	[67255206,67755206]	NO	NO
Cortical surface area	1	68595271	1:68595271:C:CTA	5.79e-43	[68319437,68944307]	NO	NO
Cortical surface area	1	68590604	1:68590604:G:T	6.42e-14	[68319437,68944307]	NO	NO
Cortical surface area	1	68688538	1:68688538:G:A	5.9e-10	[68319437,68944307]	NO	NO
Cortical surface area	1	82937433	1:82937433:T:G	2.8e-08	[82687433,83288818]	YES	NO
Cortical surface area	1	83030504	1:83030504:C:T	1.08e-10	[82687433,83288818]	YES	NO
Cortical surface area	1	85859265	1:85859265:C:T	6e-42	[85427159,86190249]	NO	NO
Cortical surface area	1	85761663	1:85761663:C:G	3.16e-08	[85427159,86190249]	NO	NO
Cortical surface area	1	85829405	1:85829405:G:A	5.72e-09	[85427159,86190249]	NO	NO
Cortical surface area	1	86653341	1:86653341:T:C	4.47e-29	[86323546,87047930]	NO	NO
Cortical surface area	1	87614707	1:87614707:C:A	1.35e-18	[87356624,88699559]	NO	NO
Cortical surface area	1	87873700	1:87873700:G:C	1.68e-21	[87356624,88699559]	NO	NO
Cortical surface area	1	88065407	1:88065407:T:C	1.08e-08	[87356624,88699559]	NO	NO
Cortical surface area	1	88216936	1:88216936:G:A	7.54e-22	[87356624,88699559]	NO	NO
Cortical surface area	1	88254265	1:88254265:G:A	1.68e-17	[87356624,88699559]	NO	NO
Cortical surface area	1	88271461	1:88271461:A:G	5.01e-22	[87356624,88699559]	NO	NO
Cortical surface area	1	88345904	1:88345904:T:C	3.7e-08	[87356624,88699559]	NO	NO
Cortical surface area	1	88423397	1:88423397:T:C	3.95e-29	[87356624,88699559]	NO	NO
Cortical surface area	1	90824652	1:90824652:T:C	3.9e-08	[90574563,91347495]	NO	NO
Cortical surface area	1	91088884	1:91088884:C:T	9.55e-17	[90574563,91347495]	NO	NO
Cortical surface area	1	93820684	1:93820684:G:A	5.28e-20	[93289212,94257922]	NO	NO
Cortical surface area	1	98398619	1:98398619:T:G	8.71e-09	[98148619,98648619]	YES	NO
Cortical surface area	1	101716688	1:101716688:T:C	2.65e-11	[101461964,101971205]	NO	NO
Cortical surface area	1	103351955	1:103351955:C:T	1.3e-18	[102960619,104006707]	NO	NO
Cortical surface area	1	103598591	1:103598591:T:A	5.66e-13	[102960619,104006707]	NO	NO
Cortical surface area	1	109728182	1:109728182:C:T	4.31e-08	[109478079,110887394]	NO	NO
Cortical surface area	1	110035159	1:110035159:C:T	1.34e-08	[109478079,110887394]	NO	NO
Cortical surface area	1	110604747	1:110604747:A:G	8.15e-16	[109478079,110887394]	YES	NO
Cortical surface area	1	113239478	1:113239478:C:T	1.66e-31	[112767515,113502614]	NO	NO
Cortical surface area	1	113041556	1:113041556:A:G	7.87e-11	[112767515,113502614]	NO	NO
Cortical surface area	1	113183848	1:113183848:T:A	5.95e-17	[112767515,113502614]	NO	NO
Cortical surface area	1	113070079	1:113070079:G:T	1.06e-16	[112767515,113502614]	NO	NO
Cortical surface area	1	119606217	1:119606217:C:T	9.31e-15	[118626293,120082202]	NO	NO
Cortical surface area	1	119762175	1:119762175:A:G	3.03e-42	[118626293,120082202]	NO	NO
Cortical surface area	1	119652601	1:119652601:T:C	2.8e-09	[118626293,120082202]	NO	NO
Cortical surface area	1	119569131	1:119569131:C:T	2.48e-15	[118626293,120082202]	NO	NO
Cortical surface area	1	119795854	1:119795854:C:T	8.9e-44	[118626293,120082202]	NO	NO
Cortical surface area	1	150510660	1:150510660:T:C	1.33e-13	[150000636,151366279]	YES	NO
Cortical surface area	1	151089602	1:151089602:T:A	1.12e-10	[150000636,151366279]	YES	YES
Cortical surface area	1	153821449	1:153821449:AC:A	7.7e-21	[153464252,154521686]	NO	NO
Cortical surface area	1	154020378	1:154020378:T:C	8.41e-22	[153464252,154521686]	NO	NO
Cortical surface area	1	153932270	1:153932270:T:C	2.92e-08	[153464252,154521686]	NO	NO
Cortical surface area	1	155046402	1:155046402:T:G	1.1e-13	[154757796,156413906]	NO	NO
Cortical surface area	1	155123837	1:155123837:C:G	1.87e-18	[154757796,156413906]	NO	NO
Cortical surface area	1	155042886	1:155042886:G:T	2.91e-13	[154757796,156413906]	NO	NO
Cortical surface area	1	155861980	1:155861980:G:A	5.02e-12	[154757796,156413906]	NO	NO
Cortical surface area	1	156163906	1:156163906:T:C	4.38e-08	[154757796,156413906]	NO	NO
Cortical surface area	1	156902259	1:156902259:A:G	6.85e-10	[156646164,157157081]	YES	YES
Cortical surface area	1	159903634	1:159903634:T:C	1.09e-20	[159640459,160683844]	NO	NO
Cortical surface area	1	160332081	1:160332081:T:A	1.3e-08	[159640459,160683844]	NO	NO
Cortical surface area	1	160404335	1:160404335:T:C	1.33e-13	[159640459,160683844]	NO	NO
Cortical surface area	1	160402782	1:160402782:T:C	6.73e-15	[159640459,160683844]	NO	NO
Cortical surface area	1	166957803	1:166957803:C:T	2.78e-23	[166561970,167209890]	NO	NO
Cortical surface area	1	167599533	1:167599533:T:C	1.69e-08	[167349533,167851020]	YES	NO
Cortical surface area	1	171455322	1:171455322:T:C	2.57e-11	[171170393,171766863]	YES	NO
Cortical surface area	1	175007697	1:175007697:G:T	1.92e-08	[174757697,175263936]	YES	YES
Cortical surface area	1	178872779	1:178872779:C:T	9.18e-19	[178483290,179747046]	NO	NO
Cortical surface area	1	179307218	1:179307218:A:G	5.49e-12	[178483290,179747046]	NO	NO
Cortical surface area	1	180513618	1:180513618:G:A	2.16e-09	[180000160,181316338]	NO	NO
Cortical surface area	1	180536954	1:180536954:G:A	3.26e-11	[180000160,181316338]	NO	NO
Cortical surface area	1	180568720	1:180568720:C:A	1.53e-08	[180000160,181316338]	NO	NO
Cortical surface area	1	180905694	1:180905694:T:C	1.18e-11	[180000160,181316338]	YES	NO
Cortical surface area	1	181058618	1:181058618:G:C	4.44e-09	[180000160,181316338]	YES	NO
Cortical surface area	1	182962521	1:182962521:A:C	2.44e-11	[182684454,184009410]	NO	NO
Cortical surface area	1	183176522	1:183176522:C:CT	1.37e-09	[182684454,184009410]	NO	NO
Cortical surface area	1	183101427	1:183101427:A:AAAT	3.86e-09	[182684454,184009410]	NO	NO
Cortical surface area	1	183759410	1:183759410:A:G	2.77e-09	[182684454,184009410]	YES	YES
Cortical surface area	1	197324983	1:197324983:C:T	2.76e-15	[197061971,198107845]	YES	NO
Cortical surface area	1	197596790	1:197596790:T:A	1.06e-18	[197061971,198107845]	YES	NO
Cortical surface area	1	198974825	1:198974825:T:C	1.13e-09	[198724825,199247832]	NO	NO
Cortical surface area	1	200670381	1:200670381:A:G	7.14e-09	[200419180,201231925]	NO	NO
Cortical surface area	1	200975064	1:200975064:A:G	5.66e-09	[200419180,201231925]	NO	NO
Cortical surface area	1	201620302	1:201620302:C:G	8.92e-10	[201368264,201870302]	YES	NO
Cortical surface area	1	204549375	1:204549375:G:A	2.48e-08	[204221042,206171352]	YES	YES
Cortical surface area	1	205056525	1:205056525:T:C	5.55e-17	[204221042,206171352]	NO	NO
Cortical surface area	1	205774897	1:205774897:T:C	9.3e-27	[204221042,206171352]	NO	NO
Cortical surface area	1	205657891	1:205657891:C:T	6.18e-10	[204221042,206171352]	NO	NO
Cortical surface area	1	206630721	1:206630721:A:G	2.43e-08	[206372887,206885570]	YES	YES
Cortical surface area	1	208430761	1:208430761:T:C	9.42e-17	[208164033,208774841]	NO	NO
Cortical surface area	1	208435564	1:208435564:C:T	1.58e-08	[208164033,208774841]	NO	NO
Cortical surface area	1	210502184	1:210502184:T:G	2.78e-14	[210231869,210830487]	NO	NO
Cortical surface area	1	210580381	1:210580381:C:T	3.37e-09	[210231869,210830487]	NO	NO
Cortical surface area	1	213796384	1:213796384:G:A	3.76e-08	[213546384,214046384]	YES	YES
Cortical surface area	1	215147374	1:215147374:A:G	2.64e-15	[214884722,215625386]	NO	NO
Cortical surface area	1	218907204	1:218907204:C:T	3.66e-08	[218657204,219157204]	YES	NO
Cortical surface area	1	219835486	1:219835486:T:C	8.06e-11	[219585486,221259507]	YES	YES
Cortical surface area	1	220446345	1:220446345:A:T	1.05e-10	[219585486,221259507]	NO	NO
Cortical surface area	1	220490812	1:220490812:A:G	5.96e-09	[219585486,221259507]	NO	NO
Cortical surface area	1	220839702	1:220839702:C:T	6.17e-09	[219585486,221259507]	NO	NO
Cortical surface area	1	220987469	1:220987469:G:C	2.59e-09	[219585486,221259507]	NO	NO
Cortical surface area	1	223932589	1:223932589:C:CA	1.73e-17	[223565851,224299363]	NO	NO
Cortical surface area	1	227439019	1:227439019:C:A	1.9e-14	[226970437,229171636]	NO	NO
Cortical surface area	1	228253830	1:228253830:C:G	4.25e-21	[226970437,229171636]	NO	NO
Cortical surface area	1	228335707	1:228335707:C:G	4.33e-10	[226970437,229171636]	NO	NO
Cortical surface area	1	228921636	1:228921636:T:C	3.93e-09	[226970437,229171636]	YES	YES
Cortical surface area	1	230237103	1:230237103:G:A	1.22e-08	[229986611,230505859]	YES	YES
Cortical surface area	1	234757757	1:234757757:C:T	2.33e-10	[234488338,235012074]	NO	NO
Cortical surface area	1	243666694	1:243666694:G:GCT	2.21e-13	[243380145,244484498]	NO	NO
Cortical surface area	1	244234498	1:244234498:A:G	3.35e-08	[243380145,244484498]	NO	NO
Cortical surface area	1	245581534	1:245581534:T:C	6.8e-10	[245325003,245832111]	YES	NO
Cortical surface area	20	3116192	20:3116192:C:T	3.57e-12	[2838010,3389383]	NO	NO
Cortical surface area	20	3786637	20:3786637:C:G	4.45e-08	[3536637,4036637]	NO	NO
Cortical surface area	20	6327199	20:6327199:T:C	4.81e-11	[6052290,7680639]	NO	NO
Cortical surface area	20	6489165	20:6489165:C:T	4.07e-17	[6052290,7680639]	NO	NO
Cortical surface area	20	7104588	20:7104588:A:G	3.47e-14	[6052290,7680639]	NO	NO
Cortical surface area	20	7343306	20:7343306:T:G	7.64e-11	[6052290,7680639]	NO	NO
Cortical surface area	20	7390182	20:7390182:AT:A	5.1e-10	[6052290,7680639]	NO	NO
Cortical surface area	20	10647679	20:10647679:G:A	1.44e-14	[10397679,10946266]	NO	NO
Cortical surface area	20	10657802	20:10657802:C:CTG	2.94e-10	[10397679,10946266]	NO	NO
Cortical surface area	20	11274242	20:11274242:C:T	1.26e-10	[11012568,11606147]	YES	NO
Cortical surface area	20	14294196	20:14294196:C:T	1.84e-13	[13954184,14602261]	NO	NO
Cortical surface area	20	15619166	20:15619166:G:A	2.07e-17	[15365228,16051600]	NO	NO
Cortical surface area	20	15781434	20:15781434:C:T	7.01e-18	[15365228,16051600]	NO	NO
Cortical surface area	20	16978093	20:16978093:G:A	3e-18	[16714237,17290353]	NO	NO
Cortical surface area	20	21958049	20:21958049:A:G	6.58e-21	[21508674,22381194]	YES	NO
Cortical surface area	20	22696555	20:22696555:GA:G	7.28e-11	[22437855,22985819]	YES	YES
Cortical surface area	20	31163914	20:31163914:G:C	2.6e-08	[30843514,31745977]	NO	NO
Cortical surface area	20	31344512	20:31344512:G:A	8.83e-30	[30843514,31745977]	NO	NO
Cortical surface area	20	33082881	20:33082881:A:T	2.02e-11	[32264092,34440870]	NO	NO
Cortical surface area	20	34025756	20:34025756:G:A	2.98e-19	[32264092,34440870]	YES	NO
Cortical surface area	20	36838422	20:36838422:C:T	2.68e-41	[36558578,37136397]	NO	NO
Cortical surface area	20	38115813	20:38115813:A:G	5.71e-10	[37692991,38406052]	YES	YES
Cortical surface area	20	39240870	20:39240870:A:G	8.53e-09	[38989344,40512422]	NO	NO
Cortical surface area	20	39832628	20:39832628:C:T	7.29e-19	[38989344,40512422]	NO	NO
Cortical surface area	20	45523639	20:45523639:C:A	2.79e-08	[45273639,45773639]	NO	NO
Cortical surface area	20	46360465	20:46360465:T:C	1.03e-14	[46106466,46625446]	YES	NO
Cortical surface area	20	47697253	20:47697253:A:T	6.45e-09	[47204542,47947524]	YES	YES
Cortical surface area	20	48248326	20:48248326:C:T	3.8e-11	[47992799,48585519]	YES	NO
Cortical surface area	20	49194444	20:49194444:T:C	1.28e-12	[48820644,49477500]	NO	NO
Cortical surface area	20	49160452	20:49160452:A:G	4.79e-09	[48820644,49477500]	NO	NO
Cortical surface area	20	50826990	20:50826990:C:G	9.9e-09	[50570509,51076990]	NO	NO
Cortical surface area	20	52452991	20:52452991:G:A	5.23e-75	[52161504,52722087]	NO	NO
Cortical surface area	20	52416095	20:52416095:A:G	4.21e-08	[52161504,52722087]	NO	NO
Cortical surface area	20	55532545	20:55532545:G:GA	3.44e-18	[55259980,55783146]	YES	NO
Cortical surface area	20	60811521	20:60811521:A:G	1.9e-08	[60561521,61061521]	NO	NO
Cortical surface area	21	34163742	21:34163742:G:A	3.24e-14	[33905083,34749426]	NO	NO
Cortical surface area	21	34284361	21:34284361:A:C	1.64e-19	[33905083,34749426]	NO	NO
Cortical surface area	21	34343695	21:34343695:C:A	1.6e-13	[33905083,34749426]	NO	NO
Cortical surface area	21	34412038	21:34412038:G:A	5.24e-09	[33905083,34749426]	NO	NO
Cortical surface area	21	34465070	21:34465070:TC:T	3.63e-12	[33905083,34749426]	NO	NO
Cortical surface area	21	39897553	21:39897553:T:C	1.02e-11	[39631848,40152512]	NO	NO
Cortical surface area	21	40667040	21:40667040:T:C	3.31e-08	[40409587,40930170]	YES	YES
Cortical surface area	21	46830393	21:46830393:C:G	7.39e-17	[46575723,47089375]	NO	NO
Cortical surface area	22	19304590	22:19304590:C:T	2.78e-09	[19054590,19676166]	YES	YES
Cortical surface area	22	20775034	22:20775034:TGTA:T	1.5e-12	[20508954,21040723]	YES	NO
Cortical surface area	22	21945978	22:21945978:A:G	4.15e-11	[21666166,22247591]	NO	NO
Cortical surface area	22	23654807	22:23654807:A:C	1.03e-08	[23399461,23941564]	YES	NO
Cortical surface area	22	23691564	22:23691564:A:G	1.8e-08	[23399461,23941564]	YES	NO
Cortical surface area	22	24612115	22:24612115:T:C	3.08e-11	[24157334,24868856]	NO	NO
Cortical surface area	22	28856429	22:28856429:AT:A	1.63e-11	[28066227,29807292]	NO	NO
Cortical surface area	22	29099754	22:29099754:C:T	9.19e-10	[28066227,29807292]	NO	NO
Cortical surface area	22	29451671	22:29451671:G:A	8.92e-14	[28066227,29807292]	NO	NO
Cortical surface area	22	29458441	22:29458441:G:A	3.6e-14	[28066227,29807292]	NO	NO
Cortical surface area	22	37959214	22:37959214:C:T	1.6e-08	[37687829,38466758]	NO	NO
Cortical surface area	22	38134166	22:38134166:A:G	1.18e-12	[37687829,38466758]	NO	NO
Cortical surface area	22	40720704	22:40720704:G:A	1.48e-13	[40294337,41060231]	NO	NO
Cortical surface area	22	42025823	22:42025823:A:G	5.54e-11	[41775823,42829309]	NO	NO
Cortical surface area	22	42184143	22:42184143:T:C	1.01e-14	[41775823,42829309]	NO	NO
Cortical surface area	22	42538618	22:42538618:G:A	1.66e-09	[41775823,42829309]	NO	NO
Cortical surface area	22	43621533	22:43621533:A:G	7.74e-18	[43362426,44422642]	NO	NO
Cortical surface area	22	43740770	22:43740770:C:T	1.83e-15	[43362426,44422642]	NO	NO
Cortical surface area	22	43788830	22:43788830:G:C	8.52e-27	[43362426,44422642]	NO	NO
Cortical surface area	22	43746855	22:43746855:T:C	4.73e-11	[43362426,44422642]	NO	NO
Cortical surface area	22	43910839	22:43910839:A:G	8.23e-09	[43362426,44422642]	NO	NO
Cortical surface area	22	43959182	22:43959182:G:A	1.05e-24	[43362426,44422642]	NO	NO
Cortical surface area	22	45784798	22:45784798:C:T	2.67e-10	[45456777,47452691]	YES	NO
Cortical surface area	22	45996298	22:45996298:G:A	3.56e-10	[45456777,47452691]	NO	NO
Cortical surface area	22	46246890	22:46246890:G:A	1.28e-14	[45456777,47452691]	NO	NO
Cortical surface area	22	46440605	22:46440605:C:T	2.3e-11	[45456777,47452691]	NO	NO
Cortical surface area	22	46760481	22:46760481:G:C	5.04e-17	[45456777,47452691]	NO	NO
Cortical surface area	22	46854935	22:46854935:T:G	7.26e-15	[45456777,47452691]	NO	NO
Cortical surface area	22	47196524	22:47196524:G:A	2.91e-09	[45456777,47452691]	NO	NO
Cortical surface area	22	50303088	22:50303088:A:G	3.29e-11	[49873291,51134075]	NO	NO
Cortical surface area	22	50547712	22:50547712:G:A	4.18e-08	[49873291,51134075]	NO	NO
Cortical surface area	22	50672154	22:50672154:A:G	2.98e-10	[49873291,51134075]	NO	NO
Cortical surface area	22	50722408	22:50722408:C:T	5.81e-14	[49873291,51134075]	NO	NO
Cortical surface area	22	50722167	22:50722167:C:T	2.53e-08	[49873291,51134075]	NO	NO
Cortical surface area	22	50881796	22:50881796:G:C	5.1e-11	[49873291,51134075]	YES	NO
Cortical surface area	2	2296426	2:2296426:G:A	1.64e-08	[2046426,2565801]	YES	YES
Cortical surface area	2	3403708	2:3403708:G:A	1.39e-15	[3142075,3701704]	NO	NO
Cortical surface area	2	4536824	2:4536824:T:C	3.43e-23	[4245939,4847221]	NO	NO
Cortical surface area	2	4562203	2:4562203:T:TACC	9.23e-54	[4245939,4847221]	NO	NO
Cortical surface area	2	4597221	2:4597221:T:C	1.06e-08	[4245939,4847221]	NO	NO
Cortical surface area	2	5152760	2:5152760:C:T	5.17e-13	[4887525,5447321]	NO	NO
Cortical surface area	2	5832667	2:5832667:C:T	2.29e-17	[5552363,6890911]	NO	NO
Cortical surface area	2	5830538	2:5830538:C:G	2.04e-14	[5552363,6890911]	NO	NO
Cortical surface area	2	5835047	2:5835047:C:T	1.68e-08	[5552363,6890911]	NO	NO
Cortical surface area	2	5870941	2:5870941:T:C	7.1e-10	[5552363,6890911]	NO	NO
Cortical surface area	2	6152133	2:6152133:A:G	7.22e-09	[5552363,6890911]	NO	NO
Cortical surface area	2	6566657	2:6566657:C:T	2.89e-10	[5552363,6890911]	NO	NO
Cortical surface area	2	6600317	2:6600317:G:A	5.5e-12	[5552363,6890911]	NO	NO
Cortical surface area	2	11411904	2:11411904:G:A	1.17e-14	[11050732,11779510]	YES	NO
Cortical surface area	2	11494202	2:11494202:G:C	6.6e-12	[11050732,11779510]	YES	NO
Cortical surface area	2	11529510	2:11529510:A:G	4.64e-11	[11050732,11779510]	YES	NO
Cortical surface area	2	16386265	2:16386265:A:T	2.08e-22	[16136265,16912933]	NO	NO
Cortical surface area	2	16387945	2:16387945:G:A	6.57e-09	[16136265,16912933]	NO	NO
Cortical surface area	2	16430349	2:16430349:C:T	9.9e-26	[16136265,16912933]	NO	NO
Cortical surface area	2	16630892	2:16630892:G:A	1.18e-10	[16136265,16912933]	NO	NO
Cortical surface area	2	18701627	2:18701627:C:T	3.88e-40	[18422346,19799473]	NO	NO
Cortical surface area	2	18988373	2:18988373:T:C	4.7e-10	[18422346,19799473]	NO	NO
Cortical surface area	2	19007160	2:19007160:T:C	2.64e-08	[18422346,19799473]	NO	NO
Cortical surface area	2	19368078	2:19368078:A:G	7.32e-10	[18422346,19799473]	NO	NO
Cortical surface area	2	19530259	2:19530259:G:C	2.5e-14	[18422346,19799473]	NO	NO
Cortical surface area	2	23910155	2:23910155:T:G	1.76e-11	[23646049,24840800]	NO	NO
Cortical surface area	2	24049453	2:24049453:A:G	2.95e-11	[23646049,24840800]	NO	NO
Cortical surface area	2	27173249	2:27173249:A:G	9.96e-24	[26711166,27620970]	NO	NO
Cortical surface area	2	32603805	2:32603805:A:G	4.8e-16	[32249150,33572077]	NO	NO
Cortical surface area	2	33060719	2:33060719:C:T	9.42e-23	[32249150,33572077]	NO	NO
Cortical surface area	2	33262241	2:33262241:TA:T	1.81e-10	[32249150,33572077]	NO	NO
Cortical surface area	2	36613556	2:36613556:G:T	6.06e-14	[36328013,38153370]	NO	NO
Cortical surface area	2	36656951	2:36656951:A:G	5.84e-13	[36328013,38153370]	NO	NO
Cortical surface area	2	36773512	2:36773512:A:G	5.04e-09	[36328013,38153370]	NO	NO
Cortical surface area	2	37154981	2:37154981:C:T	1.73e-11	[36328013,38153370]	NO	NO
Cortical surface area	2	37141336	2:37141336:G:A	5.4e-109	[36328013,38153370]	NO	NO
Cortical surface area	2	37076594	2:37076594:C:T	5.46e-20	[36328013,38153370]	NO	NO
Cortical surface area	2	37083052	2:37083052:G:T	4.58e-09	[36328013,38153370]	NO	NO
Cortical surface area	2	37252442	2:37252442:A:C	1.18e-08	[36328013,38153370]	NO	NO
Cortical surface area	2	37223346	2:37223346:A:G	6.04e-10	[36328013,38153370]	NO	NO
Cortical surface area	2	37256839	2:37256839:G:A	8.28e-12	[36328013,38153370]	NO	NO
Cortical surface area	2	37414431	2:37414431:C:A	6.2e-12	[36328013,38153370]	NO	NO
Cortical surface area	2	37695748	2:37695748:C:T	4e-17	[36328013,38153370]	NO	NO
Cortical surface area	2	37899310	2:37899310:G:A	2.03e-29	[36328013,38153370]	NO	NO
Cortical surface area	2	37855222	2:37855222:C:T	2.02e-13	[36328013,38153370]	NO	NO
Cortical surface area	2	37875726	2:37875726:T:G	1.22e-09	[36328013,38153370]	NO	NO
Cortical surface area	2	42181679	2:42181679:T:A	7.68e-21	[41881864,44092712]	NO	NO
Cortical surface area	2	42284110	2:42284110:T:A	1.24e-16	[41881864,44092712]	NO	NO
Cortical surface area	2	42282829	2:42282829:A:C	5.22e-37	[41881864,44092712]	NO	NO
Cortical surface area	2	42510018	2:42510018:G:A	1.5e-14	[41881864,44092712]	NO	NO
Cortical surface area	2	43549684	2:43549684:GA:G	2.9e-14	[41881864,44092712]	NO	NO
Cortical surface area	2	43544117	2:43544117:T:C	1.82e-13	[41881864,44092712]	NO	NO
Cortical surface area	2	45154229	2:45154229:G:A	1.53e-20	[44862453,45783241]	NO	NO
Cortical surface area	2	45406704	2:45406704:G:C	1.44e-08	[44862453,45783241]	NO	NO
Cortical surface area	2	45532756	2:45532756:A:G	1.64e-08	[44862453,45783241]	NO	NO
Cortical surface area	2	46790997	2:46790997:T:G	9.72e-10	[46527646,47095849]	YES	YES
Cortical surface area	2	48277490	2:48277490:A:G	8.6e-54	[47763238,49005477]	NO	NO
Cortical surface area	2	48013858	2:48013858:CT:C	4.45e-08	[47763238,49005477]	NO	NO
Cortical surface area	2	48328813	2:48328813:C:G	7.92e-13	[47763238,49005477]	NO	NO
Cortical surface area	2	48690596	2:48690596:G:T	3.26e-09	[47763238,49005477]	NO	NO
Cortical surface area	2	49371129	2:49371129:G:T	1.04e-10	[49114434,49772898]	NO	NO
Cortical surface area	2	54615325	2:54615325:T:C	2.7e-50	[54179834,56198833]	NO	NO
Cortical surface area	2	54615464	2:54615464:A:G	6.23e-16	[54179834,56198833]	NO	NO
Cortical surface area	2	54615526	2:54615526:G:A	2.92e-11	[54179834,56198833]	NO	NO
Cortical surface area	2	54684666	2:54684666:G:C	1.35e-14	[54179834,56198833]	NO	NO
Cortical surface area	2	54817683	2:54817683:G:A	3.03e-15	[54179834,56198833]	NO	NO
Cortical surface area	2	54898932	2:54898932:G:A	2.29e-10	[54179834,56198833]	NO	NO
Cortical surface area	2	54888200	2:54888200:C:A	5.23e-09	[54179834,56198833]	NO	NO
Cortical surface area	2	55383427	2:55383427:A:T	9.01e-11	[54179834,56198833]	NO	NO
Cortical surface area	2	55594944	2:55594944:T:G	8.26e-10	[54179834,56198833]	NO	NO
Cortical surface area	2	55738099	2:55738099:A:C	3.79e-09	[54179834,56198833]	NO	NO
Cortical surface area	2	55670358	2:55670358:C:T	1.84e-10	[54179834,56198833]	NO	NO
Cortical surface area	2	58154249	2:58154249:C:T	2.56e-27	[57692325,58987818]	NO	NO
Cortical surface area	2	58476130	2:58476130:C:T	1.99e-11	[57692325,58987818]	NO	NO
Cortical surface area	2	58619819	2:58619819:C:A	2.7e-10	[57692325,58987818]	NO	NO
Cortical surface area	2	60218519	2:60218519:T:A	4.7e-17	[59864796,62086773]	NO	NO
Cortical surface area	2	60133158	2:60133158:T:G	1.04e-14	[59864796,62086773]	NO	NO
Cortical surface area	2	60501216	2:60501216:G:A	6.34e-27	[59864796,62086773]	NO	NO
Cortical surface area	2	60561821	2:60561821:A:G	3.53e-08	[59864796,62086773]	NO	NO
Cortical surface area	2	60649143	2:60649143:A:G	1.32e-27	[59864796,62086773]	NO	NO
Cortical surface area	2	60600421	2:60600421:T:C	7.08e-09	[59864796,62086773]	NO	NO
Cortical surface area	2	60592356	2:60592356:T:C	1.22e-10	[59864796,62086773]	NO	NO
Cortical surface area	2	60715179	2:60715179:T:C	5.49e-12	[59864796,62086773]	NO	NO
Cortical surface area	2	60764311	2:60764311:T:TTAACA	1.2e-11	[59864796,62086773]	NO	NO
Cortical surface area	2	61482261	2:61482261:A:G	1.66e-18	[59864796,62086773]	NO	NO
Cortical surface area	2	65964550	2:65964550:G:A	1.26e-61	[65687041,66355510]	NO	NO
Cortical surface area	2	66097500	2:66097500:T:G	2.58e-11	[65687041,66355510]	NO	NO
Cortical surface area	2	66752556	2:66752556:G:C	9.41e-11	[66495450,67029866]	YES	NO
Cortical surface area	2	70551844	2:70551844:C:CA	2.77e-08	[70292612,70807317]	YES	YES
Cortical surface area	2	71786153	2:71786153:C:T	9.26e-13	[71529756,72108565]	NO	NO
Cortical surface area	2	71858565	2:71858565:T:C	3.78e-08	[71529756,72108565]	NO	NO
Cortical surface area	2	72978326	2:72978326:G:C	6.93e-13	[72273949,73418354]	NO	NO
Cortical surface area	2	73164549	2:73164549:G:A	2.37e-09	[72273949,73418354]	YES	NO
Cortical surface area	2	85531116	2:85531116:T:C	3.48e-17	[85281116,85908232]	NO	NO
Cortical surface area	2	85572223	2:85572223:T:A	9.61e-13	[85281116,85908232]	NO	NO
Cortical surface area	2	96774786	2:96774786:G:T	2.43e-09	[96430567,98873406]	NO	NO
Cortical surface area	2	98263327	2:98263327:AT:A	2.49e-18	[96430567,98873406]	NO	NO
Cortical surface area	2	98374512	2:98374512:G:A	1.19e-09	[96430567,98873406]	NO	NO
Cortical surface area	2	99932255	2:99932255:T:C	2.06e-08	[99682255,100182255]	YES	YES
Cortical surface area	2	100735567	2:100735567:G:A	1.43e-08	[100352659,100990430]	NO	NO
Cortical surface area	2	102429516	2:102429516:G:A	4.32e-11	[102047387,102694956]	YES	NO
Cortical surface area	2	104489351	2:104489351:T:C	1.74e-10	[103840213,105055521]	NO	NO
Cortical surface area	2	104724493	2:104724493:A:G	5.17e-16	[103840213,105055521]	NO	NO
Cortical surface area	2	105328666	2:105328666:T:C	2.03e-08	[105078666,105852533]	NO	NO
Cortical surface area	2	105481492	2:105481492:G:A	1.76e-25	[105078666,105852533]	NO	NO
Cortical surface area	2	105451046	2:105451046:G:A	3.6e-10	[105078666,105852533]	NO	NO
Cortical surface area	2	109935792	2:109935792:C:T	2.47e-17	[109671632,110215624]	YES	NO
Cortical surface area	2	112943872	2:112943872:G:A	5.72e-10	[112693070,113490183]	NO	NO
Cortical surface area	2	119015377	2:119015377:A:G	6.1e-12	[118724394,119786710]	NO	NO
Cortical surface area	2	119043036	2:119043036:A:G	2.83e-27	[118724394,119786710]	NO	NO
Cortical surface area	2	119410650	2:119410650:CT:C	5.46e-14	[118724394,119786710]	NO	NO
Cortical surface area	2	119329438	2:119329438:C:A	6.8e-11	[118724394,119786710]	NO	NO
Cortical surface area	2	119534029	2:119534029:T:C	9.83e-12	[118724394,119786710]	NO	NO
Cortical surface area	2	121200270	2:121200270:G:A	1.53e-08	[120949355,121600667]	NO	NO
Cortical surface area	2	121345463	2:121345463:G:T	9.5e-10	[120949355,121600667]	NO	NO
Cortical surface area	2	134256134	2:134256134:A:G	2.32e-11	[133982622,134739079]	NO	NO
Cortical surface area	2	134358313	2:134358313:C:T	6.69e-09	[133982622,134739079]	NO	NO
Cortical surface area	2	134489079	2:134489079:CA:C	2.12e-08	[133982622,134739079]	NO	NO
Cortical surface area	2	143810757	2:143810757:C:G	4.13e-08	[143560757,144433008]	YES	NO
Cortical surface area	2	144183002	2:144183002:A:G	1.44e-08	[143560757,144433008]	YES	NO
Cortical surface area	2	145222171	2:145222171:G:A	1.59e-08	[144972171,146122366]	YES	YES
Cortical surface area	2	145759721	2:145759721:A:G	4.61e-20	[144972171,146122366]	NO	NO
Cortical surface area	2	148548683	2:148548683:G:C	6.89e-13	[148207312,149053672]	YES	NO
Cortical surface area	2	149999124	2:149999124:C:T	3.57e-38	[149689778,150334915]	NO	NO
Cortical surface area	2	150020578	2:150020578:G:C	9.91e-11	[149689778,150334915]	NO	NO
Cortical surface area	2	150961555	2:150961555:C:T	1.93e-16	[150698178,151901890]	NO	NO
Cortical surface area	2	151345113	2:151345113:A:G	4.59e-14	[150698178,151901890]	NO	NO
Cortical surface area	2	151651890	2:151651890:CA:C	1.23e-09	[150698178,151901890]	NO	NO
Cortical surface area	2	153190223	2:153190223:G:A	4.74e-09	[152920673,153446112]	YES	NO
Cortical surface area	2	161901650	2:161901650:G:A	1.39e-09	[161628906,163160403]	NO	NO
Cortical surface area	2	162201065	2:162201065:A:G	1.81e-10	[161628906,163160403]	NO	NO
Cortical surface area	2	162779958	2:162779958:C:T	3.57e-12	[161628906,163160403]	NO	NO
Cortical surface area	2	162901327	2:162901327:T:C	5.88e-47	[161628906,163160403]	NO	NO
Cortical surface area	2	174754122	2:174754122:A:AG	3.56e-08	[174504122,175004122]	YES	YES
Cortical surface area	2	183698599	2:183698599:C:T	1.23e-11	[183441020,184164247]	NO	NO
Cortical surface area	2	183703336	2:183703336:A:G	5.78e-13	[183441020,184164247]	NO	NO
Cortical surface area	2	187620297	2:187620297:T:A	9.16e-13	[187248107,188775871]	NO	NO
Cortical surface area	2	188273829	2:188273829:T:C	3.65e-67	[187248107,188775871]	NO	NO
Cortical surface area	2	188175775	2:188175775:T:A	1.65e-08	[187248107,188775871]	NO	NO
Cortical surface area	2	188525871	2:188525871:C:A	2.92e-08	[187248107,188775871]	NO	NO
Cortical surface area	2	189911251	2:189911251:A:G	5.71e-20	[189632901,190610239]	NO	NO
Cortical surface area	2	189891639	2:189891639:G:A	1.05e-08	[189632901,190610239]	NO	NO
Cortical surface area	2	197056378	2:197056378:C:T	3.74e-14	[196263007,197315889]	NO	NO
Cortical surface area	2	198390009	2:198390009:T:C	2.17e-19	[197894539,199833345]	NO	NO
Cortical surface area	2	198166197	2:198166197:A:T	1.02e-10	[197894539,199833345]	NO	NO
Cortical surface area	2	199236870	2:199236870:A:C	2.57e-09	[197894539,199833345]	NO	NO
Cortical surface area	2	199557971	2:199557971:T:C	1.12e-10	[197894539,199833345]	NO	NO
Cortical surface area	2	200449911	2:200449911:A:G	7.01e-12	[200137421,201151427]	NO	NO
Cortical surface area	2	200561005	2:200561005:C:T	5.69e-11	[200137421,201151427]	NO	NO
Cortical surface area	2	200803023	2:200803023:G:A	2.3e-08	[200137421,201151427]	NO	NO
Cortical surface area	2	202800101	2:202800101:C:T	4.29e-15	[202537367,204622982]	NO	NO
Cortical surface area	2	202916398	2:202916398:G:T	8.97e-09	[202537367,204622982]	NO	NO
Cortical surface area	2	203676105	2:203676105:T:C	2.83e-19	[202537367,204622982]	NO	NO
Cortical surface area	2	203523042	2:203523042:G:A	3.32e-10	[202537367,204622982]	YES	NO
Cortical surface area	2	204298277	2:204298277:T:C	1.91e-12	[202537367,204622982]	NO	NO
Cortical surface area	2	206022201	2:206022201:A:C	6.44e-11	[205705471,206661325]	NO	NO
Cortical surface area	2	206411325	2:206411325:G:C	1.98e-08	[205705471,206661325]	NO	NO
Cortical surface area	2	208340250	2:208340250:C:T	5.66e-10	[208080457,209032618]	NO	NO
Cortical surface area	2	208687815	2:208687815:G:GCTTCATTCAAAGTCTGGAA	2.64e-13	[208080457,209032618]	YES	NO
Cortical surface area	2	208773860	2:208773860:T:C	7.94e-14	[208080457,209032618]	YES	NO
Cortical surface area	2	217427625	2:217427625:G:C	2.88e-21	[216996279,218933154]	NO	NO
Cortical surface area	2	217375851	2:217375851:T:C	7.28e-09	[216996279,218933154]	NO	NO
Cortical surface area	2	217500819	2:217500819:G:A	7.81e-12	[216996279,218933154]	NO	NO
Cortical surface area	2	217927499	2:217927499:A:G	7.89e-10	[216996279,218933154]	NO	NO
Cortical surface area	2	218315342	2:218315342:T:G	1.03e-08	[216996279,218933154]	NO	NO
Cortical surface area	2	218683154	2:218683154:G:A	4.7e-09	[216996279,218933154]	NO	NO
Cortical surface area	2	219279588	2:219279588:A:G	3.69e-10	[219024142,219818998]	YES	YES
Cortical surface area	2	221201852	2:221201852:G:A	4.52e-13	[220783386,221789821]	NO	NO
Cortical surface area	2	221478704	2:221478704:T:TACA	7.53e-13	[220783386,221789821]	NO	NO
Cortical surface area	2	222087846	2:222087846:C:G	3.47e-08	[221837846,222631228]	NO	NO
Cortical surface area	2	222302000	2:222302000:A:G	8.93e-17	[221837846,222631228]	NO	NO
Cortical surface area	2	223092217	2:223092217:A:G	8.73e-24	[222736828,223358422]	NO	NO
Cortical surface area	2	225189865	2:225189865:G:A	3.66e-11	[224937239,226479099]	YES	NO
Cortical surface area	2	225334070	2:225334070:G:A	4.67e-10	[224937239,226479099]	YES	NO
Cortical surface area	2	225904971	2:225904971:G:A	1.07e-10	[224937239,226479099]	NO	NO
Cortical surface area	2	226224786	2:226224786:A:T	3.23e-16	[224937239,226479099]	NO	NO
Cortical surface area	2	227172598	2:227172598:T:C	5.43e-16	[226674209,227432726]	NO	NO
Cortical surface area	2	235352188	2:235352188:G:T	3.63e-10	[235101851,235653633]	YES	NO
Cortical surface area	2	235402279	2:235402279:C:T	1.34e-09	[235101851,235653633]	YES	NO
Cortical surface area	2	236722996	2:236722996:G:A	3.9e-17	[236381009,236981624]	NO	NO
Cortical surface area	2	237494444	2:237494444:T:C	4.39e-10	[237236712,238002442]	NO	NO
Cortical surface area	2	237585368	2:237585368:C:T	4.26e-17	[237236712,238002442]	NO	NO
Cortical surface area	2	237713907	2:237713907:C:A	6.62e-20	[237236712,238002442]	NO	NO
Cortical surface area	2	242414091	2:242414091:T:C	5.41e-11	[241934638,242716277]	NO	NO
Cortical surface area	2	242257859	2:242257859:A:G	7.73e-09	[241934638,242716277]	NO	NO
Cortical surface area	3	250758	3:250758:G:A	3.44e-11	[-104277,502344]	YES	YES
Cortical surface area	3	4748862	3:4748862:A:G	2.37e-09	[4478574,5001160]	YES	YES
Cortical surface area	3	17528764	3:17528764:A:T	2.34e-17	[16970098,18137988]	NO	NO
Cortical surface area	3	17301192	3:17301192:C:T	3.73e-09	[16970098,18137988]	NO	NO
Cortical surface area	3	28040643	3:28040643:T:G	4.92e-14	[27757315,28290643]	NO	NO
Cortical surface area	3	28007738	3:28007738:T:C	3.33e-11	[27757315,28290643]	NO	NO
Cortical surface area	3	32939573	3:32939573:C:G	1.96e-13	[32673640,33260765]	NO	NO
Cortical surface area	3	37269039	3:37269039:C:T	1.02e-14	[36714216,37846805]	NO	NO
Cortical surface area	3	37535191	3:37535191:G:A	1.81e-12	[36714216,37846805]	NO	NO
Cortical surface area	3	37558775	3:37558775:C:T	2.33e-08	[36714216,37846805]	NO	NO
Cortical surface area	3	39195462	3:39195462:T:G	2.33e-09	[38938351,39461380]	NO	NO
Cortical surface area	3	41289031	3:41289031:C:T	1.01e-08	[41024477,41555087]	NO	NO
Cortical surface area	3	43383641	3:43383641:G:A	2.74e-09	[43100438,43633641]	NO	NO
Cortical surface area	3	45701455	3:45701455:C:T	1.57e-14	[45182423,46064094]	NO	NO
Cortical surface area	3	45750200	3:45750200:T:C	2.68e-08	[45182423,46064094]	NO	NO
Cortical surface area	3	47517774	3:47517774:T:A	4.81e-14	[46732737,53425017]	YES	YES
Cortical surface area	3	46986452	3:46986452:T:C	4.77e-09	[46732737,53425017]	YES	YES
Cortical surface area	3	50011101	3:50011101:G:C	2.91e-14	[46732737,53425017]	NO	NO
Cortical surface area	3	48857805	3:48857805:C:T	9.08e-33	[46732737,53425017]	NO	NO
Cortical surface area	3	48416756	3:48416756:G:A	1.48e-11	[46732737,53425017]	NO	NO
Cortical surface area	3	49900350	3:49900350:A:G	2.47e-18	[46732737,53425017]	NO	NO
Cortical surface area	3	50041313	3:50041313:T:C	3.96e-21	[46732737,53425017]	NO	NO
Cortical surface area	3	49575831	3:49575831:T:C	1.85e-10	[46732737,53425017]	NO	NO
Cortical surface area	3	50513157	3:50513157:G:A	2.5e-08	[46732737,53425017]	NO	NO
Cortical surface area	3	50742463	3:50742463:AT:A	9.4e-09	[46732737,53425017]	NO	NO
Cortical surface area	3	51286778	3:51286778:A:G	1.28e-08	[46732737,53425017]	YES	NO
Cortical surface area	3	52305633	3:52305633:T:C	5.16e-26	[46732737,53425017]	NO	NO
Cortical surface area	3	52848207	3:52848207:T:C	1.6e-10	[46732737,53425017]	NO	NO
Cortical surface area	3	52814255	3:52814255:A:T	3.84e-09	[46732737,53425017]	NO	NO
Cortical surface area	3	55214481	3:55214481:C:T	1.39e-09	[54946913,56678880]	NO	NO
Cortical surface area	3	55356965	3:55356965:T:G	8.94e-16	[54946913,56678880]	NO	NO
Cortical surface area	3	55550689	3:55550689:C:T	1.5e-14	[54946913,56678880]	NO	NO
Cortical surface area	3	55567452	3:55567452:G:A	3.26e-10	[54946913,56678880]	NO	NO
Cortical surface area	3	56070758	3:56070758:C:A	5.04e-18	[54946913,56678880]	NO	NO
Cortical surface area	3	56155233	3:56155233:G:A	1.91e-14	[54946913,56678880]	NO	NO
Cortical surface area	3	57186580	3:57186580:C:A	5.46e-27	[56878211,57496354]	NO	NO
Cortical surface area	3	57938822	3:57938822:A:G	2.8e-08	[57688822,58188822]	NO	NO
Cortical surface area	3	58462632	3:58462632:C:G	3.39e-08	[58212632,58712632]	YES	YES
Cortical surface area	3	62428323	3:62428323:T:C	1.12e-09	[62169273,62834060]	NO	NO
Cortical surface area	3	62560523	3:62560523:C:T	1.53e-16	[62169273,62834060]	NO	NO
Cortical surface area	3	64446112	3:64446112:G:A	5.19e-09	[64144359,65263180]	NO	NO
Cortical surface area	3	64597347	3:64597347:C:T	2.34e-29	[64144359,65263180]	NO	NO
Cortical surface area	3	64653448	3:64653448:C:T	2.5e-10	[64144359,65263180]	NO	NO
Cortical surface area	3	64878444	3:64878444:A:C	2.72e-22	[64144359,65263180]	NO	NO
Cortical surface area	3	64989767	3:64989767:G:A	3.67e-14	[64144359,65263180]	NO	NO
Cortical surface area	3	65754783	3:65754783:G:T	2e-09	[65504783,66694697]	NO	NO
Cortical surface area	3	66042247	3:66042247:C:T	9.19e-37	[65504783,66694697]	NO	NO
Cortical surface area	3	66434643	3:66434643:C:T	1.14e-11	[65504783,66694697]	NO	NO
Cortical surface area	3	69473754	3:69473754:C:T	4.27e-14	[69193240,70540616]	NO	NO
Cortical surface area	3	69632417	3:69632417:C:T	1.43e-09	[69193240,70540616]	NO	NO
Cortical surface area	3	69945362	3:69945362:C:T	5.99e-18	[69193240,70540616]	NO	NO
Cortical surface area	3	70114499	3:70114499:T:C	1.64e-12	[69193240,70540616]	NO	NO
Cortical surface area	3	71365496	3:71365496:A:G	6.36e-11	[71103372,71882743]	NO	NO
Cortical surface area	3	71534763	3:71534763:C:T	2.44e-32	[71103372,71882743]	NO	NO
Cortical surface area	3	71632743	3:71632743:C:T	3.95e-08	[71103372,71882743]	NO	NO
Cortical surface area	3	73208064	3:73208064:T:C	2.87e-11	[72916812,73657777]	NO	NO
Cortical surface area	3	73344000	3:73344000:T:C	4.55e-12	[72916812,73657777]	NO	NO
Cortical surface area	3	73407777	3:73407777:T:C	3.44e-09	[72916812,73657777]	NO	NO
Cortical surface area	3	77047407	3:77047407:A:G	9.22e-10	[76784462,77935548]	NO	NO
Cortical surface area	3	77209260	3:77209260:G:A	3.12e-18	[76784462,77935548]	NO	NO
Cortical surface area	3	77343618	3:77343618:T:G	4.78e-26	[76784462,77935548]	NO	NO
Cortical surface area	3	77303212	3:77303212:T:A	2.42e-10	[76784462,77935548]	NO	NO
Cortical surface area	3	77408143	3:77408143:G:A	1.23e-09	[76784462,77935548]	NO	NO
Cortical surface area	3	77678306	3:77678306:G:A	5.84e-12	[76784462,77935548]	NO	NO
Cortical surface area	3	78300154	3:78300154:T:A	8.88e-12	[78030461,78580200]	NO	NO
Cortical surface area	3	79581002	3:79581002:A:AG	6e-09	[79173487,80016511]	YES	NO
Cortical surface area	3	79706168	3:79706168:C:A	6.88e-11	[79173487,80016511]	YES	NO
Cortical surface area	3	88772022	3:88772022:C:T	4.84e-18	[88125523,90747467]	NO	NO
Cortical surface area	3	88481090	3:88481090:G:A	5.32e-10	[88125523,90747467]	NO	NO
Cortical surface area	3	88919768	3:88919768:C:A	1.66e-20	[88125523,90747467]	NO	NO
Cortical surface area	3	89075241	3:89075241:G:A	2.32e-18	[88125523,90747467]	NO	NO
Cortical surface area	3	88964555	3:88964555:A:G	9.76e-13	[88125523,90747467]	NO	NO
Cortical surface area	3	89521693	3:89521693:C:T	9.58e-78	[88125523,90747467]	NO	NO
Cortical surface area	3	89502519	3:89502519:T:C	9.85e-13	[88125523,90747467]	NO	NO
Cortical surface area	3	89697561	3:89697561:C:CT	8.55e-18	[88125523,90747467]	NO	NO
Cortical surface area	3	89532086	3:89532086:T:A	1.17e-10	[88125523,90747467]	NO	NO
Cortical surface area	3	93537923	3:93537923:A:G	2.93e-15	[93272442,94070698]	YES	NO
Cortical surface area	3	98724849	3:98724849:A:G	1.36e-10	[98252017,99262573]	NO	NO
Cortical surface area	3	98896242	3:98896242:A:G	4e-09	[98252017,99262573]	NO	NO
Cortical surface area	3	104272468	3:104272468:A:G	2e-12	[103944819,105078166]	NO	NO
Cortical surface area	3	104525831	3:104525831:T:C	9.5e-11	[103944819,105078166]	NO	NO
Cortical surface area	3	104707278	3:104707278:G:A	3.72e-09	[103944819,105078166]	NO	NO
Cortical surface area	3	104654075	3:104654075:C:A	1.8e-74	[103944819,105078166]	NO	NO
Cortical surface area	3	104712013	3:104712013:C:T	3.57e-09	[103944819,105078166]	NO	NO
Cortical surface area	3	104790526	3:104790526:A:T	1.22e-11	[103944819,105078166]	NO	NO
Cortical surface area	3	113290793	3:113290793:C:A	1.29e-12	[112785481,113559149]	NO	NO
Cortical surface area	3	114925815	3:114925815:C:T	6.43e-21	[114324027,115396861]	NO	NO
Cortical surface area	3	114889697	3:114889697:G:C	7.77e-10	[114324027,115396861]	NO	NO
Cortical surface area	3	118997100	3:118997100:A:G	4.96e-28	[118653462,119310294]	NO	NO
Cortical surface area	3	118913337	3:118913337:G:A	3.84e-10	[118653462,119310294]	NO	NO
Cortical surface area	3	119045617	3:119045617:A:G	1.53e-16	[118653462,119310294]	NO	NO
Cortical surface area	3	119969796	3:119969796:T:G	4.03e-10	[119689045,120249481]	NO	NO
Cortical surface area	3	124455267	3:124455267:C:CATATT	4.09e-10	[124196195,125153881]	NO	NO
Cortical surface area	3	124561848	3:124561848:T:C	1.75e-08	[124196195,125153881]	NO	NO
Cortical surface area	3	124882278	3:124882278:T:C	8.55e-41	[124196195,125153881]	NO	NO
Cortical surface area	3	127352970	3:127352970:G:A	1.74e-11	[127098226,127602970]	NO	NO
Cortical surface area	3	132773660	3:132773660:G:A	2.7e-19	[132397420,133360615]	NO	NO
Cortical surface area	3	132751699	3:132751699:T:C	9.89e-14	[132397420,133360615]	NO	NO
Cortical surface area	3	133903883	3:133903883:GT:G	2.04e-09	[133577259,134240748]	NO	NO
Cortical surface area	3	135939586	3:135939586:A:G	8.34e-18	[135375498,136924500]	NO	NO
Cortical surface area	3	136635589	3:136635589:G:C	4.35e-09	[135375498,136924500]	NO	NO
Cortical surface area	3	138696439	3:138696439:C:T	1.5e-16	[138441912,139057620]	NO	NO
Cortical surface area	3	141093285	3:141093285:C:T	2.09e-08	[140843285,142795092]	NO	NO
Cortical surface area	3	141674923	3:141674923:T:C	1.98e-34	[140843285,142795092]	NO	NO
Cortical surface area	3	141566825	3:141566825:T:C	9.35e-09	[140843285,142795092]	NO	NO
Cortical surface area	3	141836912	3:141836912:T:C	1.83e-09	[140843285,142795092]	NO	NO
Cortical surface area	3	142006452	3:142006452:A:C	4.02e-15	[140843285,142795092]	NO	NO
Cortical surface area	3	143471201	3:143471201:A:C	1.3e-17	[143219575,143731032]	NO	NO
Cortical surface area	3	146732553	3:146732553:A:C	1.59e-12	[146478663,148141874]	NO	NO
Cortical surface area	3	147106319	3:147106319:T:C	3.63e-205	[146478663,148141874]	NO	NO
Cortical surface area	3	147025368	3:147025368:G:A	2.5e-20	[146478663,148141874]	NO	NO
Cortical surface area	3	147339282	3:147339282:C:T	1.09e-12	[146478663,148141874]	NO	NO
Cortical surface area	3	147033126	3:147033126:T:G	2.7e-09	[146478663,148141874]	NO	NO
Cortical surface area	3	147218844	3:147218844:C:CCAT	1.14e-14	[146478663,148141874]	NO	NO
Cortical surface area	3	147056955	3:147056955:G:T	3.27e-10	[146478663,148141874]	NO	NO
Cortical surface area	3	147094222	3:147094222:A:G	4.95e-19	[146478663,148141874]	NO	NO
Cortical surface area	3	147351456	3:147351456:T:C	5.32e-20	[146478663,148141874]	NO	NO
Cortical surface area	3	147092605	3:147092605:G:T	2.68e-11	[146478663,148141874]	NO	NO
Cortical surface area	3	147173469	3:147173469:ATG:A	1.37e-18	[146478663,148141874]	NO	NO
Cortical surface area	3	147180197	3:147180197:A:G	6.56e-11	[146478663,148141874]	NO	NO
Cortical surface area	3	147248662	3:147248662:T:C	8.48e-12	[146478663,148141874]	NO	NO
Cortical surface area	3	147407077	3:147407077:C:T	1.18e-11	[146478663,148141874]	NO	NO
Cortical surface area	3	147453795	3:147453795:G:A	5.22e-10	[146478663,148141874]	NO	NO
Cortical surface area	3	147787204	3:147787204:C:T	1.77e-08	[146478663,148141874]	NO	NO
Cortical surface area	3	147795240	3:147795240:A:T	8.43e-09	[146478663,148141874]	NO	NO
Cortical surface area	3	147891874	3:147891874:T:C	2.15e-17	[146478663,148141874]	NO	NO
Cortical surface area	3	147865583	3:147865583:T:A	3.73e-10	[146478663,148141874]	NO	NO
Cortical surface area	3	148620128	3:148620128:G:T	1.95e-13	[148330879,148876265]	YES	NO
Cortical surface area	3	149962250	3:149962250:G:C	2.94e-08	[149712250,150494744]	NO	NO
Cortical surface area	3	150083221	3:150083221:A:C	3.01e-13	[149712250,150494744]	NO	NO
Cortical surface area	3	150192605	3:150192605:G:A	2.57e-22	[149712250,150494744]	NO	NO
Cortical surface area	3	152189544	3:152189544:G:T	1.89e-08	[151939544,152439544]	NO	NO
Cortical surface area	3	153237150	3:153237150:G:A	3.01e-09	[152987150,153491610]	YES	YES
Cortical surface area	3	156786544	3:156786544:A:G	2.26e-08	[156536544,157036544]	YES	NO
Cortical surface area	3	168751700	3:168751700:CT:C	1.57e-12	[168381225,169226021]	NO	NO
Cortical surface area	3	170991408	3:170991408:T:C	3.58e-09	[170733639,171252654]	YES	NO
Cortical surface area	3	172676893	3:172676893:ATC:A	4.15e-10	[172423926,172947265]	YES	NO
Cortical surface area	3	177312876	3:177312876:T:C	1.26e-58	[177012845,177719762]	NO	NO
Cortical surface area	3	177267740	3:177267740:T:C	4.36e-13	[177012845,177719762]	NO	NO
Cortical surface area	3	177469762	3:177469762:A:G	3.36e-09	[177012845,177719762]	NO	NO
Cortical surface area	3	184227624	3:184227624:G:A	2e-14	[183970498,184488344]	NO	NO
Cortical surface area	3	185469678	3:185469678:G:A	4.61e-08	[185219678,185719678]	YES	YES
Cortical surface area	3	190636749	3:190636749:A:T	2.26e-54	[190341272,190929913]	NO	NO
Cortical surface area	3	193517597	3:193517597:G:A	8.4e-23	[193236579,194070518]	NO	NO
Cortical surface area	3	193575743	3:193575743:C:A	1.19e-13	[193236579,194070518]	NO	NO
Cortical surface area	3	193810750	3:193810750:T:C	3.57e-28	[193236579,194070518]	NO	NO
Cortical surface area	3	196867871	3:196867871:A:G	3.24e-08	[196575398,197117871]	YES	YES
Cortical surface area	4	1002848	4:1002848:A:T	3.81e-23	[701179,2056519]	NO	NO
Cortical surface area	4	1013382	4:1013382:A:G	1.11e-11	[701179,2056519]	NO	NO
Cortical surface area	4	1087393	4:1087393:T:G	1.5e-08	[701179,2056519]	NO	NO
Cortical surface area	4	1757235	4:1757235:G:T	1.86e-36	[701179,2056519]	NO	NO
Cortical surface area	4	1796539	4:1796539:T:A	4.55e-25	[701179,2056519]	NO	NO
Cortical surface area	4	1784403	4:1784403:T:C	1.62e-08	[701179,2056519]	NO	NO
Cortical surface area	4	1806519	4:1806519:T:C	2.35e-18	[701179,2056519]	NO	NO
Cortical surface area	4	4500129	4:4500129:C:T	2.57e-08	[4250129,5030454]	YES	NO
Cortical surface area	4	4766534	4:4766534:A:G	3.07e-13	[4250129,5030454]	YES	NO
Cortical surface area	4	7848144	4:7848144:T:C	1.2e-11	[7596240,8197839]	NO	NO
Cortical surface area	4	10129743	4:10129743:T:C	5.31e-09	[9876978,10418447]	NO	NO
Cortical surface area	4	17252360	4:17252360:G:A	3.68e-09	[17002360,17512432]	NO	NO
Cortical surface area	4	18029836	4:18029836:AT:A	6.48e-10	[17618058,18285250]	NO	NO
Cortical surface area	4	19073685	4:19073685:T:A	3.63e-64	[18823685,20571977]	NO	NO
Cortical surface area	4	19087520	4:19087520:G:A	3.74e-22	[18823685,20571977]	NO	NO
Cortical surface area	4	19194490	4:19194490:T:C	3.58e-13	[18823685,20571977]	NO	NO
Cortical surface area	4	19551090	4:19551090:AT:A	1.54e-08	[18823685,20571977]	NO	NO
Cortical surface area	4	20121121	4:20121121:A:G	1.06e-19	[18823685,20571977]	NO	NO
Cortical surface area	4	20285515	4:20285515:C:A	2.1e-10	[18823685,20571977]	NO	NO
Cortical surface area	4	20295112	4:20295112:C:A	5.29e-15	[18823685,20571977]	NO	NO
Cortical surface area	4	20321434	4:20321434:A:C	4.62e-09	[18823685,20571977]	NO	NO
Cortical surface area	4	30917237	4:30917237:T:C	3.26e-08	[30667237,31209927]	YES	NO
Cortical surface area	4	38610478	4:38610478:A:G	1.27e-08	[38359196,38941024]	YES	NO
Cortical surface area	4	40847540	4:40847540:G:A	1.93e-10	[40583513,41462540]	YES	YES
Cortical surface area	4	41212540	4:41212540:A:G	4.25e-10	[40583513,41462540]	YES	YES
Cortical surface area	4	48806197	4:48806197:G:A	3.54e-15	[48231149,49187377]	NO	NO
Cortical surface area	4	52856588	4:52856588:A:G	9.32e-09	[52522595,54125666]	NO	NO
Cortical surface area	4	53210661	4:53210661:A:G	3.22e-15	[52522595,54125666]	NO	NO
Cortical surface area	4	53603336	4:53603336:G:A	7.04e-23	[52522595,54125666]	NO	NO
Cortical surface area	4	53739856	4:53739856:G:C	1.5e-82	[52522595,54125666]	NO	NO
Cortical surface area	4	53617867	4:53617867:A:G	3.52e-08	[52522595,54125666]	NO	NO
Cortical surface area	4	53736193	4:53736193:C:T	7.24e-09	[52522595,54125666]	NO	NO
Cortical surface area	4	53758008	4:53758008:G:C	1.74e-09	[52522595,54125666]	NO	NO
Cortical surface area	4	53871388	4:53871388:A:G	1.86e-11	[52522595,54125666]	NO	NO
Cortical surface area	4	54801934	4:54801934:C:A	4.19e-08	[54551934,55354604]	YES	NO
Cortical surface area	4	54976454	4:54976454:G:A	7.67e-15	[54551934,55354604]	YES	NO
Cortical surface area	4	55082158	4:55082158:A:G	9.05e-13	[54551934,55354604]	YES	NO
Cortical surface area	4	57743937	4:57743937:A:C	8.76e-09	[57488345,57993937]	NO	NO
Cortical surface area	4	66159420	4:66159420:T:C	5.19e-10	[65688593,66776528]	NO	NO
Cortical surface area	4	66486425	4:66486425:C:T	1.38e-09	[65688593,66776528]	NO	NO
Cortical surface area	4	73413796	4:73413796:T:C	4.5e-29	[73006772,73804072]	NO	NO
Cortical surface area	4	73545734	4:73545734:C:G	2.67e-10	[73006772,73804072]	NO	NO
Cortical surface area	4	77560294	4:77560294:C:T	7.83e-14	[77247756,77913262]	NO	NO
Cortical surface area	4	81758685	4:81758685:C:T	6.56e-10	[80971136,82202637]	YES	YES
Cortical surface area	4	81952637	4:81952637:A:T	2e-08	[80971136,82202637]	YES	YES
Cortical surface area	4	83948874	4:83948874:CA:C	3.4e-08	[83698874,84198874]	YES	YES
Cortical surface area	4	87984331	4:87984331:G:A	5.41e-18	[87101361,88398762]	YES	NO
Cortical surface area	4	87839844	4:87839844:A:G	1.63e-08	[87101361,88398762]	YES	NO
Cortical surface area	4	89744825	4:89744825:G:A	3.22e-14	[89471604,90297780]	NO	NO
Cortical surface area	4	95175682	4:95175682:A:G	4.03e-17	[94704519,95846744]	NO	NO
Cortical surface area	4	95489556	4:95489556:A:AC	1.54e-14	[94704519,95846744]	NO	NO
Cortical surface area	4	96796951	4:96796951:C:T	1.33e-12	[96418418,97057411]	YES	NO
Cortical surface area	4	97943833	4:97943833:C:A	1.25e-12	[97667772,99351401]	NO	NO
Cortical surface area	4	97950728	4:97950728:G:T	1.66e-09	[97667772,99351401]	NO	NO
Cortical surface area	4	98972150	4:98972150:T:C	2.85e-09	[97667772,99351401]	NO	NO
Cortical surface area	4	103188709	4:103188709:T:C	4.05e-41	[102416785,104206956]	NO	NO
Cortical surface area	4	103881079	4:103881079:A:G	2.04e-10	[102416785,104206956]	NO	NO
Cortical surface area	4	106009763	4:106009763:A:G	2.02e-14	[105759763,106401843]	NO	NO
Cortical surface area	4	113417238	4:113417238:T:C	1.12e-21	[113102397,114011154]	NO	NO
Cortical surface area	4	116033059	4:116033059:A:G	4.2e-09	[115775508,116303739]	YES	YES
Cortical surface area	4	119006102	4:119006102:T:C	1.89e-11	[118721472,120129137]	NO	NO
Cortical surface area	4	119299978	4:119299978:C:T	1.59e-19	[118721472,120129137]	NO	NO
Cortical surface area	4	119361847	4:119361847:C:CA	8.58e-09	[118721472,120129137]	NO	NO
Cortical surface area	4	119408156	4:119408156:A:C	1.94e-08	[118721472,120129137]	NO	NO
Cortical surface area	4	121719584	4:121719584:TA:T	4.59e-10	[121300384,122015788]	NO	NO
Cortical surface area	4	122811172	4:122811172:A:T	2.64e-08	[122561172,123061172]	YES	NO
Cortical surface area	4	124267871	4:124267871:G:C	2.54e-15	[123536424,125246579]	NO	NO
Cortical surface area	4	124426879	4:124426879:G:C	1.91e-08	[123536424,125246579]	NO	NO
Cortical surface area	4	124803794	4:124803794:A:AG	2.41e-09	[123536424,125246579]	NO	NO
Cortical surface area	4	124996579	4:124996579:C:G	2.82e-08	[123536424,125246579]	NO	NO
Cortical surface area	4	127990303	4:127990303:G:C	5.48e-15	[127523649,128609037]	NO	NO
Cortical surface area	4	127930510	4:127930510:T:C	7.37e-10	[127523649,128609037]	NO	NO
Cortical surface area	4	128134158	4:128134158:G:A	6.9e-12	[127523649,128609037]	NO	NO
Cortical surface area	4	129378960	4:129378960:A:G	1.34e-16	[128985227,129630839]	NO	NO
Cortical surface area	4	139723957	4:139723957:G:T	4.52e-08	[139473957,140412960]	NO	NO
Cortical surface area	4	139995689	4:139995689:C:G	1.39e-15	[139473957,140412960]	NO	NO
Cortical surface area	4	145381766	4:145381766:C:A	1.07e-36	[144977600,146424040]	NO	NO
Cortical surface area	4	145448553	4:145448553:G:A	2.79e-14	[144977600,146424040]	NO	NO
Cortical surface area	4	145662842	4:145662842:T:C	8.44e-17	[144977600,146424040]	NO	NO
Cortical surface area	4	145659064	4:145659064:C:T	1.11e-27	[144977600,146424040]	NO	NO
Cortical surface area	4	145580172	4:145580172:C:T	2.84e-12	[144977600,146424040]	NO	NO
Cortical surface area	4	146933473	4:146933473:A:C	9.32e-13	[146627947,147227979]	NO	NO
Cortical surface area	4	149427788	4:149427788:G:T	1.03e-10	[149154854,149810307]	YES	NO
Cortical surface area	4	151068625	4:151068625:A:AT	2.05e-10	[150816145,151460677]	YES	NO
Cortical surface area	4	154385570	4:154385570:C:T	1.68e-11	[154124506,155018011]	NO	NO
Cortical surface area	4	154693053	4:154693053:C:A	4.5e-13	[154124506,155018011]	NO	NO
Cortical surface area	4	157071307	4:157071307:C:T	2.53e-15	[156621631,158118564]	NO	NO
Cortical surface area	4	156935238	4:156935238:A:G	1.42e-09	[156621631,158118564]	NO	NO
Cortical surface area	4	157464628	4:157464628:T:C	2.13e-11	[156621631,158118564]	NO	NO
Cortical surface area	4	157433255	4:157433255:C:T	5.9e-09	[156621631,158118564]	NO	NO
Cortical surface area	4	157506587	4:157506587:C:T	1.81e-12	[156621631,158118564]	NO	NO
Cortical surface area	4	157709481	4:157709481:T:C	2.15e-35	[156621631,158118564]	NO	NO
Cortical surface area	4	157676228	4:157676228:G:T	2.88e-12	[156621631,158118564]	NO	NO
Cortical surface area	4	159926259	4:159926259:A:T	8.56e-14	[159401875,160390733]	NO	NO
Cortical surface area	4	160136995	4:160136995:A:T	4.15e-12	[159401875,160390733]	NO	NO
Cortical surface area	4	164910216	4:164910216:C:A	4.1e-11	[164660216,165160589]	NO	NO
Cortical surface area	4	166745794	4:166745794:G:T	6.34e-12	[166455990,167099878]	NO	NO
Cortical surface area	4	177780729	4:177780729:C:T	6.29e-11	[177504913,178080044]	NO	NO
Cortical surface area	4	187385465	4:187385465:A:G	1.61e-34	[187115960,187640722]	NO	NO
Cortical surface area	4	187387204	4:187387204:C:T	2.54e-09	[187115960,187640722]	NO	NO
Cortical surface area	5	9544544	5:9544544:C:T	4.21e-09	[9294544,9797273]	NO	NO
Cortical surface area	5	11391425	5:11391425:T:A	9.03e-09	[11133870,11641425]	YES	YES
Cortical surface area	5	15709729	5:15709729:TA:T	5.61e-11	[15431071,16026498]	YES	NO
Cortical surface area	5	36774211	5:36774211:T:C	1.16e-14	[36486906,37034347]	NO	NO
Cortical surface area	5	52773279	5:52773279:G:A	2.21e-08	[52520301,53761060]	NO	NO
Cortical surface area	5	53314133	5:53314133:G:A	1.85e-15	[52520301,53761060]	NO	NO
Cortical surface area	5	53496587	5:53496587:C:T	3.26e-10	[52520301,53761060]	NO	NO
Cortical surface area	5	54520438	5:54520438:A:G	2.71e-08	[54270438,54779630]	YES	YES
Cortical surface area	5	56040949	5:56040949:A:C	1.49e-24	[55740641,56527372]	NO	NO
Cortical surface area	5	56155672	5:56155672:G:A	5.62e-09	[55740641,56527372]	NO	NO
Cortical surface area	5	59570258	5:59570258:G:A	6.84e-12	[59320258,62203289]	NO	NO
Cortical surface area	5	60324596	5:60324596:T:C	6.36e-86	[59320258,62203289]	NO	NO
Cortical surface area	5	60024812	5:60024812:T:C	8.74e-25	[59320258,62203289]	NO	NO
Cortical surface area	5	59759107	5:59759107:T:C	4.5e-11	[59320258,62203289]	NO	NO
Cortical surface area	5	60495715	5:60495715:G:A	3.56e-33	[59320258,62203289]	NO	NO
Cortical surface area	5	60001935	5:60001935:C:CA	1.06e-10	[59320258,62203289]	NO	NO
Cortical surface area	5	60095384	5:60095384:T:C	3.89e-08	[59320258,62203289]	NO	NO
Cortical surface area	5	60204409	5:60204409:T:TA	7.84e-11	[59320258,62203289]	NO	NO
Cortical surface area	5	60340870	5:60340870:A:AC	1.55e-11	[59320258,62203289]	NO	NO
Cortical surface area	5	60592791	5:60592791:A:G	7.24e-11	[59320258,62203289]	NO	NO
Cortical surface area	5	61049055	5:61049055:C:A	7.05e-09	[59320258,62203289]	NO	NO
Cortical surface area	5	61191394	5:61191394:G:A	1.06e-08	[59320258,62203289]	NO	NO
Cortical surface area	5	61849653	5:61849653:C:T	2.19e-10	[59320258,62203289]	YES	YES
Cortical surface area	5	64611738	5:64611738:A:AT	1.94e-10	[64357322,64918472]	NO	NO
Cortical surface area	5	65213108	5:65213108:T:G	6.4e-09	[64956531,65472898]	YES	YES
Cortical surface area	5	66137958	5:66137958:G:C	3.06e-23	[65675955,66791514]	NO	NO
Cortical surface area	5	66541514	5:66541514:G:A	3.5e-08	[65675955,66791514]	NO	NO
Cortical surface area	5	67824690	5:67824690:T:C	1.83e-11	[67526334,68074690]	YES	NO
Cortical surface area	5	71254892	5:71254892:C:G	1.62e-09	[70999981,71504892]	YES	YES
Cortical surface area	5	72256434	5:72256434:T:C	8.94e-13	[71852924,72845932]	NO	NO
Cortical surface area	5	72595932	5:72595932:C:G	1.44e-08	[71852924,72845932]	NO	NO
Cortical surface area	5	75996909	5:75996909:A:G	1.13e-10	[75685631,76296939]	YES	NO
Cortical surface area	5	79896220	5:79896220:A:AAT	6.76e-11	[79646220,80254285]	NO	NO
Cortical surface area	5	81154017	5:81154017:AC:A	1.37e-10	[80828446,83185601]	NO	NO
Cortical surface area	5	81147151	5:81147151:A:G	5.92e-13	[80828446,83185601]	NO	NO
Cortical surface area	5	81717102	5:81717102:A:C	4.64e-09	[80828446,83185601]	NO	NO
Cortical surface area	5	81842023	5:81842023:C:T	1.45e-46	[80828446,83185601]	NO	NO
Cortical surface area	5	81734973	5:81734973:T:TTTTTA	1.15e-09	[80828446,83185601]	NO	NO
Cortical surface area	5	81800313	5:81800313:A:G	2.35e-09	[80828446,83185601]	NO	NO
Cortical surface area	5	82350191	5:82350191:A:G	1.68e-13	[80828446,83185601]	NO	NO
Cortical surface area	5	82753402	5:82753402:G:A	1.15e-10	[80828446,83185601]	NO	NO
Cortical surface area	5	82768986	5:82768986:A:G	4.47e-14	[80828446,83185601]	NO	NO
Cortical surface area	5	82852578	5:82852578:T:A	2.45e-51	[80828446,83185601]	NO	NO
Cortical surface area	5	82810102	5:82810102:T:C	2.7e-11	[80828446,83185601]	NO	NO
Cortical surface area	5	82857870	5:82857870:C:T	1.5e-08	[80828446,83185601]	NO	NO
Cortical surface area	5	87560034	5:87560034:T:C	3.25e-12	[87098308,88473420]	NO	NO
Cortical surface area	5	88002653	5:88002653:C:T	3.38e-19	[87098308,88473420]	NO	NO
Cortical surface area	5	90003131	5:90003131:G:A	4.77e-09	[89753131,90253131]	NO	NO
Cortical surface area	5	90929423	5:90929423:A:G	3.17e-11	[90590294,91322035]	YES	YES
Cortical surface area	5	91941526	5:91941526:C:T	1.62e-14	[91612812,94559567]	NO	NO
Cortical surface area	5	91939062	5:91939062:C:T	2.77e-11	[91612812,94559567]	NO	NO
Cortical surface area	5	91902326	5:91902326:T:C	4.07e-12	[91612812,94559567]	NO	NO
Cortical surface area	5	92034730	5:92034730:C:T	7.14e-27	[91612812,94559567]	NO	NO
Cortical surface area	5	92012438	5:92012438:G:A	6.48e-35	[91612812,94559567]	NO	NO
Cortical surface area	5	92052005	5:92052005:A:T	3.07e-08	[91612812,94559567]	NO	NO
Cortical surface area	5	92067034	5:92067034:T:G	5.69e-21	[91612812,94559567]	NO	NO
Cortical surface area	5	92533341	5:92533341:A:T	2.4e-16	[91612812,94559567]	NO	NO
Cortical surface area	5	92186059	5:92186059:C:T	3.05e-64	[91612812,94559567]	NO	NO
Cortical surface area	5	92113793	5:92113793:A:C	8.73e-18	[91612812,94559567]	NO	NO
Cortical surface area	5	92306662	5:92306662:C:T	4.27e-21	[91612812,94559567]	NO	NO
Cortical surface area	5	92180071	5:92180071:T:C	9.32e-17	[91612812,94559567]	NO	NO
Cortical surface area	5	92274207	5:92274207:C:A	2.03e-08	[91612812,94559567]	NO	NO
Cortical surface area	5	92290203	5:92290203:T:C	1.38e-11	[91612812,94559567]	NO	NO
Cortical surface area	5	92488062	5:92488062:G:A	9.51e-13	[91612812,94559567]	NO	NO
Cortical surface area	5	93564643	5:93564643:C:A	4.25e-22	[91612812,94559567]	NO	NO
Cortical surface area	5	92631897	5:92631897:G:C	1.3e-14	[91612812,94559567]	NO	NO
Cortical surface area	5	92635678	5:92635678:A:C	4.27e-44	[91612812,94559567]	NO	NO
Cortical surface area	5	92636386	5:92636386:T:C	1.74e-27	[91612812,94559567]	NO	NO
Cortical surface area	5	92943487	5:92943487:T:C	2.29e-57	[91612812,94559567]	NO	NO
Cortical surface area	5	92677537	5:92677537:T:G	3.98e-09	[91612812,94559567]	NO	NO
Cortical surface area	5	92933747	5:92933747:C:T	1.45e-25	[91612812,94559567]	NO	NO
Cortical surface area	5	92872910	5:92872910:G:GA	8.7e-85	[91612812,94559567]	NO	NO
Cortical surface area	5	93228046	5:93228046:C:T	2.59e-45	[91612812,94559567]	NO	NO
Cortical surface area	5	92710216	5:92710216:A:G	2.07e-10	[91612812,94559567]	NO	NO
Cortical surface area	5	92918977	5:92918977:GTC:G	2.27e-11	[91612812,94559567]	NO	NO
Cortical surface area	5	93541242	5:93541242:T:C	3.15e-09	[91612812,94559567]	NO	NO
Cortical surface area	5	92941957	5:92941957:G:GAC	8.3e-09	[91612812,94559567]	NO	NO
Cortical surface area	5	92964711	5:92964711:T:G	4.42e-08	[91612812,94559567]	NO	NO
Cortical surface area	5	93700094	5:93700094:T:C	1.88e-12	[91612812,94559567]	NO	NO
Cortical surface area	5	93697852	5:93697852:T:C	4.8e-12	[91612812,94559567]	NO	NO
Cortical surface area	5	93791207	5:93791207:C:G	2.82e-10	[91612812,94559567]	NO	NO
Cortical surface area	5	94072931	5:94072931:G:A	6.58e-44	[91612812,94559567]	NO	NO
Cortical surface area	5	93925546	5:93925546:TA:T	5.95e-18	[91612812,94559567]	NO	NO
Cortical surface area	5	94118306	5:94118306:A:T	1.84e-08	[91612812,94559567]	NO	NO
Cortical surface area	5	94255391	5:94255391:A:T	1e-13	[91612812,94559567]	NO	NO
Cortical surface area	5	96121715	5:96121715:T:C	2.58e-08	[95871715,96376308]	YES	YES
Cortical surface area	5	102053558	5:102053558:A:G	3.57e-24	[101334734,102945734]	NO	NO
Cortical surface area	5	102658770	5:102658770:T:C	1.05e-11	[101334734,102945734]	YES	YES
Cortical surface area	5	102537200	5:102537200:G:T	3.17e-08	[101334734,102945734]	NO	NO
Cortical surface area	5	106449853	5:106449853:T:C	1.95e-08	[106198774,107987760]	NO	NO
Cortical surface area	5	106483511	5:106483511:A:C	1.03e-09	[106198774,107987760]	NO	NO
Cortical surface area	5	106909839	5:106909839:C:T	2.25e-17	[106198774,107987760]	NO	NO
Cortical surface area	5	107048074	5:107048074:G:A	2.95e-09	[106198774,107987760]	NO	NO
Cortical surface area	5	107308489	5:107308489:C:T	2.24e-10	[106198774,107987760]	NO	NO
Cortical surface area	5	107485907	5:107485907:G:A	8.26e-12	[106198774,107987760]	NO	NO
Cortical surface area	5	112155793	5:112155793:C:G	1.53e-15	[111738599,112616678]	NO	NO
Cortical surface area	5	112366678	5:112366678:G:A	2.61e-08	[111738599,112616678]	NO	NO
Cortical surface area	5	116659571	5:116659571:G:A	1.91e-11	[116296046,116913320]	NO	NO
Cortical surface area	5	121518309	5:121518309:A:G	4.39e-10	[121260586,123767721]	NO	NO
Cortical surface area	5	121667231	5:121667231:G:C	4.82e-10	[121260586,123767721]	NO	NO
Cortical surface area	5	121812379	5:121812379:A:G	7.47e-11	[121260586,123767721]	NO	NO
Cortical surface area	5	121921114	5:121921114:G:A	6.56e-10	[121260586,123767721]	NO	NO
Cortical surface area	5	122261746	5:122261746:T:TA	2.63e-29	[121260586,123767721]	NO	NO
Cortical surface area	5	122005445	5:122005445:A:G	9.71e-14	[121260586,123767721]	NO	NO
Cortical surface area	5	122683012	5:122683012:T:A	3.83e-08	[121260586,123767721]	NO	NO
Cortical surface area	5	123515729	5:123515729:A:G	1.41e-11	[121260586,123767721]	NO	NO
Cortical surface area	5	124082037	5:124082037:C:A	7.05e-12	[123793244,124999220]	NO	NO
Cortical surface area	5	124260718	5:124260718:C:T	3.68e-19	[123793244,124999220]	NO	NO
Cortical surface area	5	124349790	5:124349790:G:A	2.23e-18	[123793244,124999220]	NO	NO
Cortical surface area	5	124320184	5:124320184:T:C	2.87e-08	[123793244,124999220]	NO	NO
Cortical surface area	5	124643125	5:124643125:G:A	7.41e-12	[123793244,124999220]	NO	NO
Cortical surface area	5	127502126	5:127502126:T:C	2.75e-08	[127252126,132083599]	NO	NO
Cortical surface area	5	127874849	5:127874849:C:T	1.09e-18	[127252126,132083599]	NO	NO
Cortical surface area	5	127787610	5:127787610:C:T	2e-14	[127252126,132083599]	NO	NO
Cortical surface area	5	128332219	5:128332219:C:A	3.22e-13	[127252126,132083599]	NO	NO
Cortical surface area	5	128308192	5:128308192:T:A	1.75e-10	[127252126,132083599]	NO	NO
Cortical surface area	5	128684677	5:128684677:T:C	1.06e-19	[127252126,132083599]	NO	NO
Cortical surface area	5	128737908	5:128737908:C:T	3.07e-32	[127252126,132083599]	NO	NO
Cortical surface area	5	128734008	5:128734008:G:C	2.56e-139	[127252126,132083599]	NO	NO
Cortical surface area	5	128743632	5:128743632:A:C	6.06e-09	[127252126,132083599]	NO	NO
Cortical surface area	5	128922412	5:128922412:G:C	2.49e-44	[127252126,132083599]	NO	NO
Cortical surface area	5	129050097	5:129050097:T:C	4.41e-21	[127252126,132083599]	NO	NO
Cortical surface area	5	129382000	5:129382000:G:C	1.2e-08	[127252126,132083599]	NO	NO
Cortical surface area	5	131562900	5:131562900:T:C	7.18e-26	[127252126,132083599]	NO	NO
Cortical surface area	5	131543971	5:131543971:T:G	2.31e-09	[127252126,132083599]	NO	NO
Cortical surface area	5	135440364	5:135440364:A:G	8.12e-10	[135190364,135775557]	YES	NO
Cortical surface area	5	139053438	5:139053438:AG:A	1.06e-11	[138778810,139351765]	YES	YES
Cortical surface area	5	146006858	5:146006858:G:A	7.24e-11	[145756858,146273869]	YES	YES
Cortical surface area	5	146902304	5:146902304:T:C	1.21e-08	[146652304,147152304]	YES	NO
Cortical surface area	5	148663992	5:148663992:A:C	1.05e-22	[148413072,148928775]	NO	NO
Cortical surface area	5	151149262	5:151149262:C:T	3.29e-19	[150861863,151573905]	YES	NO
Cortical surface area	5	163665033	5:163665033:T:C	1.67e-09	[163411517,163915033]	YES	YES
Cortical surface area	5	167723152	5:167723152:T:C	4e-08	[167468060,168113844]	YES	NO
Cortical surface area	5	167863844	5:167863844:A:G	2.74e-08	[167468060,168113844]	YES	NO
Cortical surface area	5	170778824	5:170778824:C:T	5.99e-36	[170523743,171889152]	NO	NO
Cortical surface area	5	170859002	5:170859002:A:G	5.69e-12	[170523743,171889152]	NO	NO
Cortical surface area	5	170848181	5:170848181:A:G	4.65e-13	[170523743,171889152]	NO	NO
Cortical surface area	5	171073807	5:171073807:T:C	7.51e-10	[170523743,171889152]	NO	NO
Cortical surface area	5	171128464	5:171128464:C:T	9.03e-15	[170523743,171889152]	NO	NO
Cortical surface area	5	171639152	5:171639152:T:C	3.75e-08	[170523743,171889152]	YES	YES
Cortical surface area	5	172927862	5:172927862:C:T	5.39e-10	[172674384,173644975]	NO	NO
Cortical surface area	5	173291873	5:173291873:T:G	1.44e-15	[172674384,173644975]	NO	NO
Cortical surface area	5	174161249	5:174161249:G:A	1.15e-13	[173893370,174415815]	NO	NO
Cortical surface area	5	176867207	5:176867207:C:T	8.04e-12	[176598019,177243284]	NO	NO
Cortical surface area	5	176993284	5:176993284:G:C	4.43e-08	[176598019,177243284]	NO	NO
Cortical surface area	5	178547313	5:178547313:A:C	1.39e-14	[178197526,179292400]	NO	NO
Cortical surface area	5	179002092	5:179002092:A:G	1.43e-09	[178197526,179292400]	NO	NO
Cortical surface area	5	179729328	5:179729328:T:C	2.9e-12	[179476223,180034709]	NO	NO
Cortical surface area	5	179771849	5:179771849:G:A	3.97e-12	[179476223,180034709]	NO	NO
Cortical surface area	6	797811	6:797811:T:C	1.03e-21	[542837,1132605]	NO	NO
Cortical surface area	6	875493	6:875493:A:G	1.46e-16	[542837,1132605]	NO	NO
Cortical surface area	6	1389548	6:1389548:G:C	6.43e-12	[1138229,1639548]	NO	NO
Cortical surface area	6	2454367	6:2454367:A:G	3.58e-17	[2115898,2705730]	NO	NO
Cortical surface area	6	3717713	6:3717713:T:C	7.47e-12	[3461302,3988268]	YES	YES
Cortical surface area	6	7118990	6:7118990:G:A	3.24e-37	[6747161,7986417]	NO	NO
Cortical surface area	6	7247248	6:7247248:C:T	3.11e-09	[6747161,7986417]	NO	NO
Cortical surface area	6	7736417	6:7736417:C:G	1.52e-08	[6747161,7986417]	YES	NO
Cortical surface area	6	15463139	6:15463139:G:T	2.47e-09	[15201898,15752083]	NO	NO
Cortical surface area	6	17975902	6:17975902:A:G	4.13e-08	[17707330,18225902]	YES	YES
Cortical surface area	6	20955332	6:20955332:C:T	1.46e-09	[20499677,21455479]	NO	NO
Cortical surface area	6	21064330	6:21064330:G:A	1.4e-10	[20499677,21455479]	NO	NO
Cortical surface area	6	21185590	6:21185590:G:A	4.05e-11	[20499677,21455479]	NO	NO
Cortical surface area	6	22596987	6:22596987:T:C	6.02e-09	[22318257,22846987]	YES	NO
Cortical surface area	6	24979164	6:24979164:A:T	4.51e-09	[24729164,33606985]	YES	YES
Cortical surface area	6	26498758	6:26498758:T:G	3.08e-18	[24729164,33606985]	NO	NO
Cortical surface area	6	26259807	6:26259807:A:G	9.3e-17	[24729164,33606985]	NO	NO
Cortical surface area	6	28541959	6:28541959:G:A	2.24e-11	[24729164,33606985]	YES	YES
Cortical surface area	6	26387808	6:26387808:A:AAAAG	3.2e-10	[24729164,33606985]	NO	NO
Cortical surface area	6	31596138	6:31596138:G:A	4.84e-21	[24729164,33606985]	NO	NO
Cortical surface area	6	29688501	6:29688501:C:A	7.23e-10	[24729164,33606985]	YES	YES
Cortical surface area	6	30821012	6:30821012:G:GA	7.24e-12	[24729164,33606985]	NO	NO
Cortical surface area	6	31697957	6:31697957:G:C	3.03e-17	[24729164,33606985]	NO	NO
Cortical surface area	6	30921364	6:30921364:T:C	1.46e-09	[24729164,33606985]	NO	NO
Cortical surface area	6	32083300	6:32083300:G:A	1.22e-09	[24729164,33606985]	NO	NO
Cortical surface area	6	32076499	6:32076499:A:G	1.81e-15	[24729164,33606985]	NO	NO
Cortical surface area	6	32516988	6:32516988:T:C	2.53e-08	[24729164,33606985]	NO	NO
Cortical surface area	6	33341424	6:33341424:C:A	2.66e-08	[24729164,33606985]	YES	NO
Cortical surface area	6	35012460	6:35012460:G:A	5.5e-14	[34654092,35672276]	NO	NO
Cortical surface area	6	35422276	6:35422276:A:G	3.4e-08	[34654092,35672276]	NO	NO
Cortical surface area	6	37142328	6:37142328:A:G	3.49e-11	[36892328,37392328]	NO	NO
Cortical surface area	6	39523837	6:39523837:T:C	4.64e-24	[39159237,39882196]	YES	NO
Cortical surface area	6	43745577	6:43745577:T:C	1.86e-12	[43485149,45649458]	NO	NO
Cortical surface area	6	43736121	6:43736121:C:A	2.6e-11	[43485149,45649458]	NO	NO
Cortical surface area	6	43826627	6:43826627:T:C	2.81e-15	[43485149,45649458]	NO	NO
Cortical surface area	6	43868986	6:43868986:G:A	6.59e-15	[43485149,45649458]	NO	NO
Cortical surface area	6	44041400	6:44041400:A:G	5.37e-23	[43485149,45649458]	NO	NO
Cortical surface area	6	44446919	6:44446919:A:C	8.15e-21	[43485149,45649458]	NO	NO
Cortical surface area	6	44970615	6:44970615:CA:C	1.47e-09	[43485149,45649458]	NO	NO
Cortical surface area	6	45097503	6:45097503:T:A	7.84e-14	[43485149,45649458]	NO	NO
Cortical surface area	6	50820940	6:50820940:C:T	4.48e-13	[50505446,51190888]	NO	NO
Cortical surface area	6	51572515	6:51572515:A:G	4.85e-15	[51322515,51925610]	YES	NO
[truncated: 1,218 more rows]

## Sheet: Table S5
Supplementary Table 5. Functional annotation of causal variants within 95% credible sets for CT- and SA-associated loci.
[truncated: 30,577 more rows]

[truncated: 9 more sheets: Table S6, Table S7, Table S8, Table S9, Table S10, Table S11, Table S12, Table S13, Table S14]
