# Supplementary material
Source: Research Square preprint supplement (doi:10.21203/rs.3.rs-8949457/v1)
Supplement: Supplementary file 1 [file ccf7ed904e54c36facdd1989.docx]

**Supplementary Figures for**

# Genetic associations with cortical thickness and surface area and their distinct developmental trajectories

**Authors**

Nana Liu1,4, Jiayuan Xu1,4, Jie Tang1,4, Jilian Fu1, Sijia Wang1, Yuan Ji1, Hui Xue1, Nannan Zhang1, Qiang Xu1, Lining Guo1, Hao Ding1, Libo Su2, Ping Wang2, Huaigui Liu1, Feng Liu1, Meng Liang3,*, Wen Qin1,*, Chunshui Yu1,*

**Affiliations**

1Department of Radiology, Tianjin Key Lab of Functional Imaging and State Key Laboratory of Experimental Hematology, Tianjin Medical University General Hospital; 300052, Tianjin, China.

2Division of Medical Technology, Tianjin Medical University; 300203, Tianjin, China.

3Division of Medical Technology and Tianjin Key Laboratory of Functional Imaging and The Province and Ministry Cosponsored Collaborative Innovation Center for Medical Epigenetics, Tianjin Medical University; 300203, Tianjin, China.

4These authors contributed equally to this work.

*Correspondence to:

Chunshui Yu, e-mail: [chunshuiyu@tmu.edu.cn](mailto:chunshuiyu@tmu.edu.cn)

Wen Qin, e-mail: wayne.wenqin@gmail.com

Meng Liang, e-mail: liangmeng@tmu.edu.cn

The whole cerebral cortex


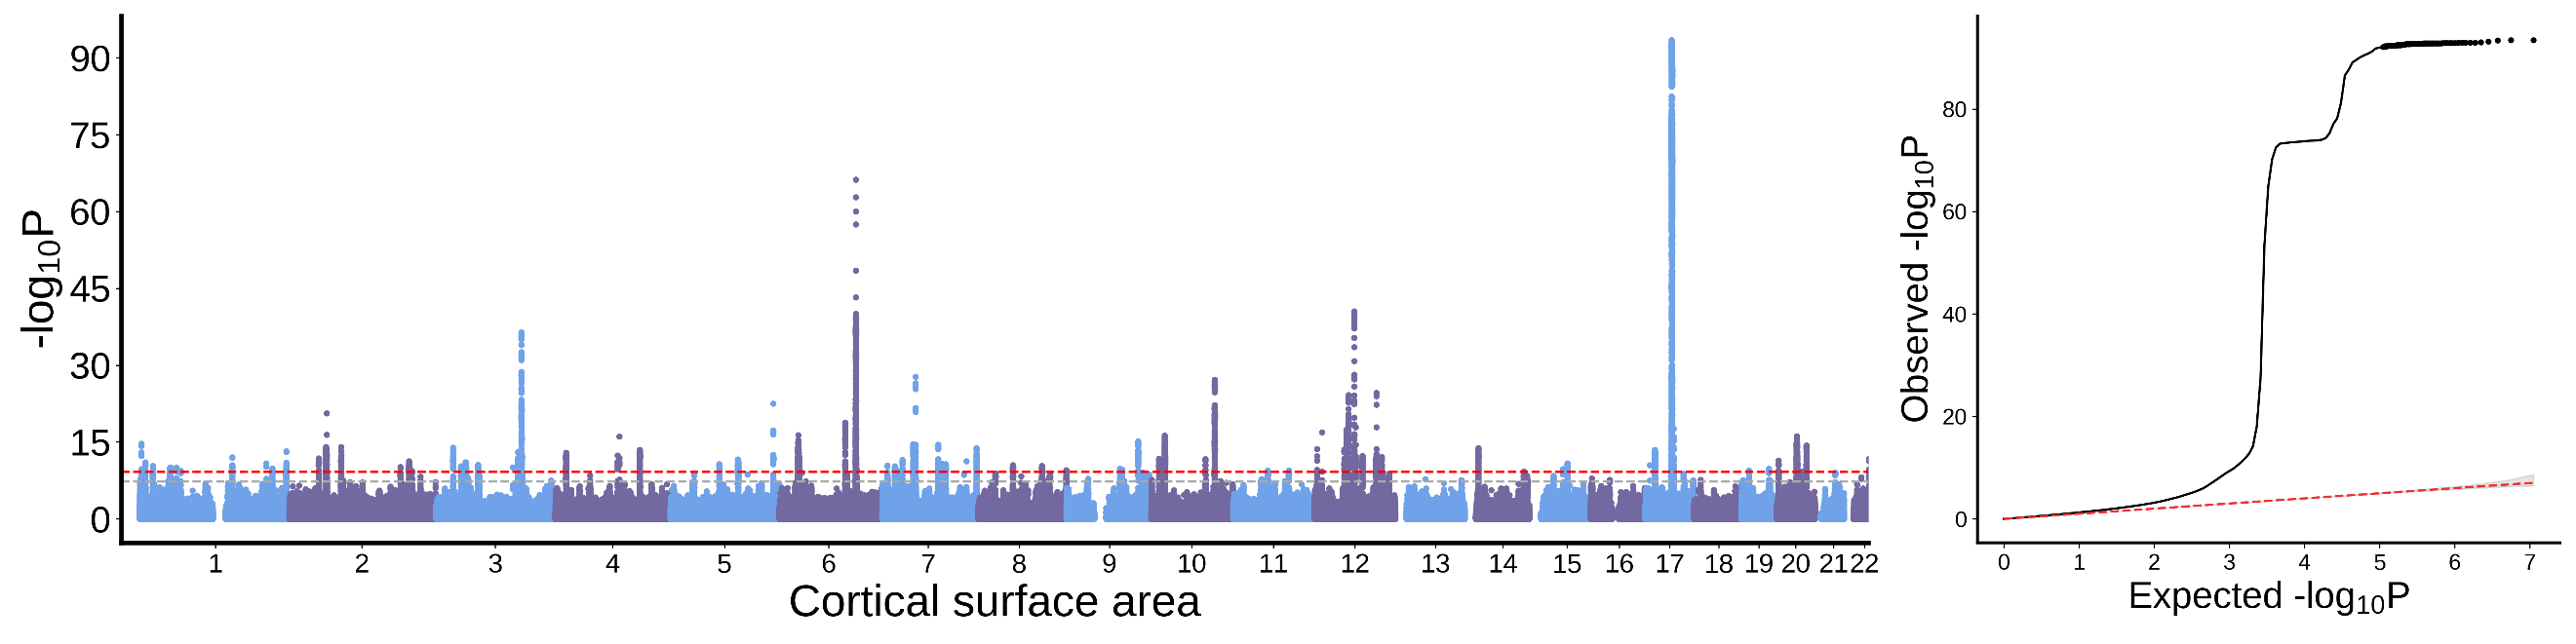


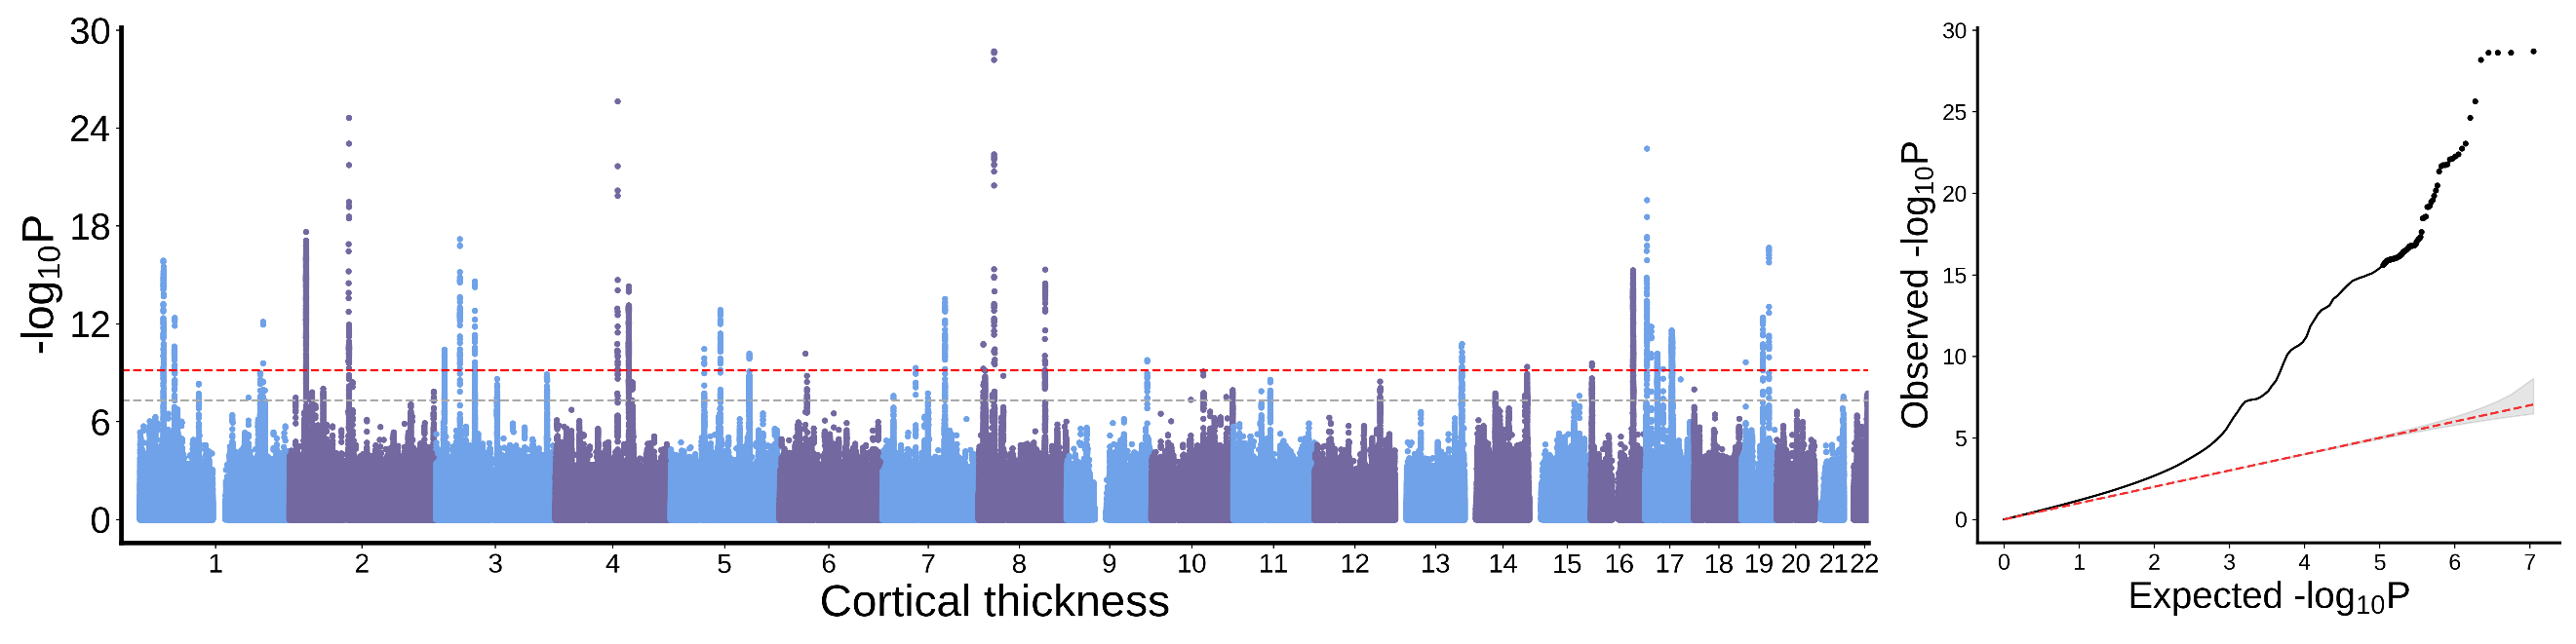


Frontal pole


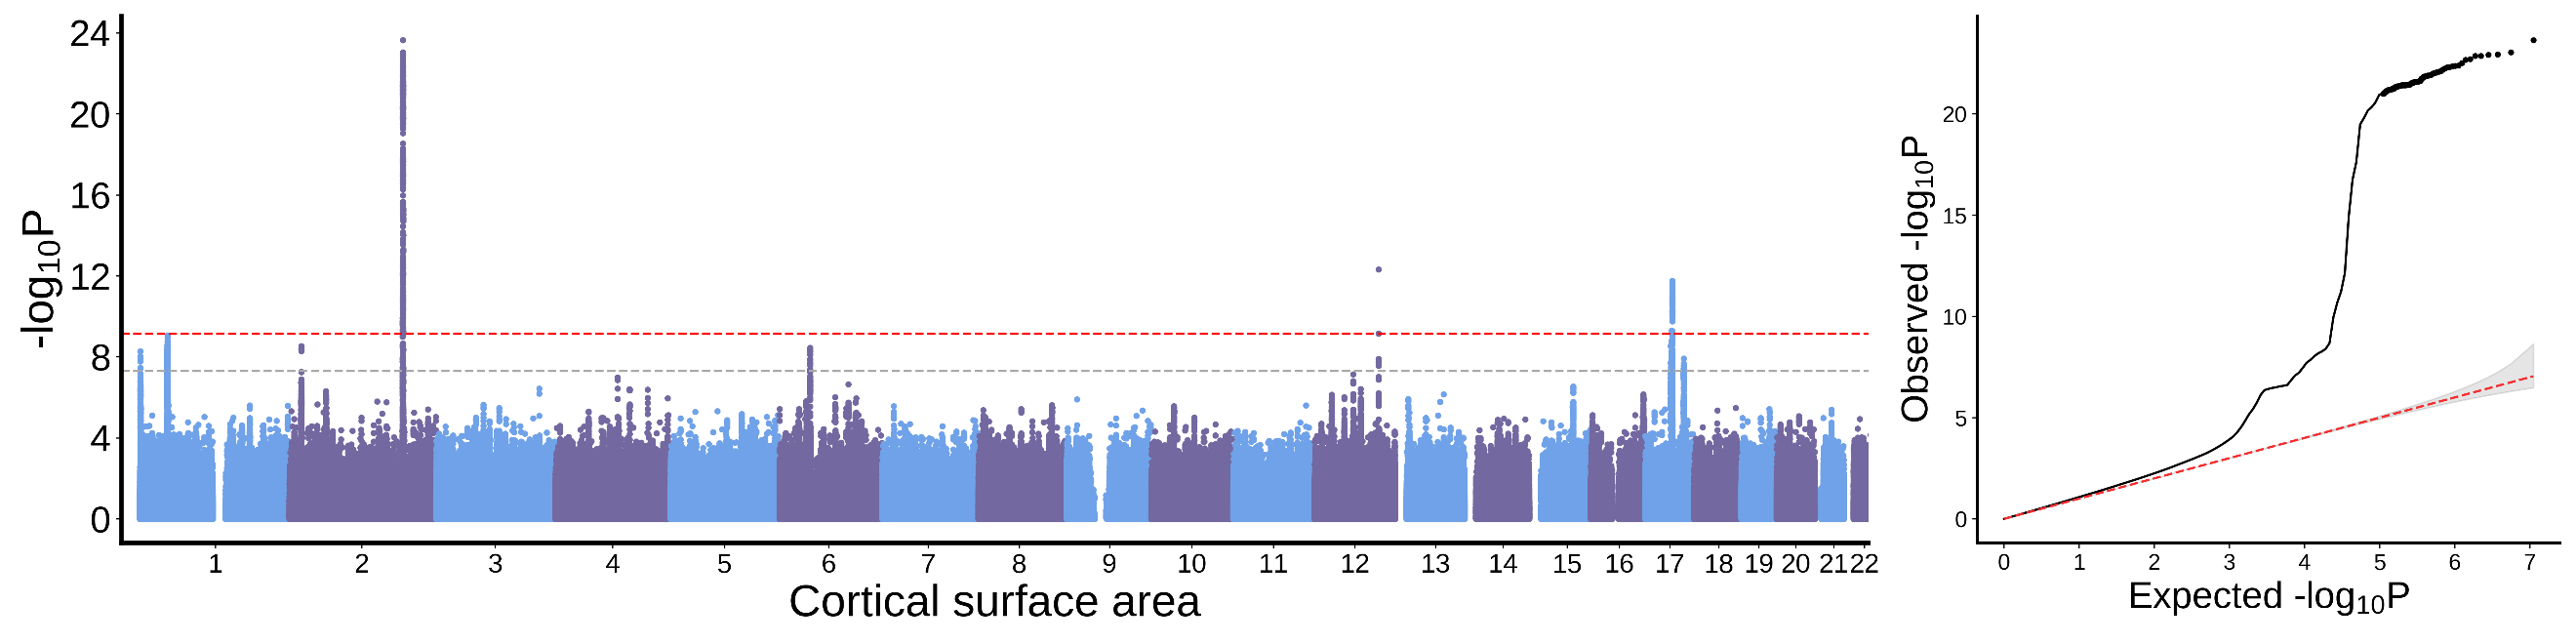


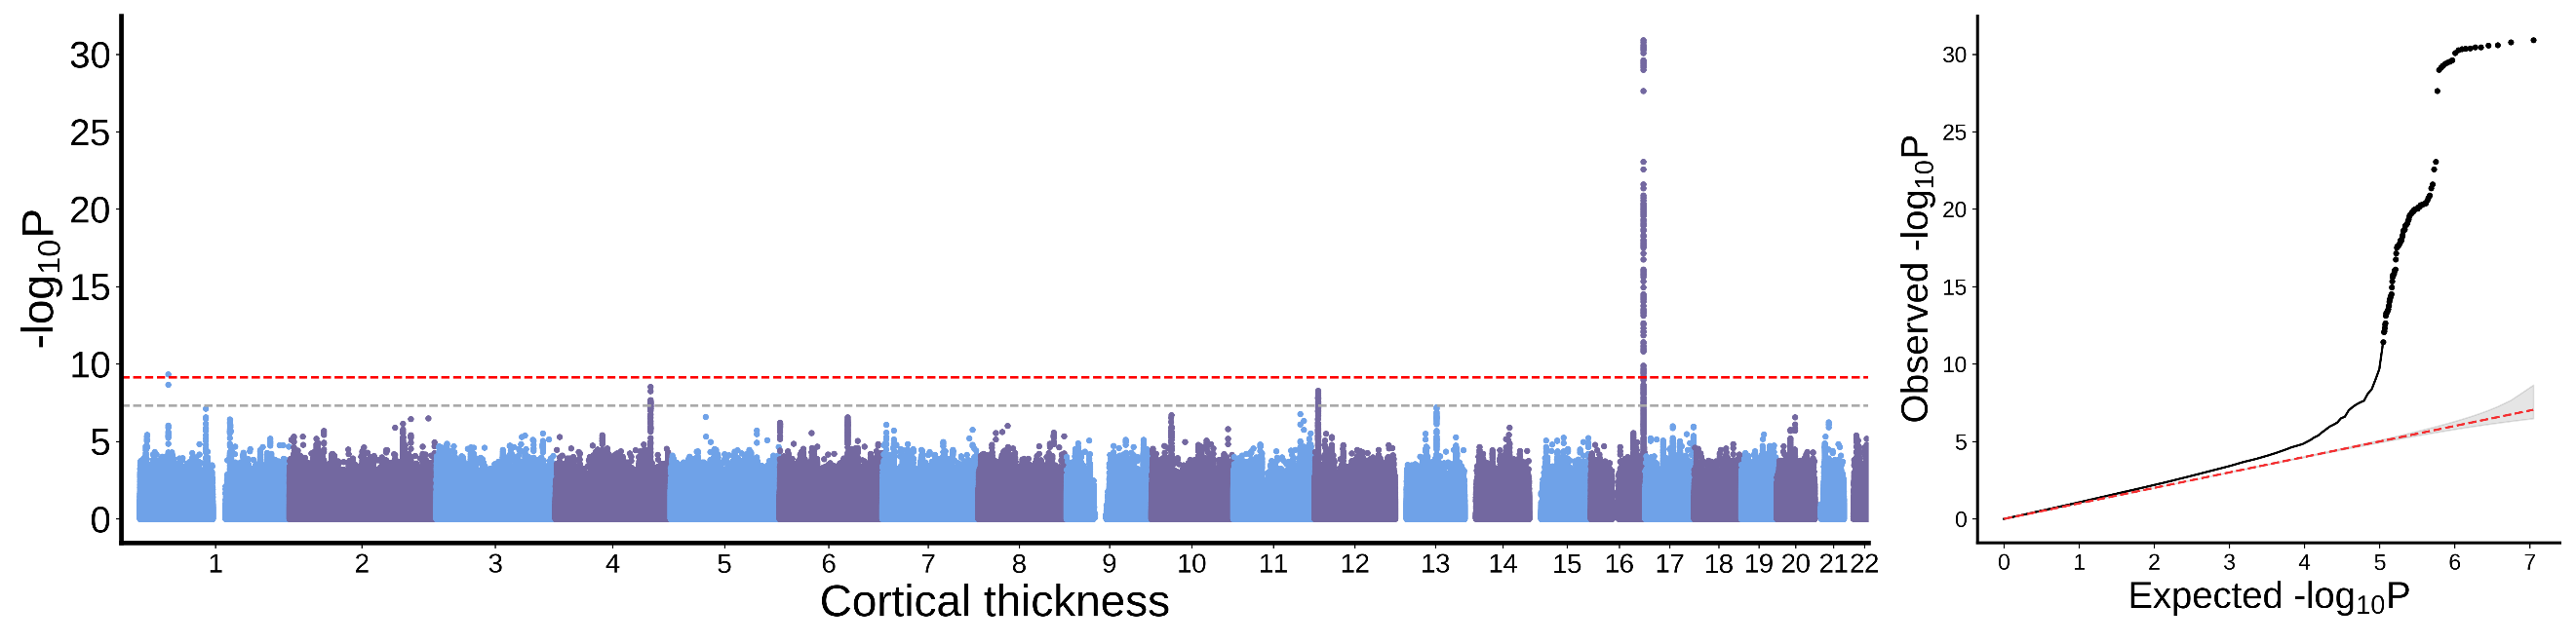


Medial orbitofrontal cortex


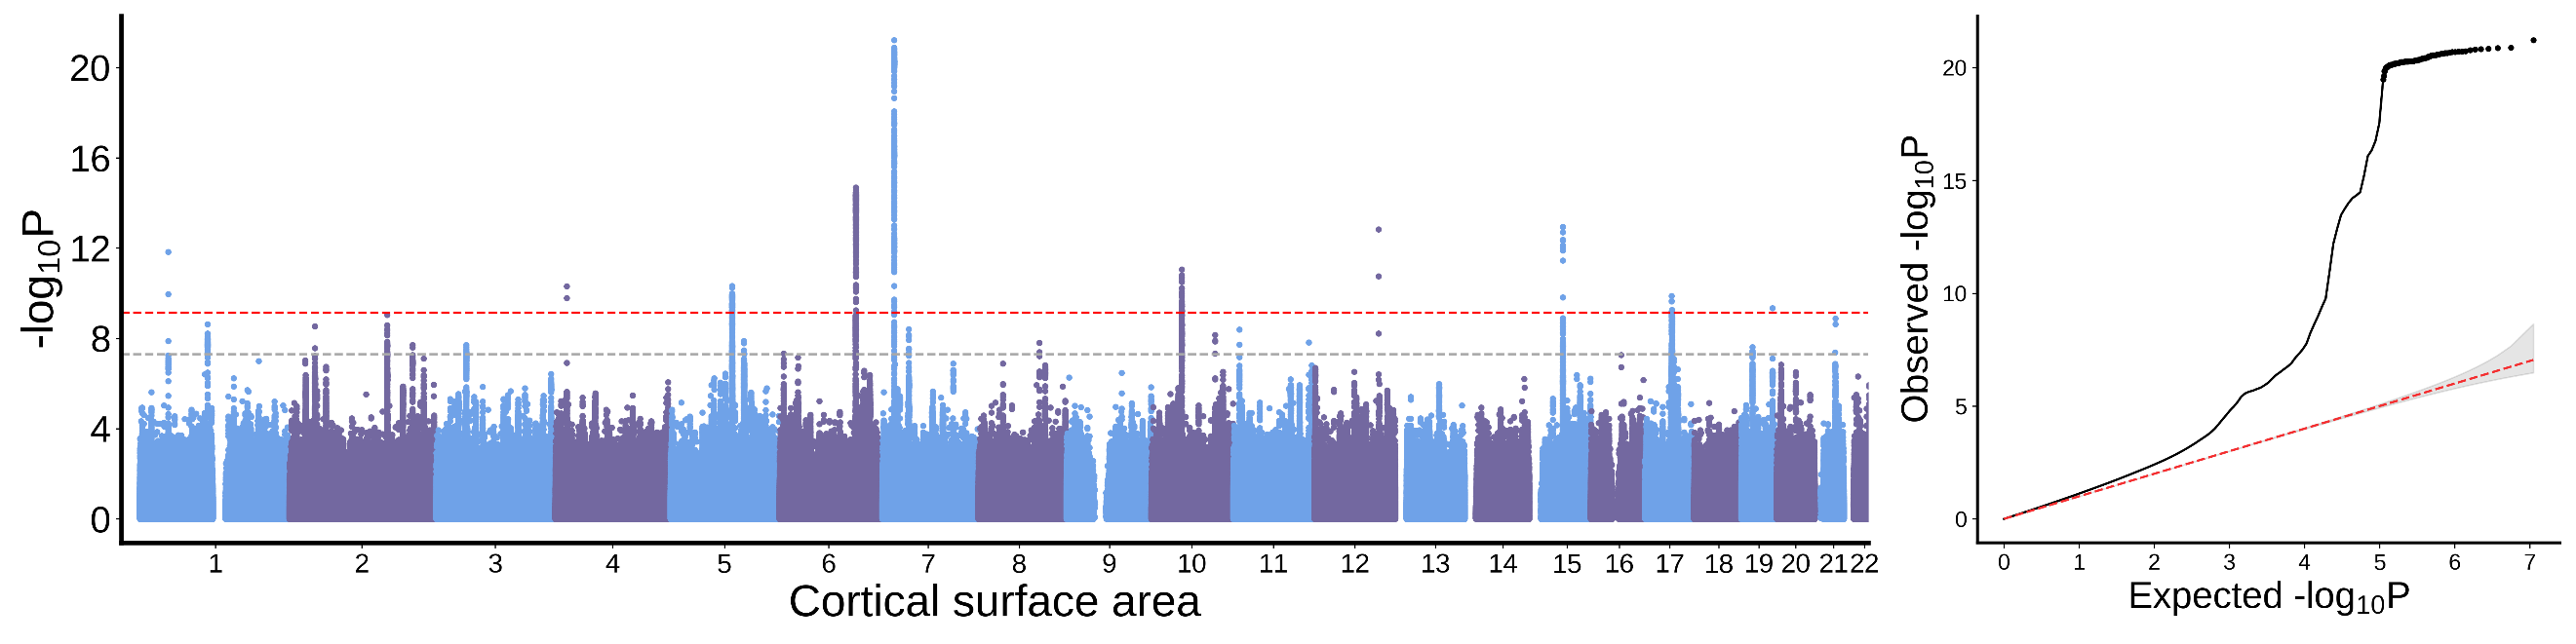


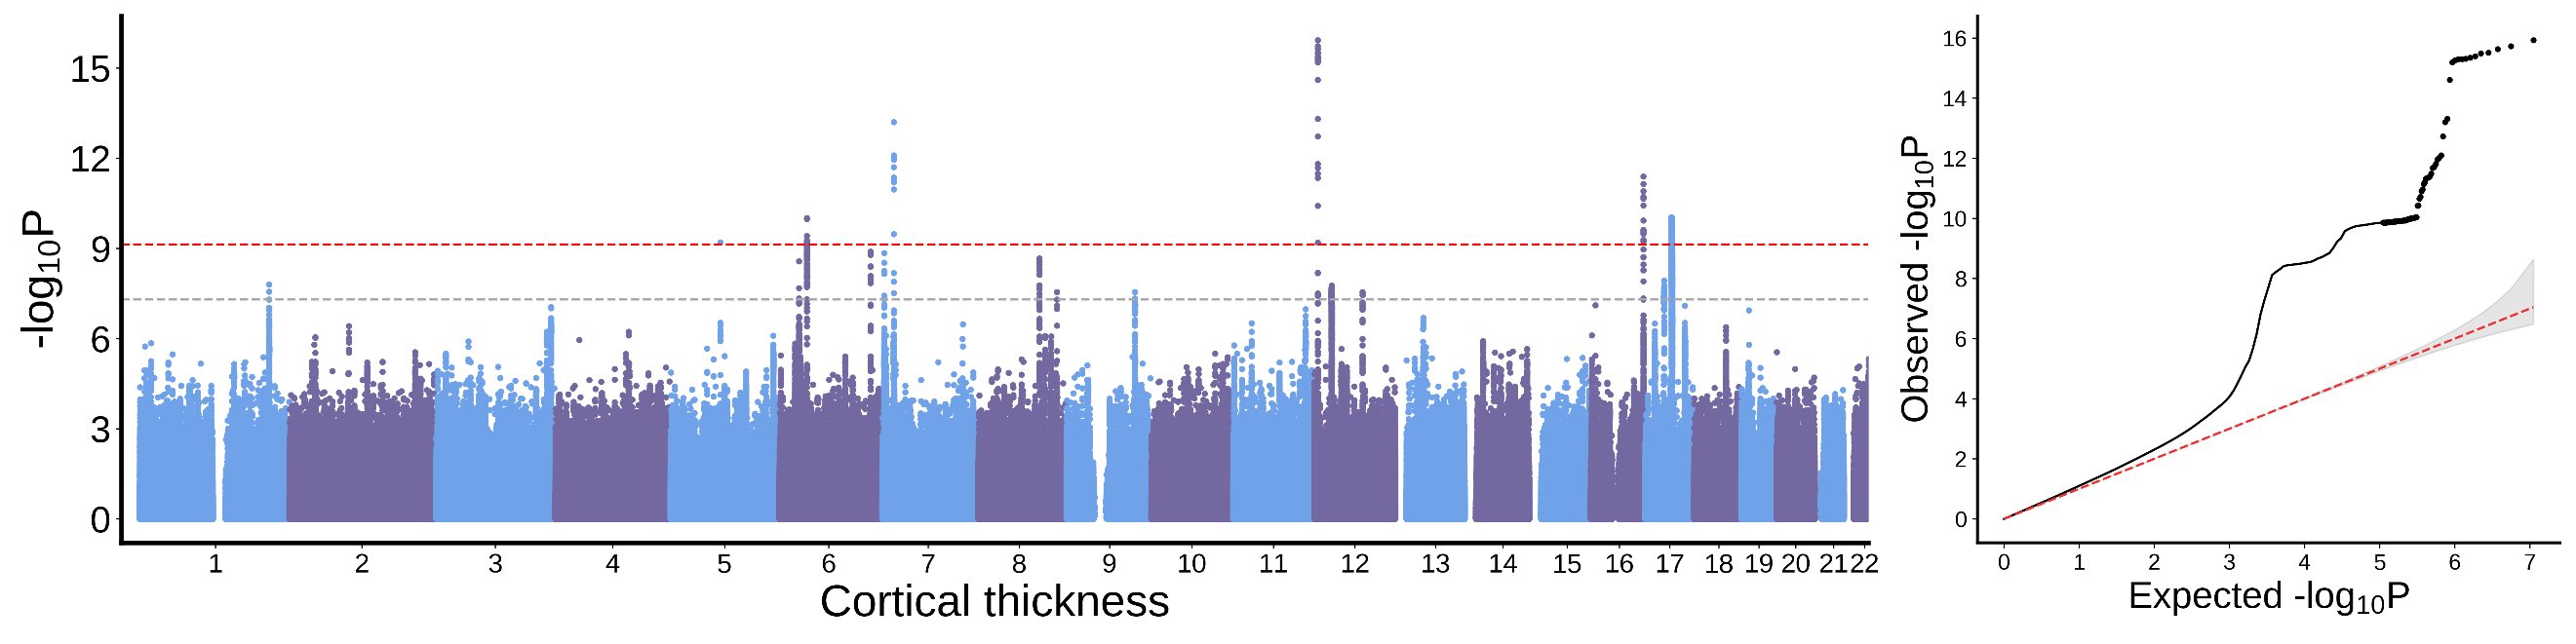


Lateral orbitofrontal cortex


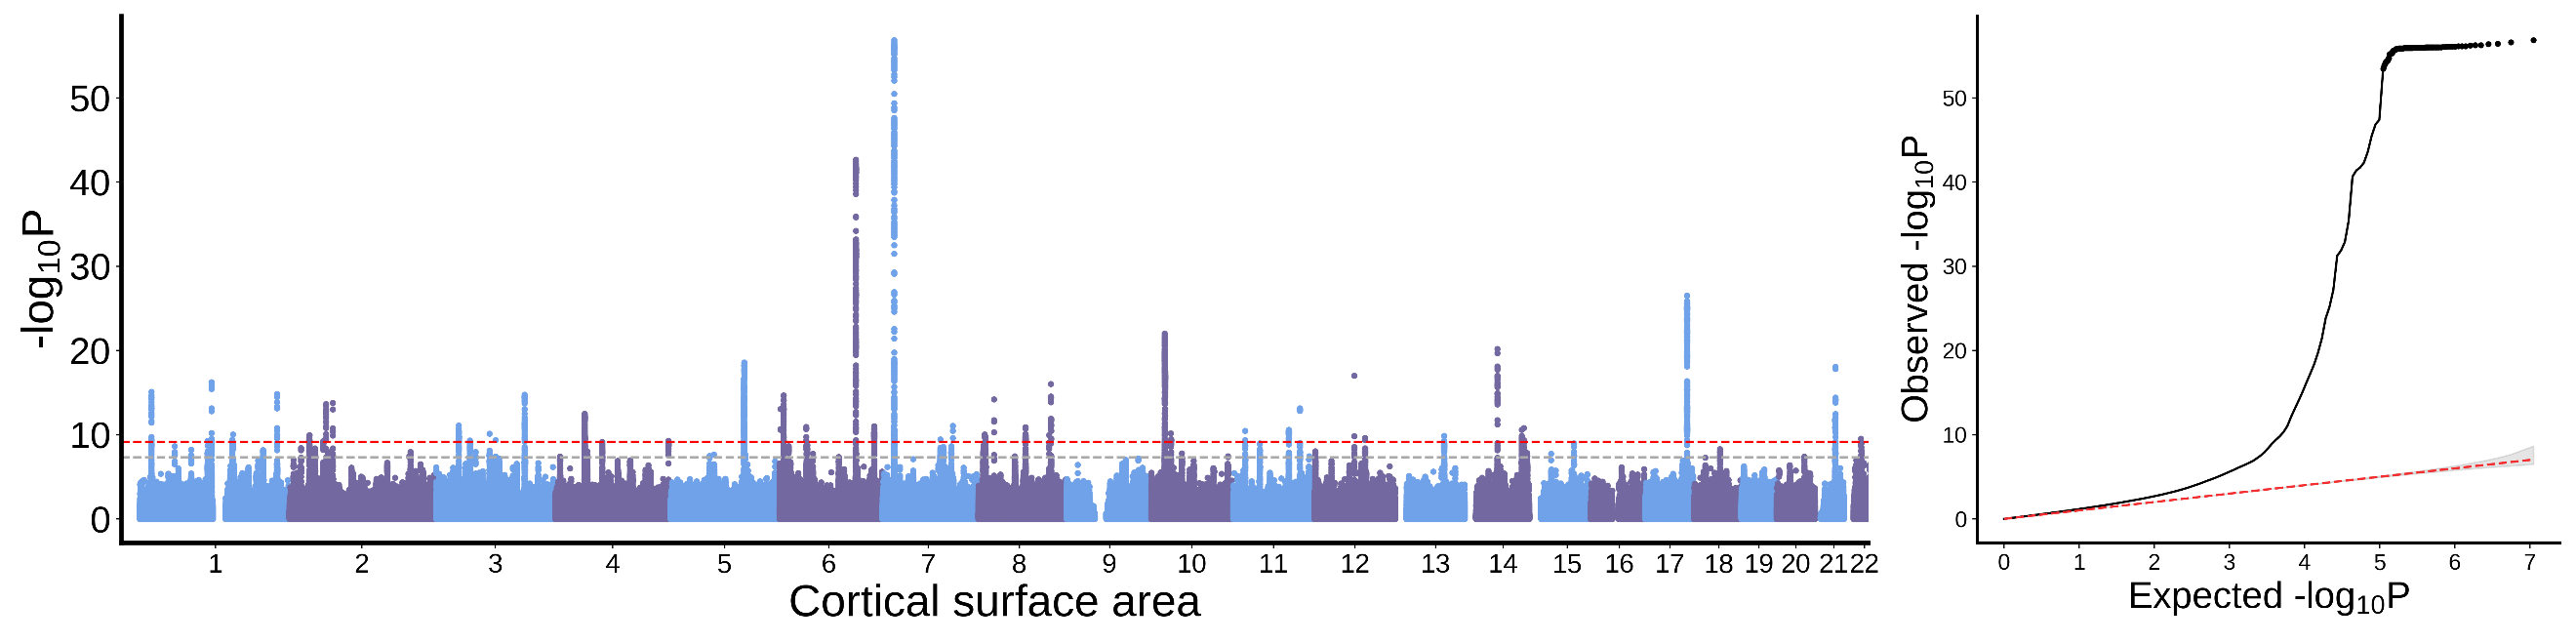


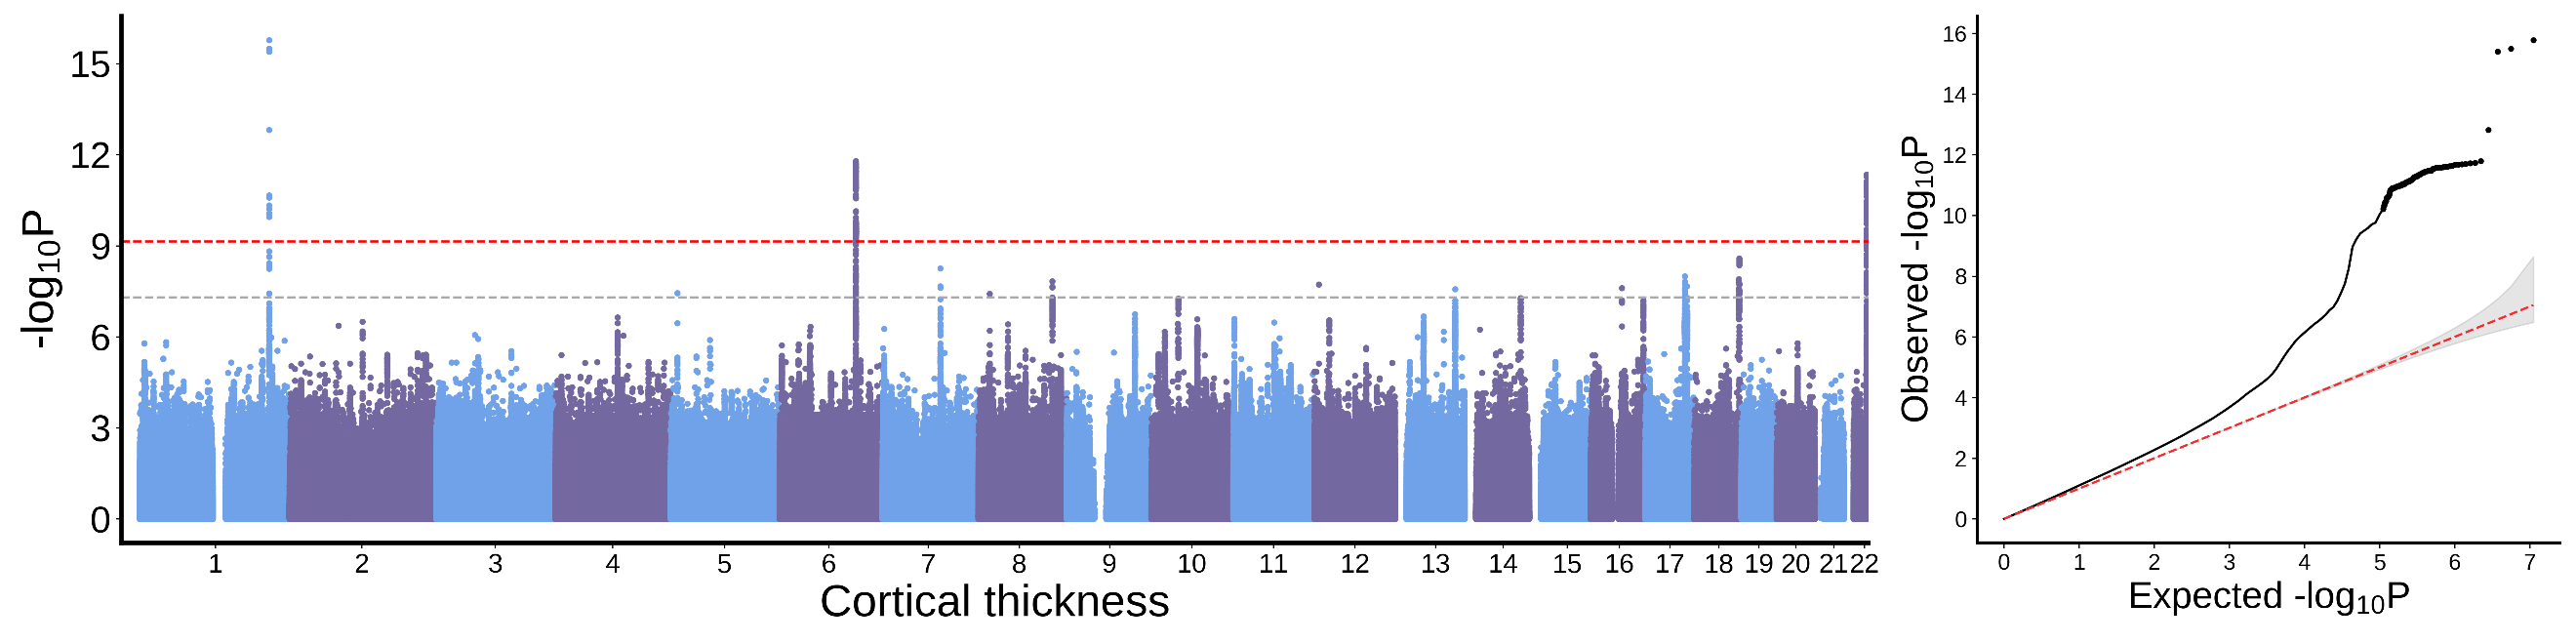


Rostral anterior cingulate cortex


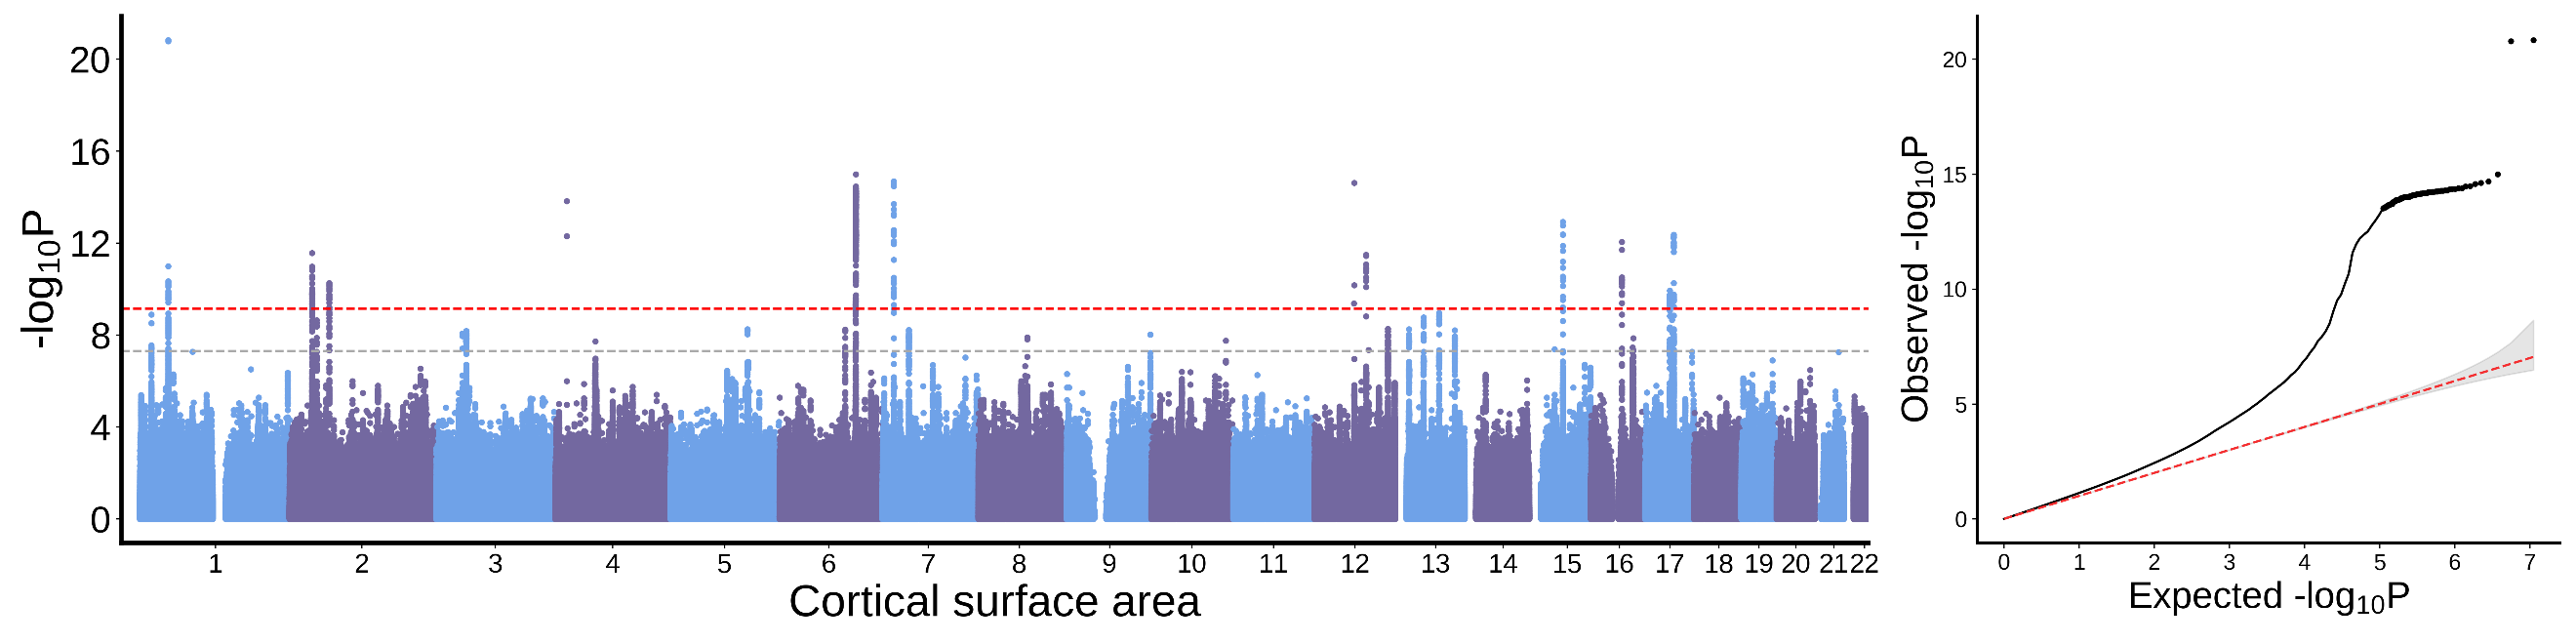


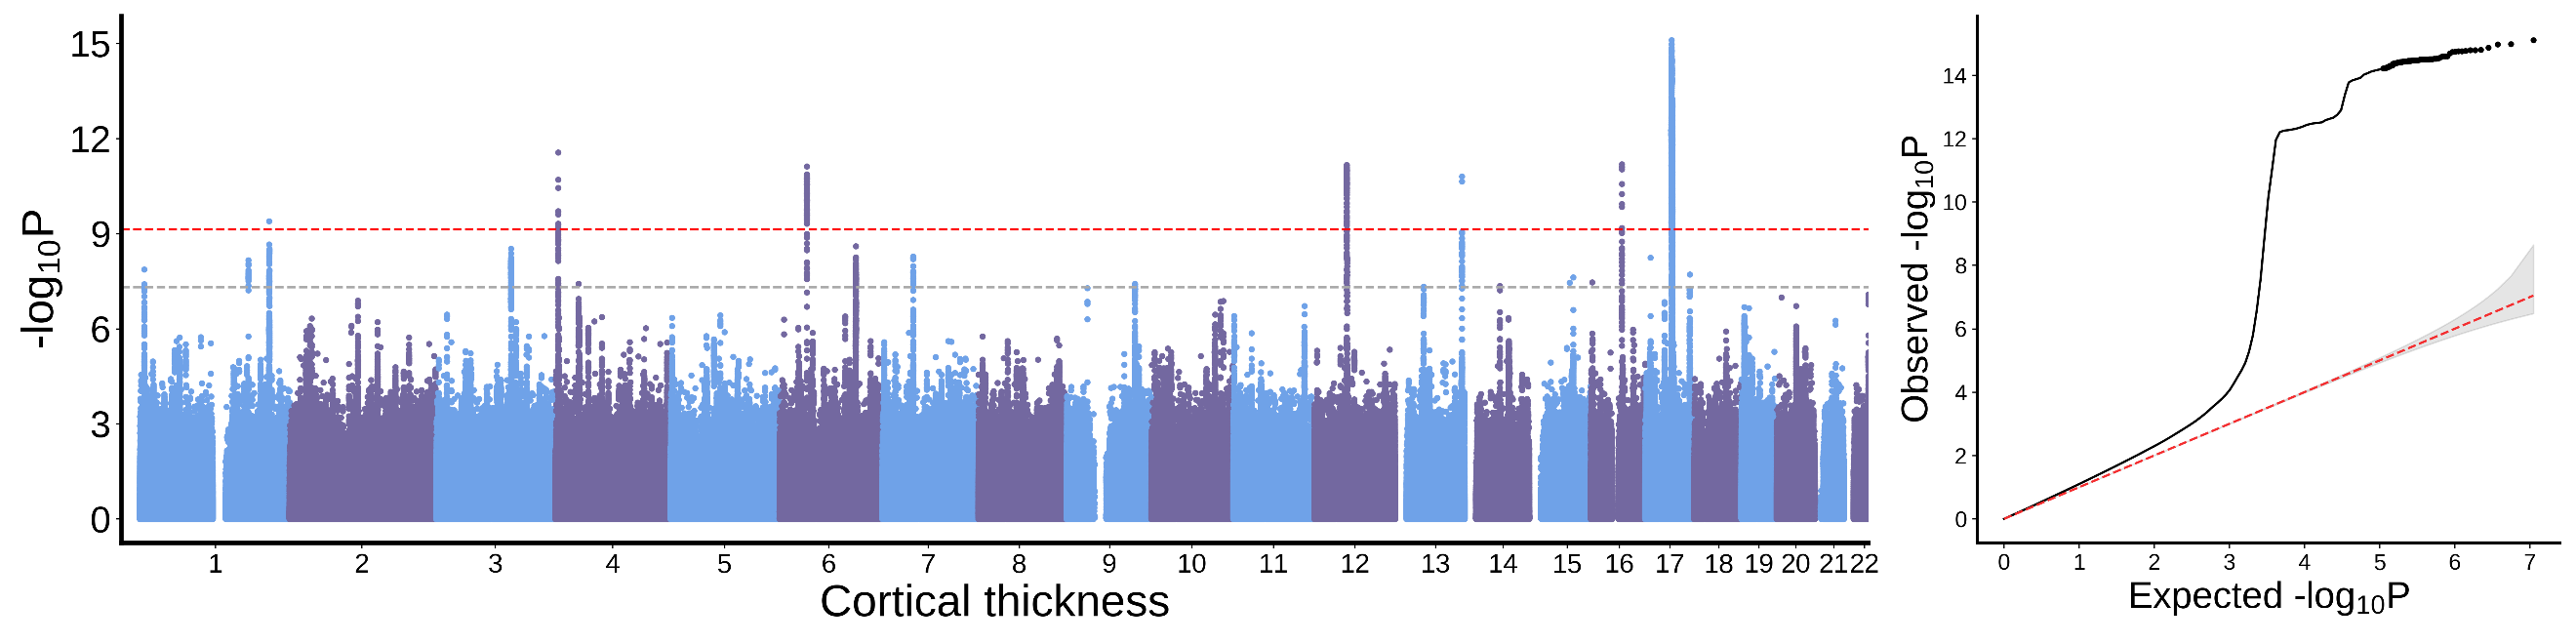


Caudal anterior cingulate cortex


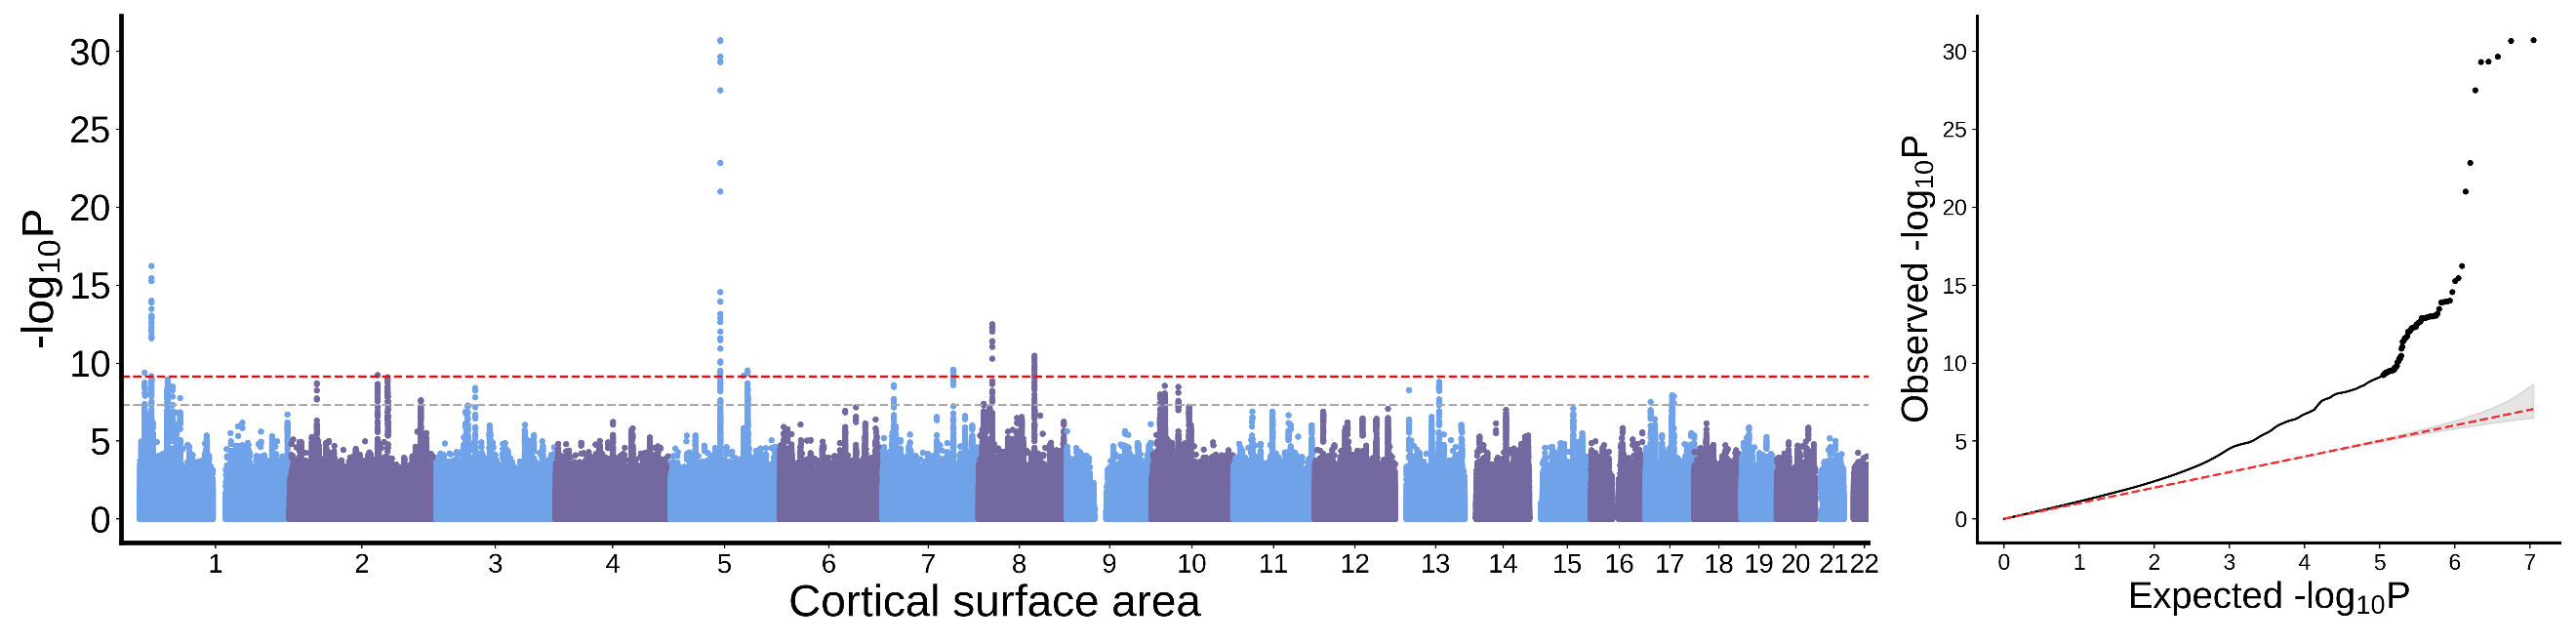


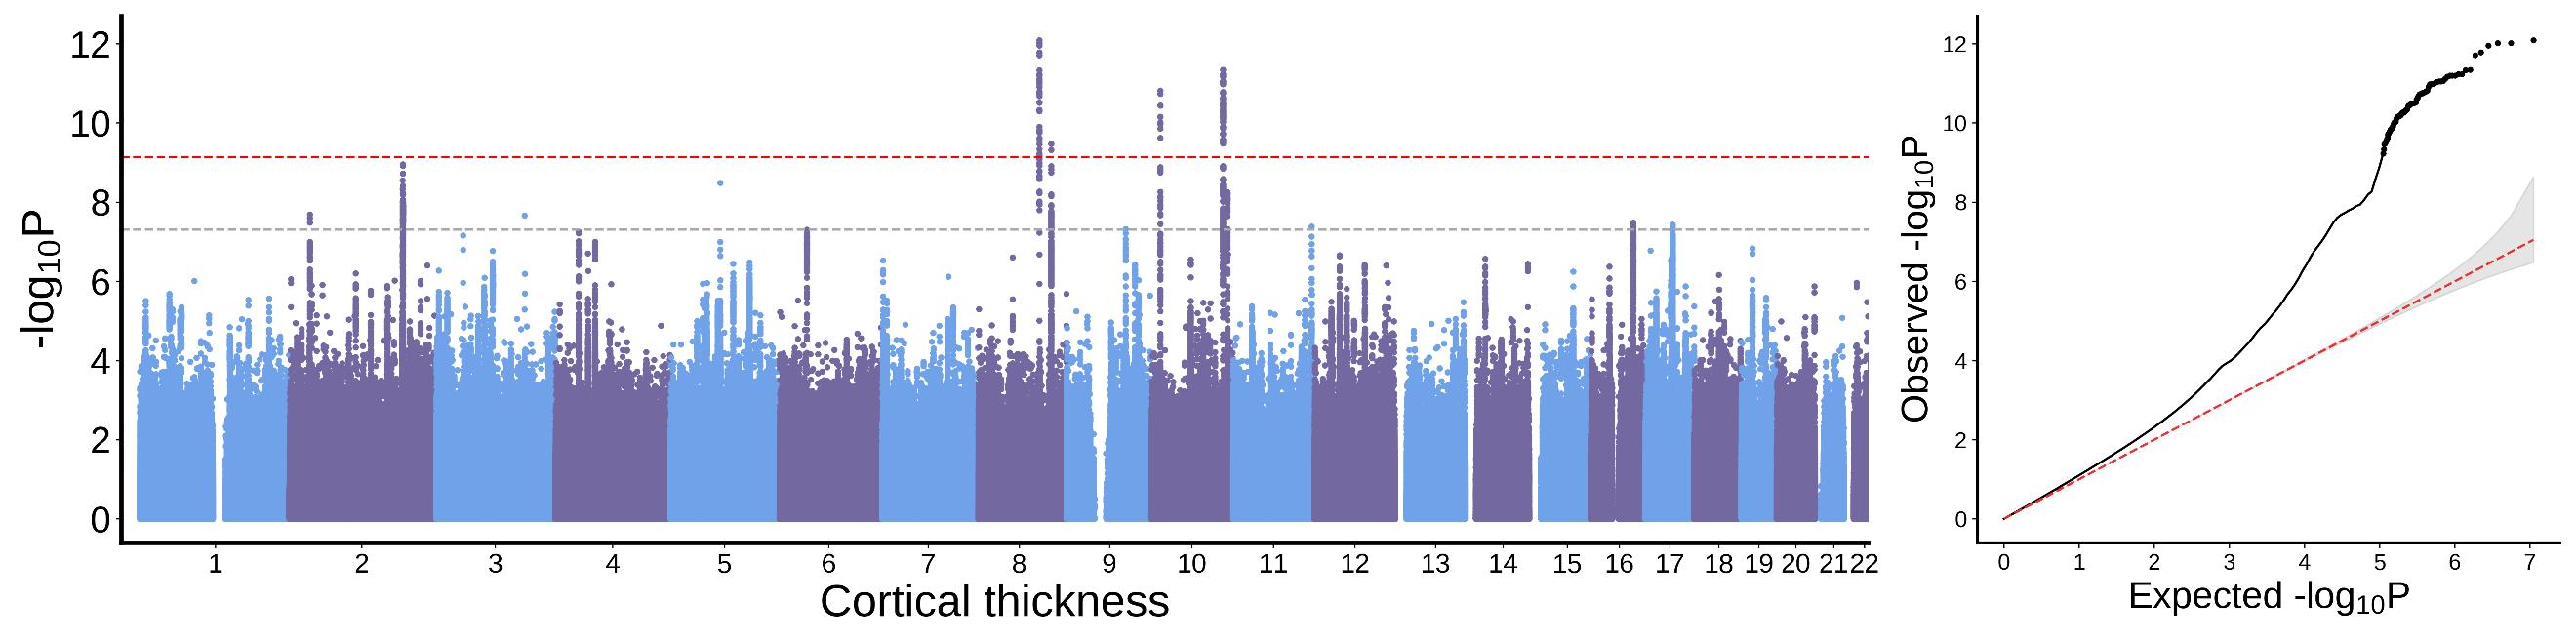


Superior frontal cortex


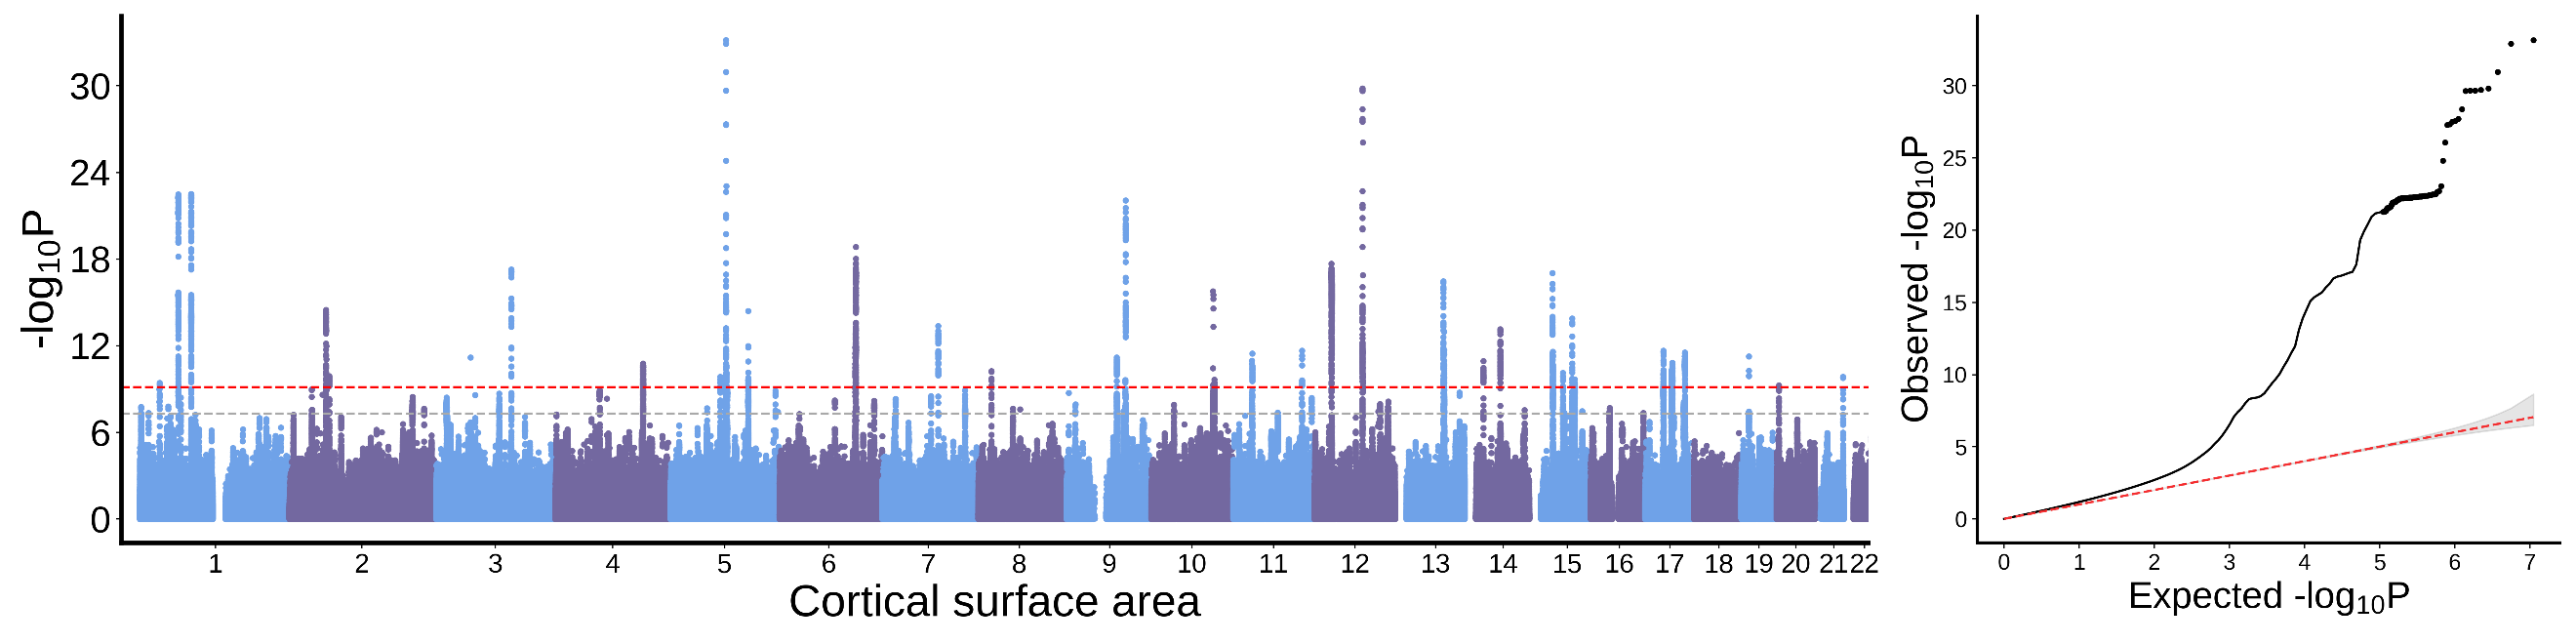


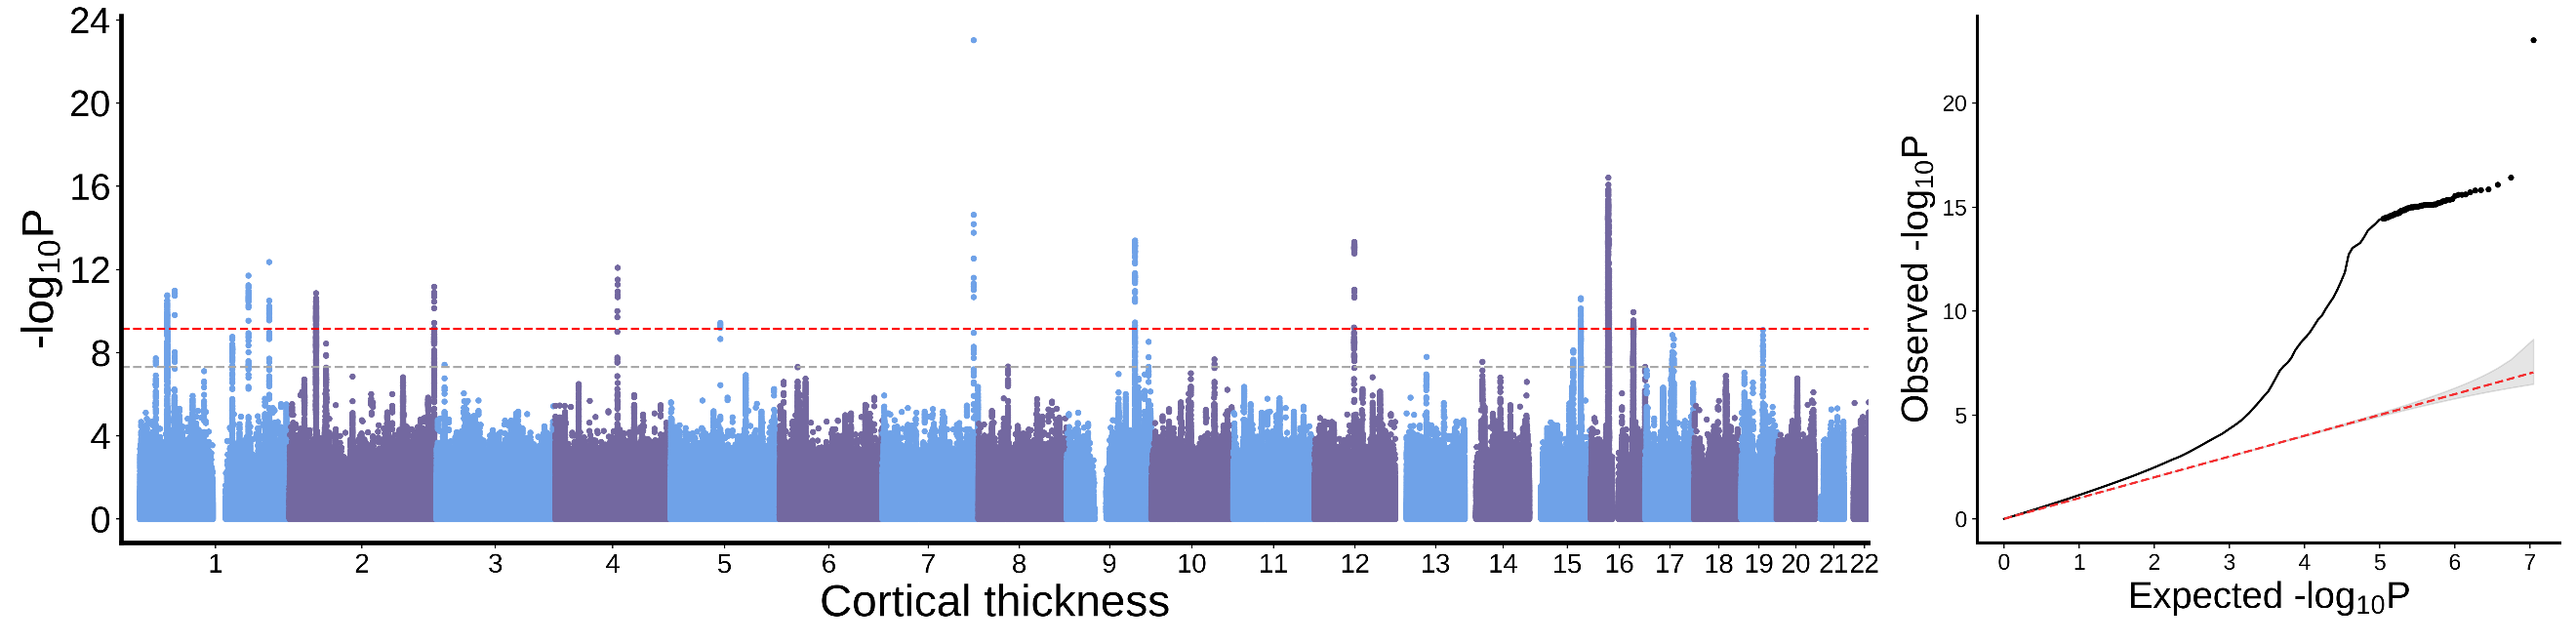


Rostral middle frontal cortex


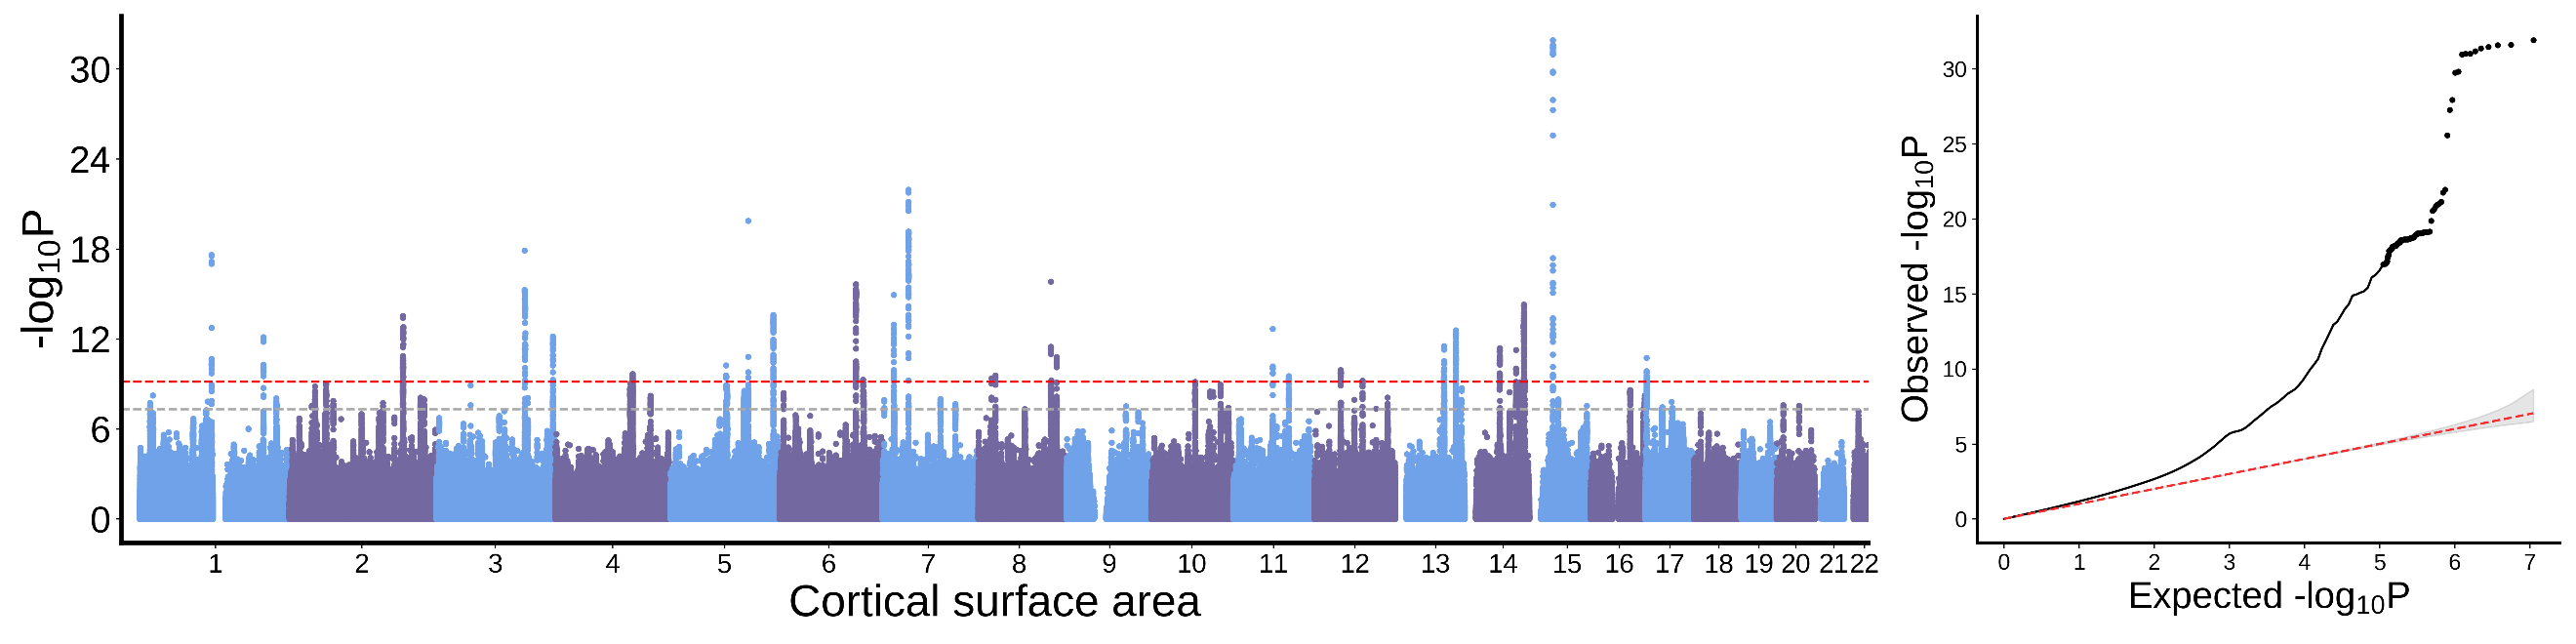


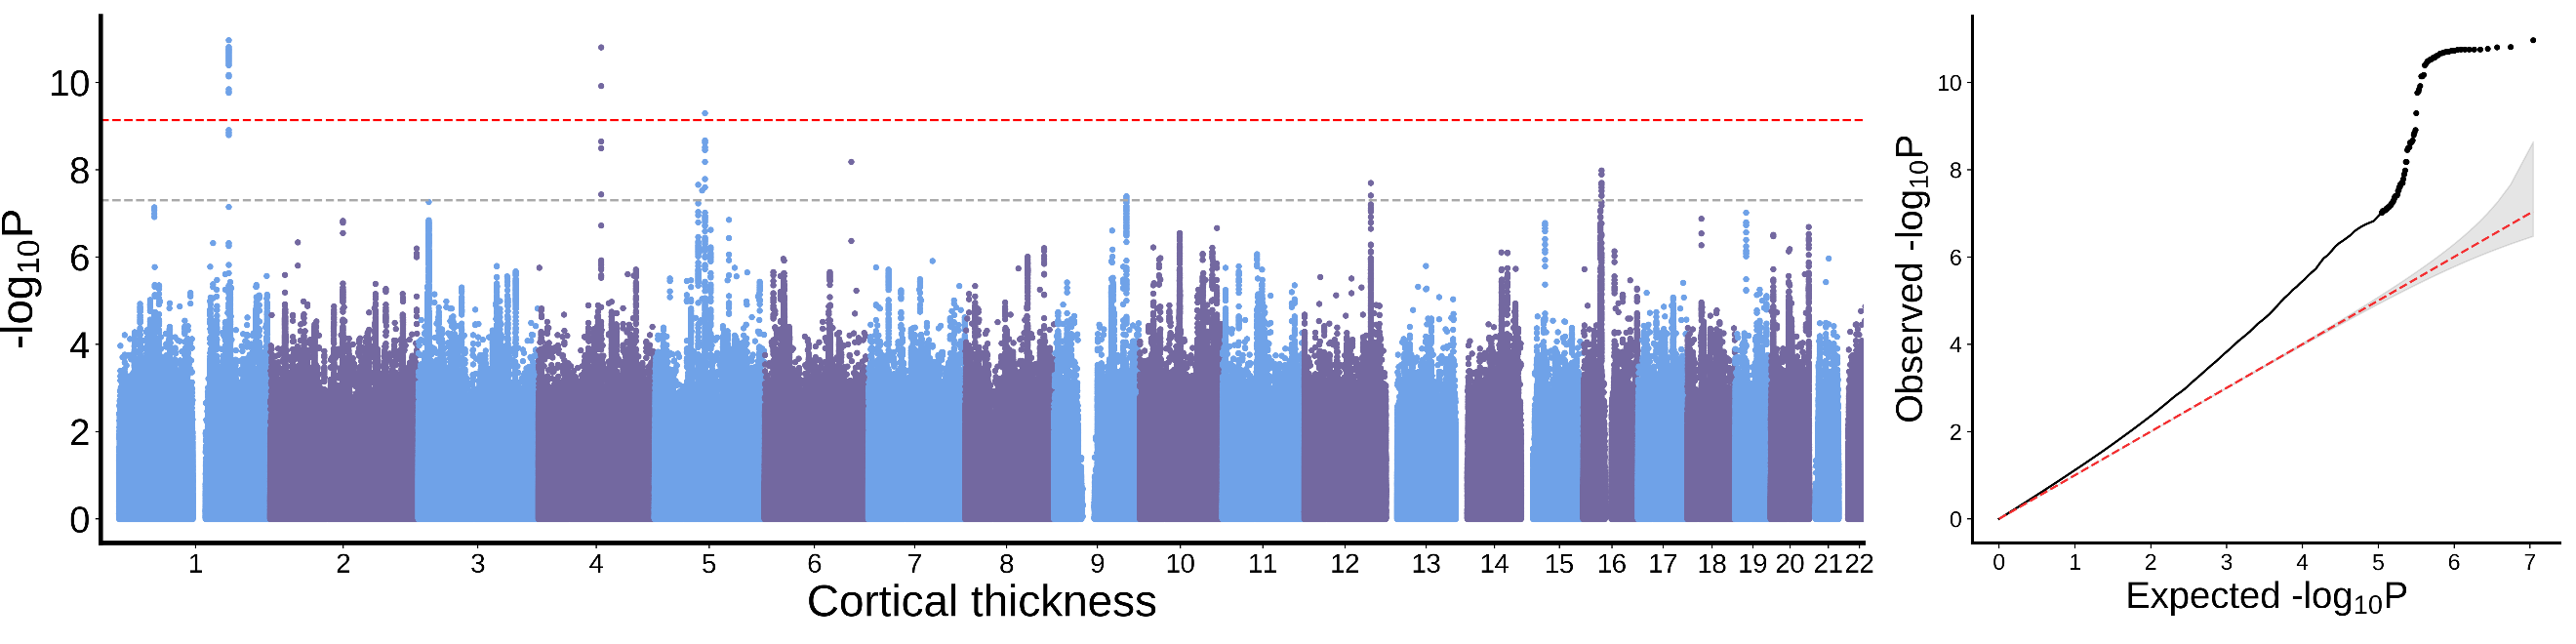


Pars orbitalis


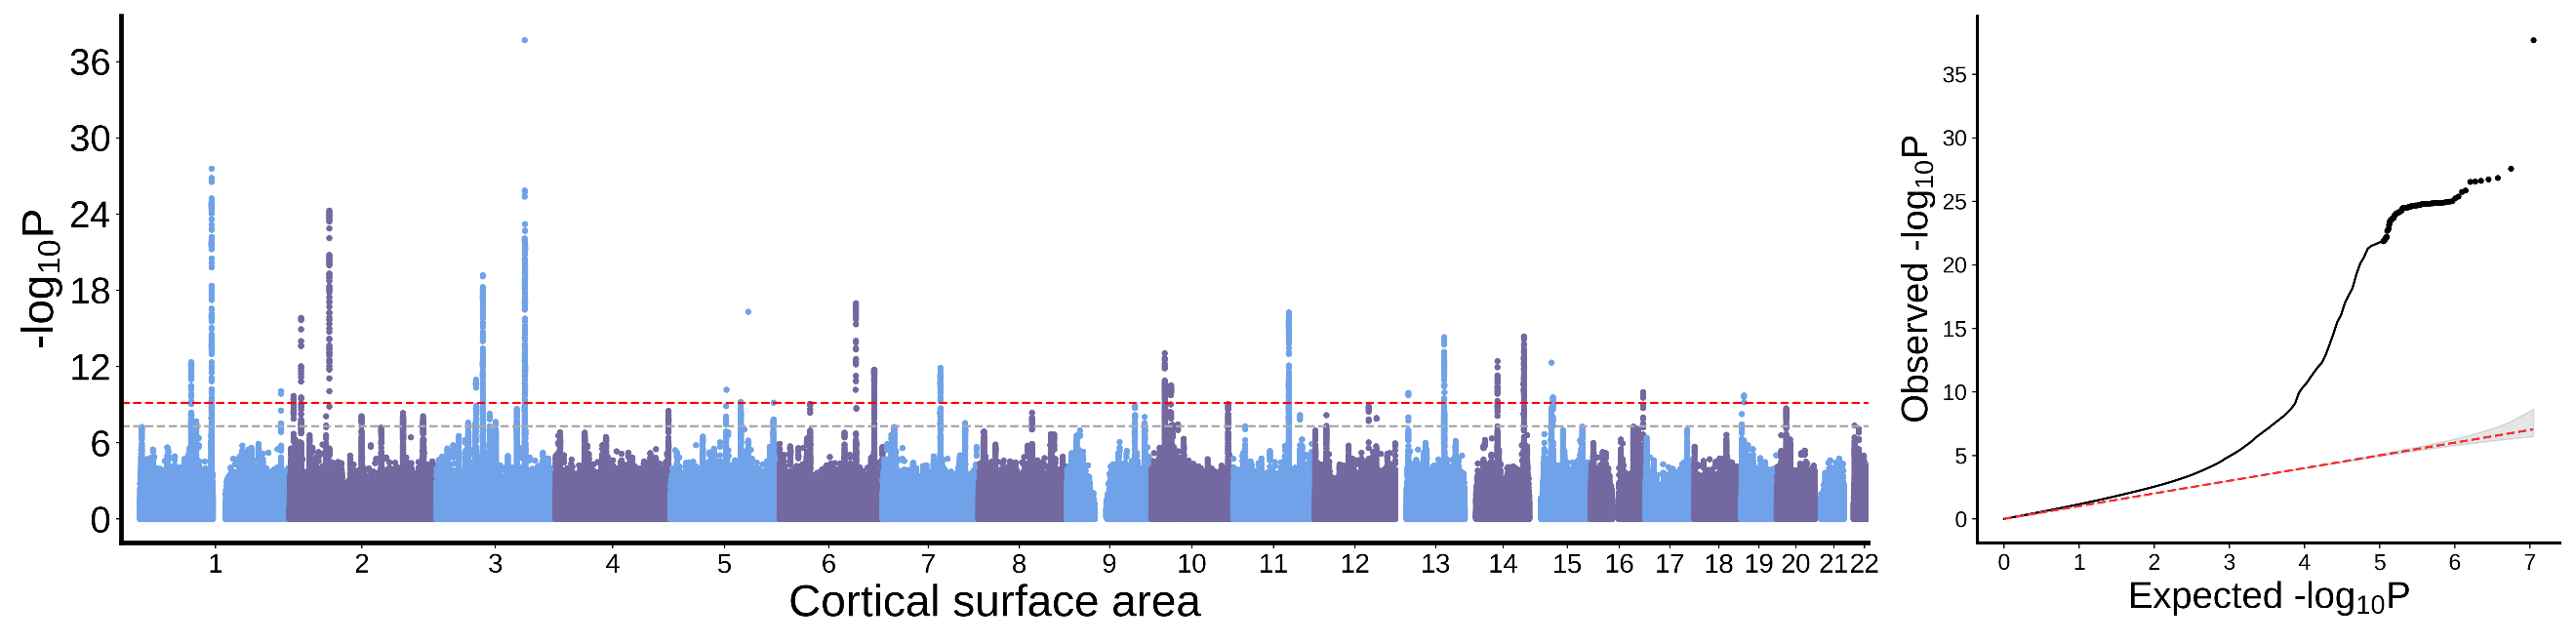


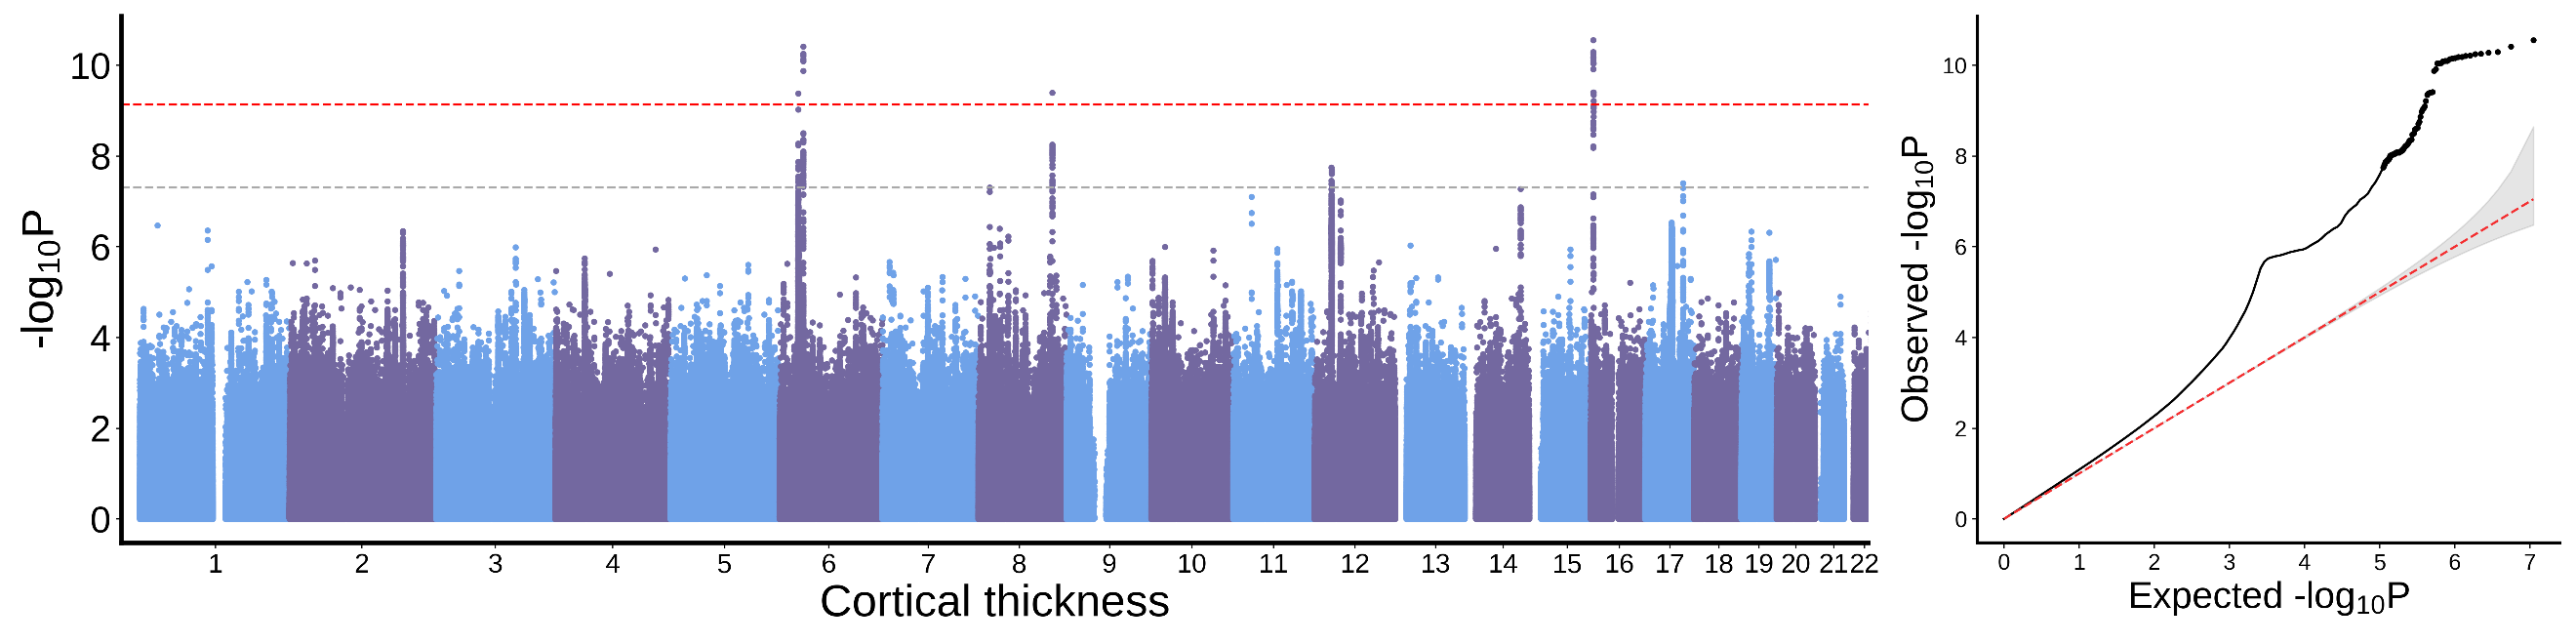


Pars triangularis


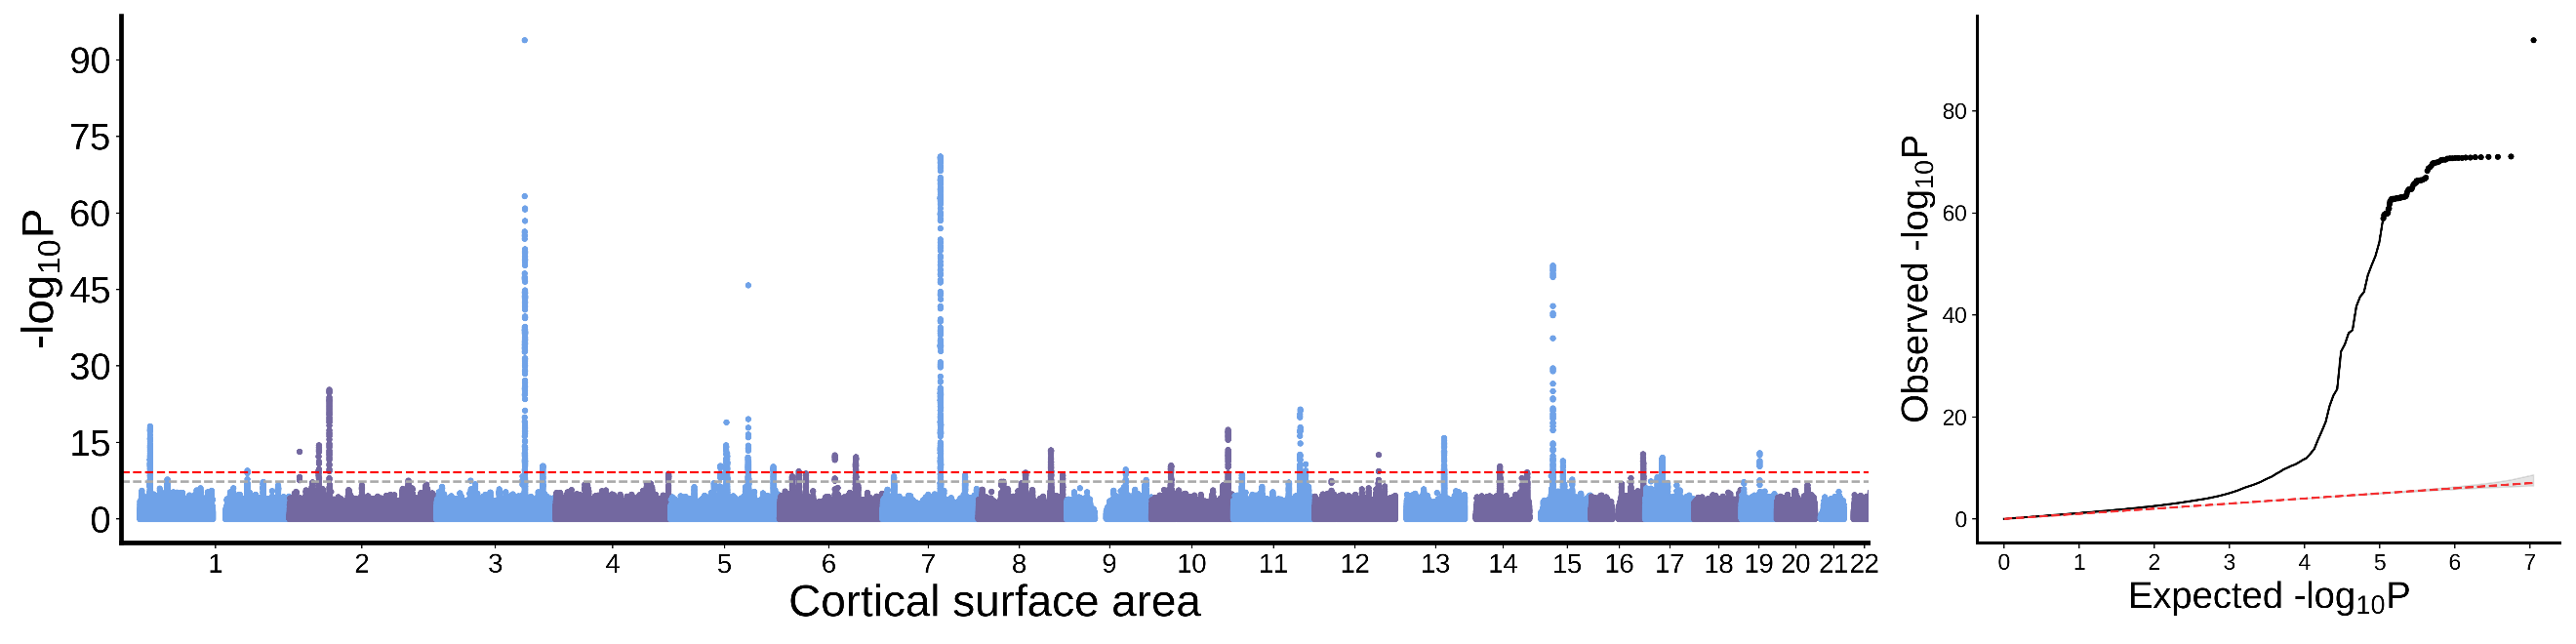


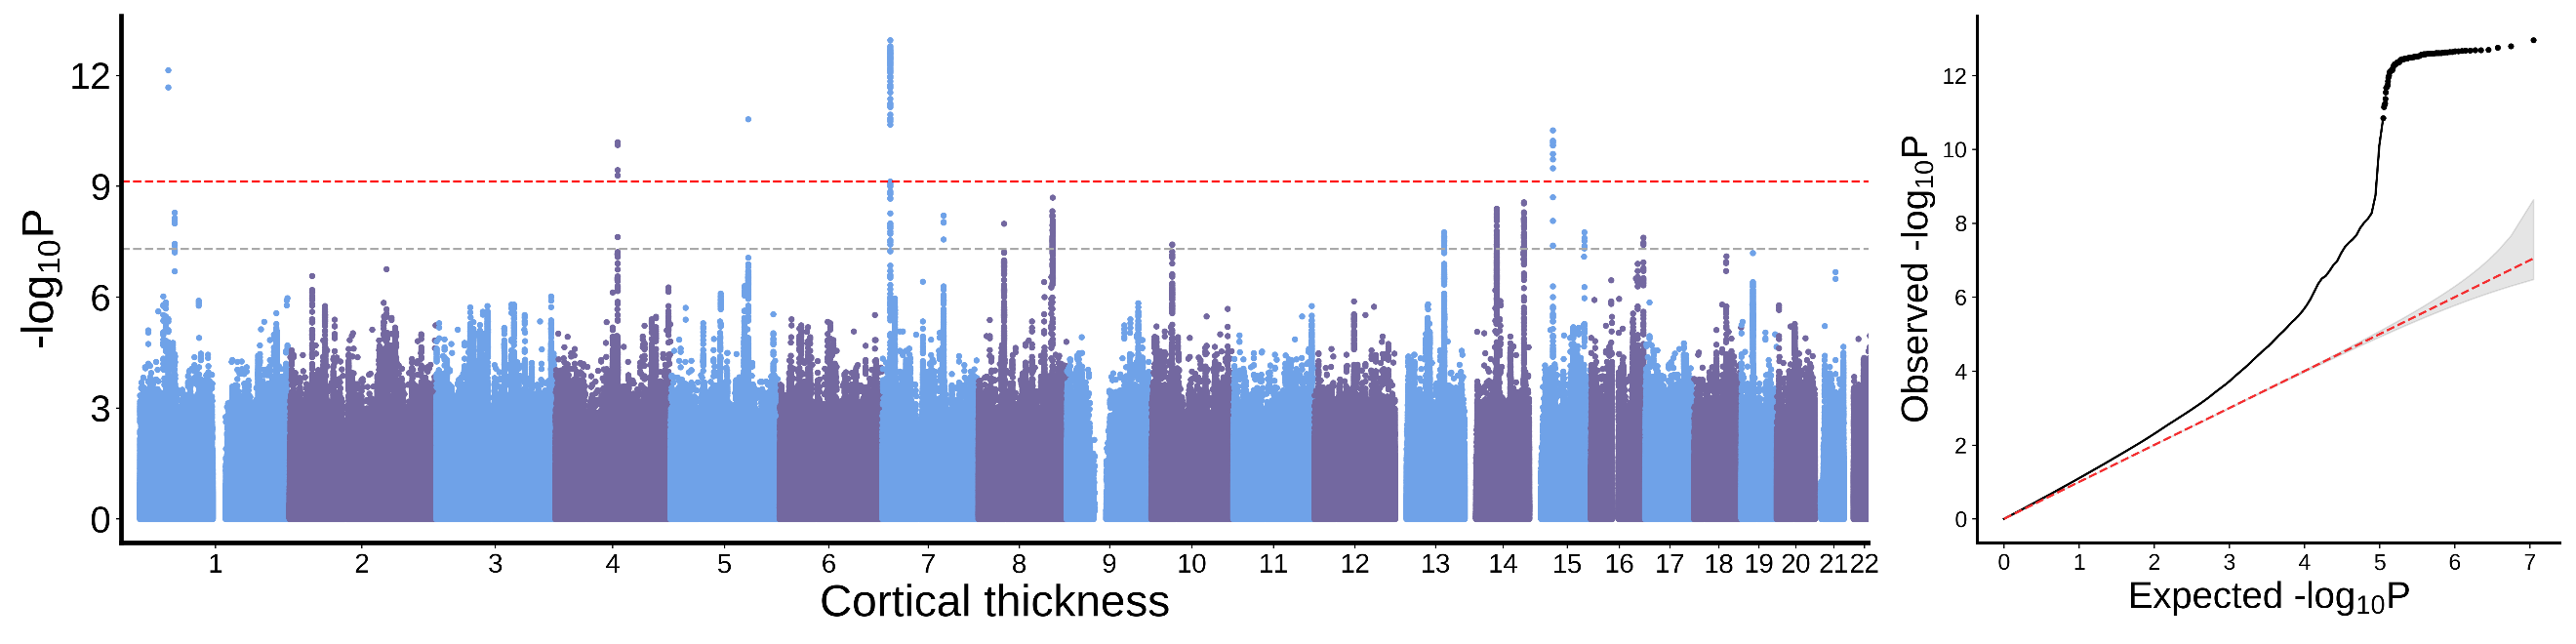


Pars opercularis


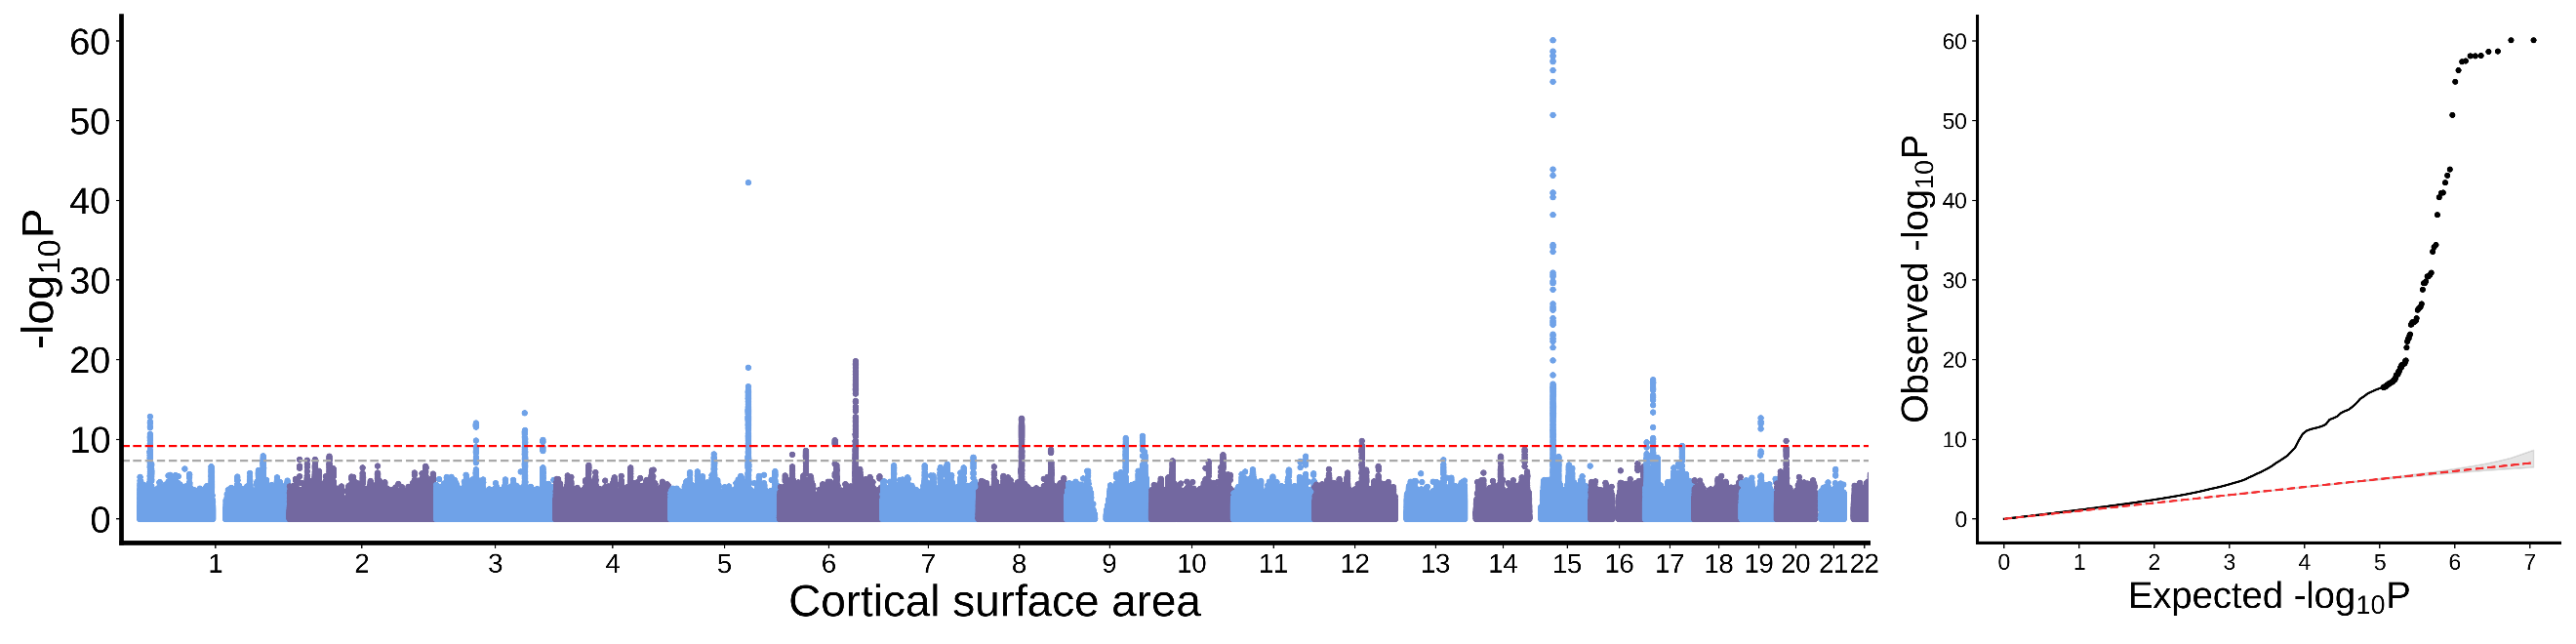


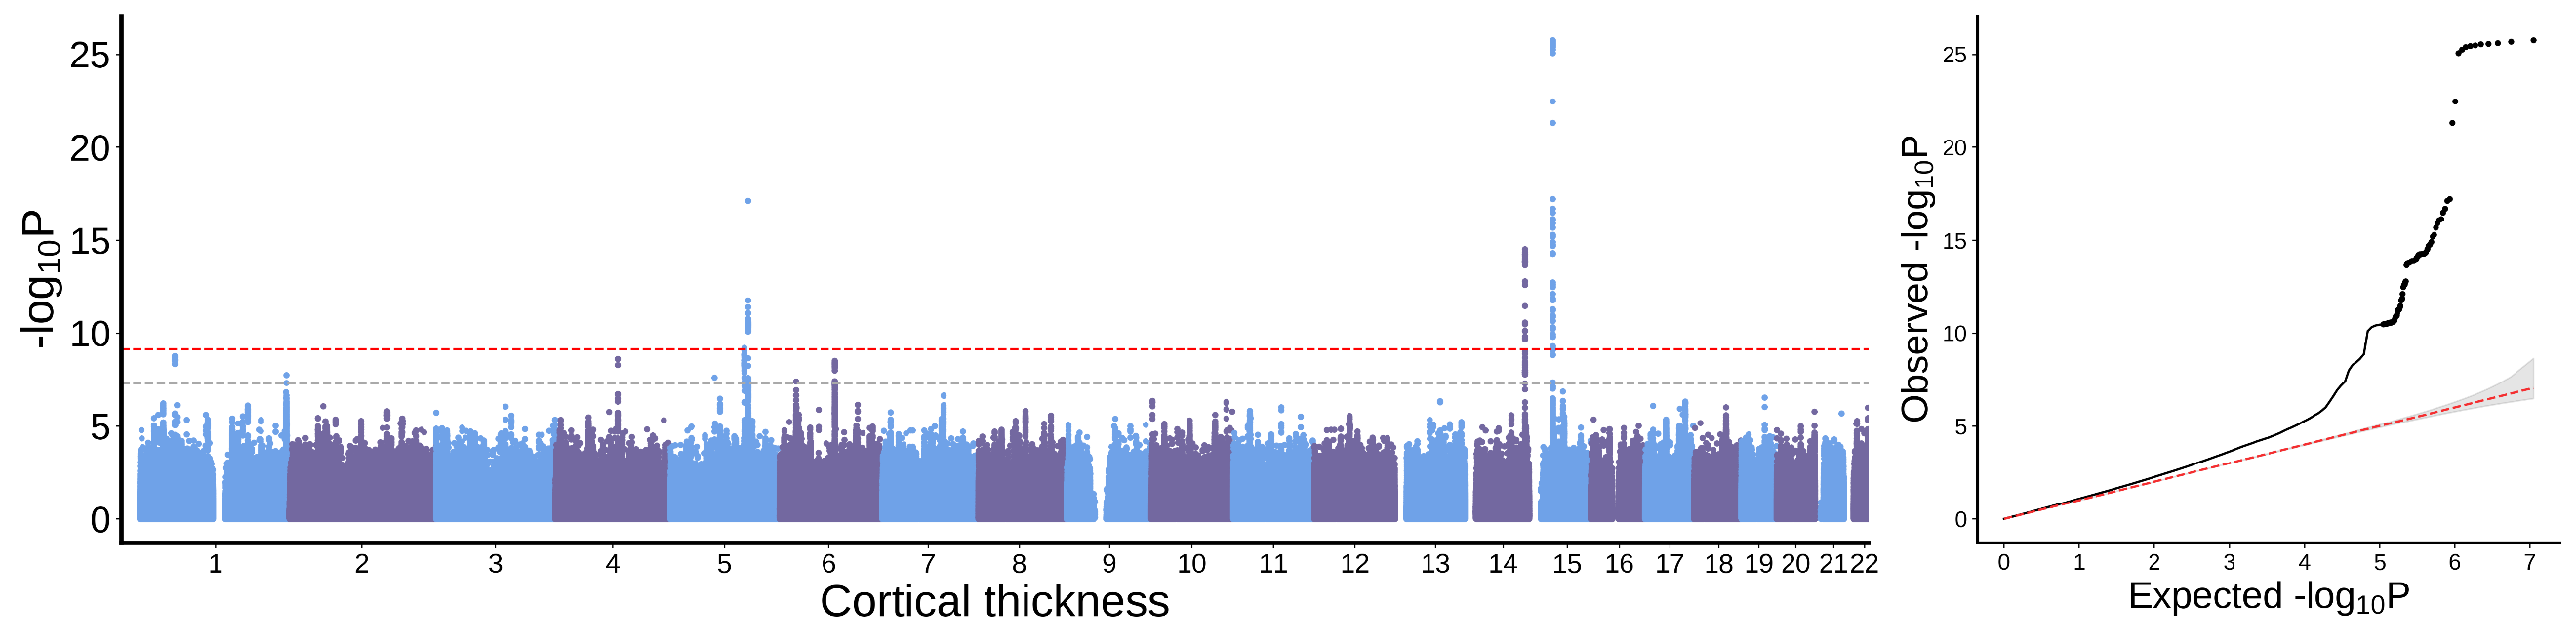


Caudal middle frontal cortex


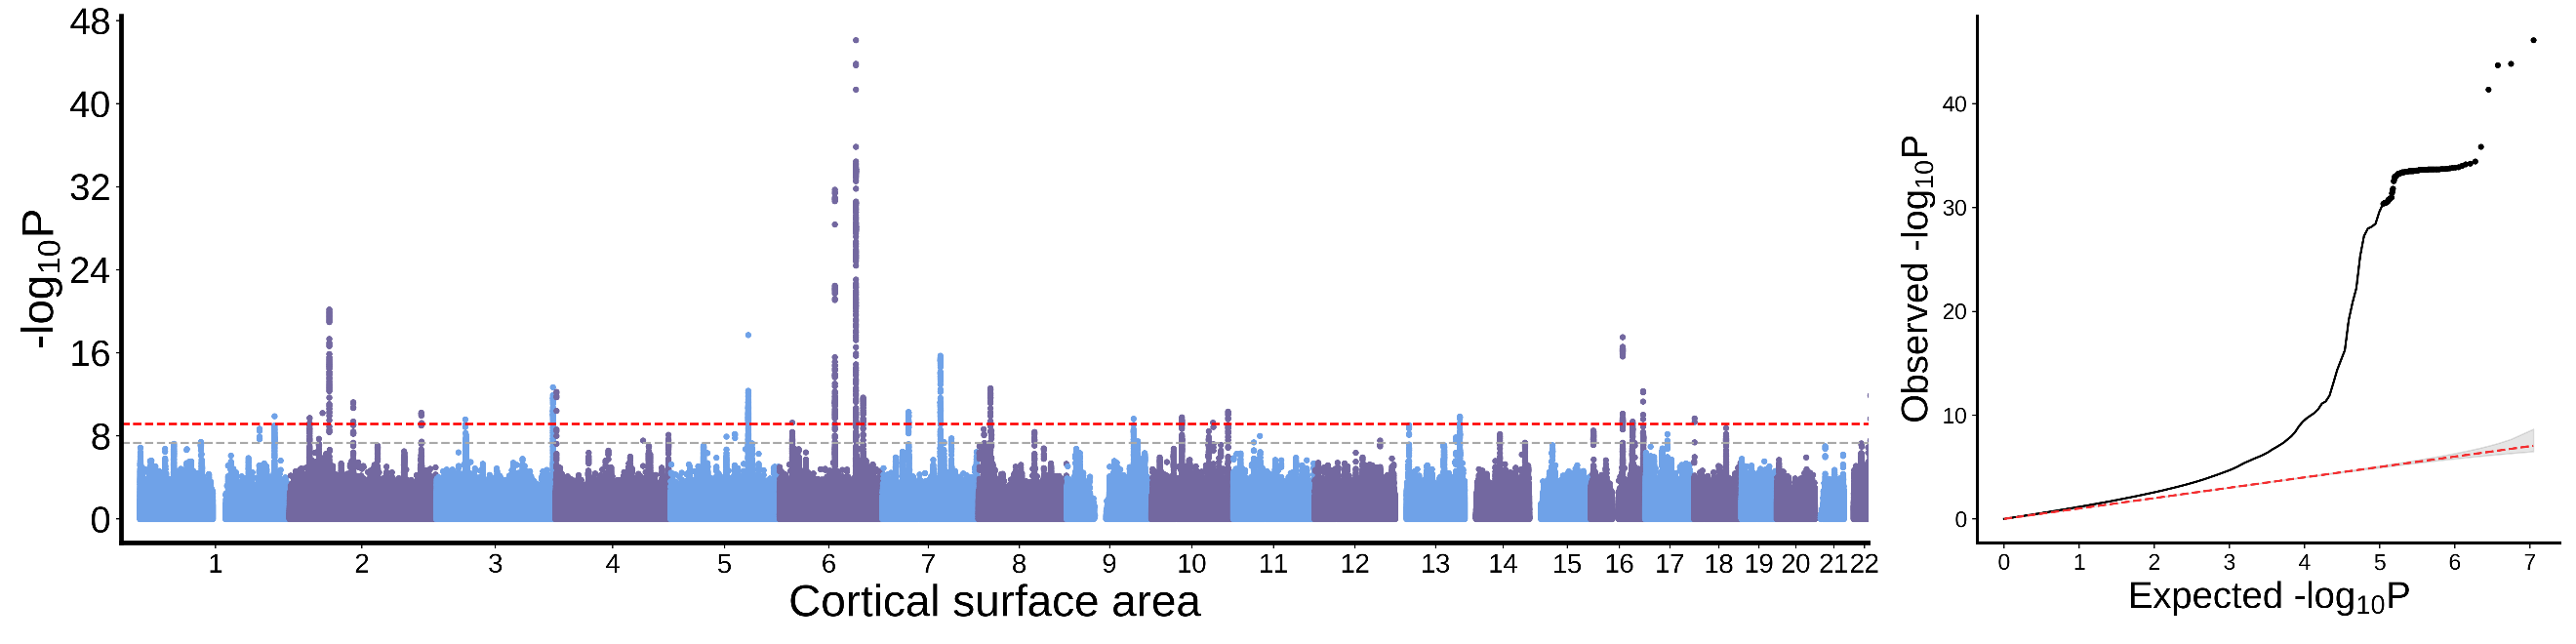


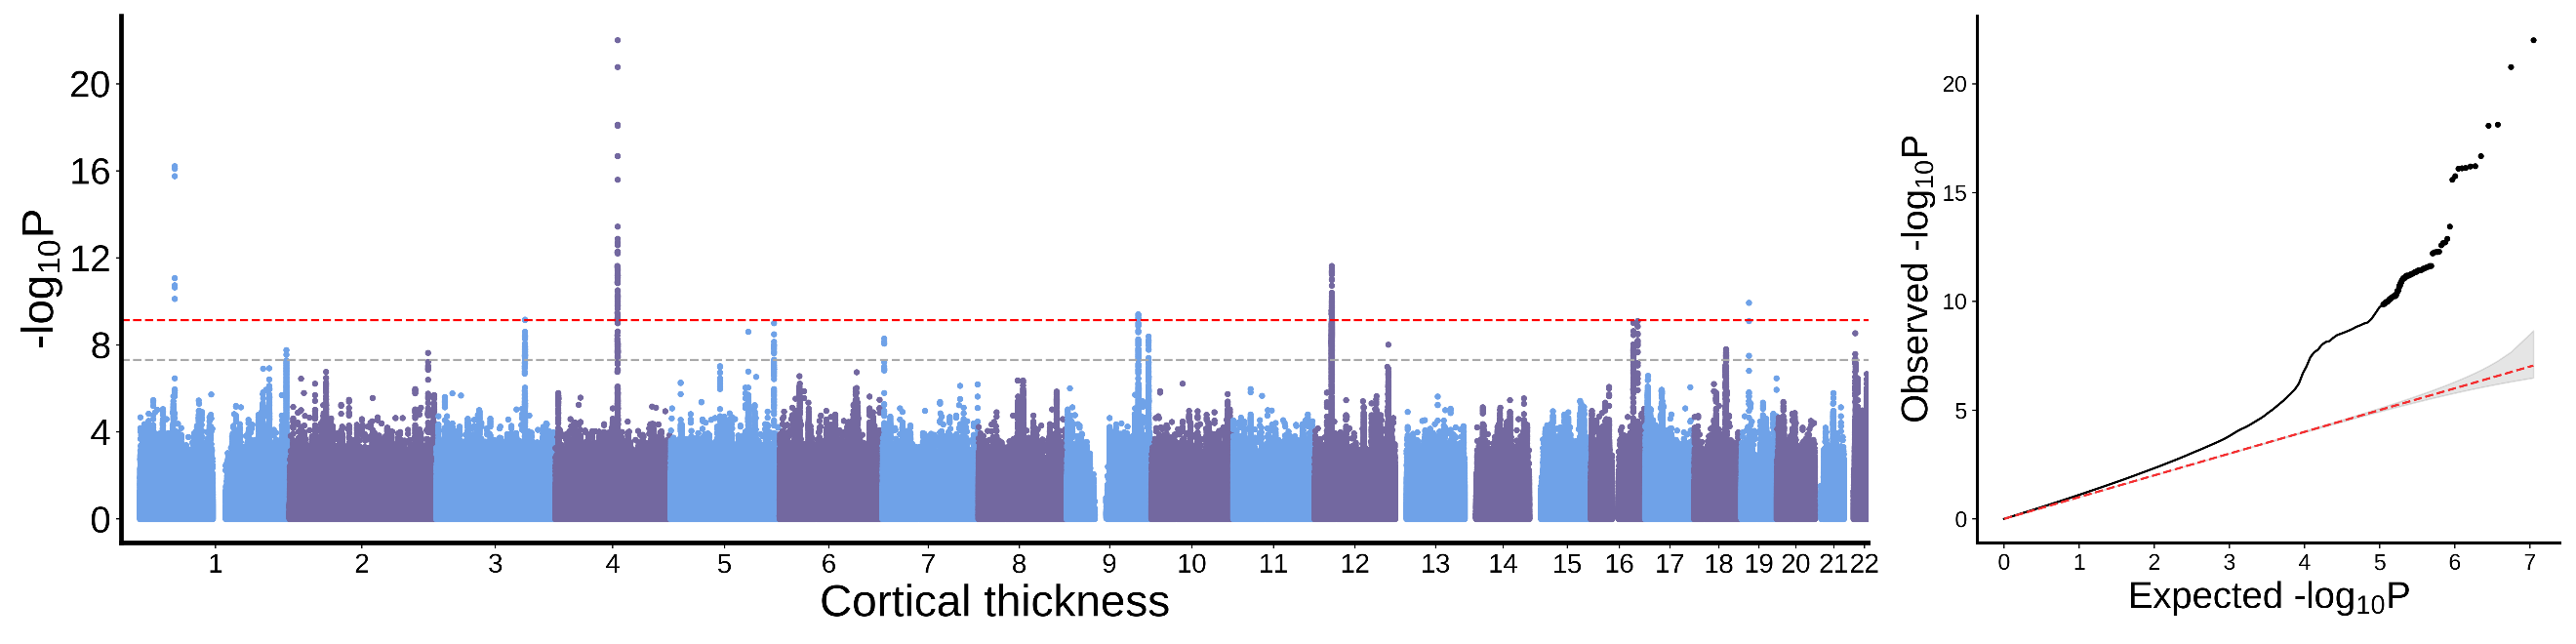


Paracentral cortex


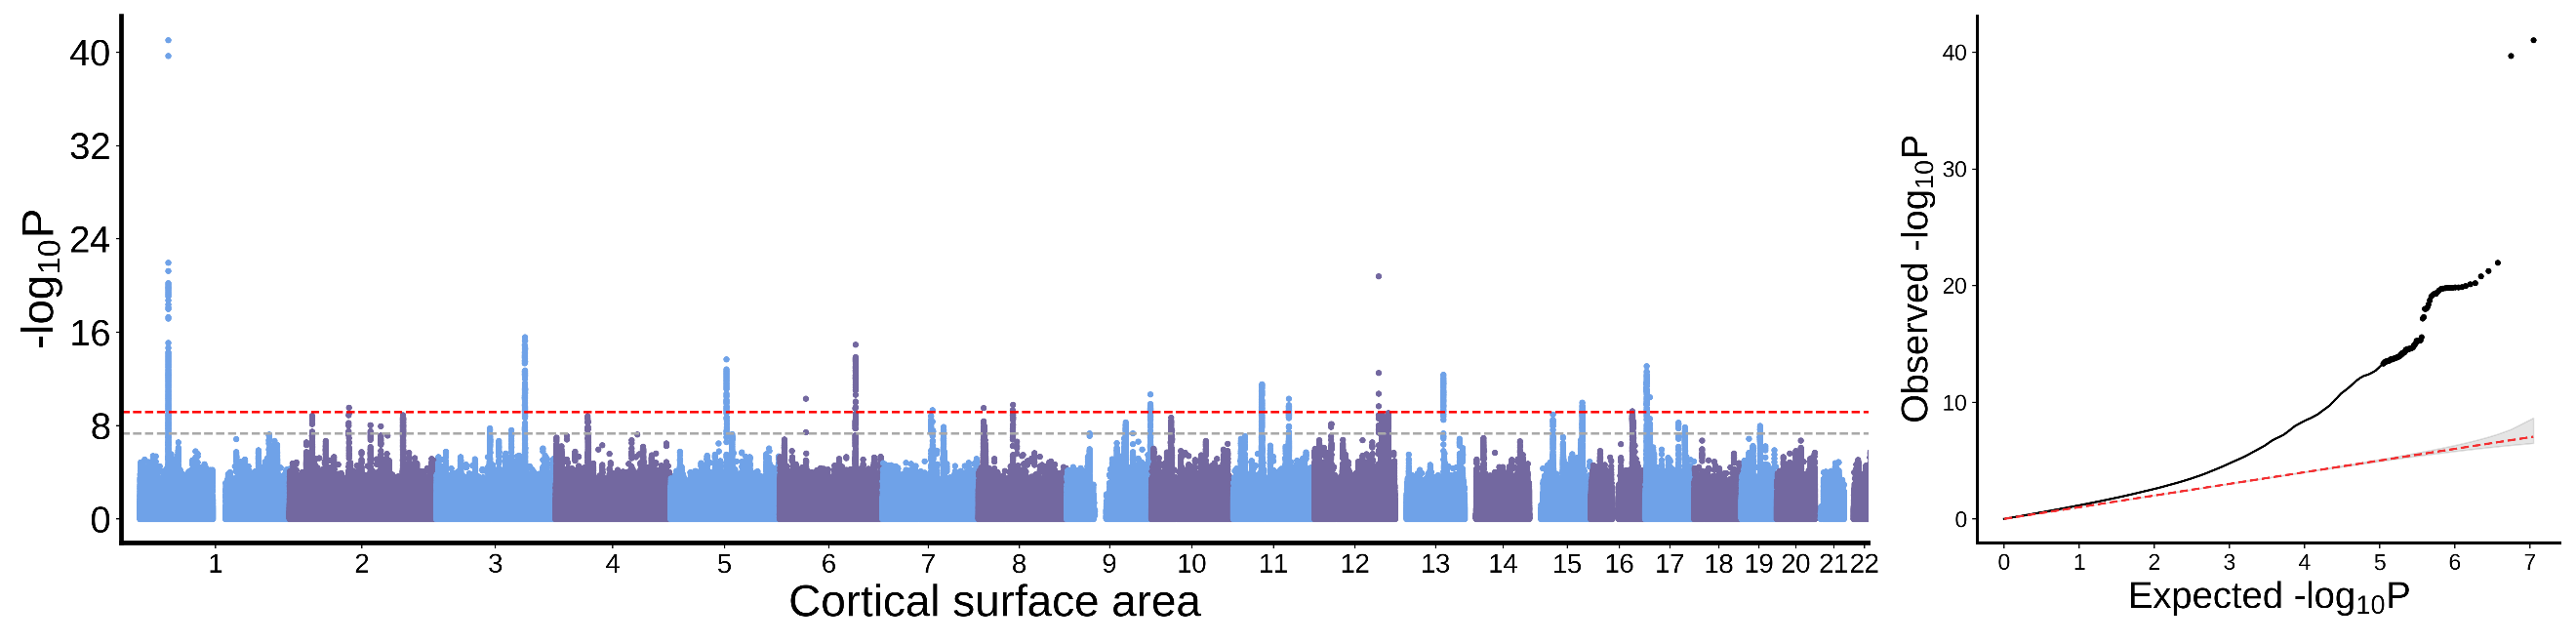


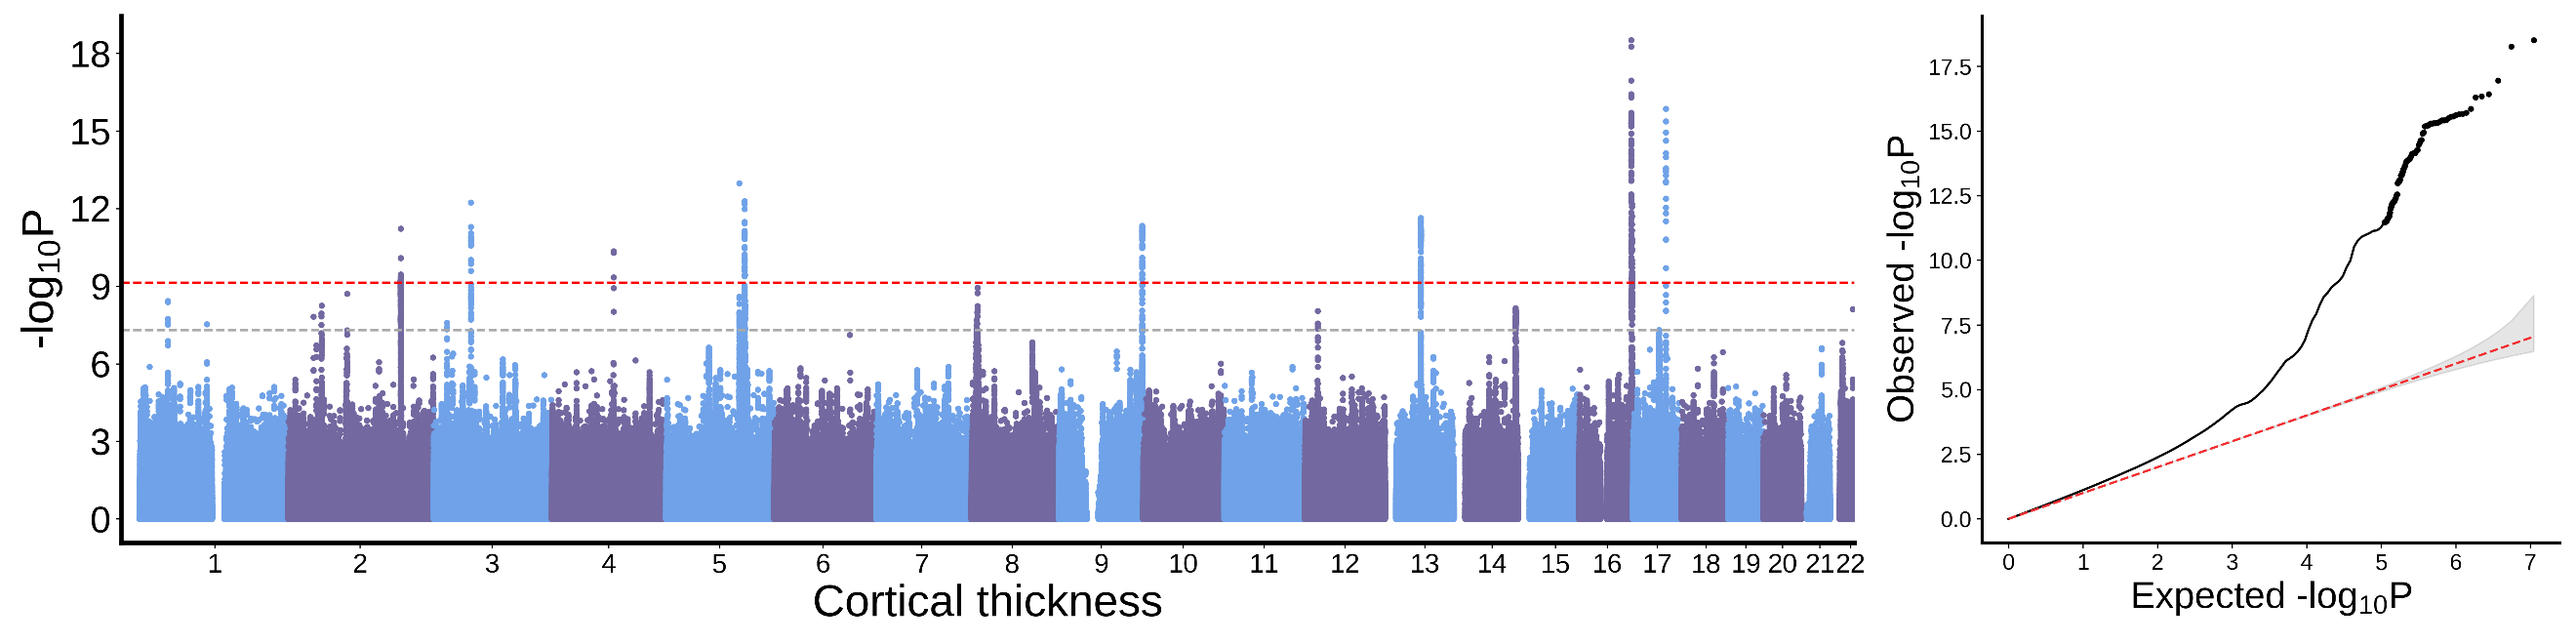


Precentral cortex


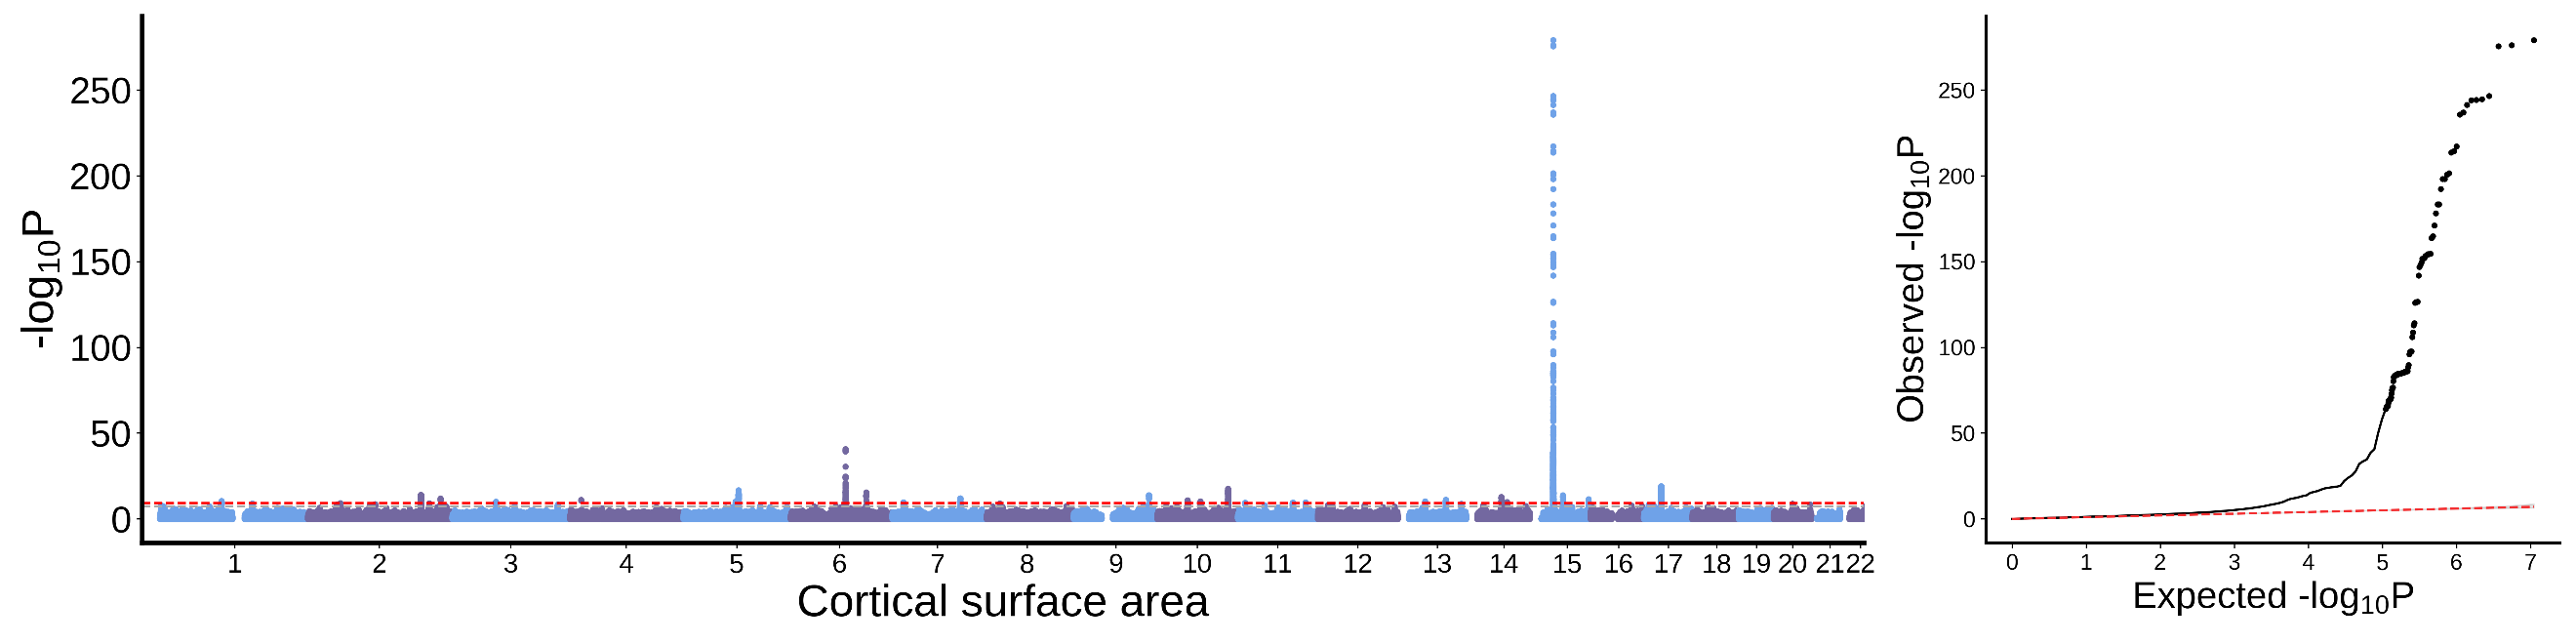


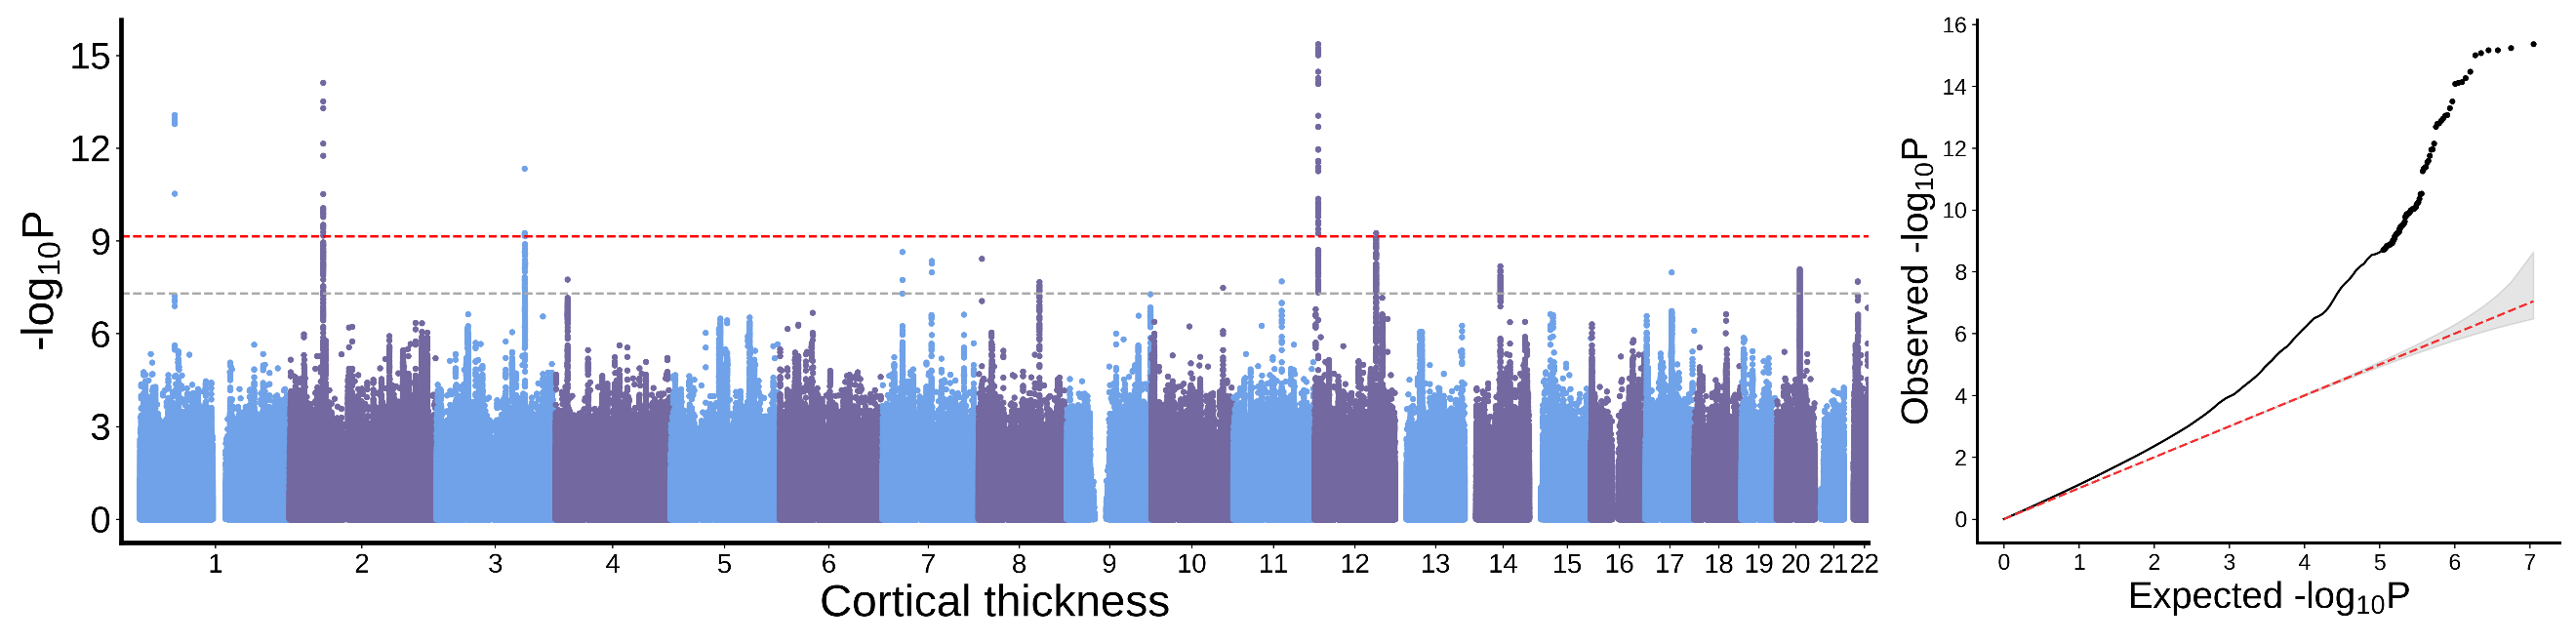


Postcentral cortex


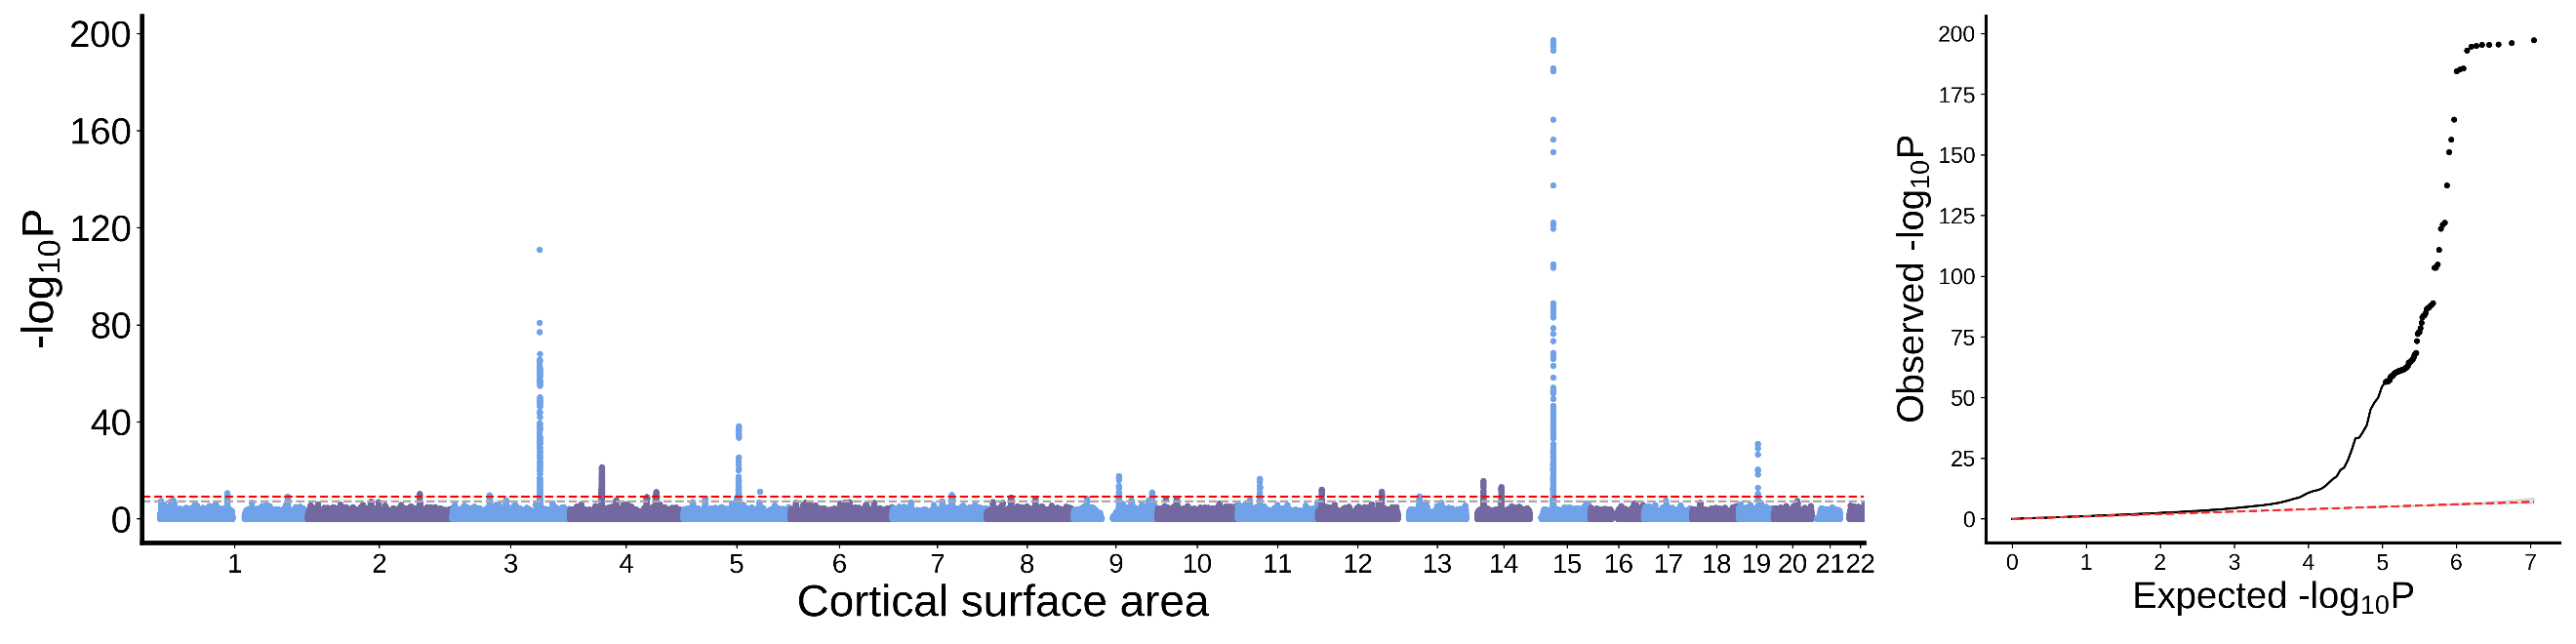


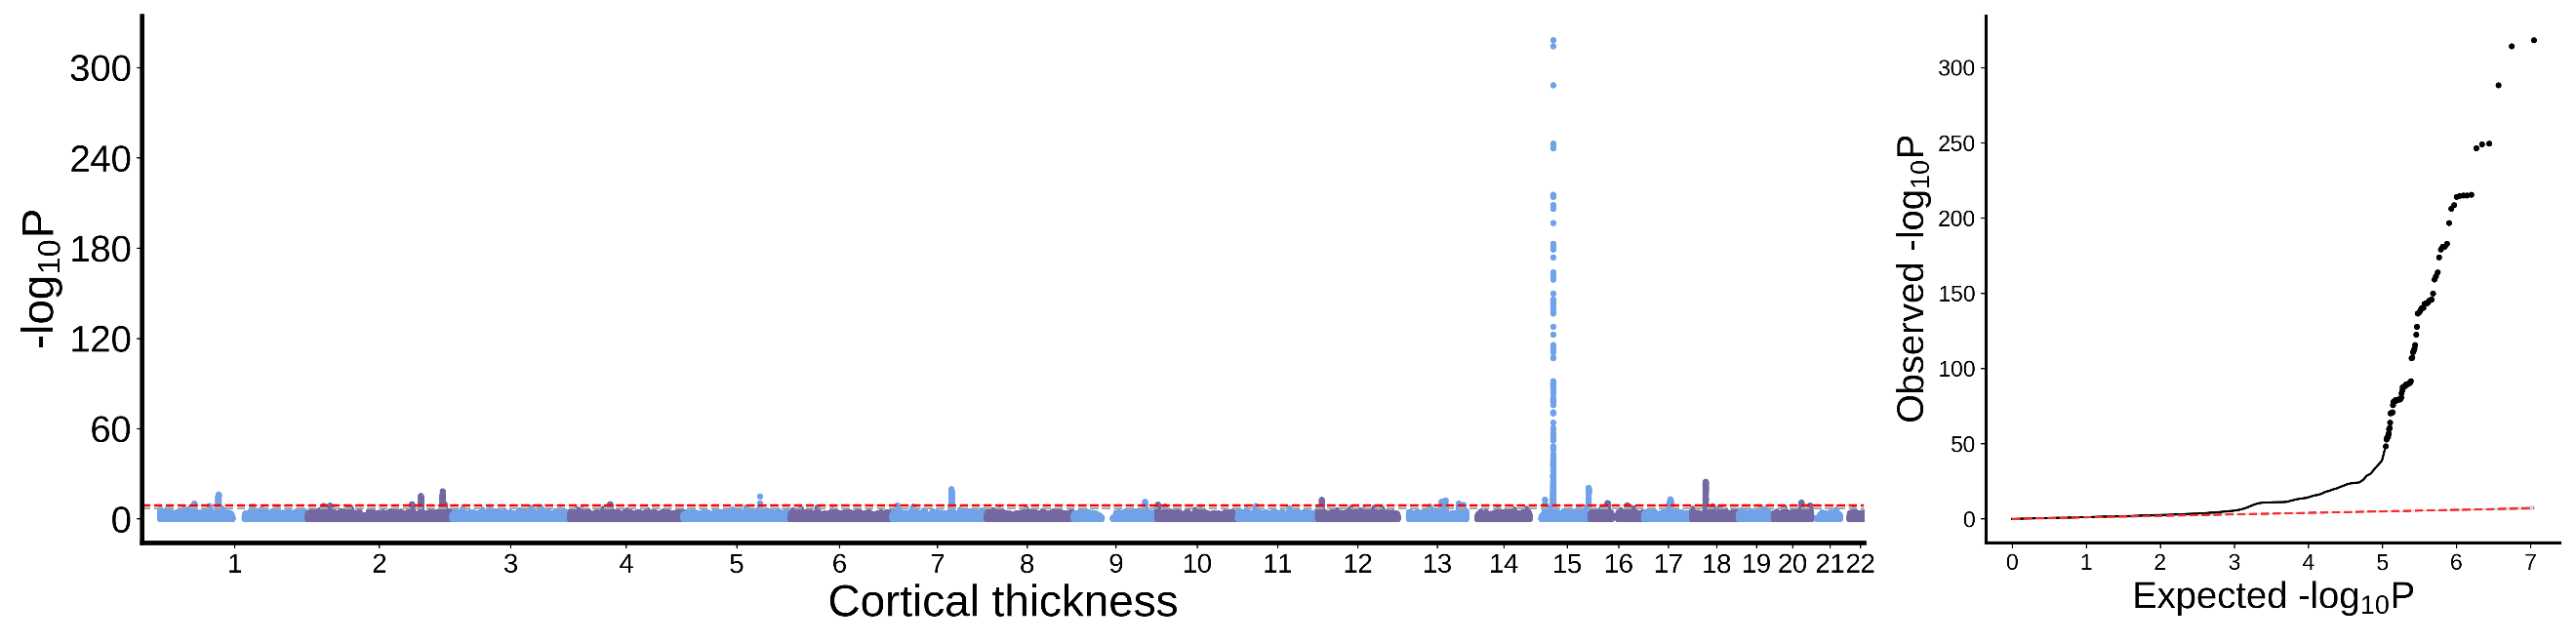


Precuneus cortex


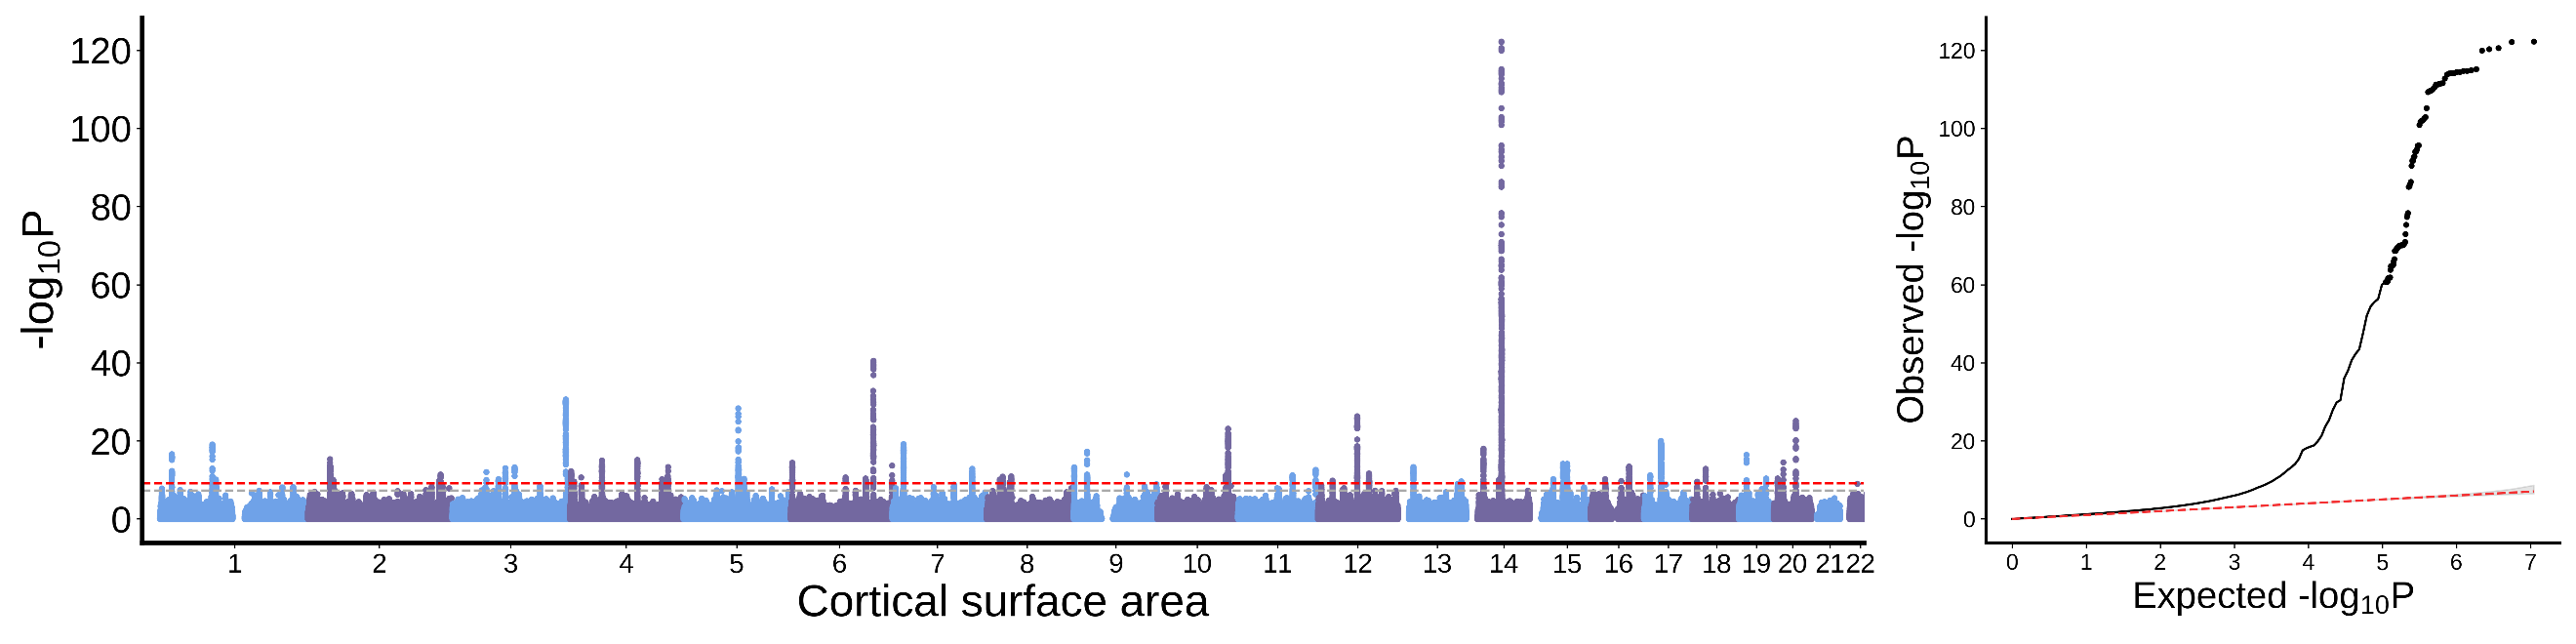


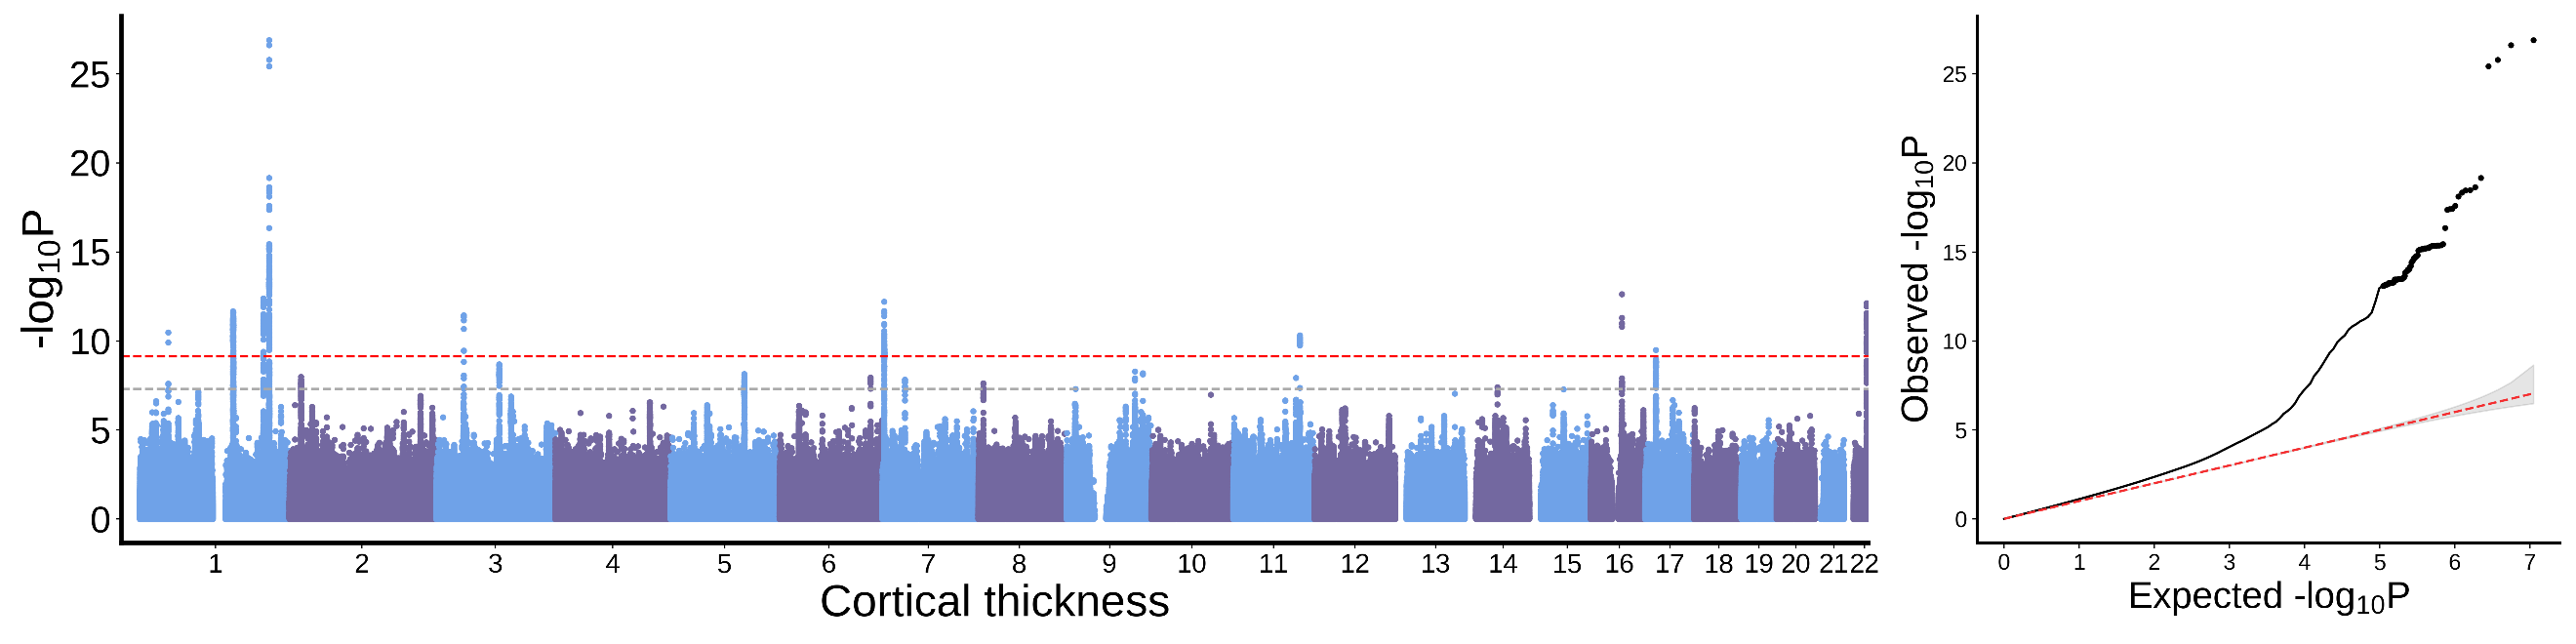


Superior parietal cortex


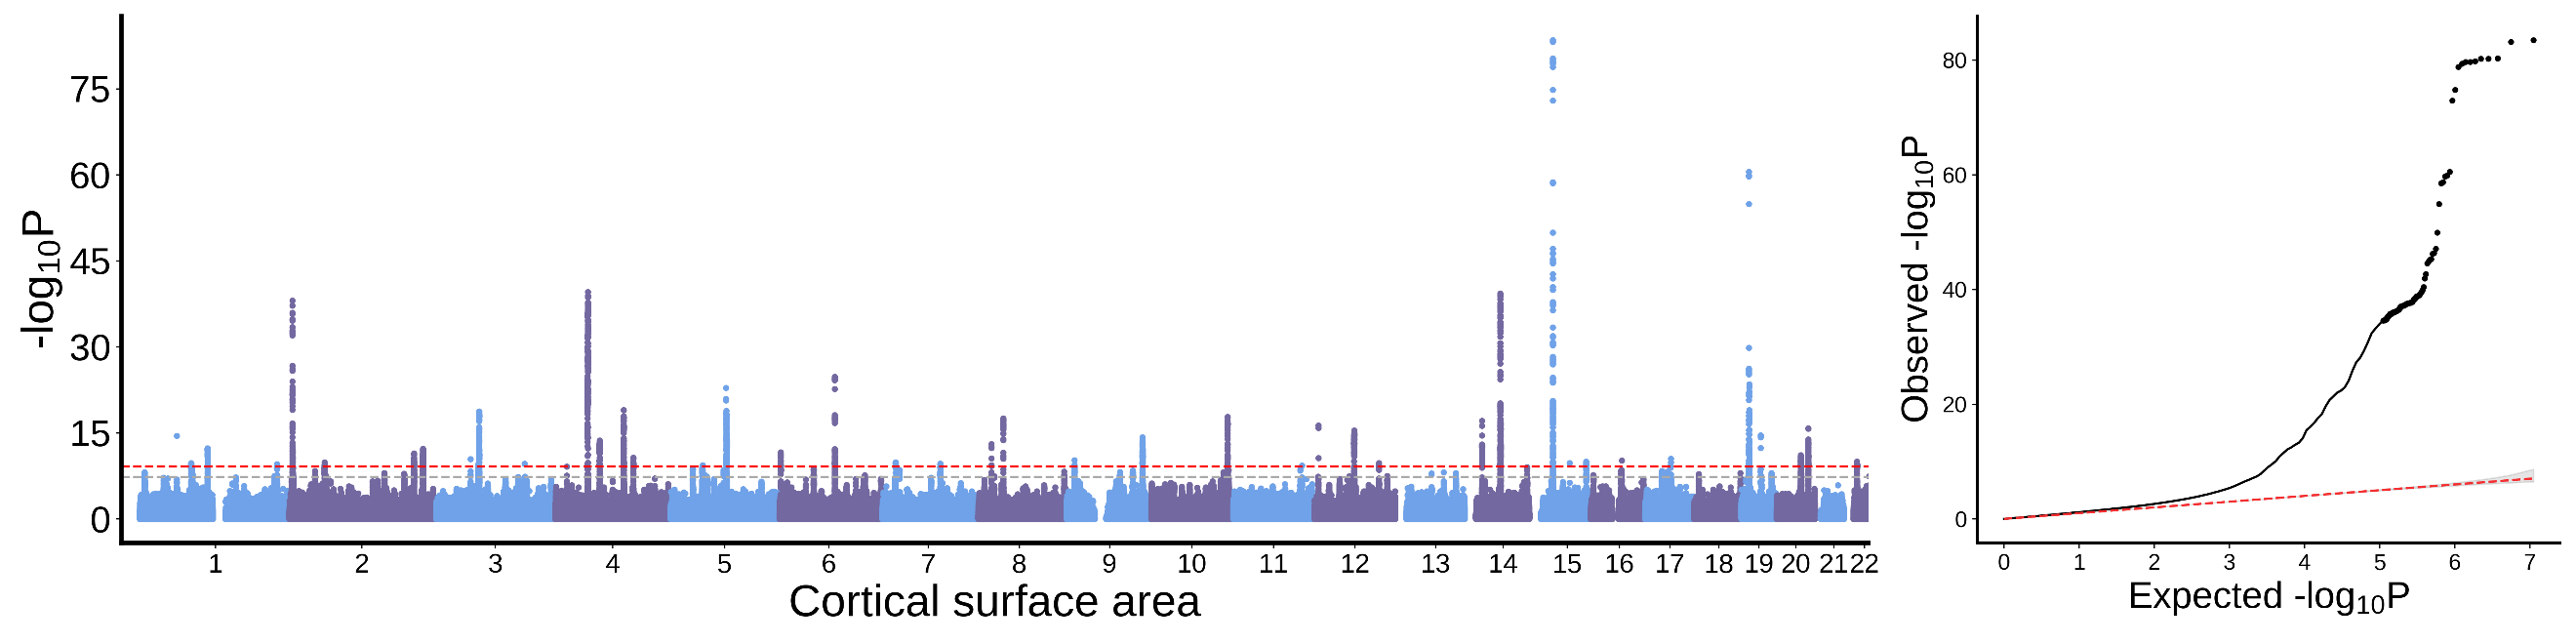


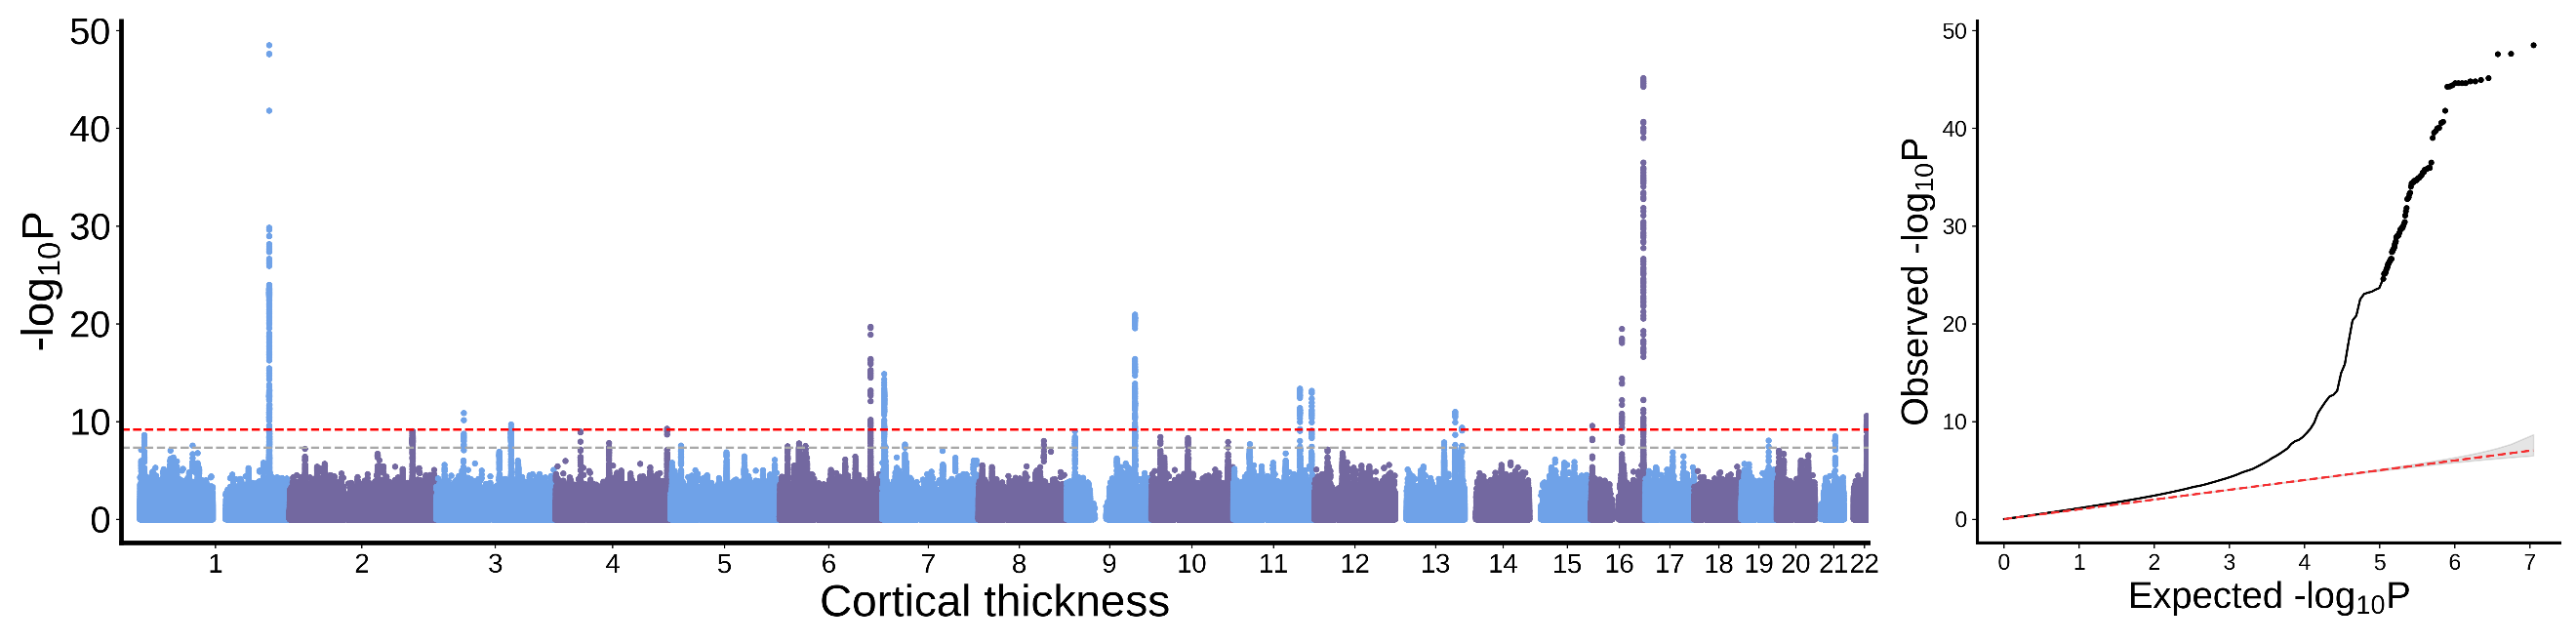


Supramarginal cortex


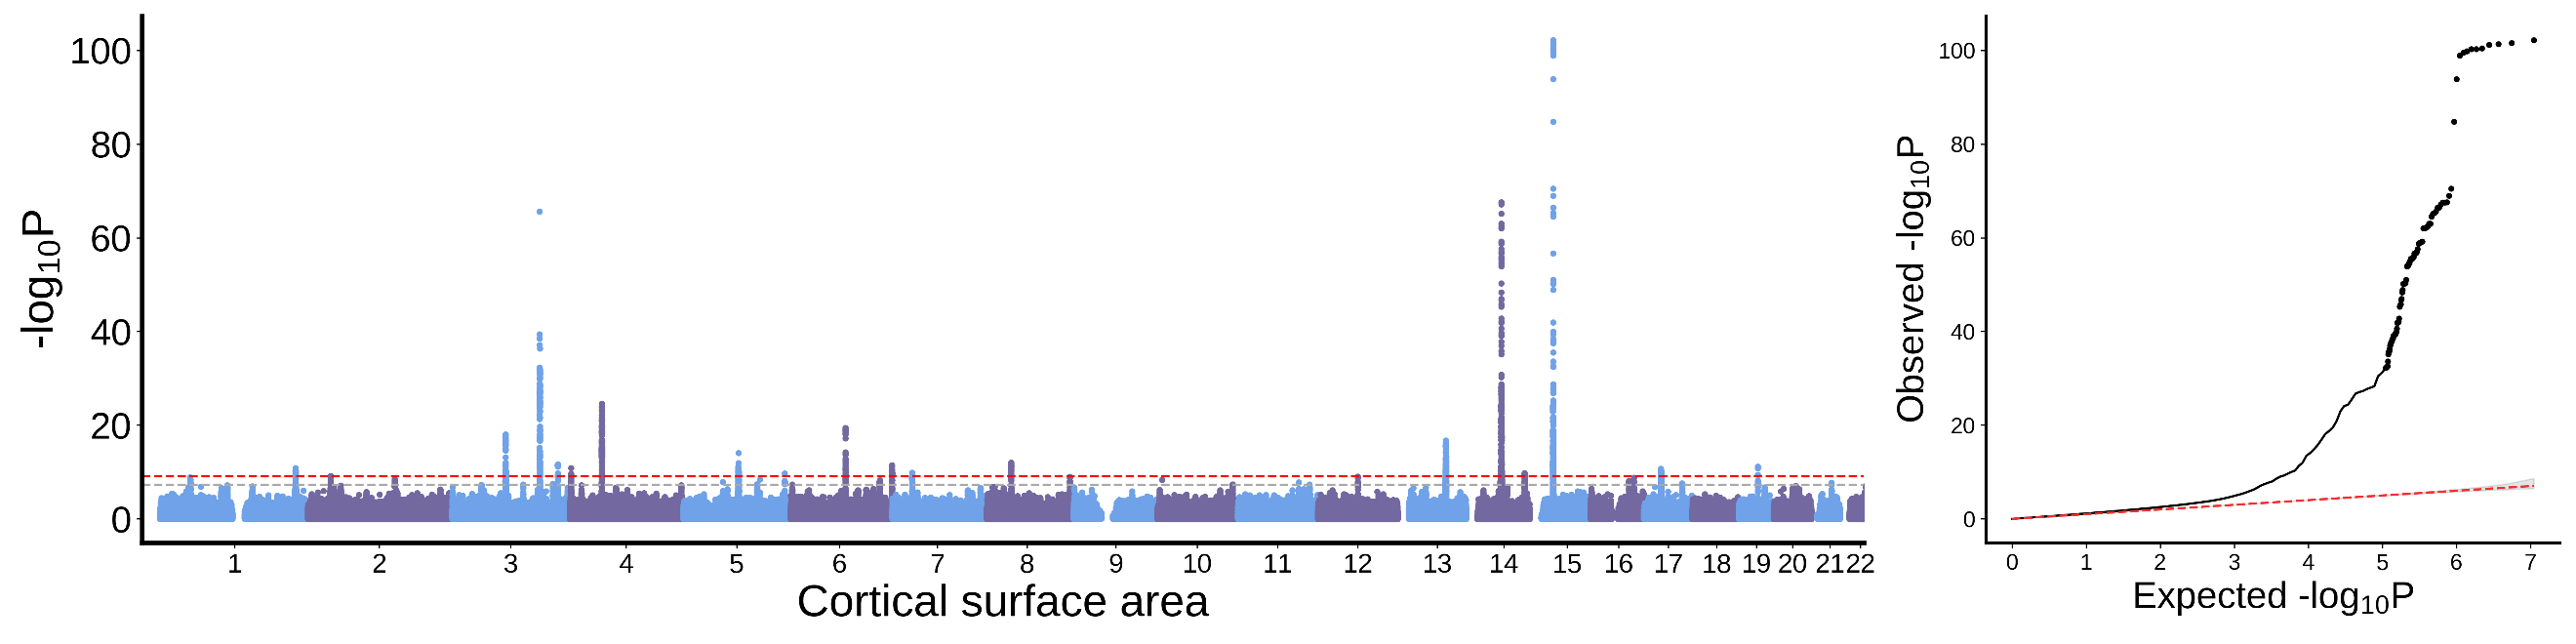


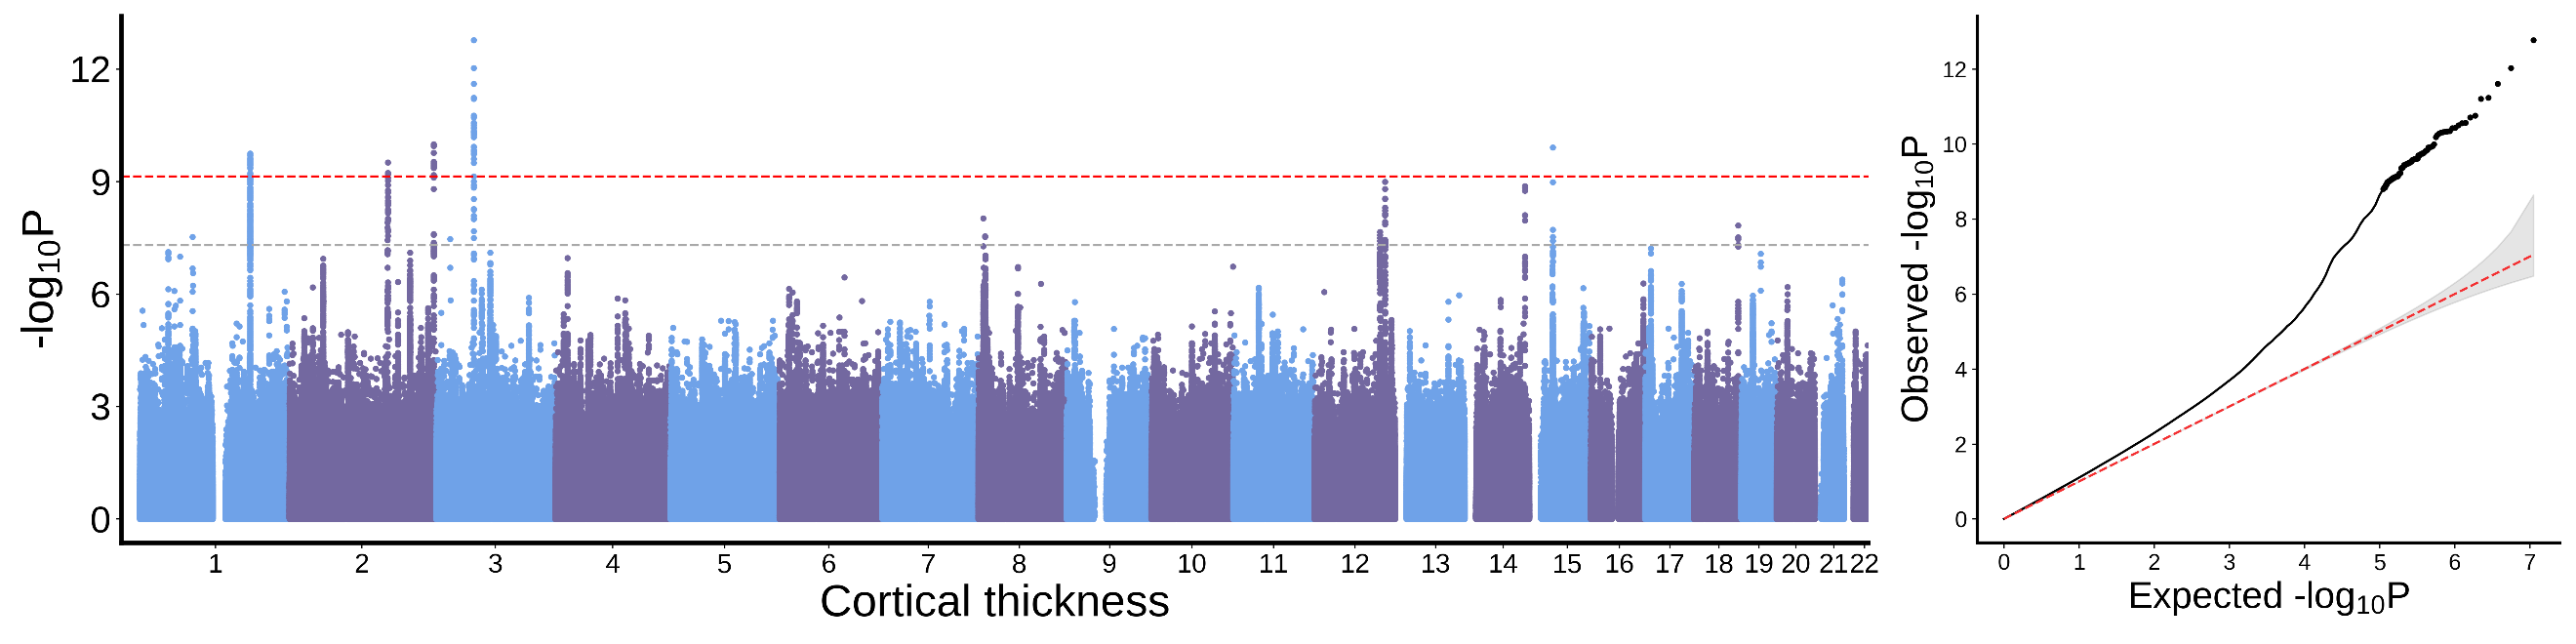


Inferior parietal cortex


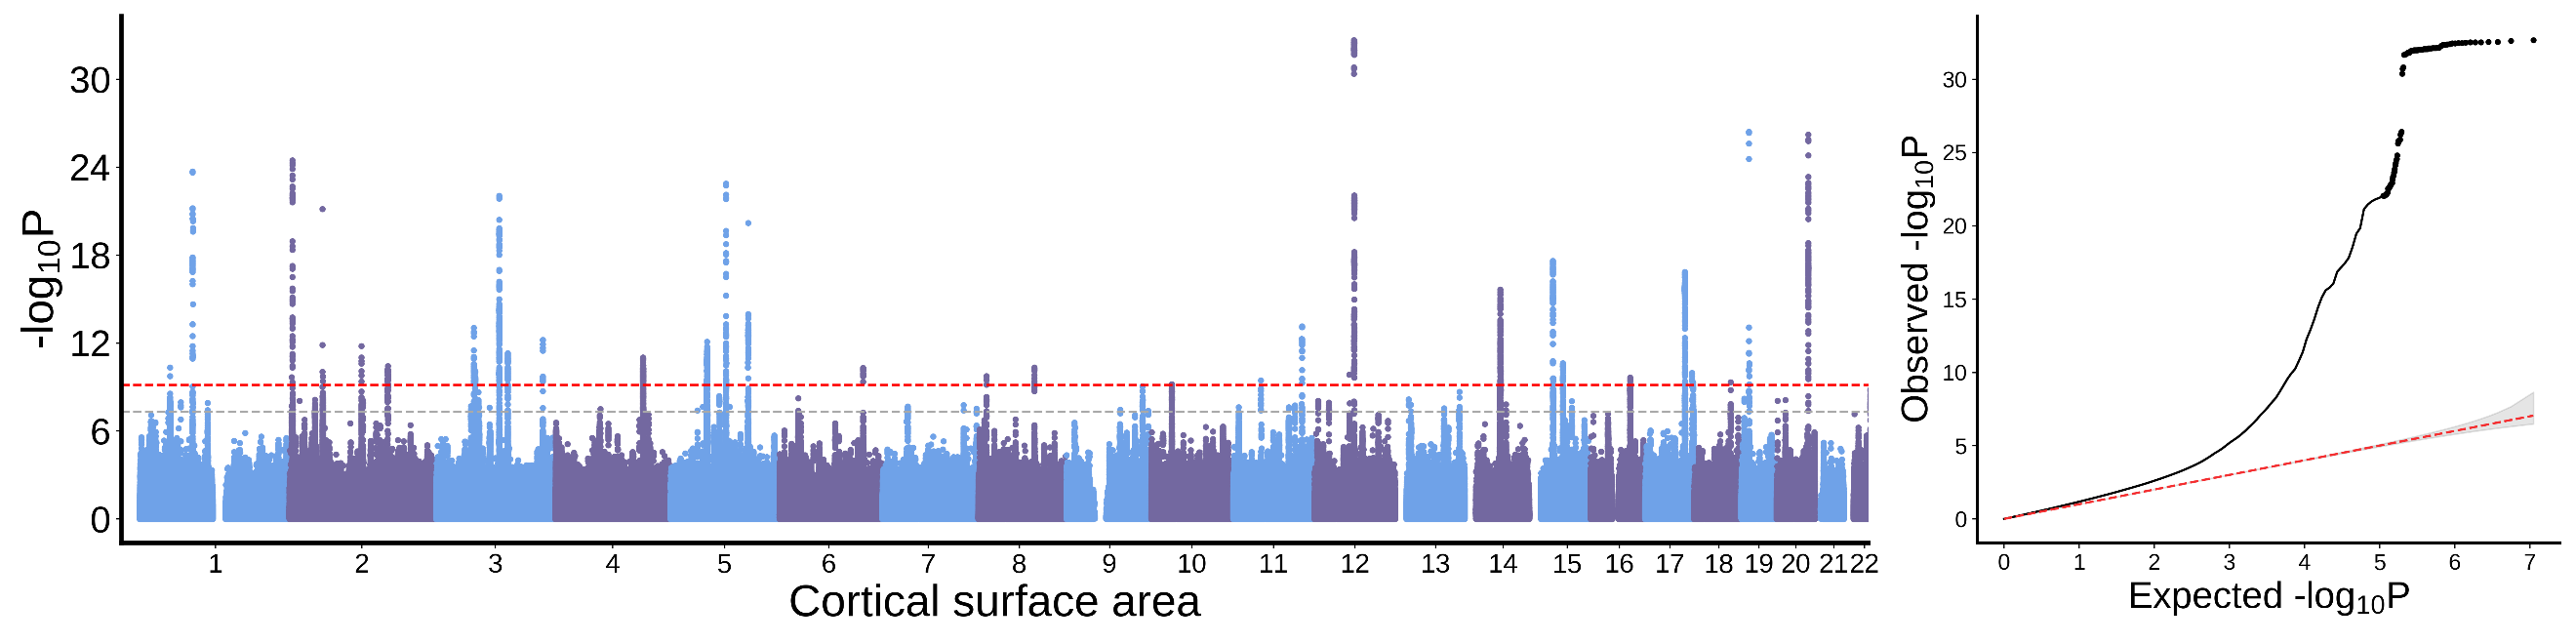


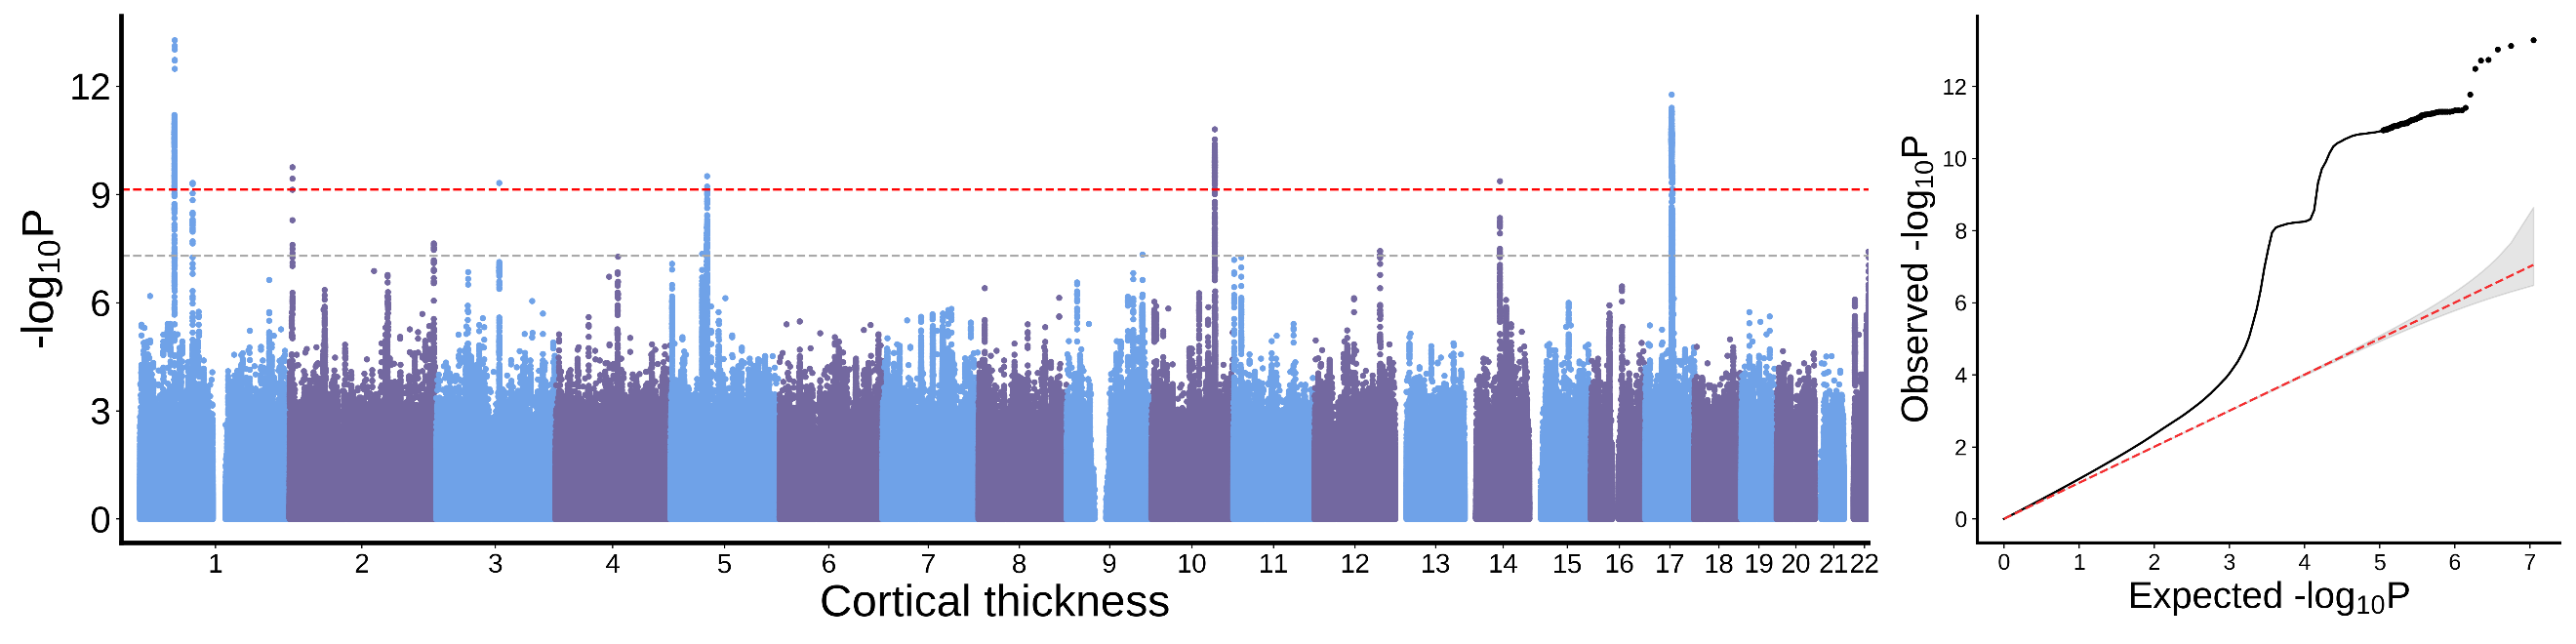


Posterior cingulate cortex


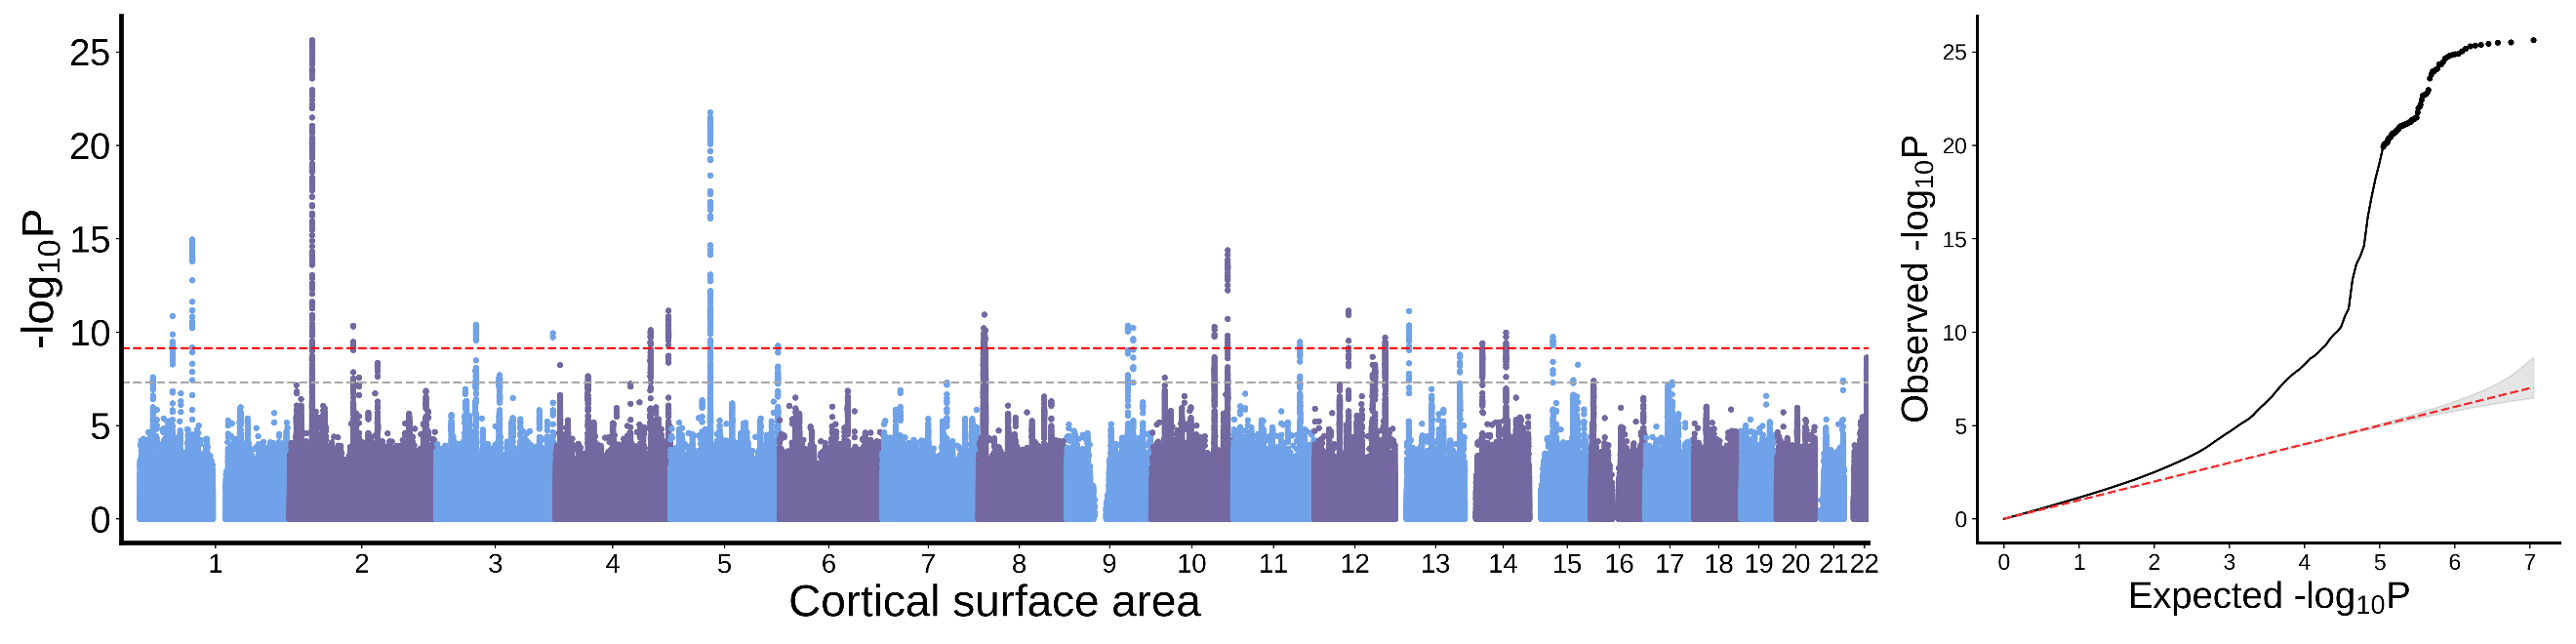


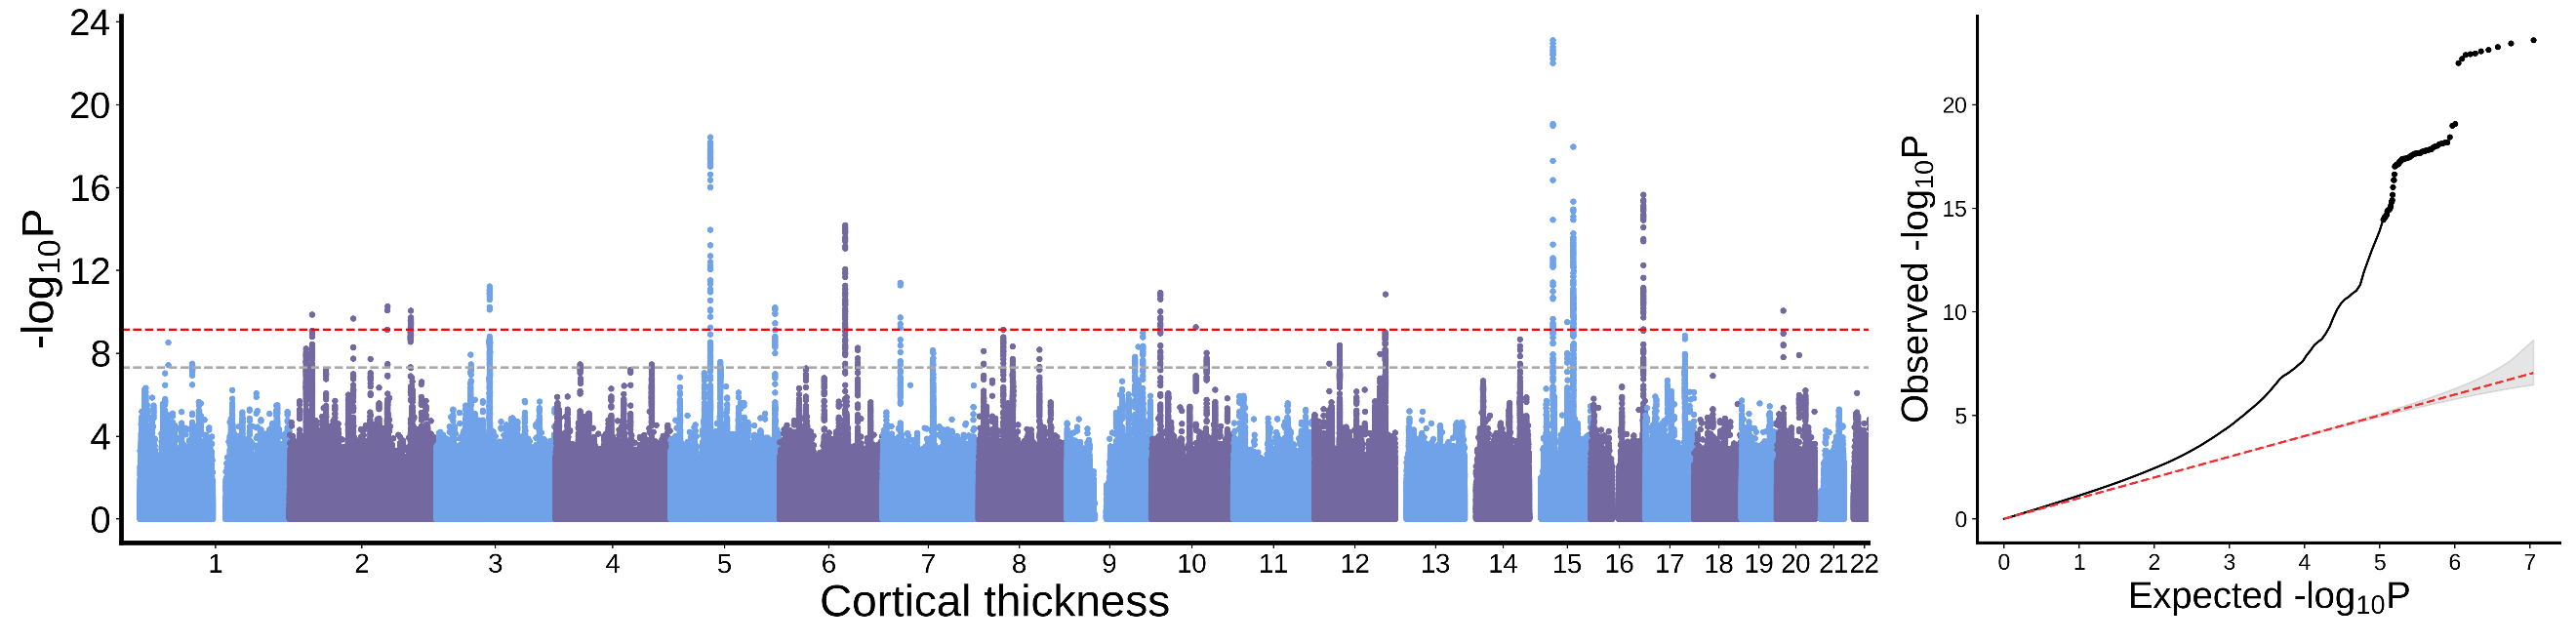


Isthmus cingulate cortex


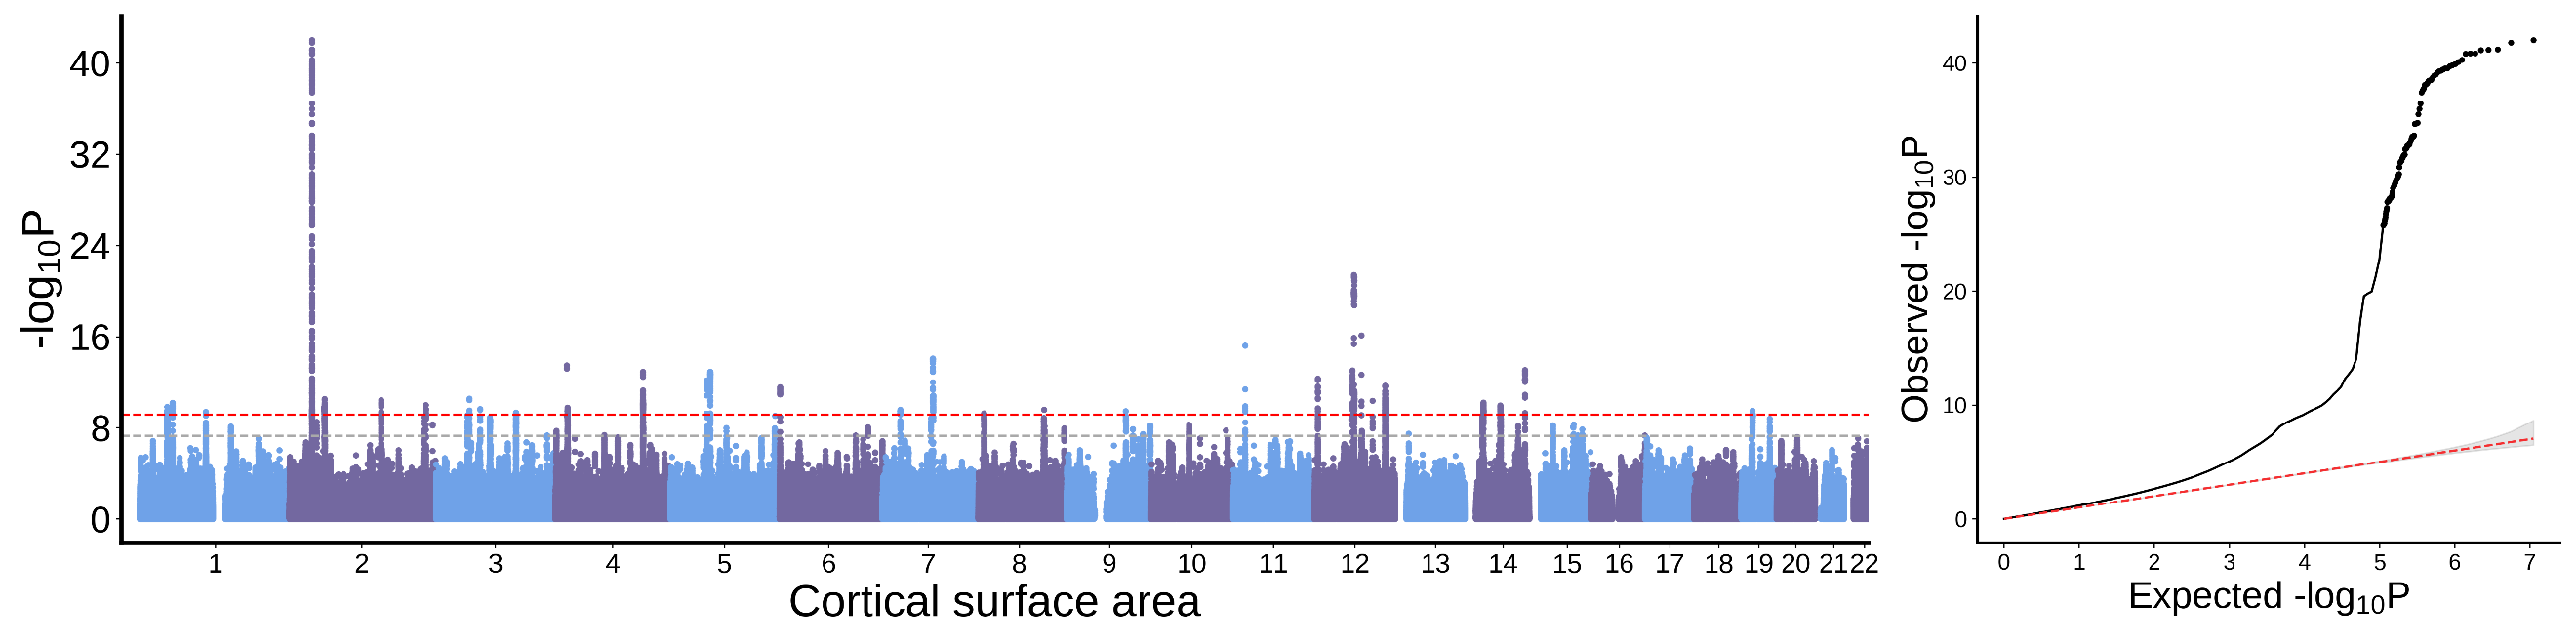


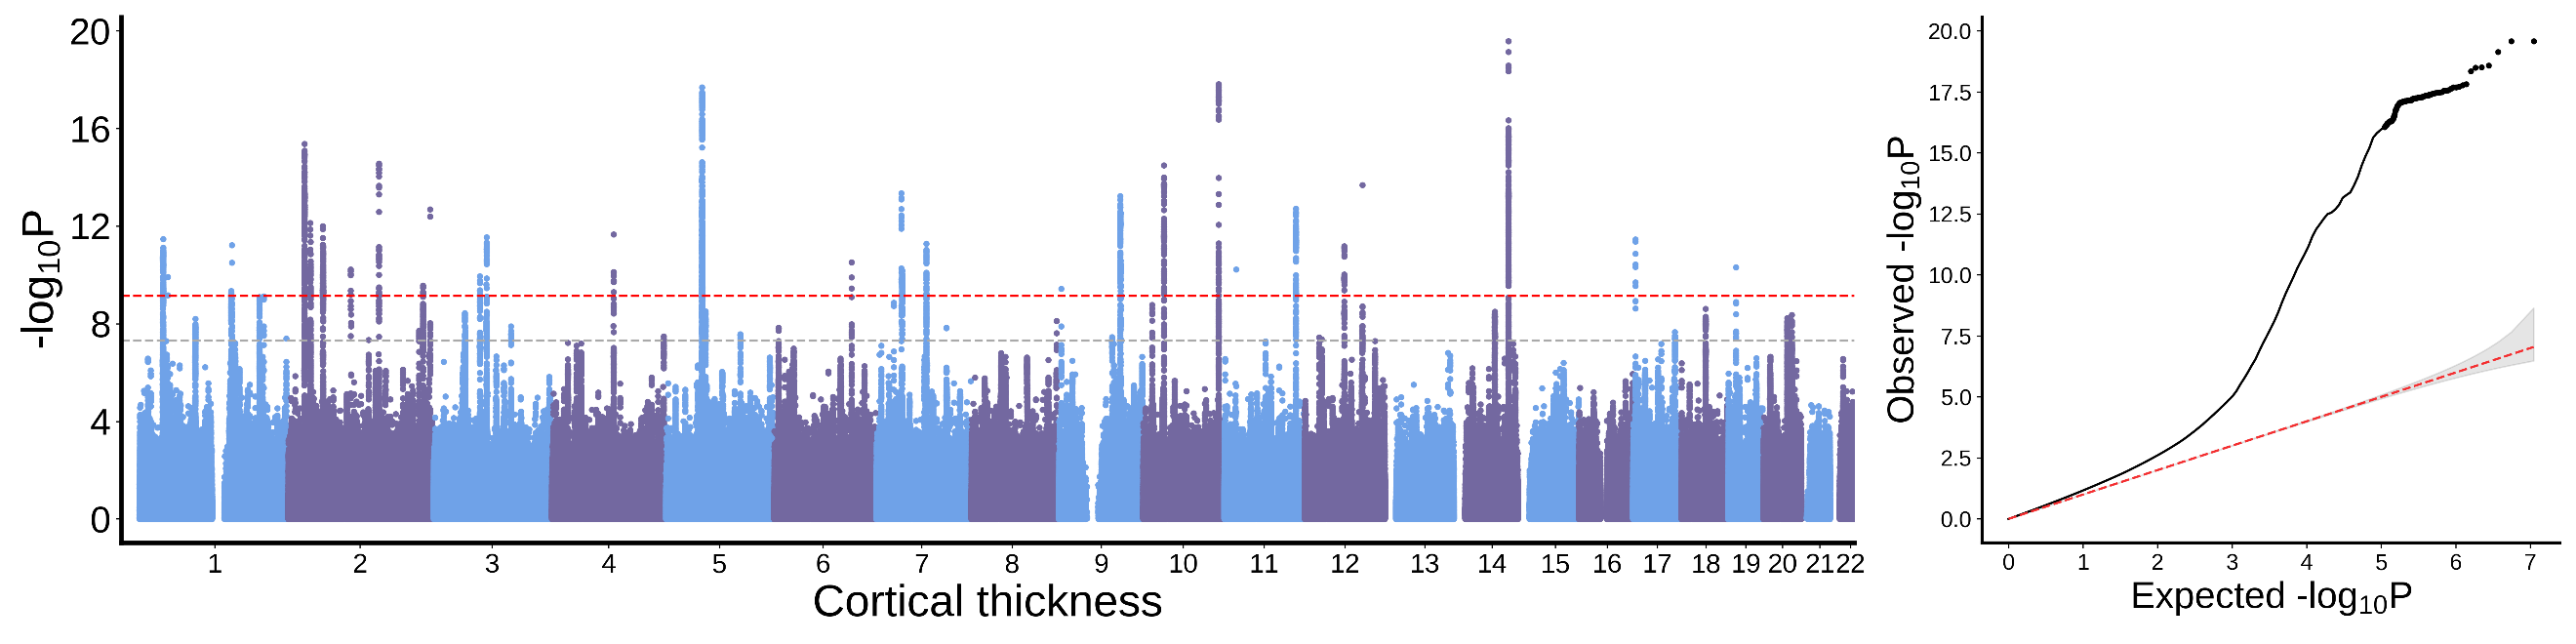


Insula cortex


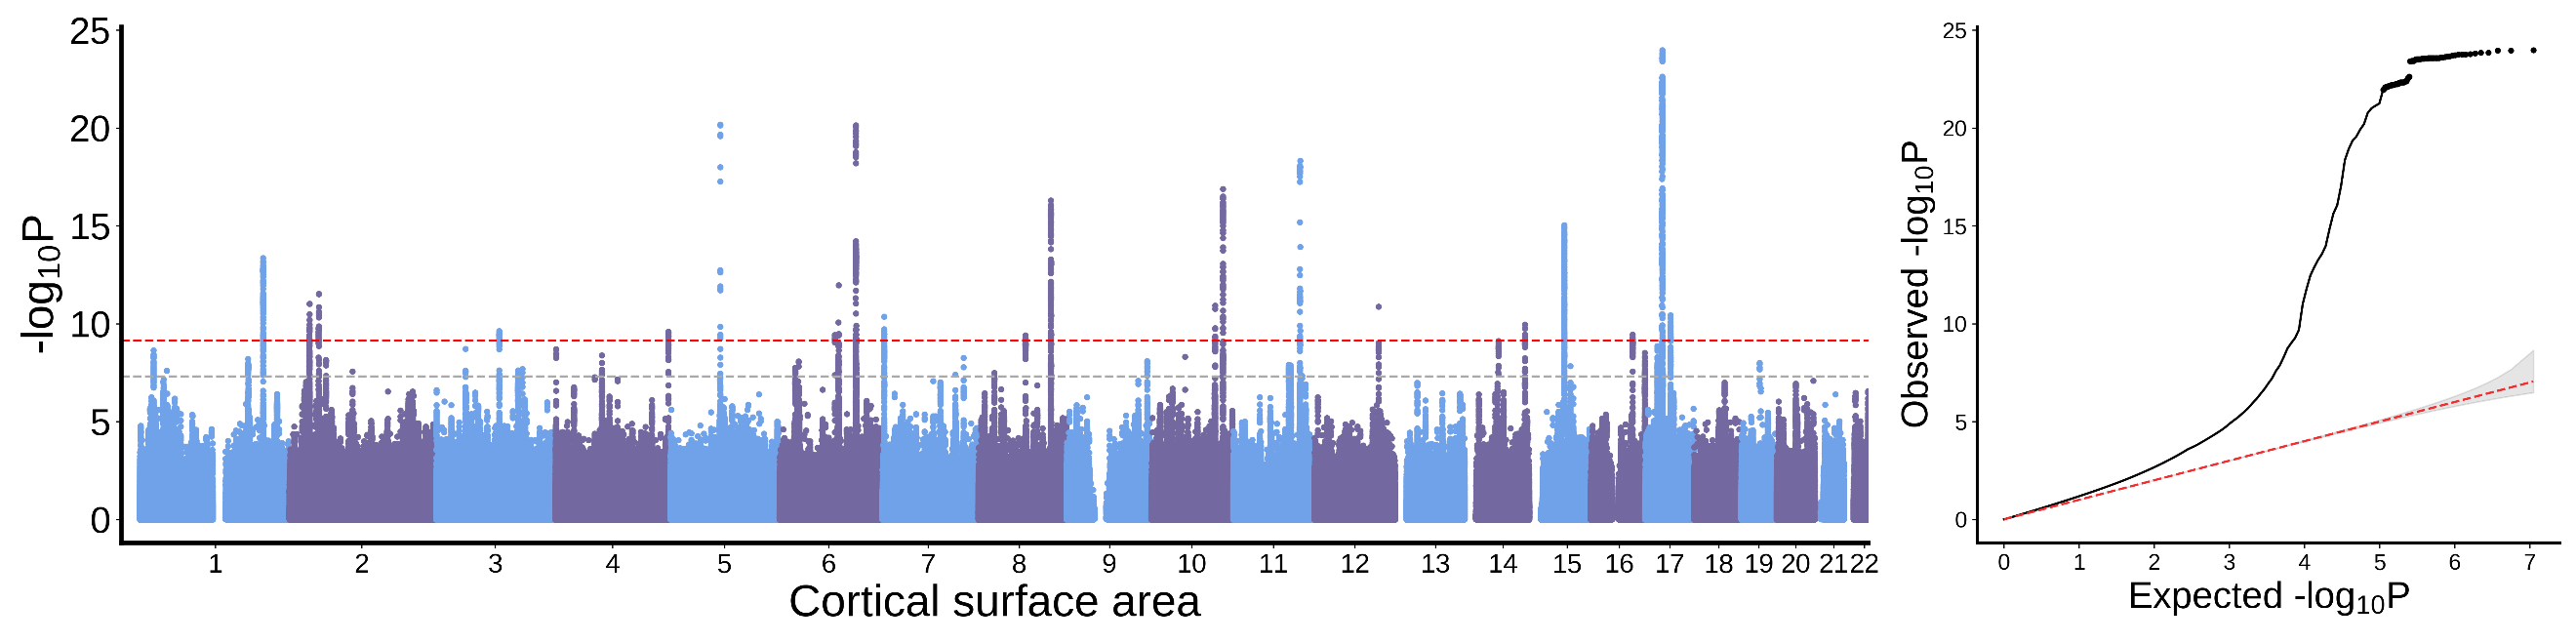


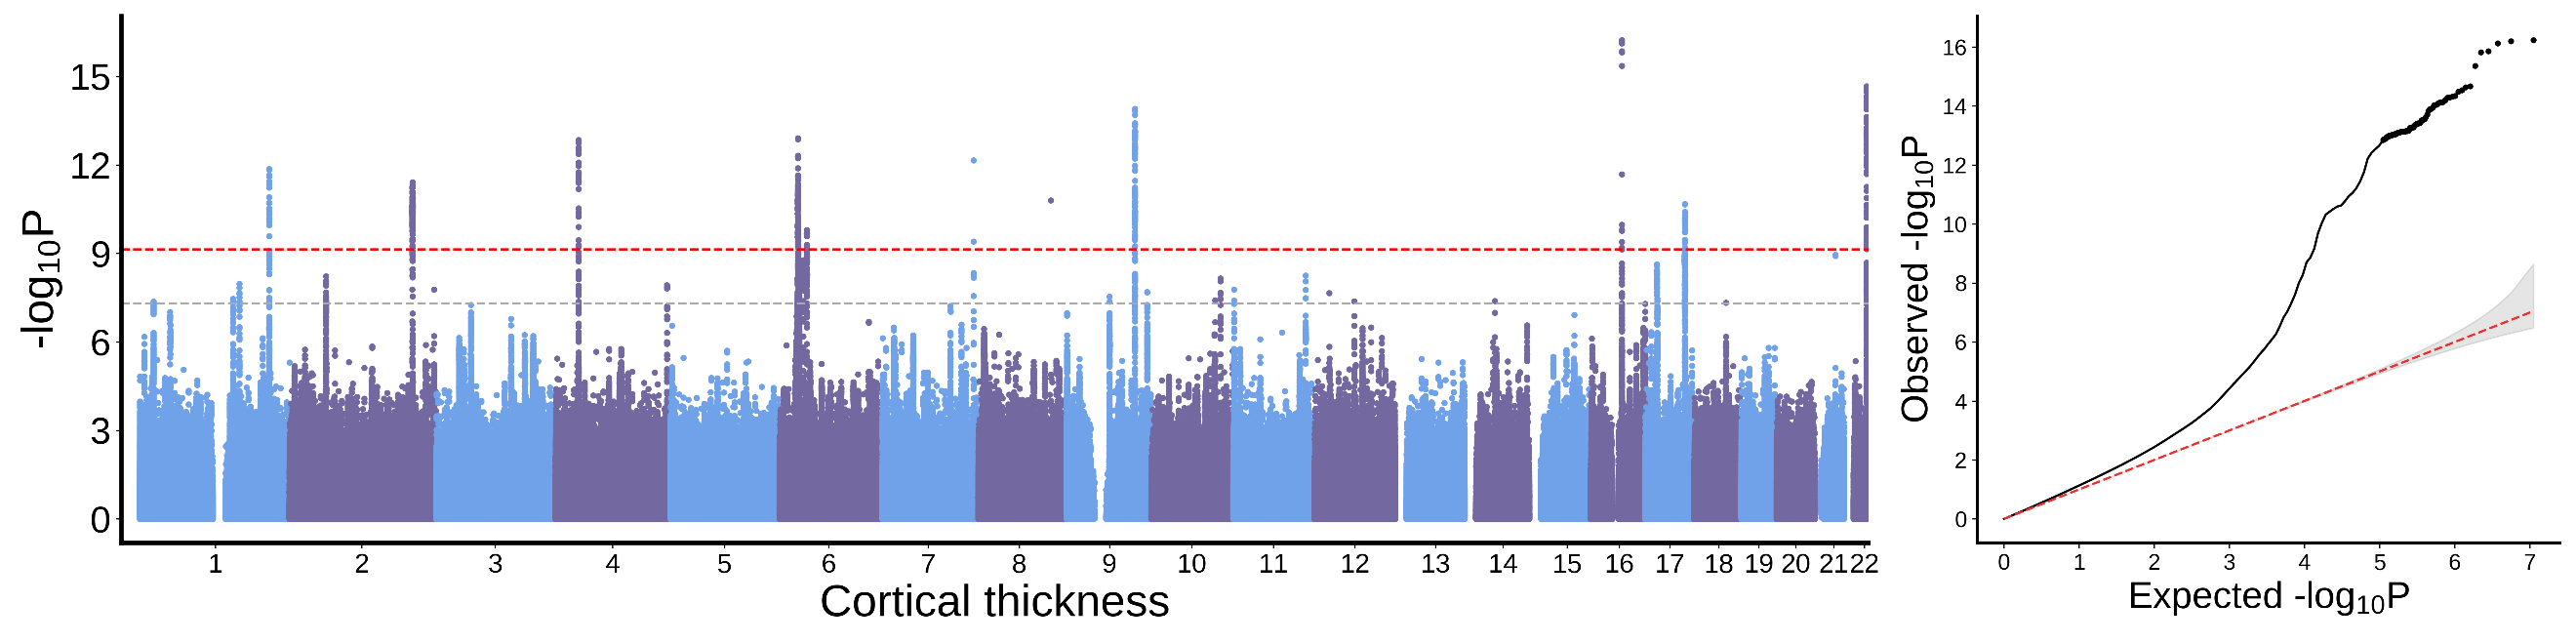


Entorhinal cortex


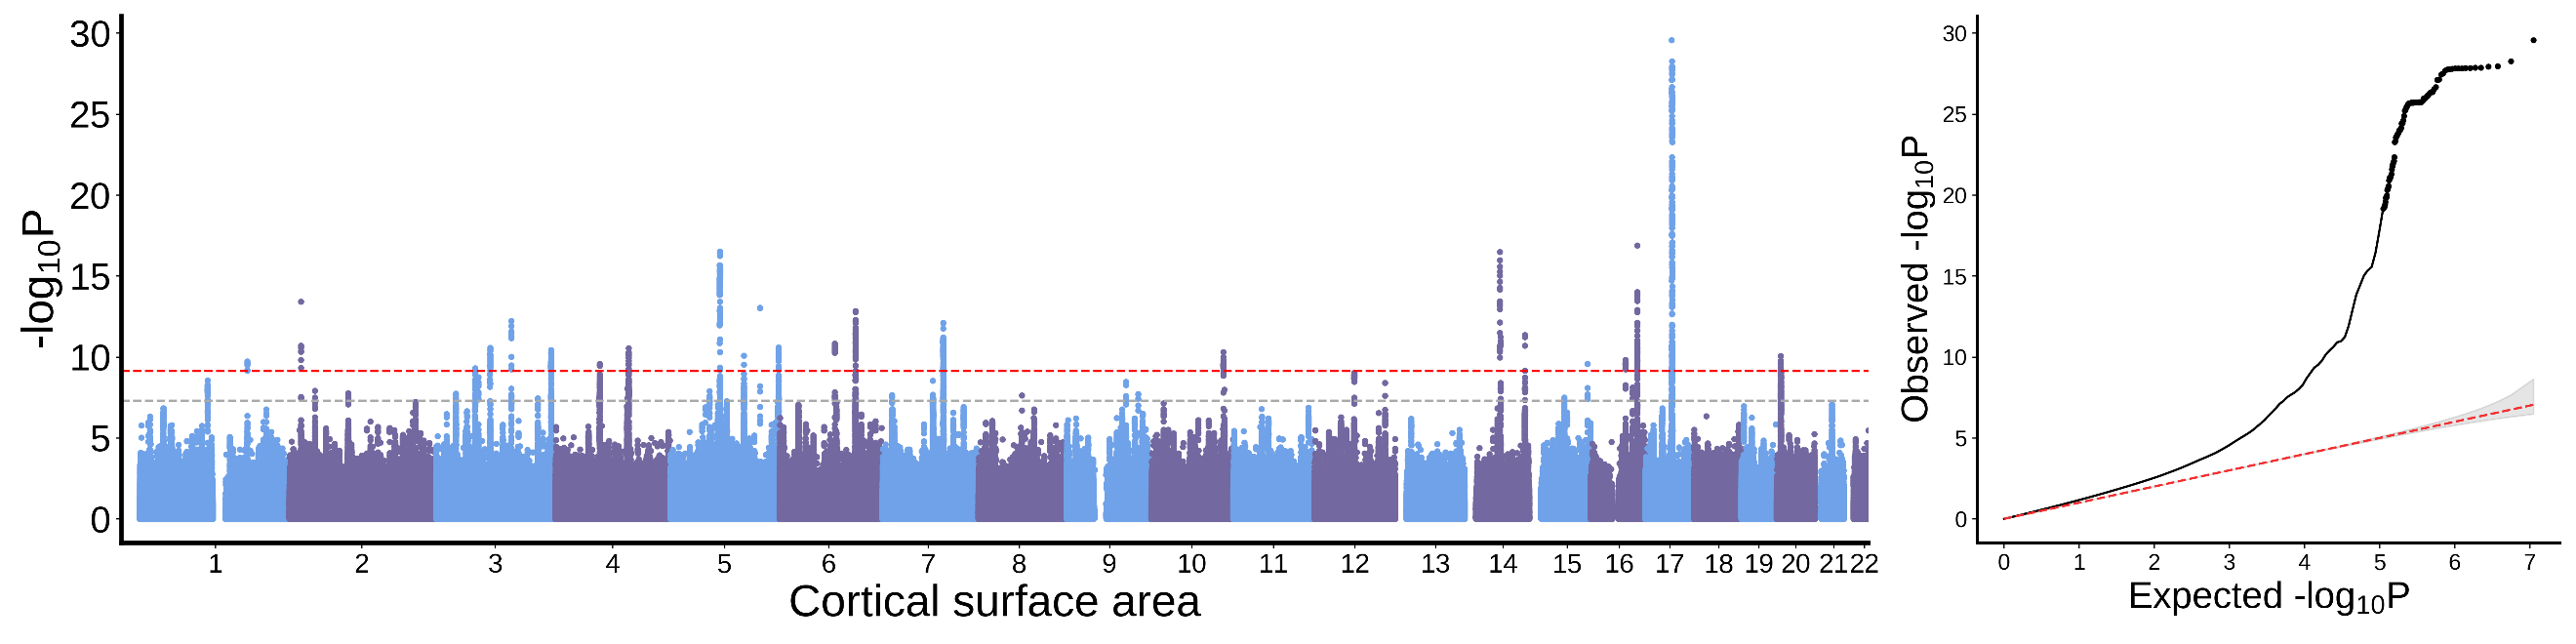


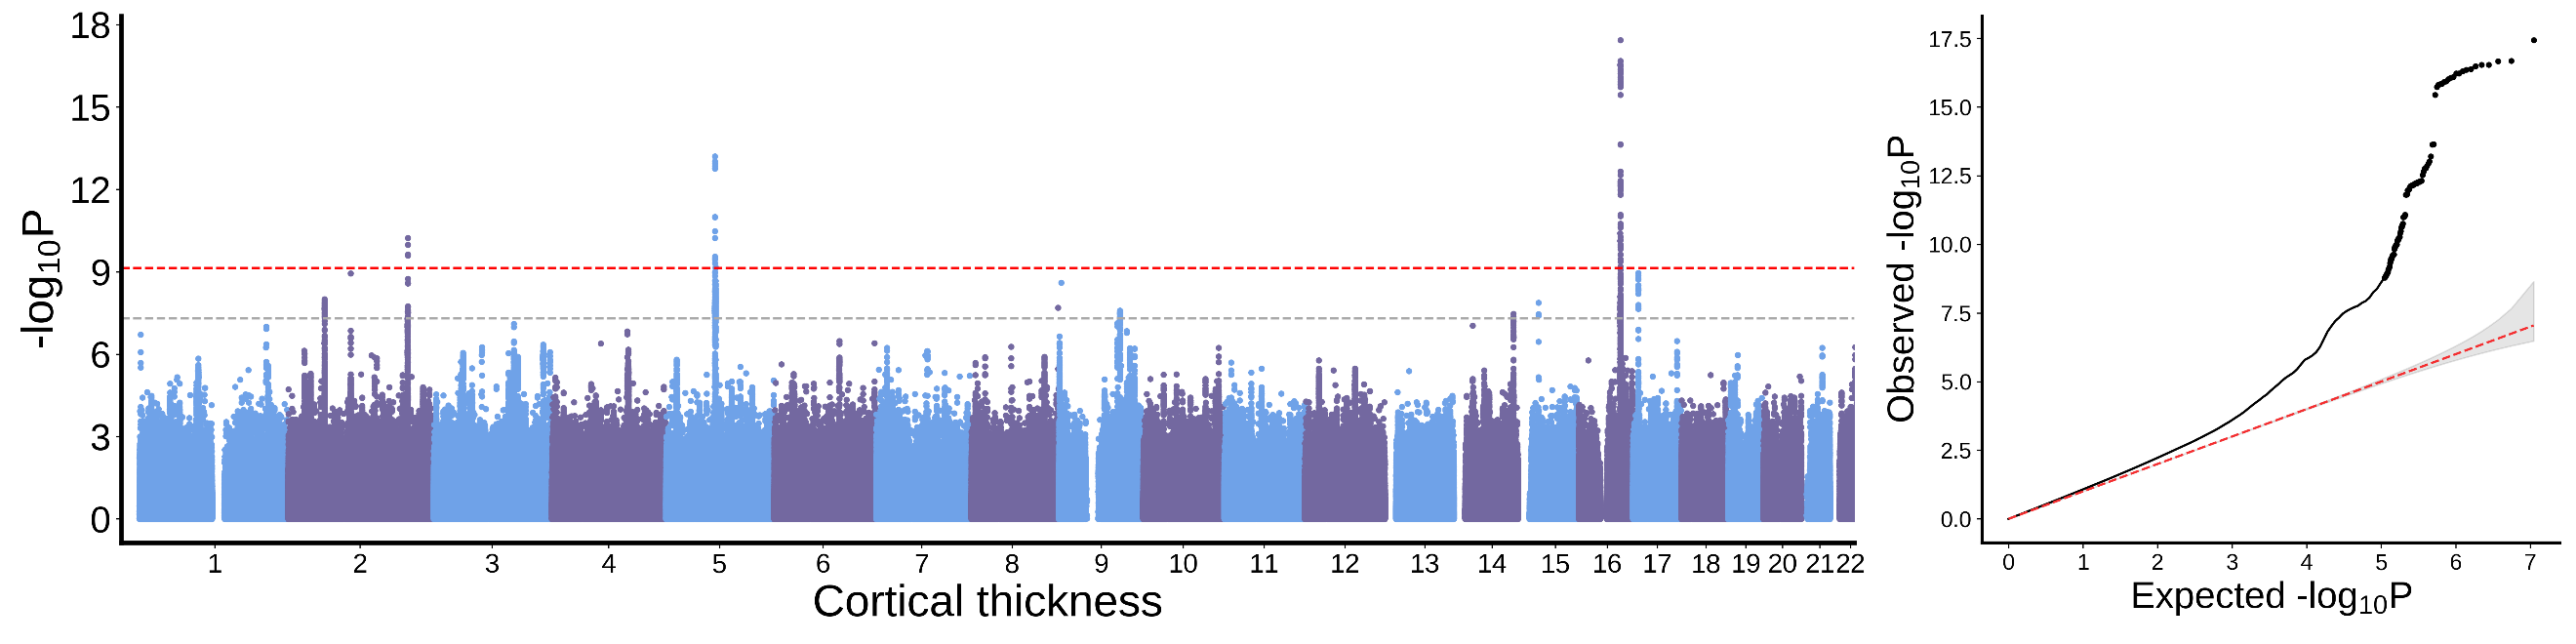


Parahippocampal cortex


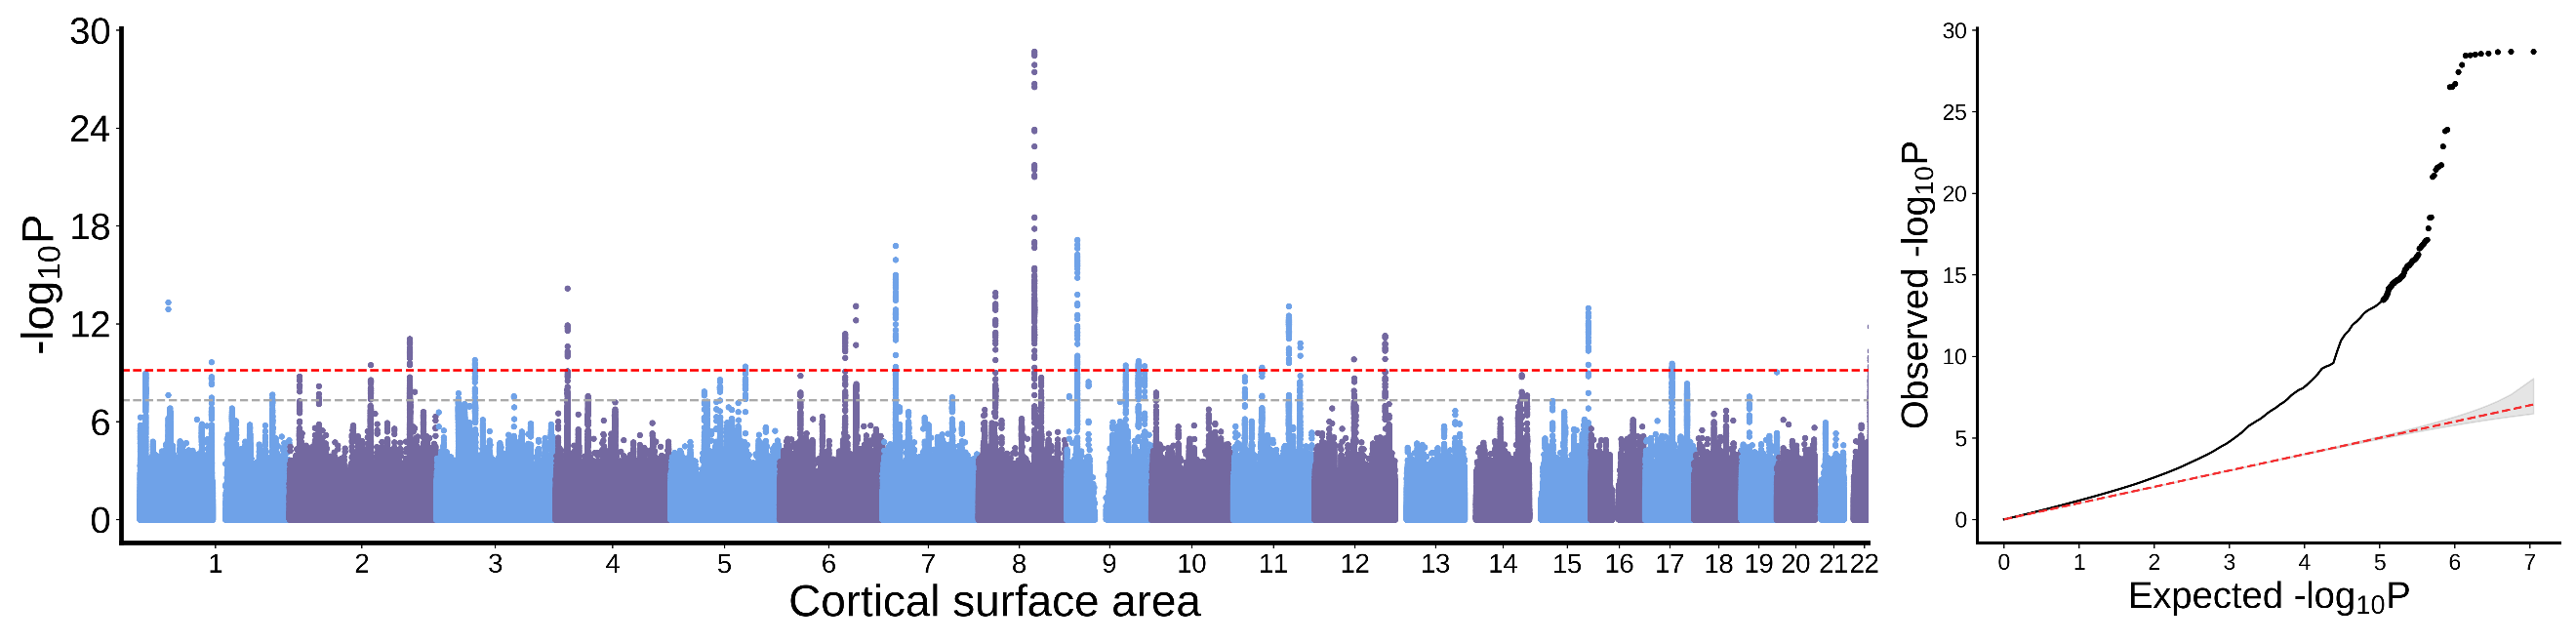


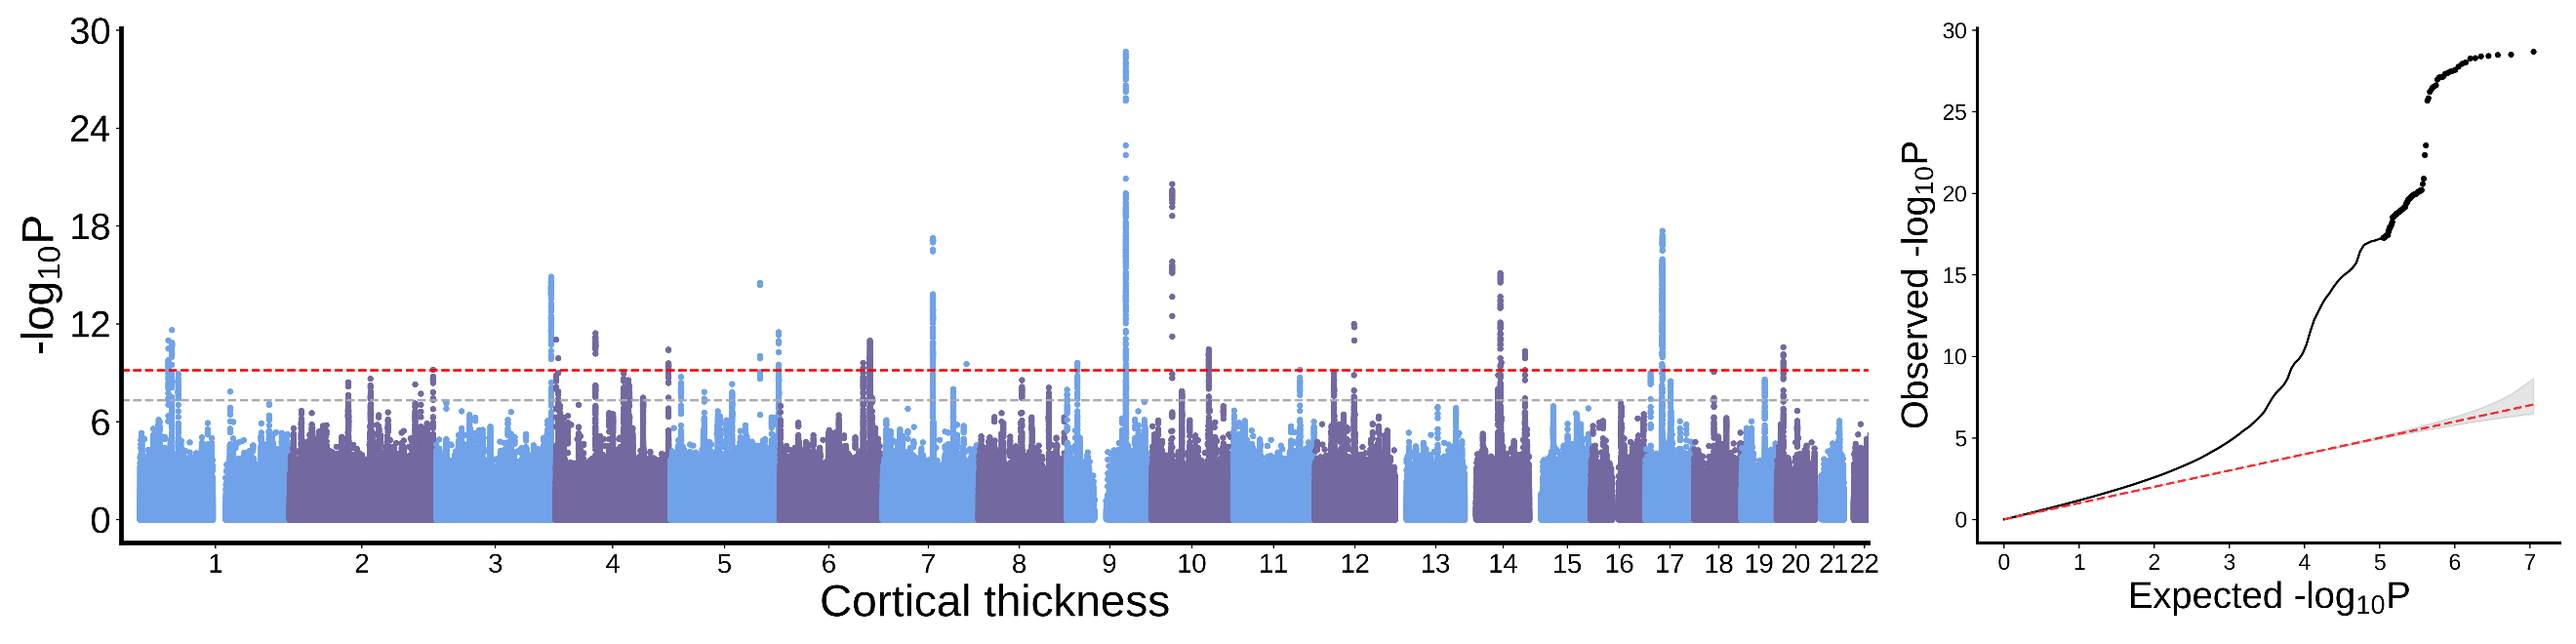


Fusiform cortex


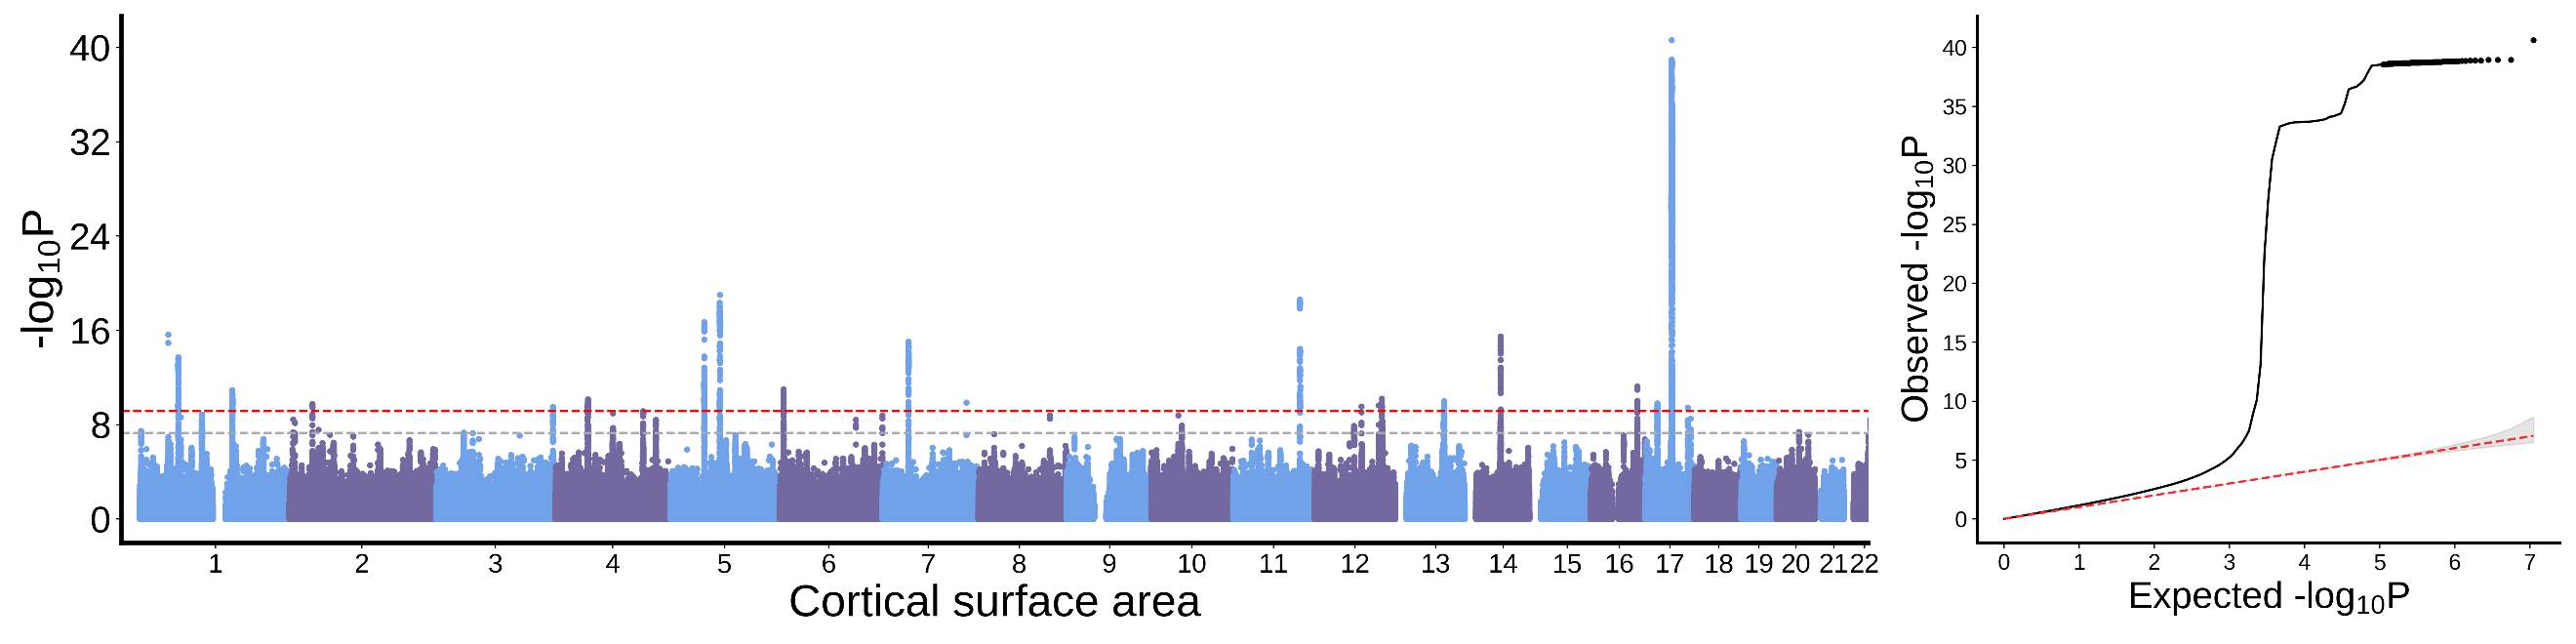


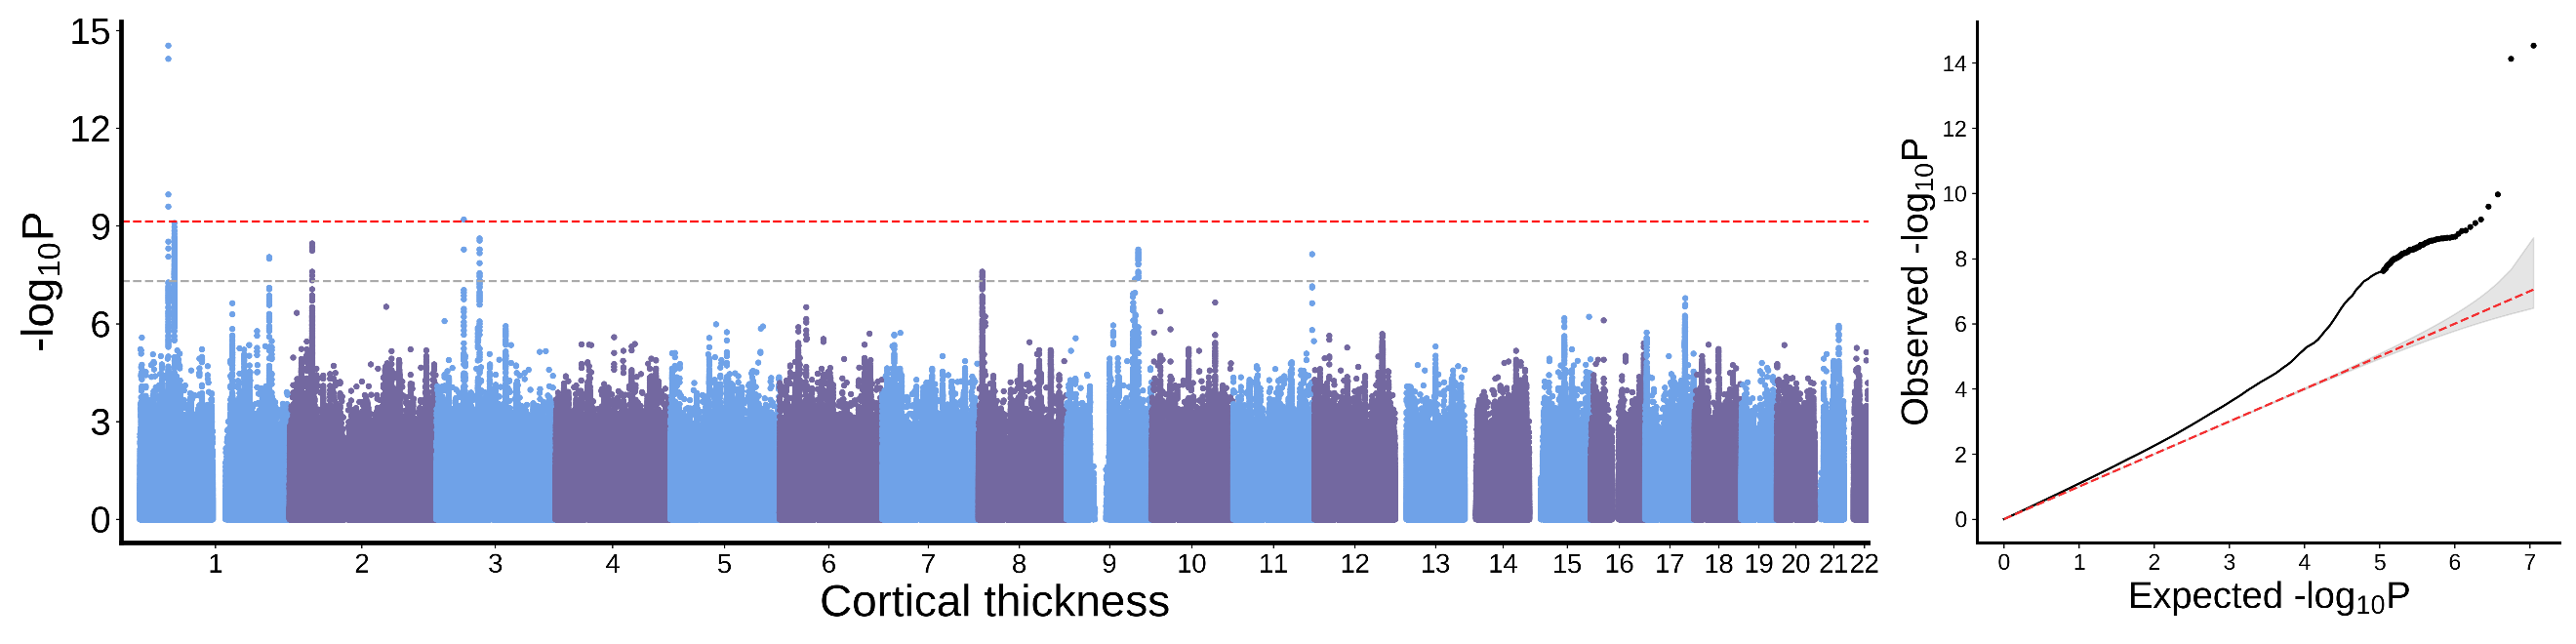


Inferior temporal cortex


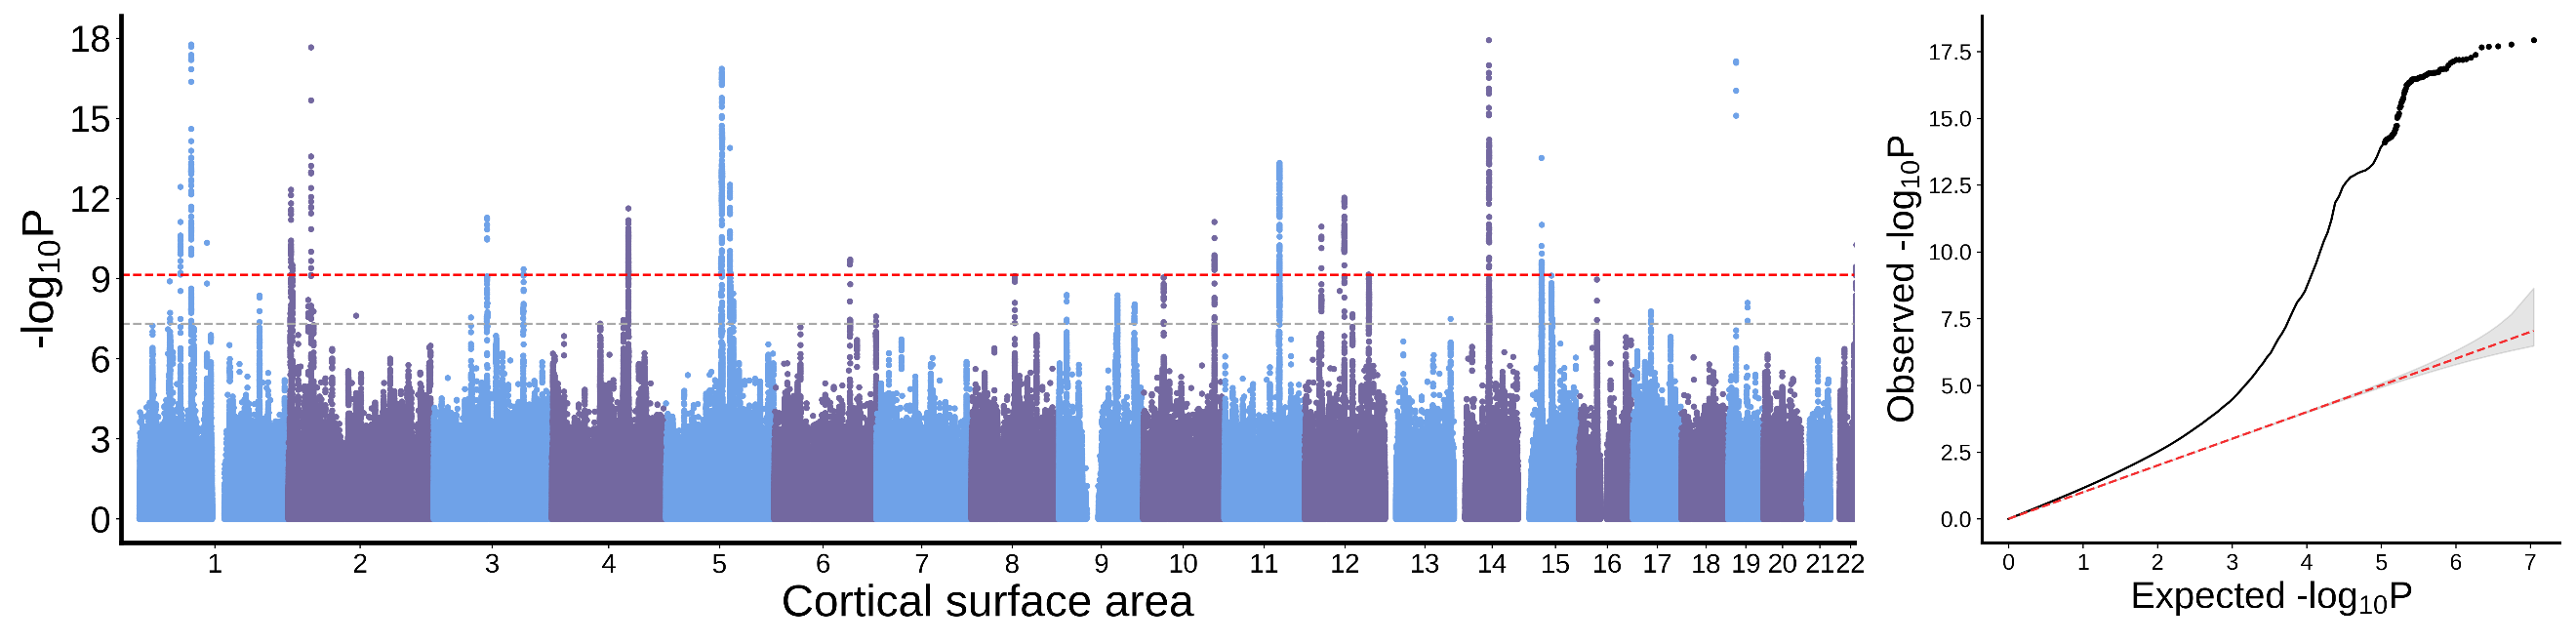


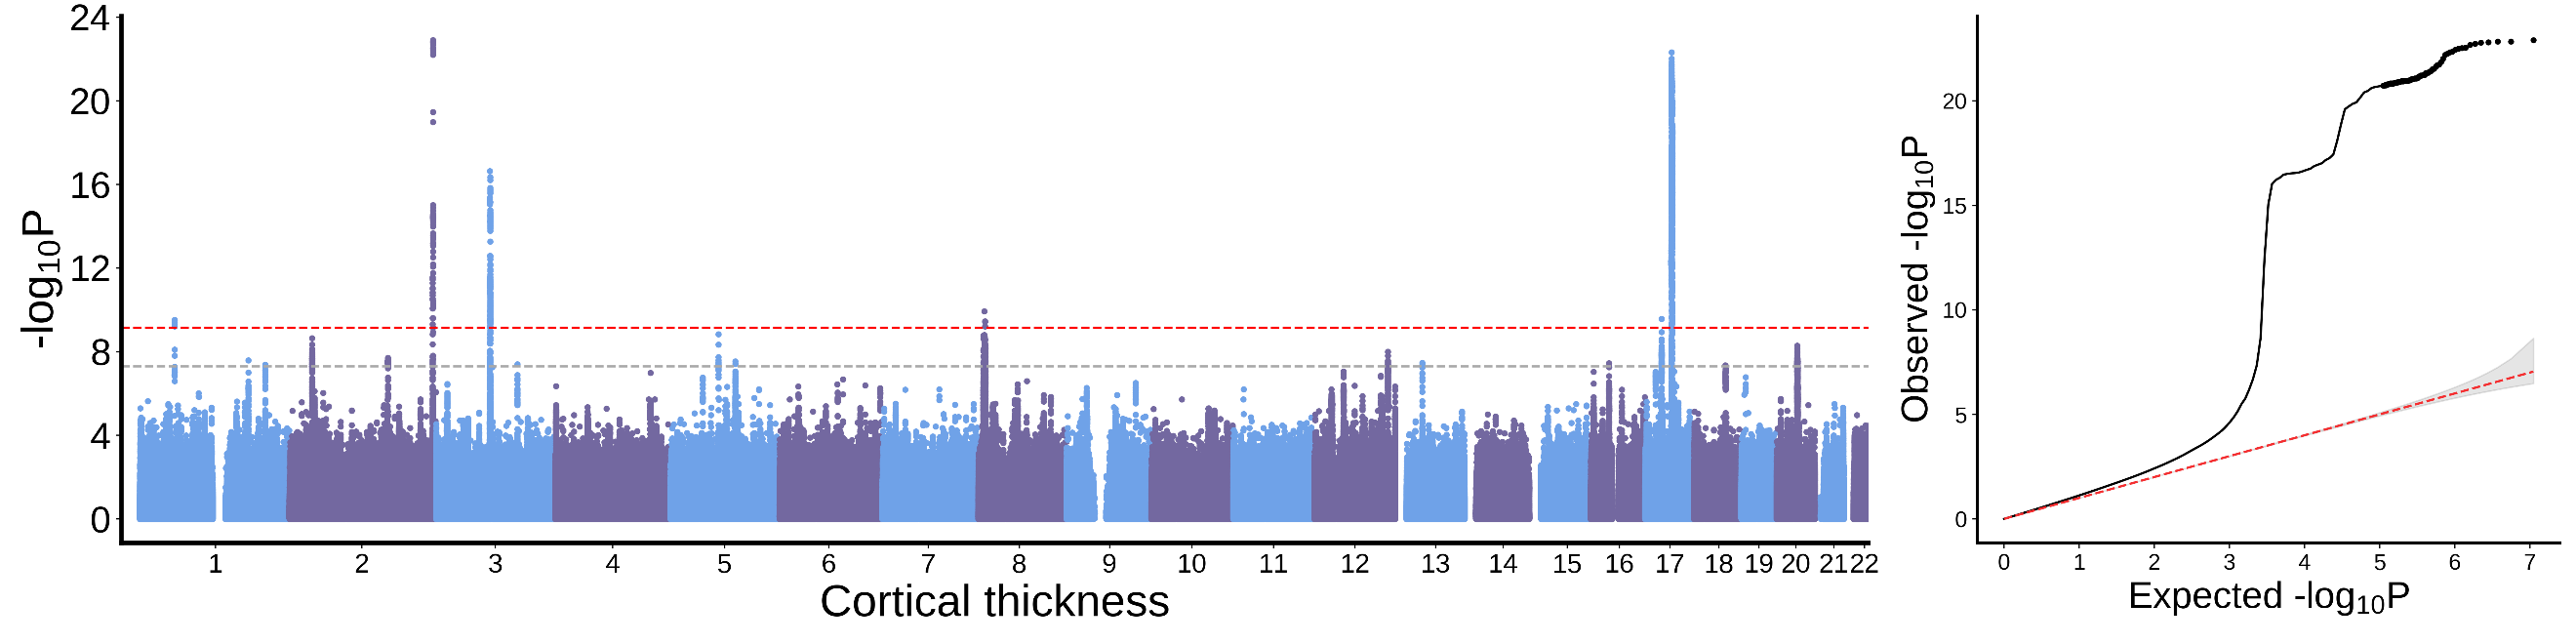


Middle temporal cortex


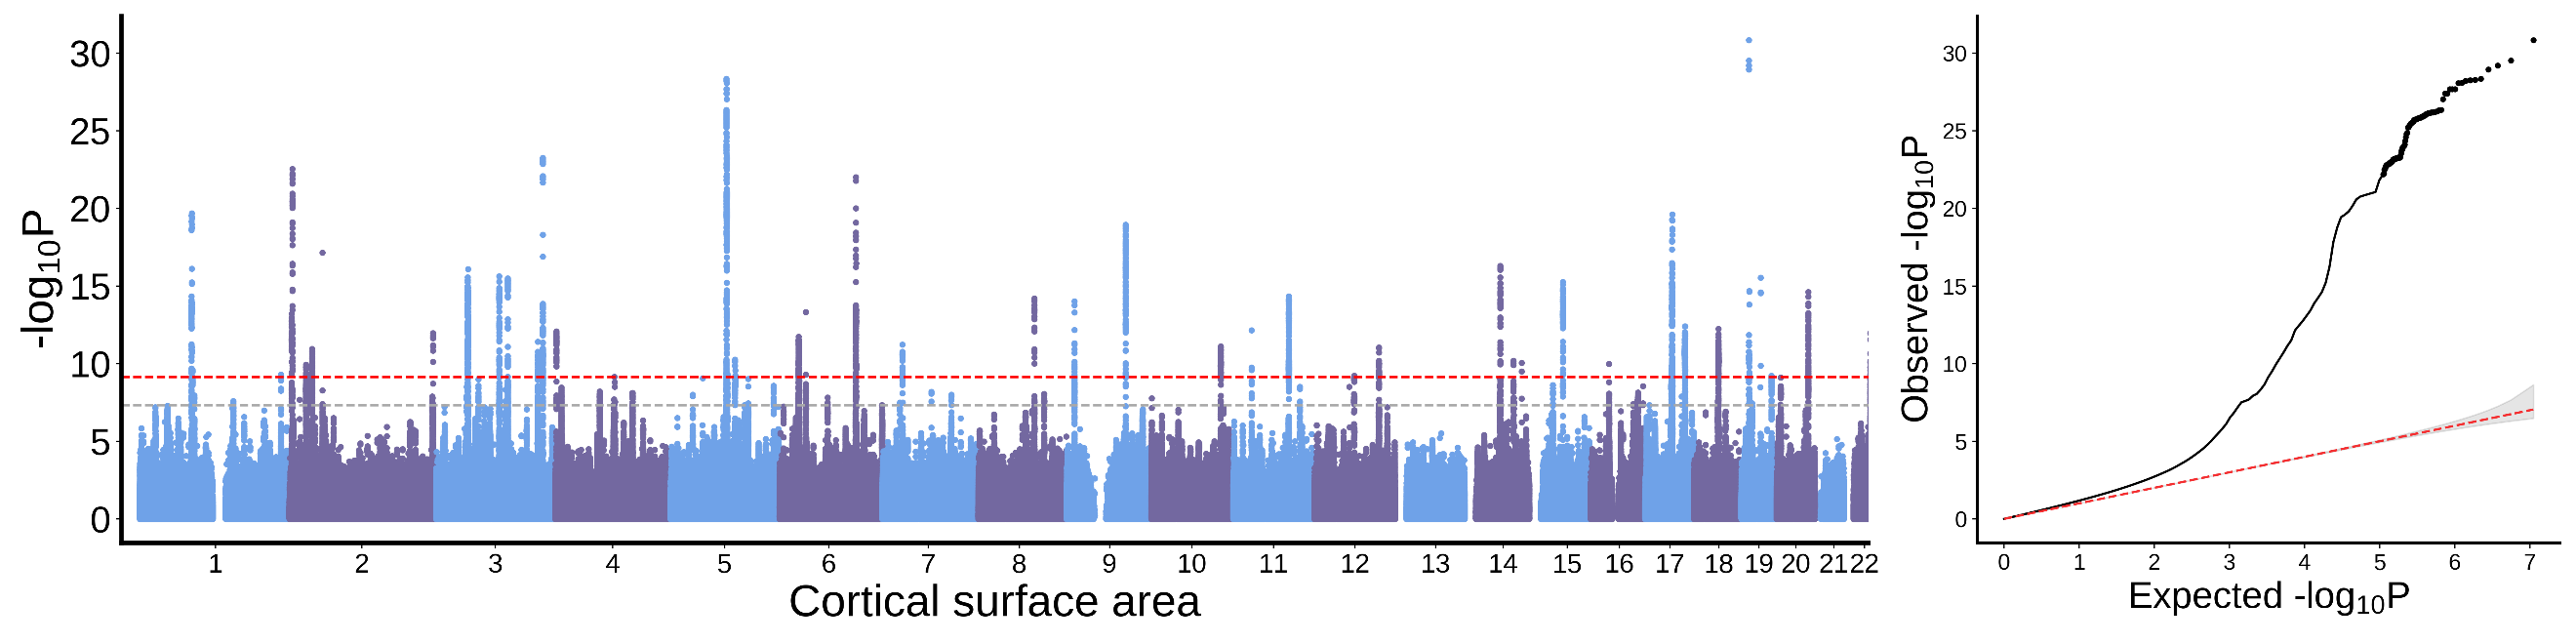


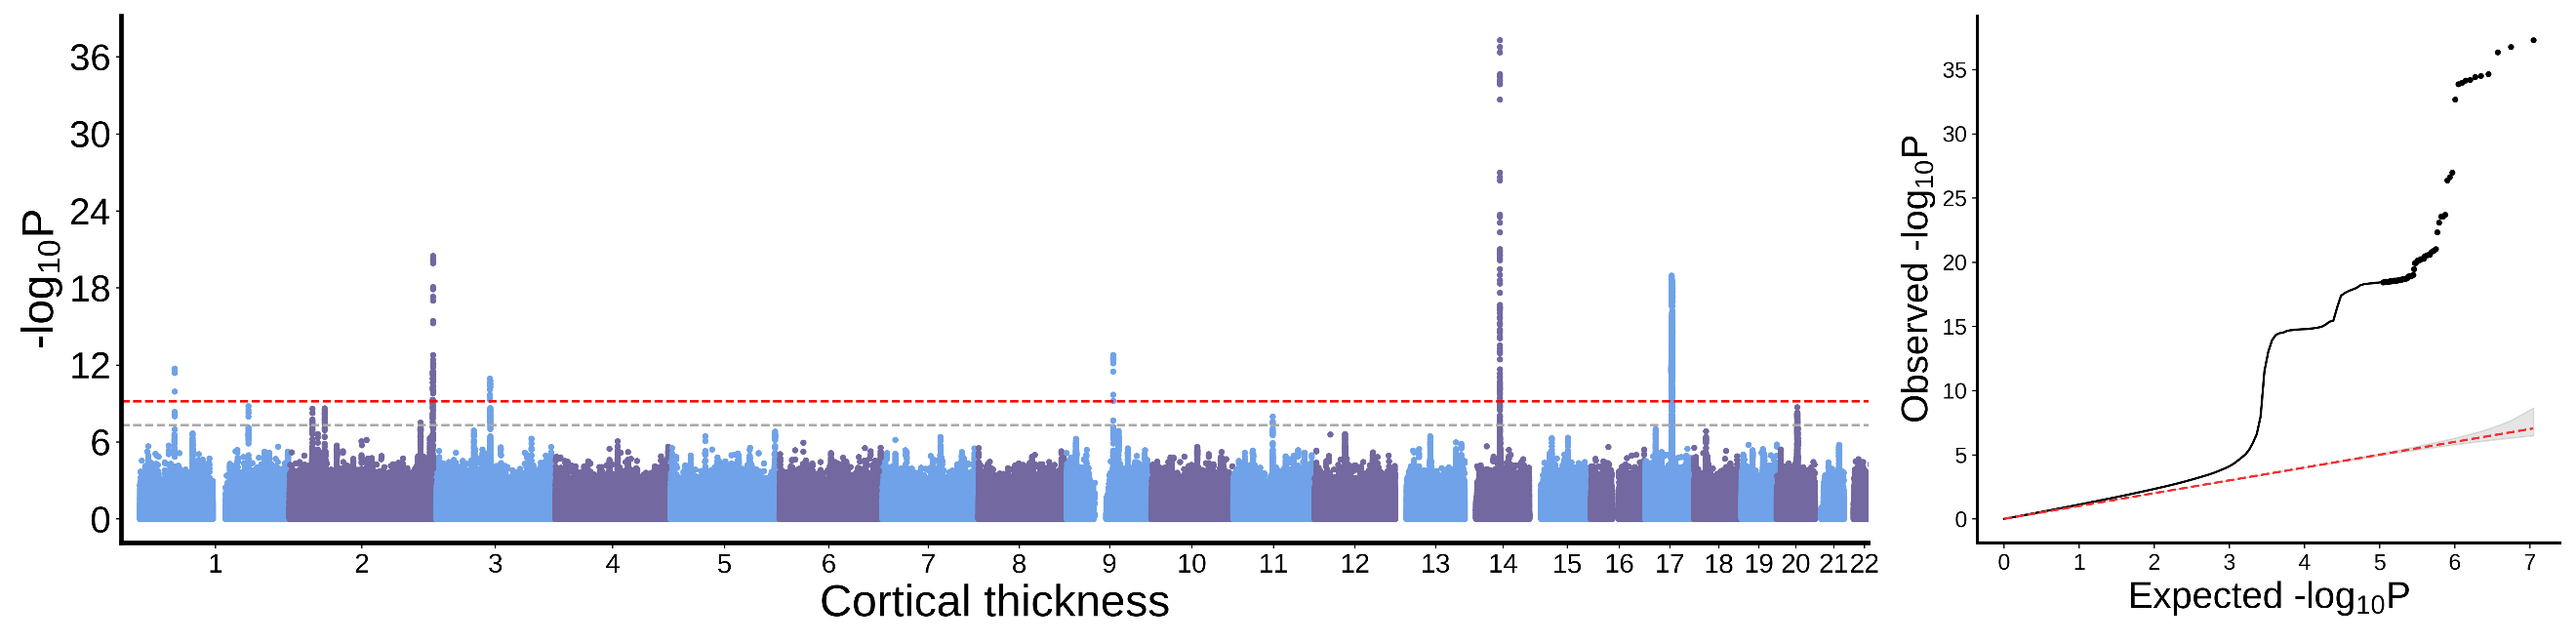


Superior temporal cortex


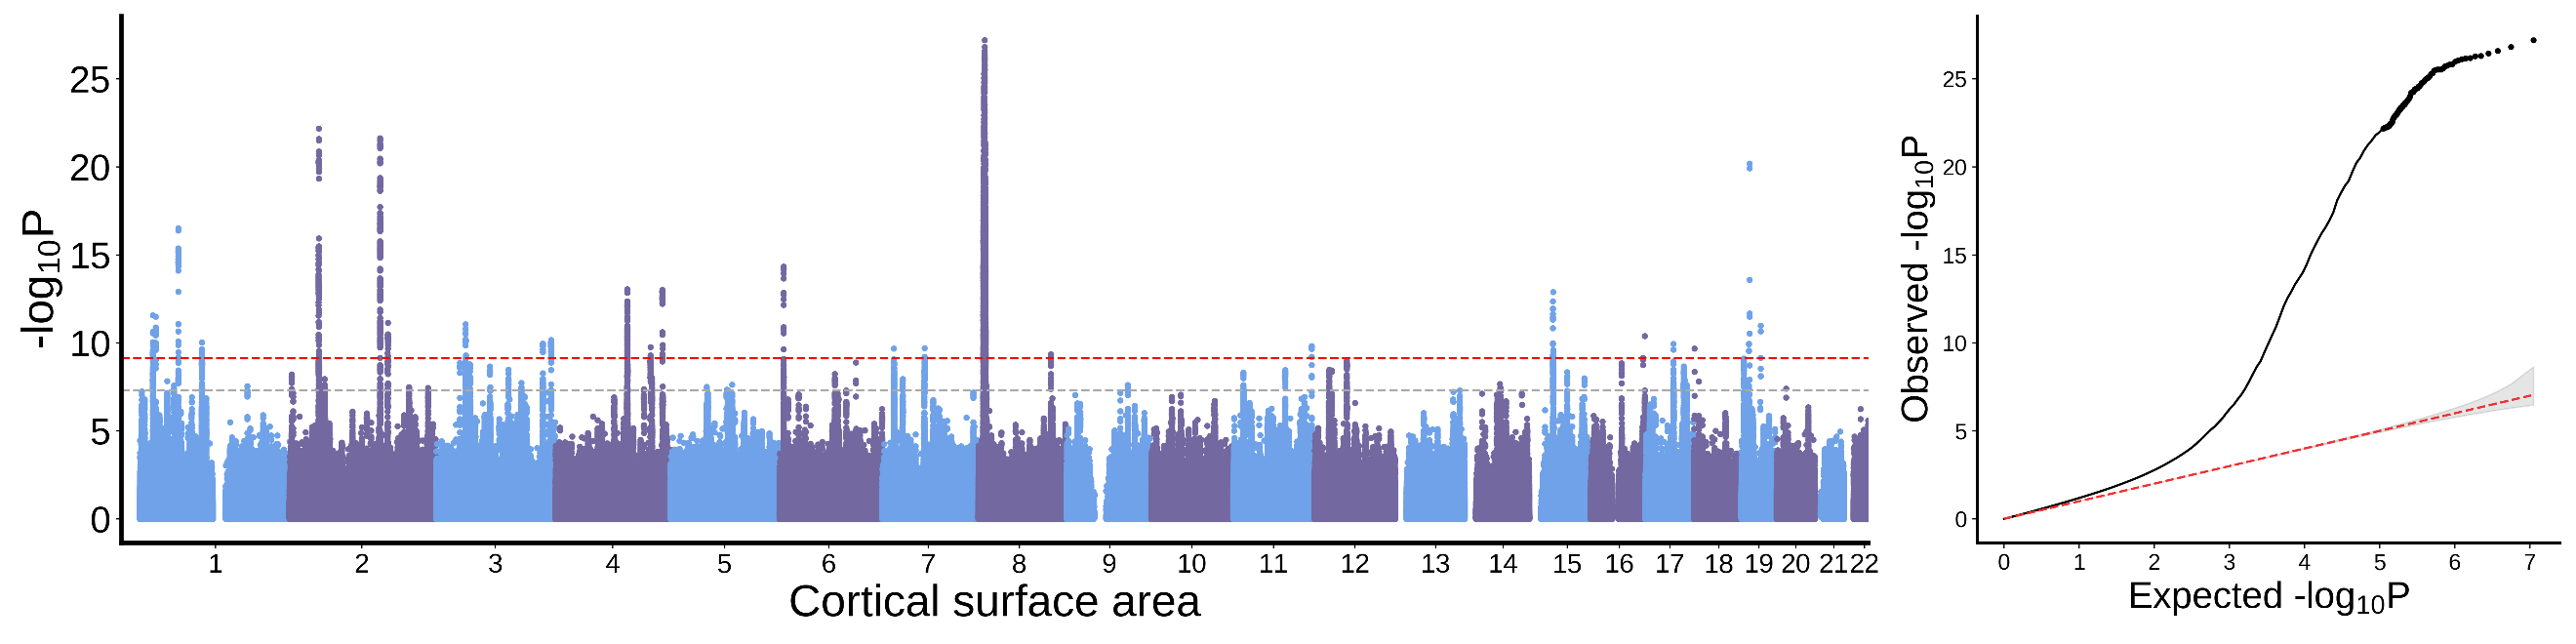


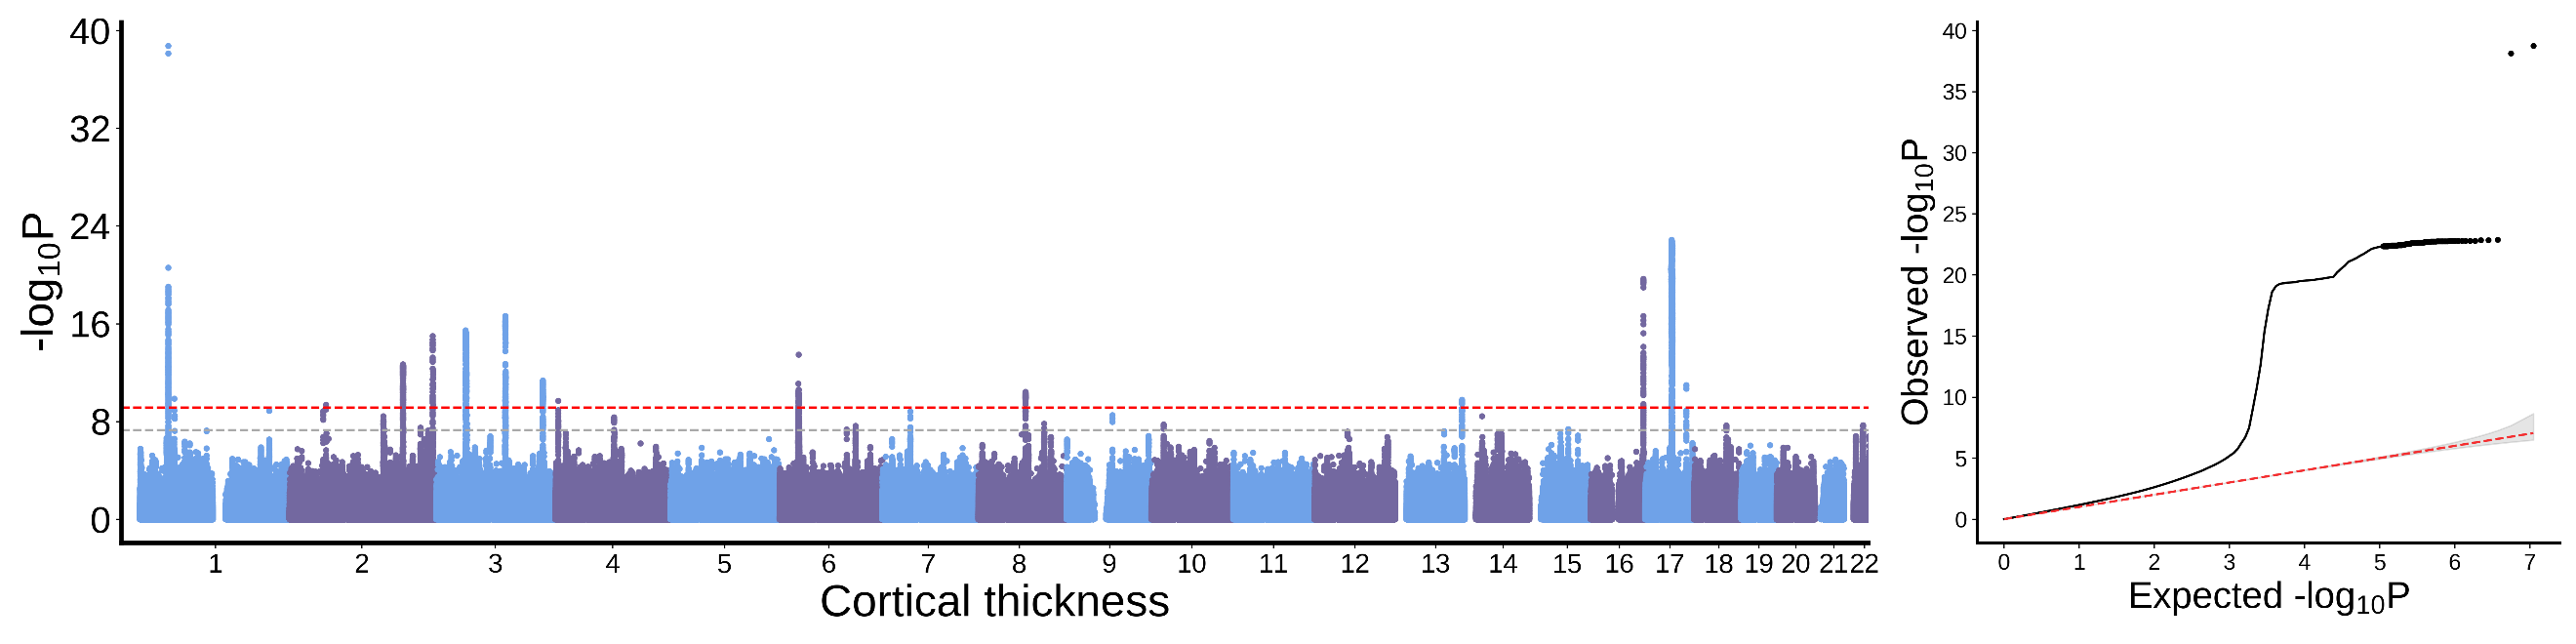


Banks of the superior temporal sulcus


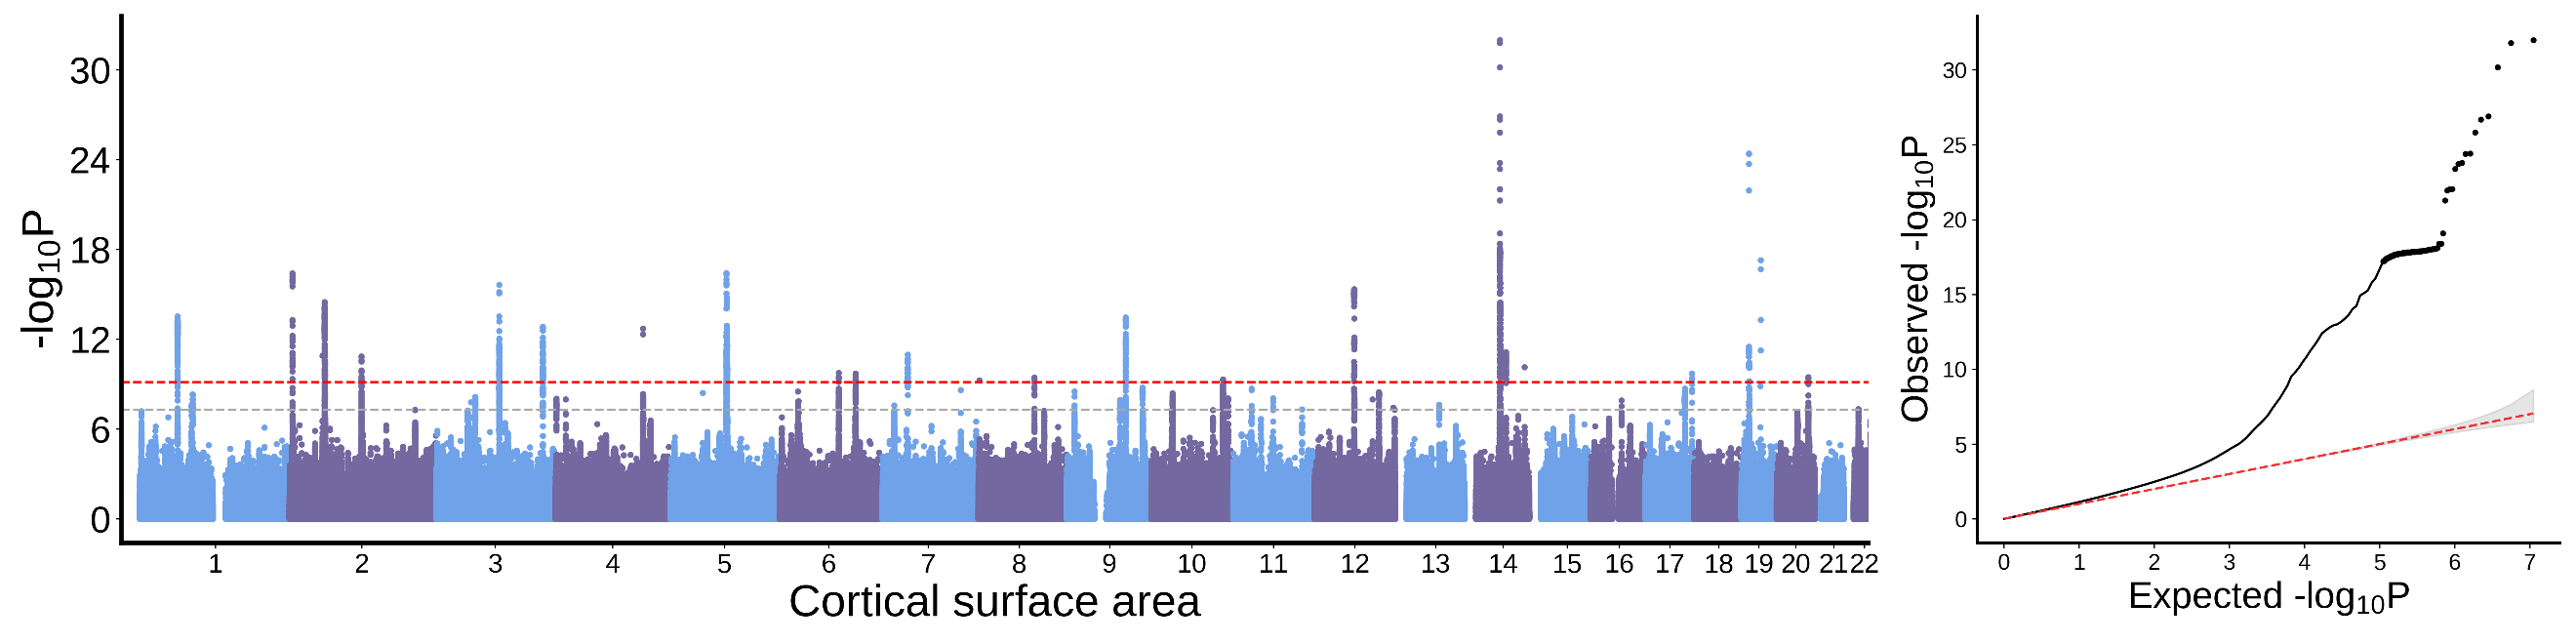


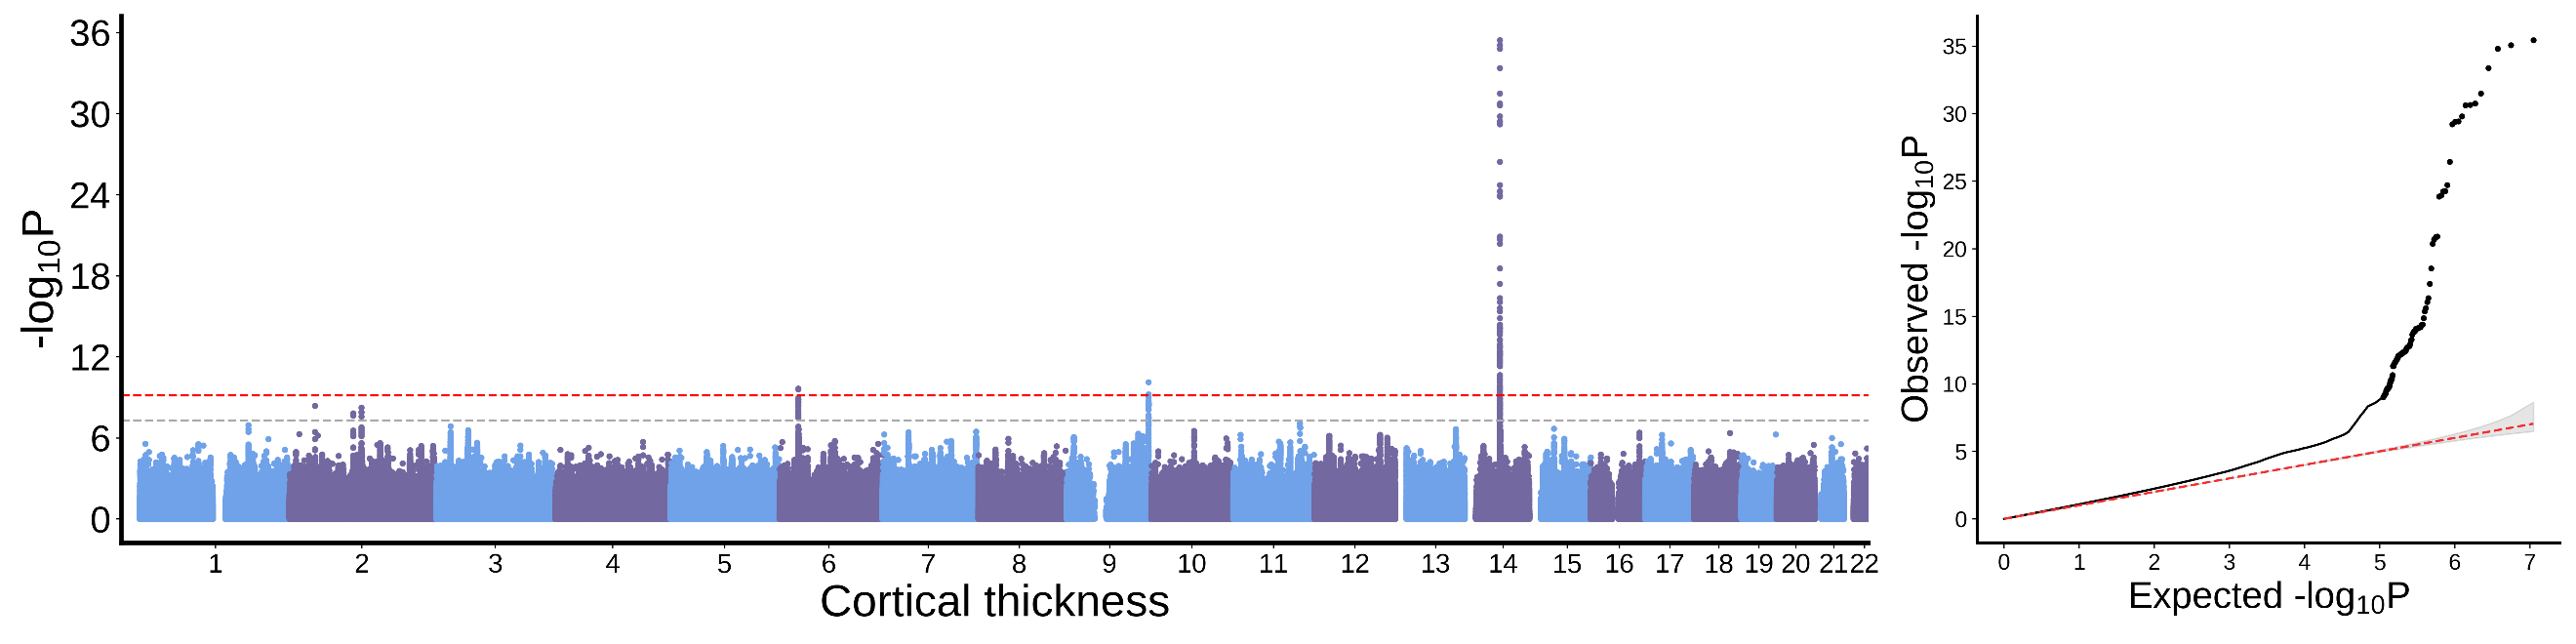


Transverse temporal cortex


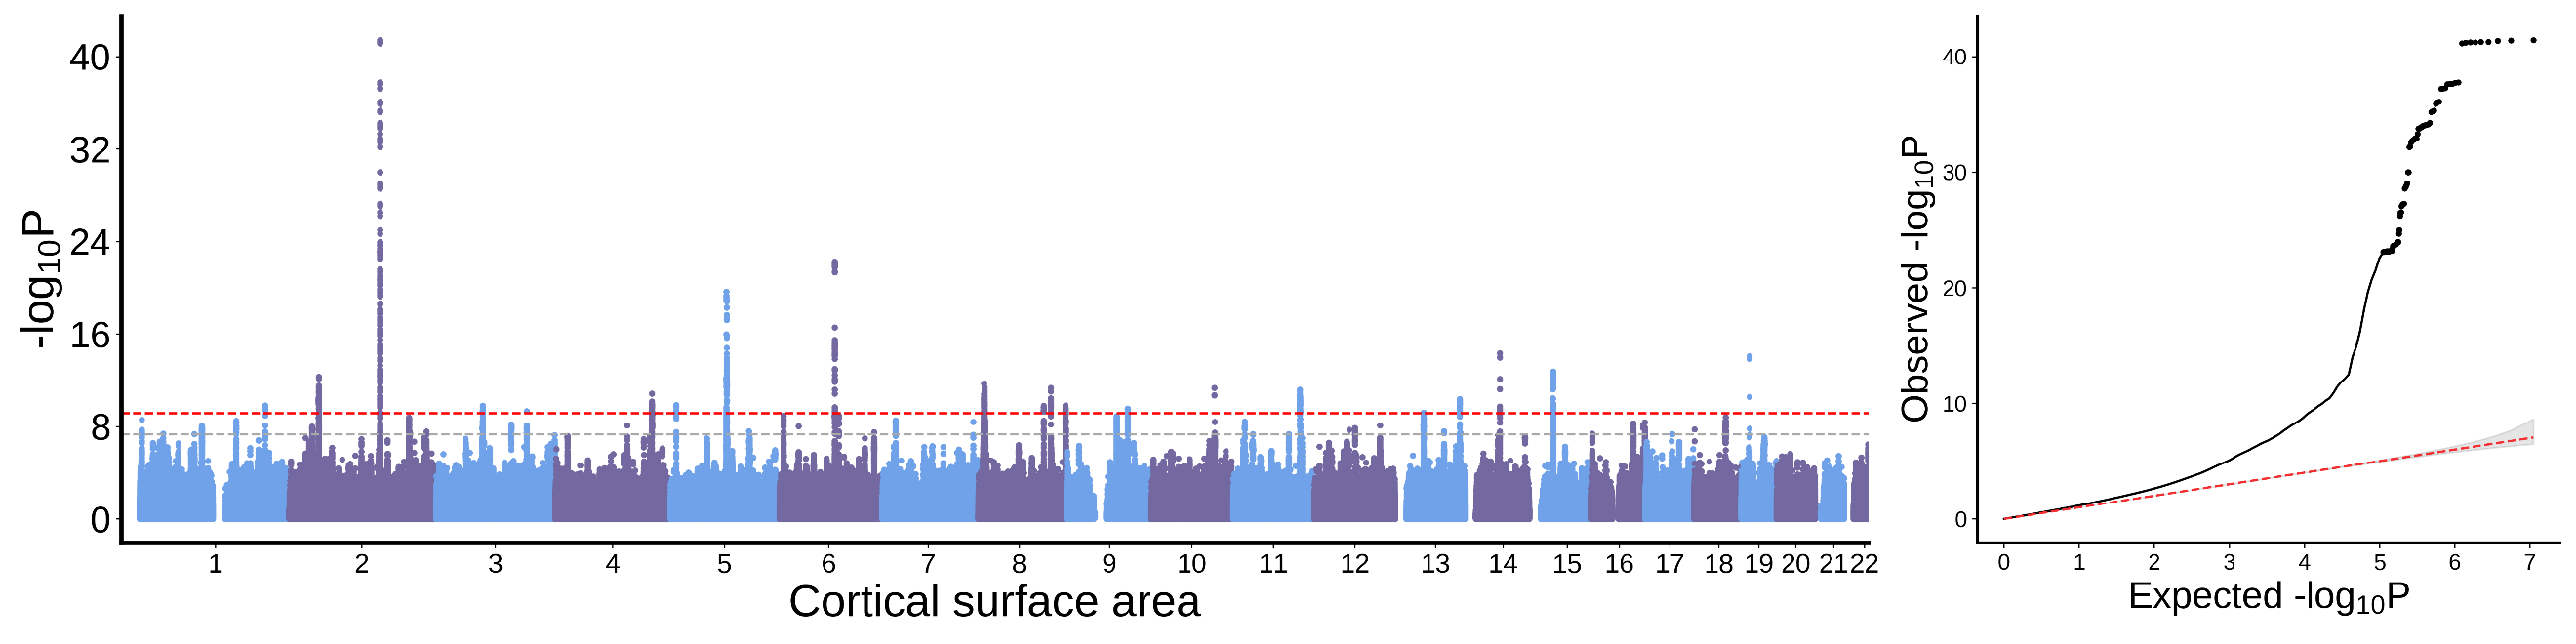


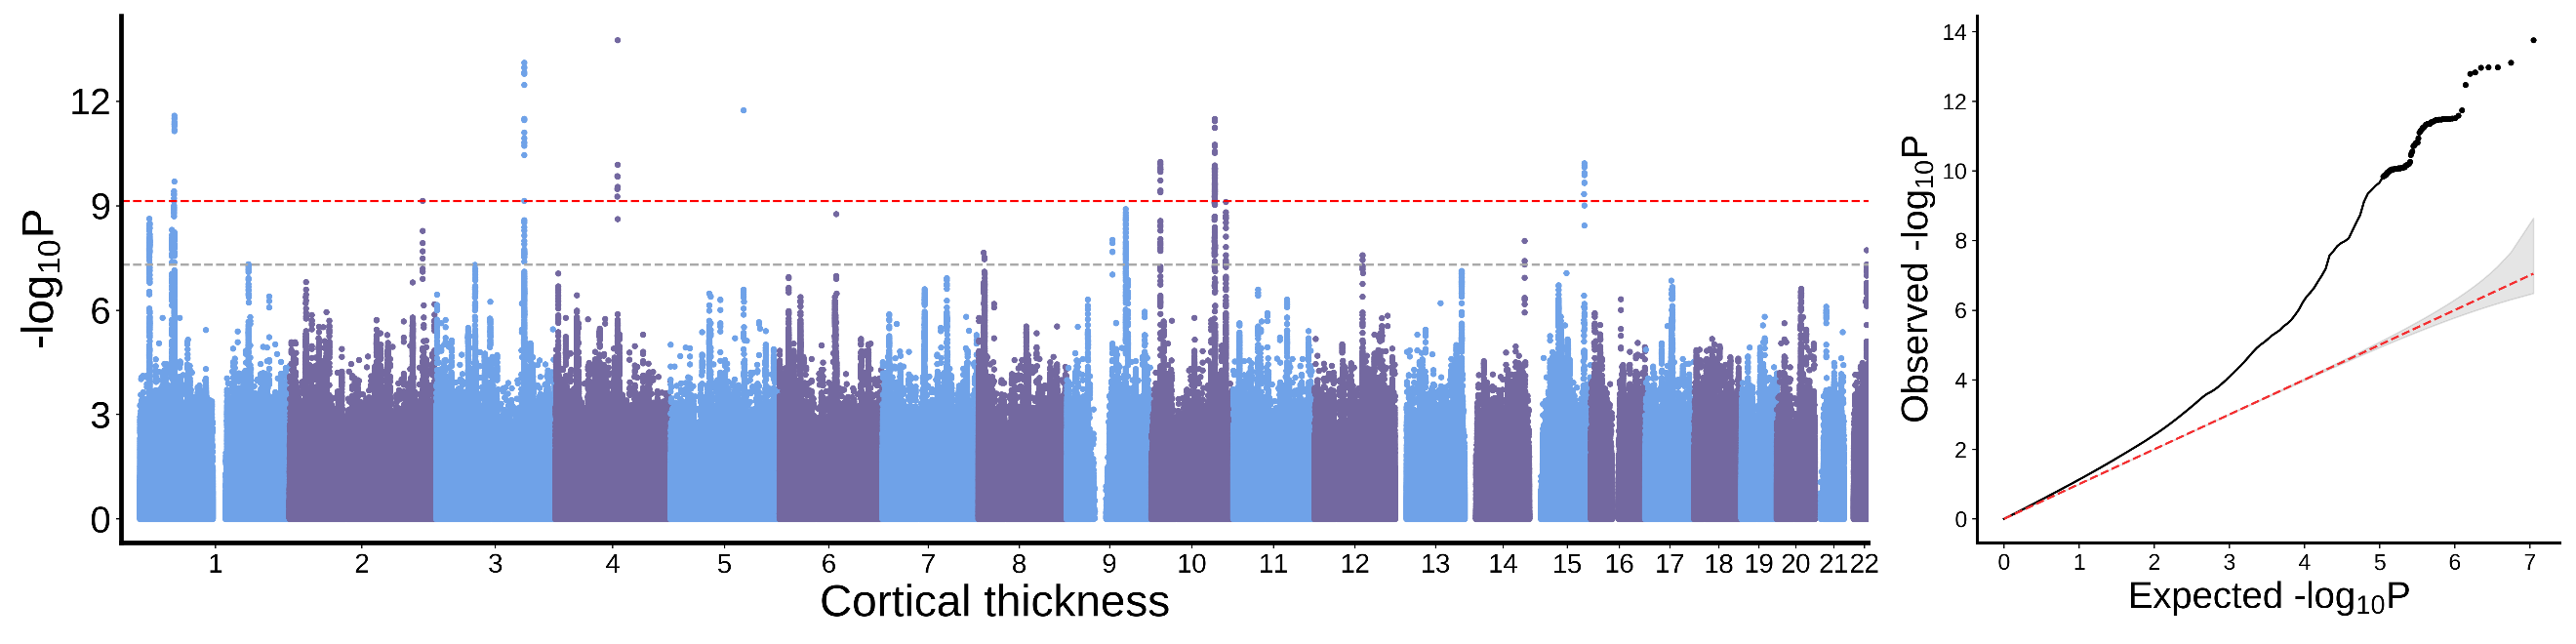


Lingual cortex


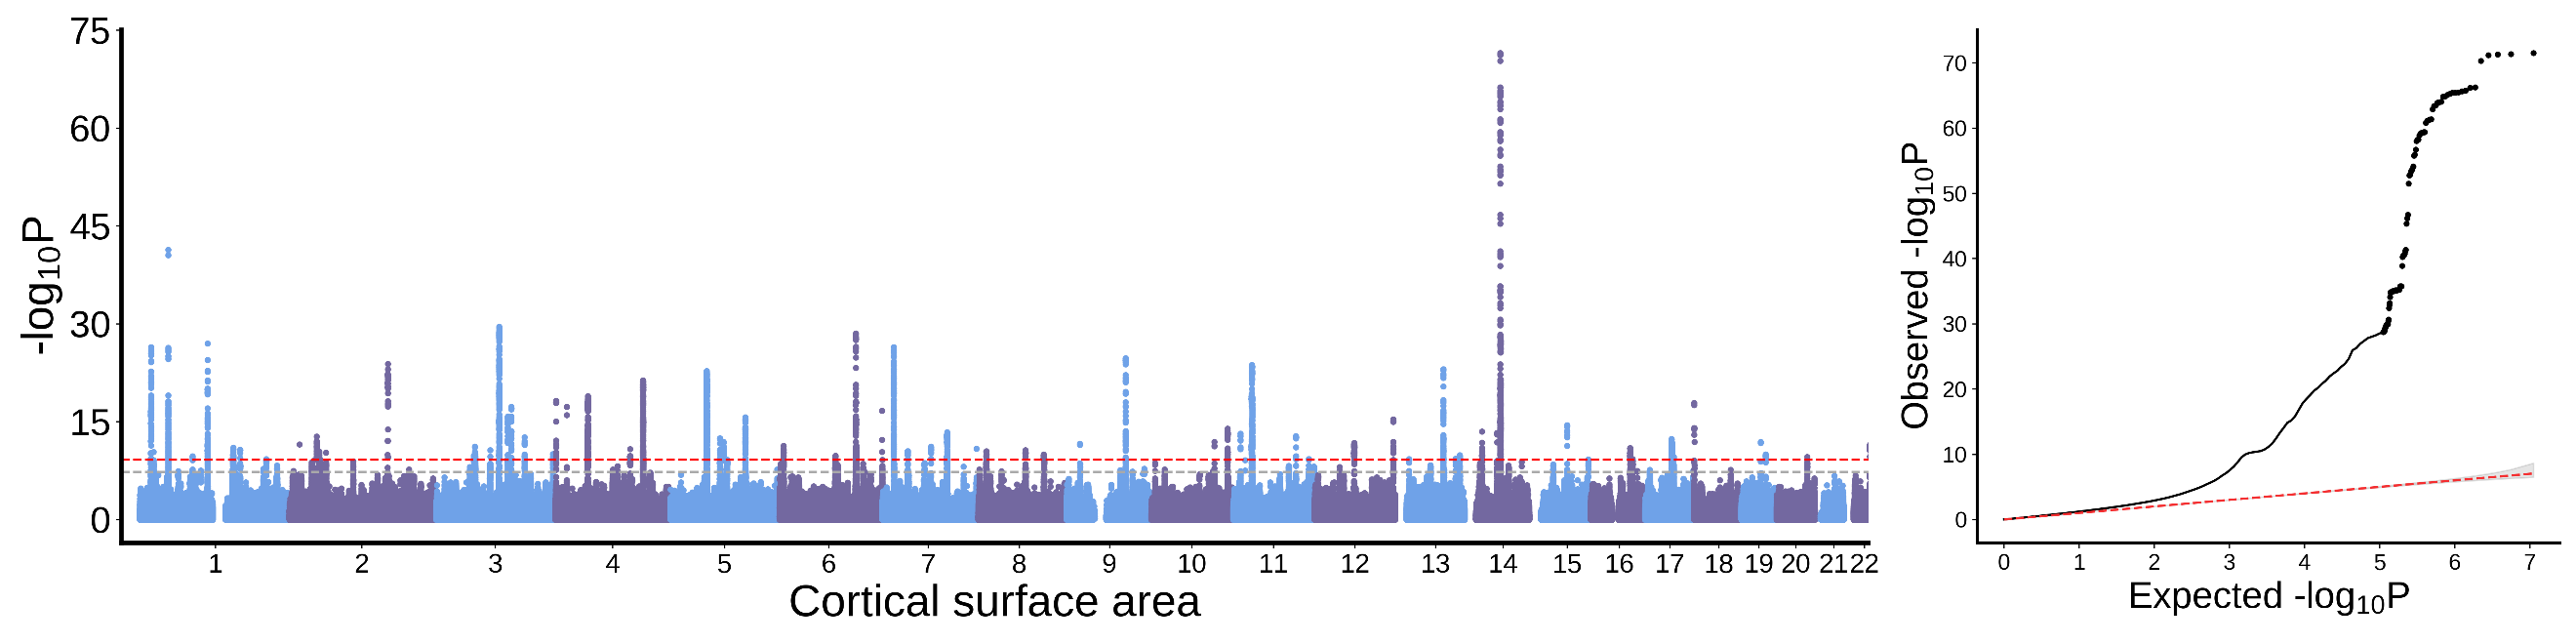


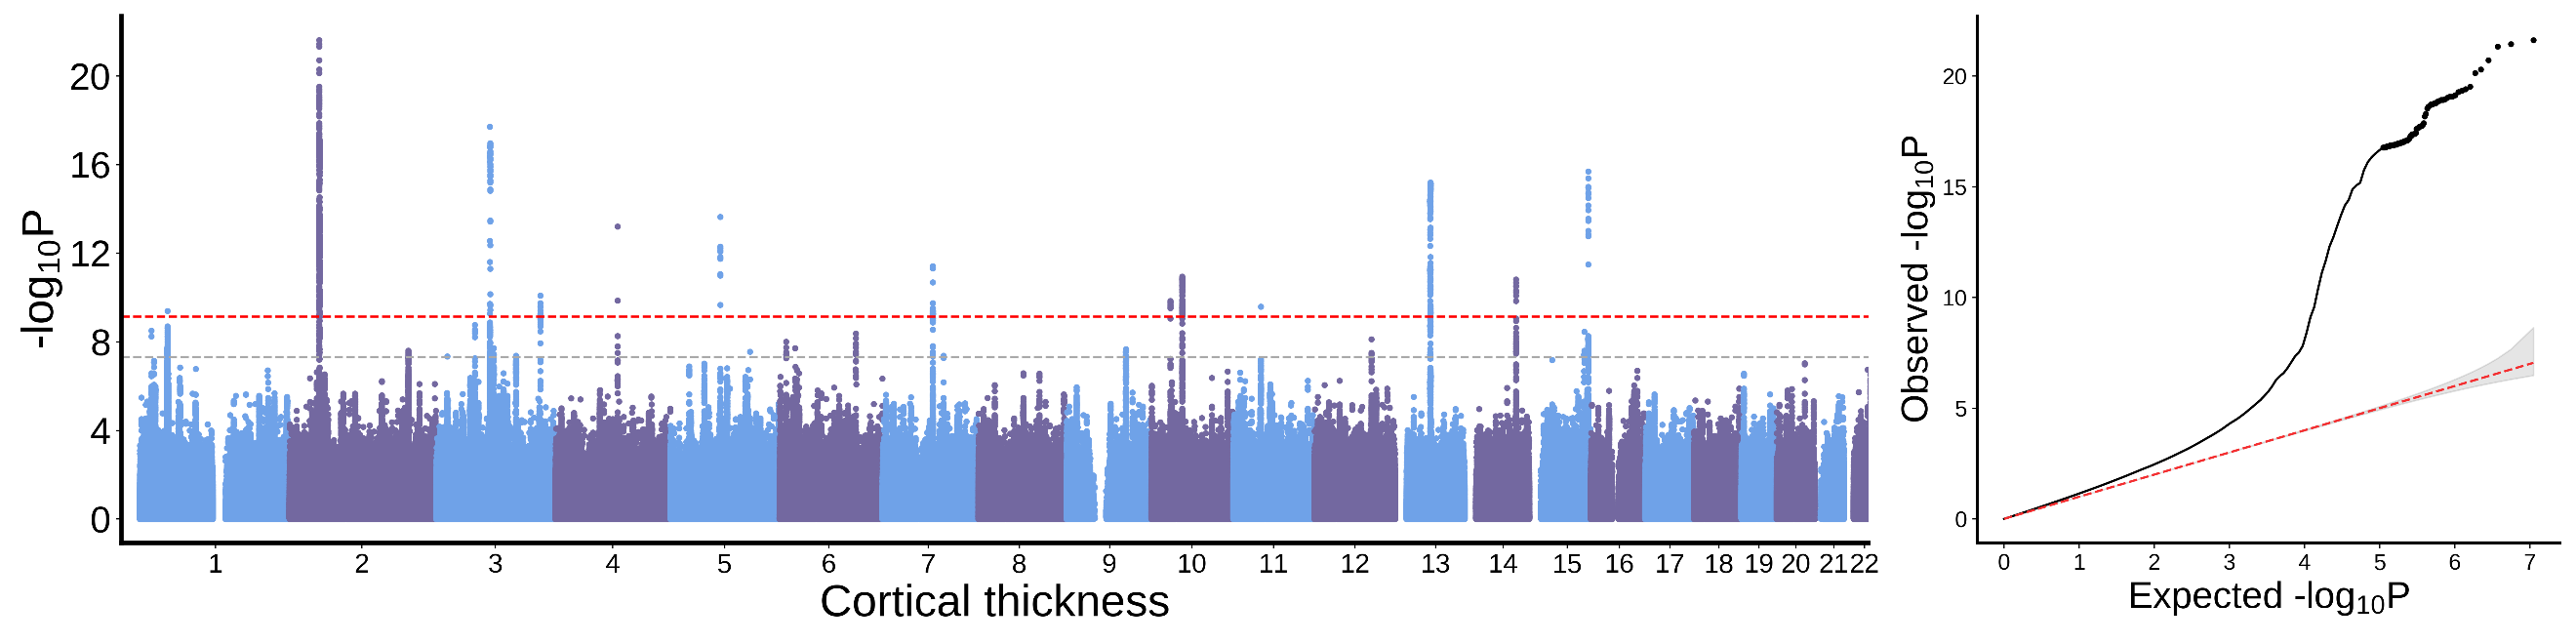


Pericalcarine cortex


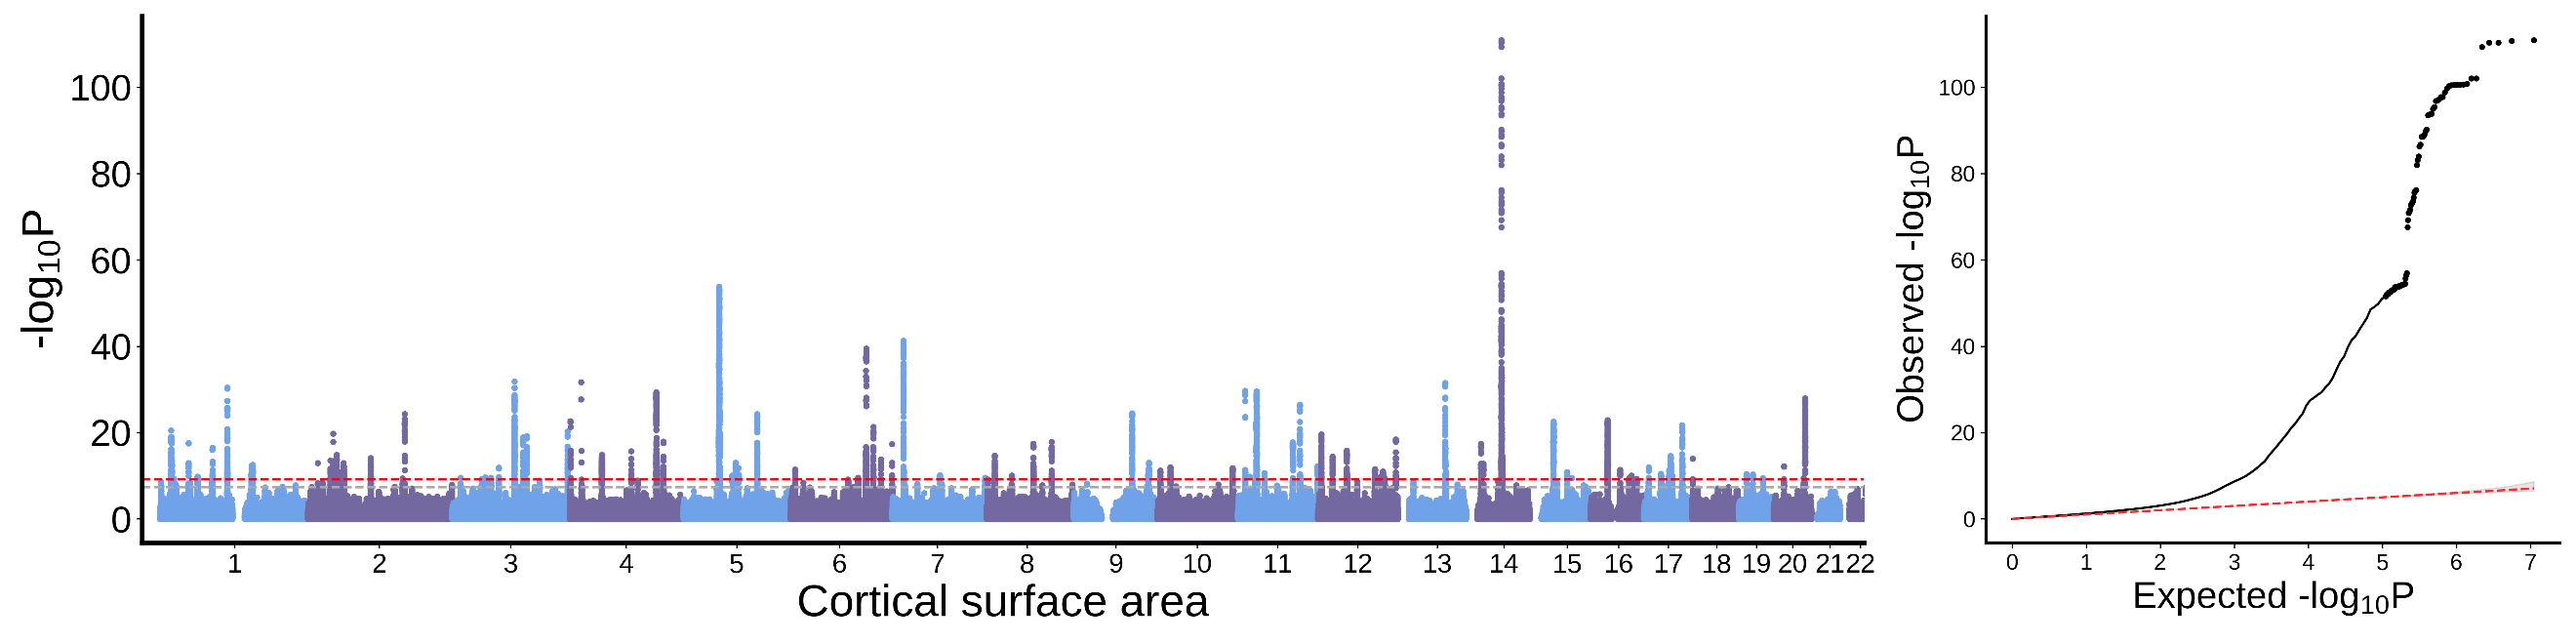


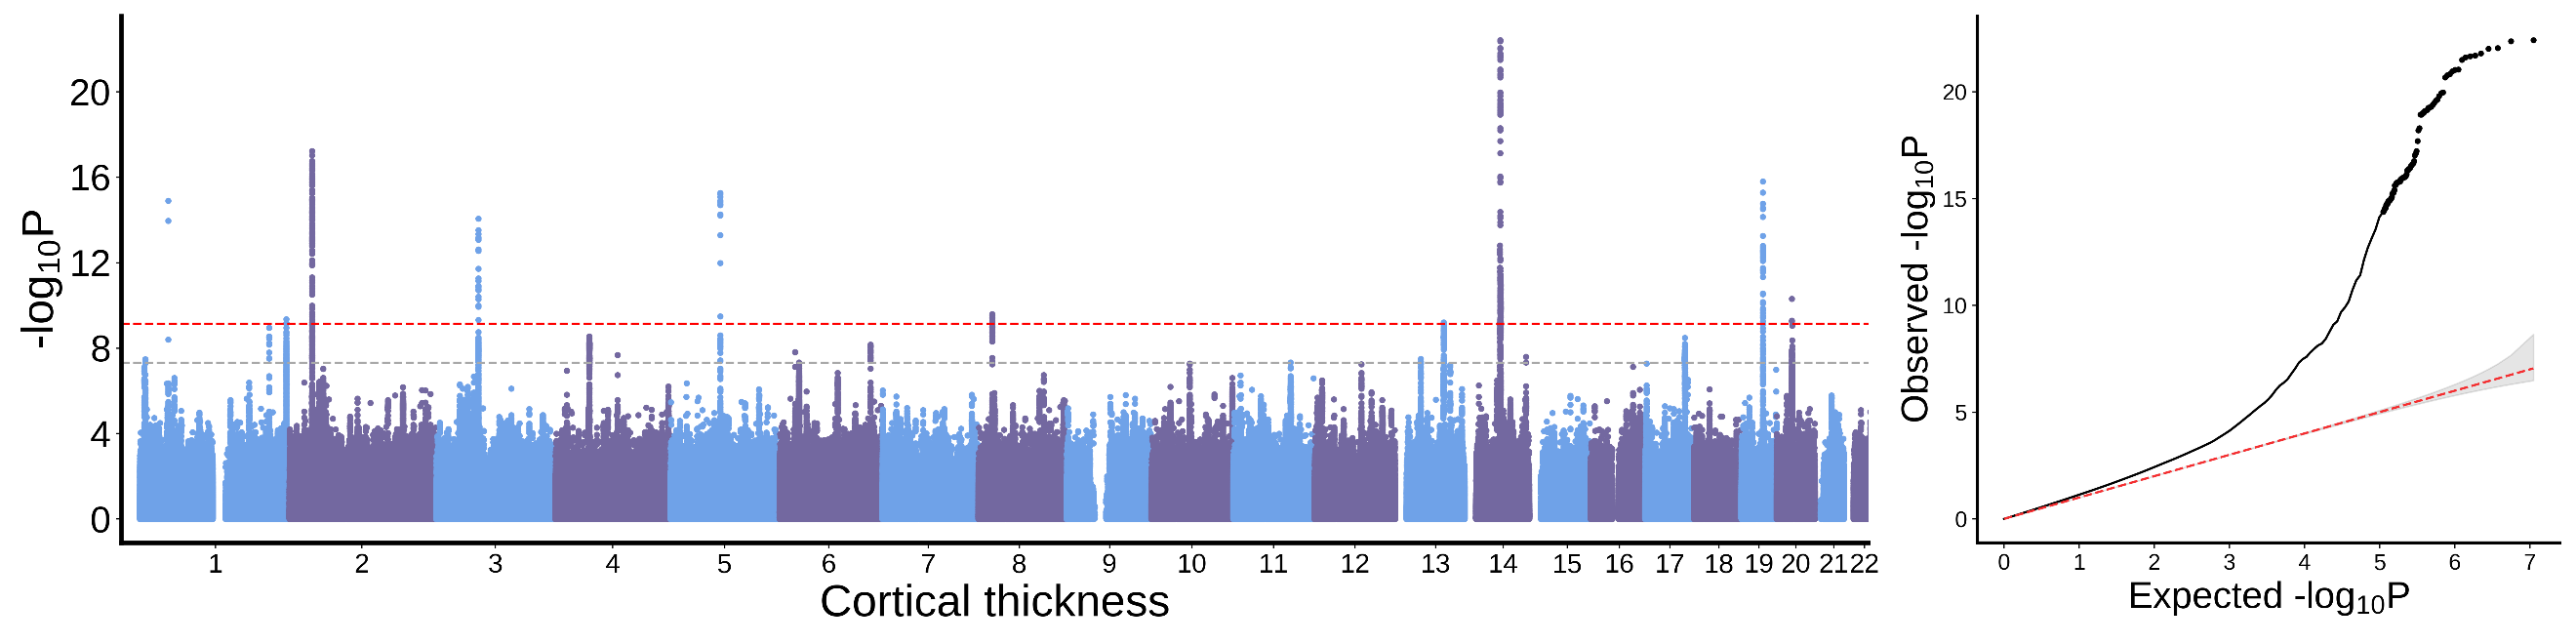


Cuneus cortex


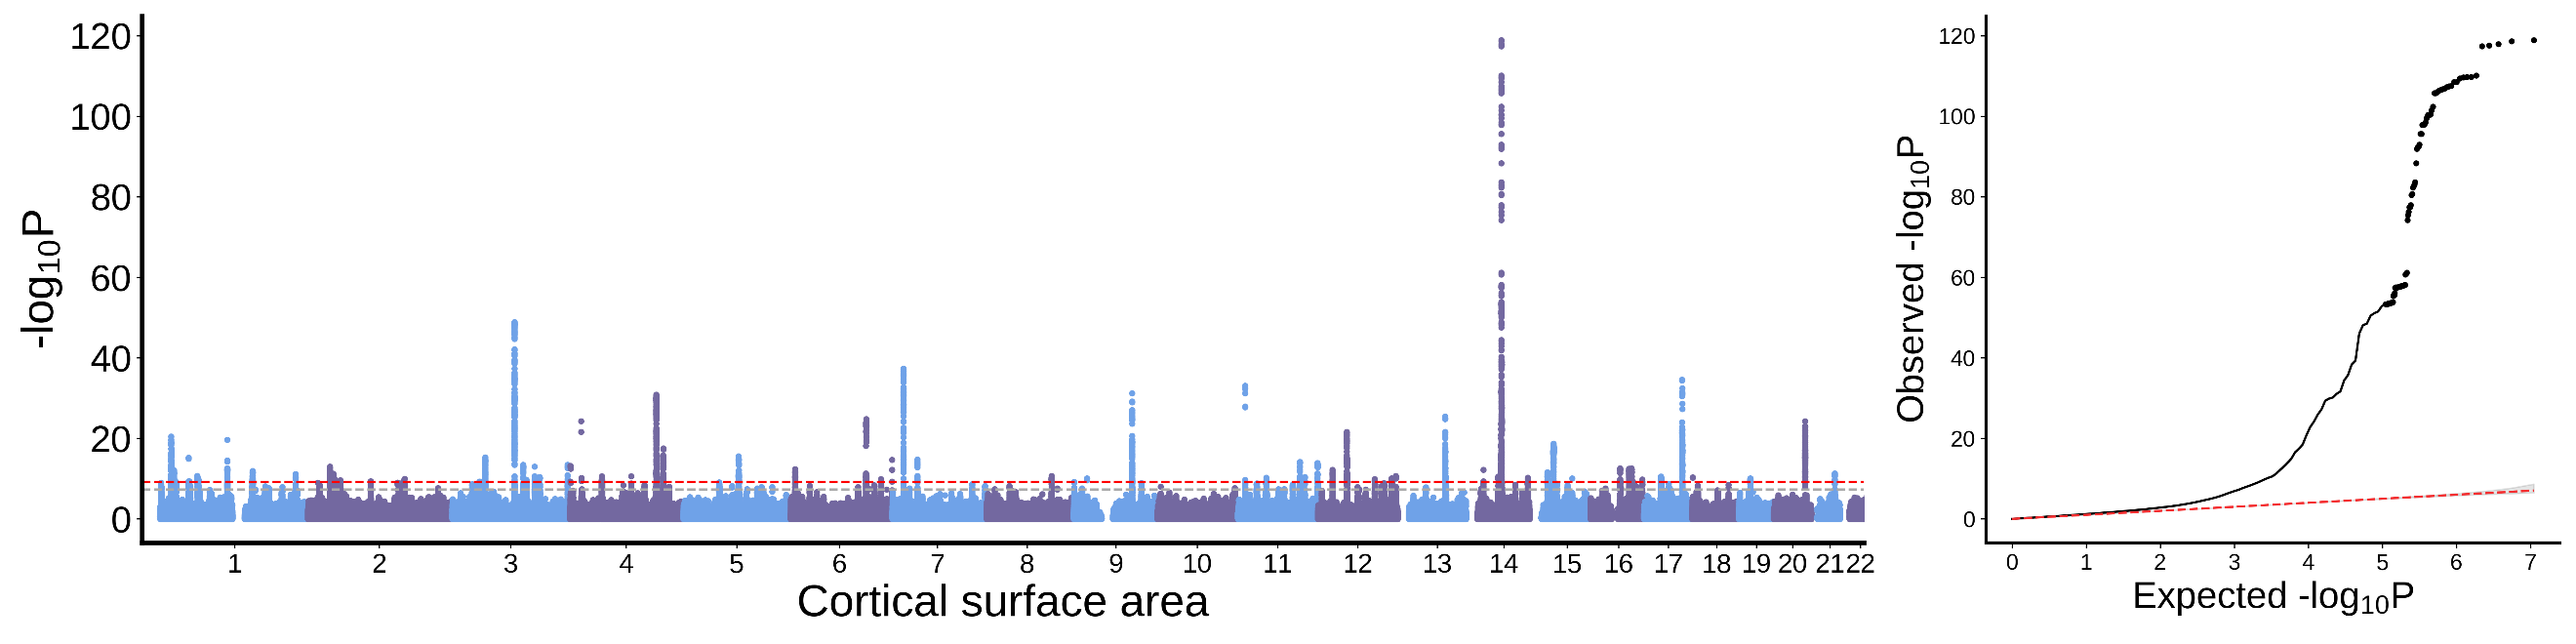


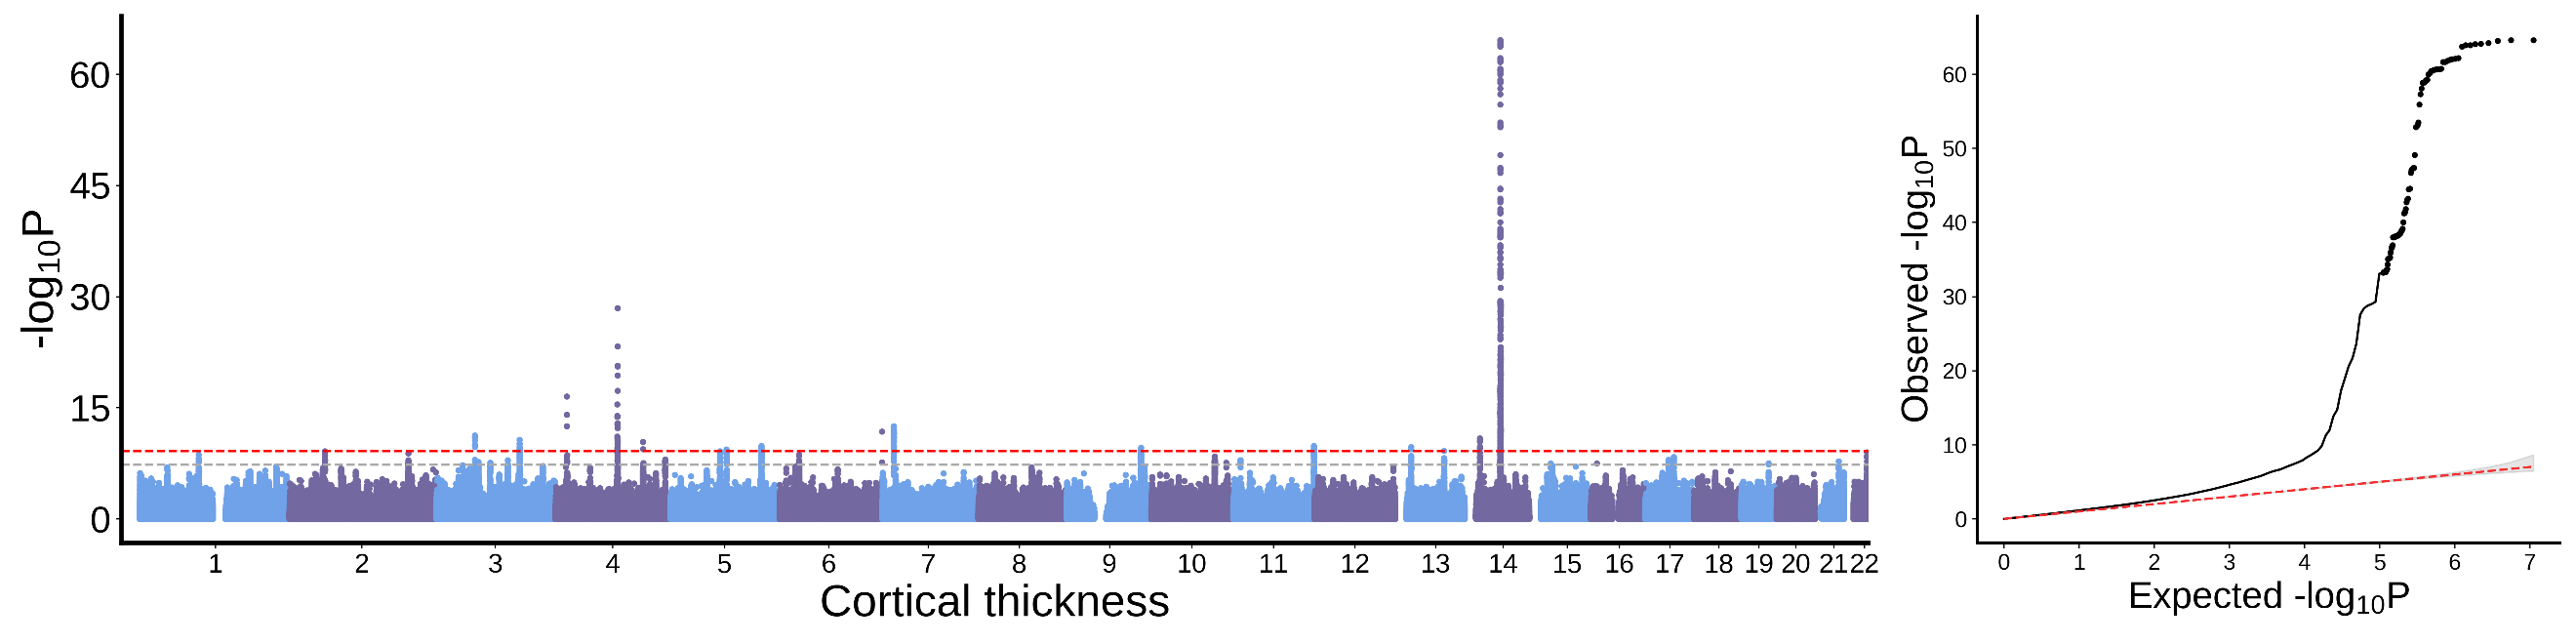


Lateral occipital cortex


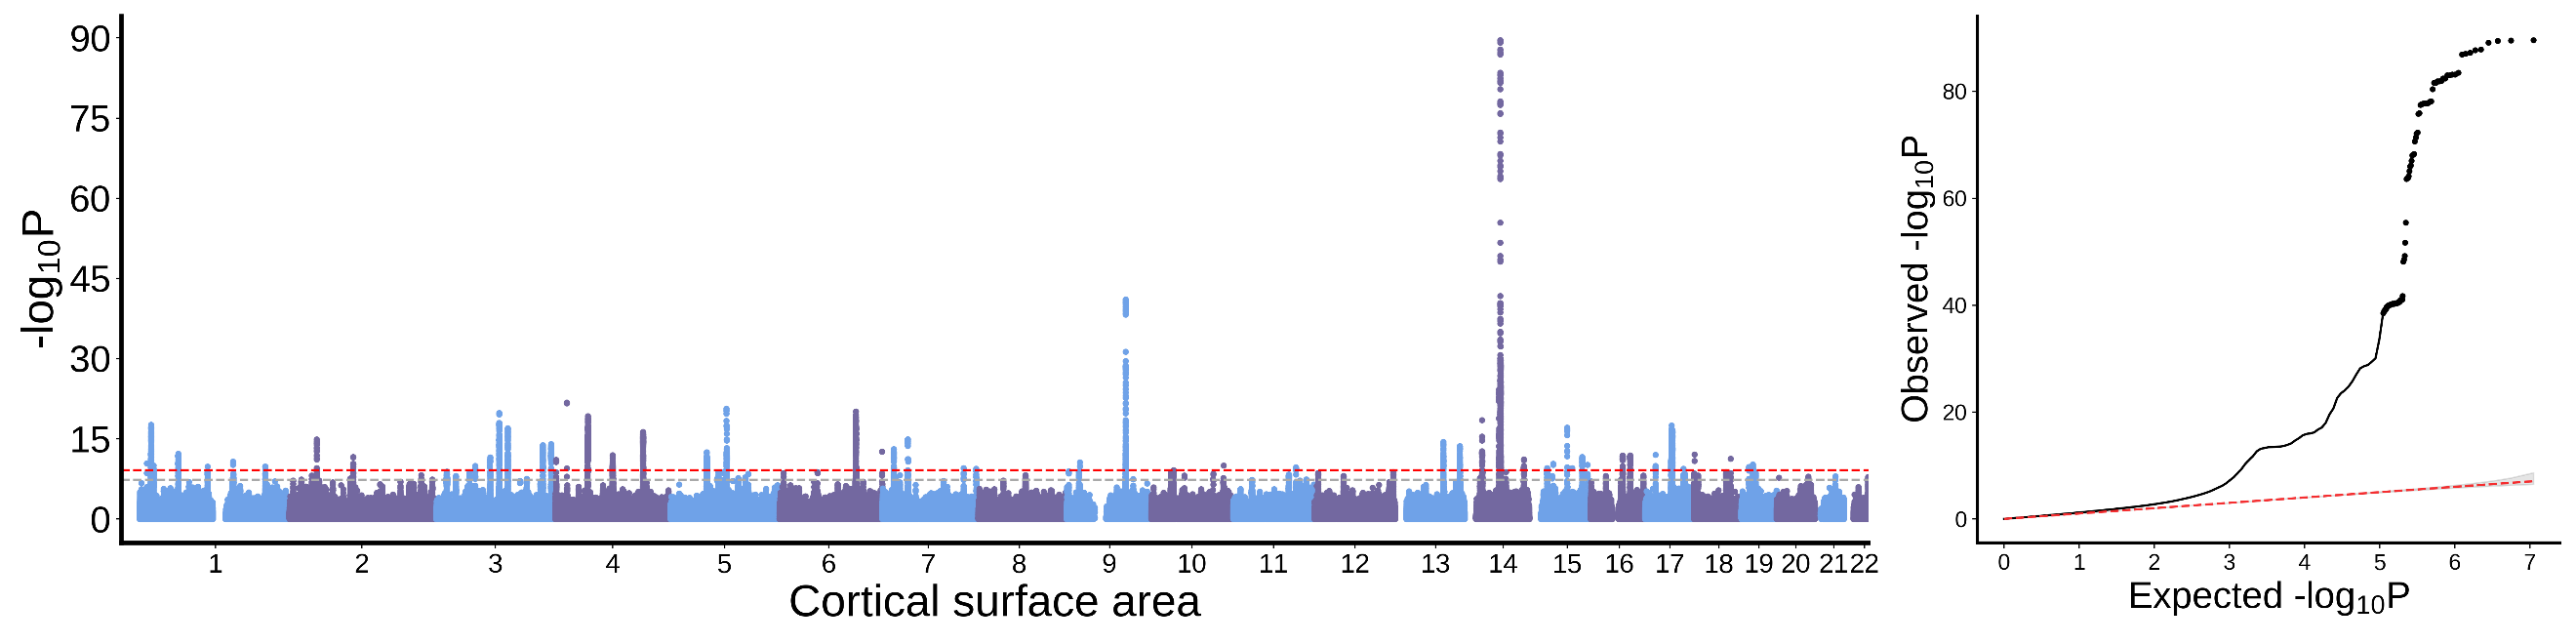


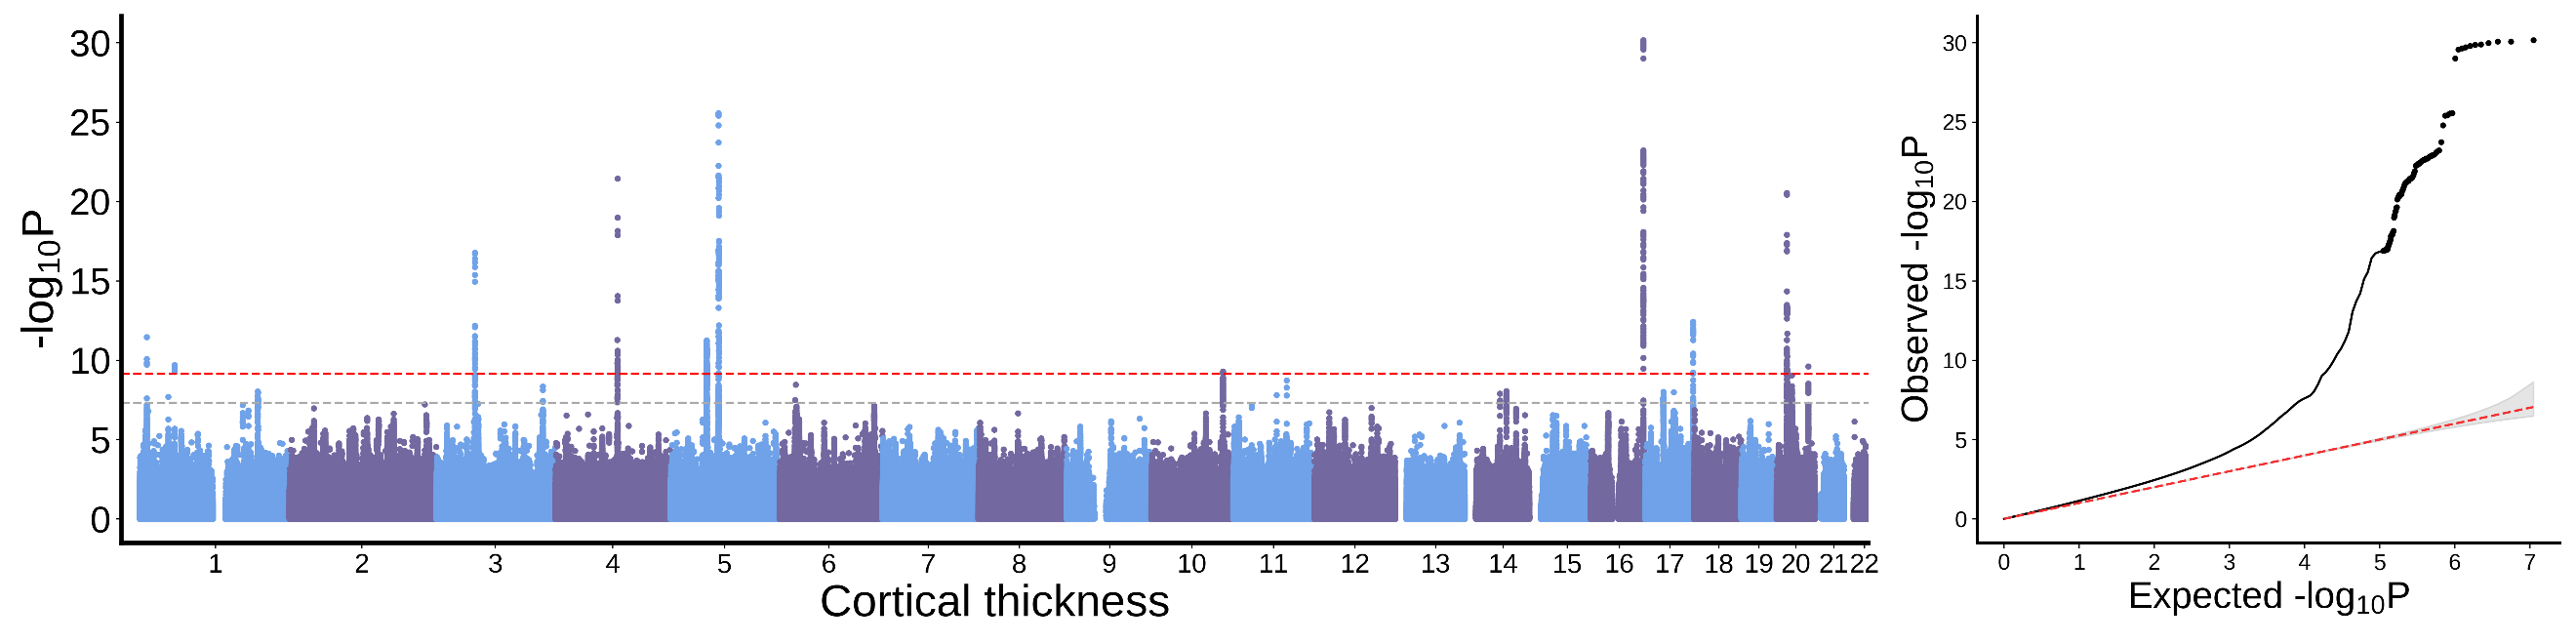


**Fig. S1 |** **Manhattan and quantile-quantile plots for EUR-GWAS meta-analyses of** **cortical thickness and surface area for each cortical region in 80,384 participants.** The meta-analyses are conducted using a fixed-effect model. In each Manhattan plot (left panel), the x-axis shows genomic position and the y-axis shows statistical significance as -log10(*P*). The gray dotted lines denote genome-wide significance (*P* < 5 × 10-8) and the red dotted lines denote significance at *P* < 7.35 × 10-10, further Bonferroni-correcting for 68 cortical IDPs. The Quantile-quantile (Q-Q) plots (right panel) show observed versus expected *P* values for genetic associations with each IDP. The dotted red line shows the distribution of *P* values under the null hypothesis, and the grey shaded area represents 95% confidence interval.


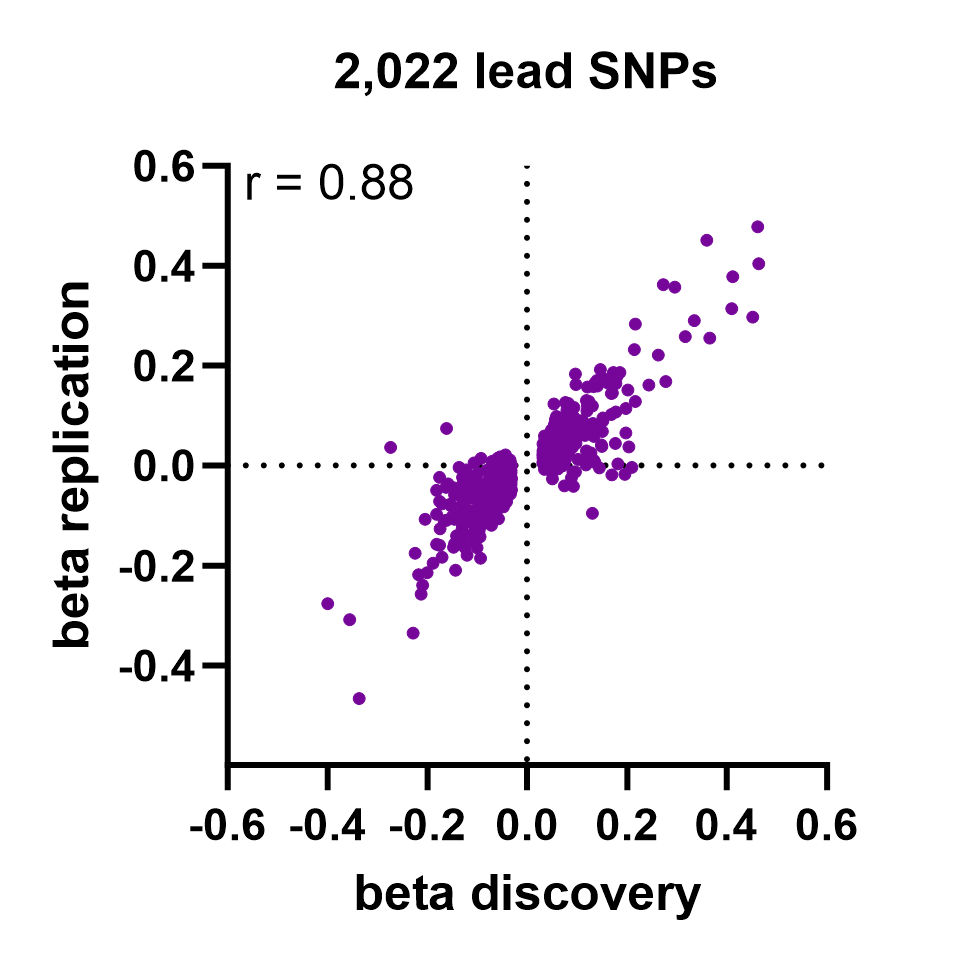


**Fig. S2 | Pearson's correlation of effect sizes between the discovery and replication datasets.** This analysis is performed on 2,022 significant variant-trait associations (*P* < 7.35 × 10-10) in the discovery sample that are also available in the replication sample. Effect sizes are assessed using standardized beta-coefficients.


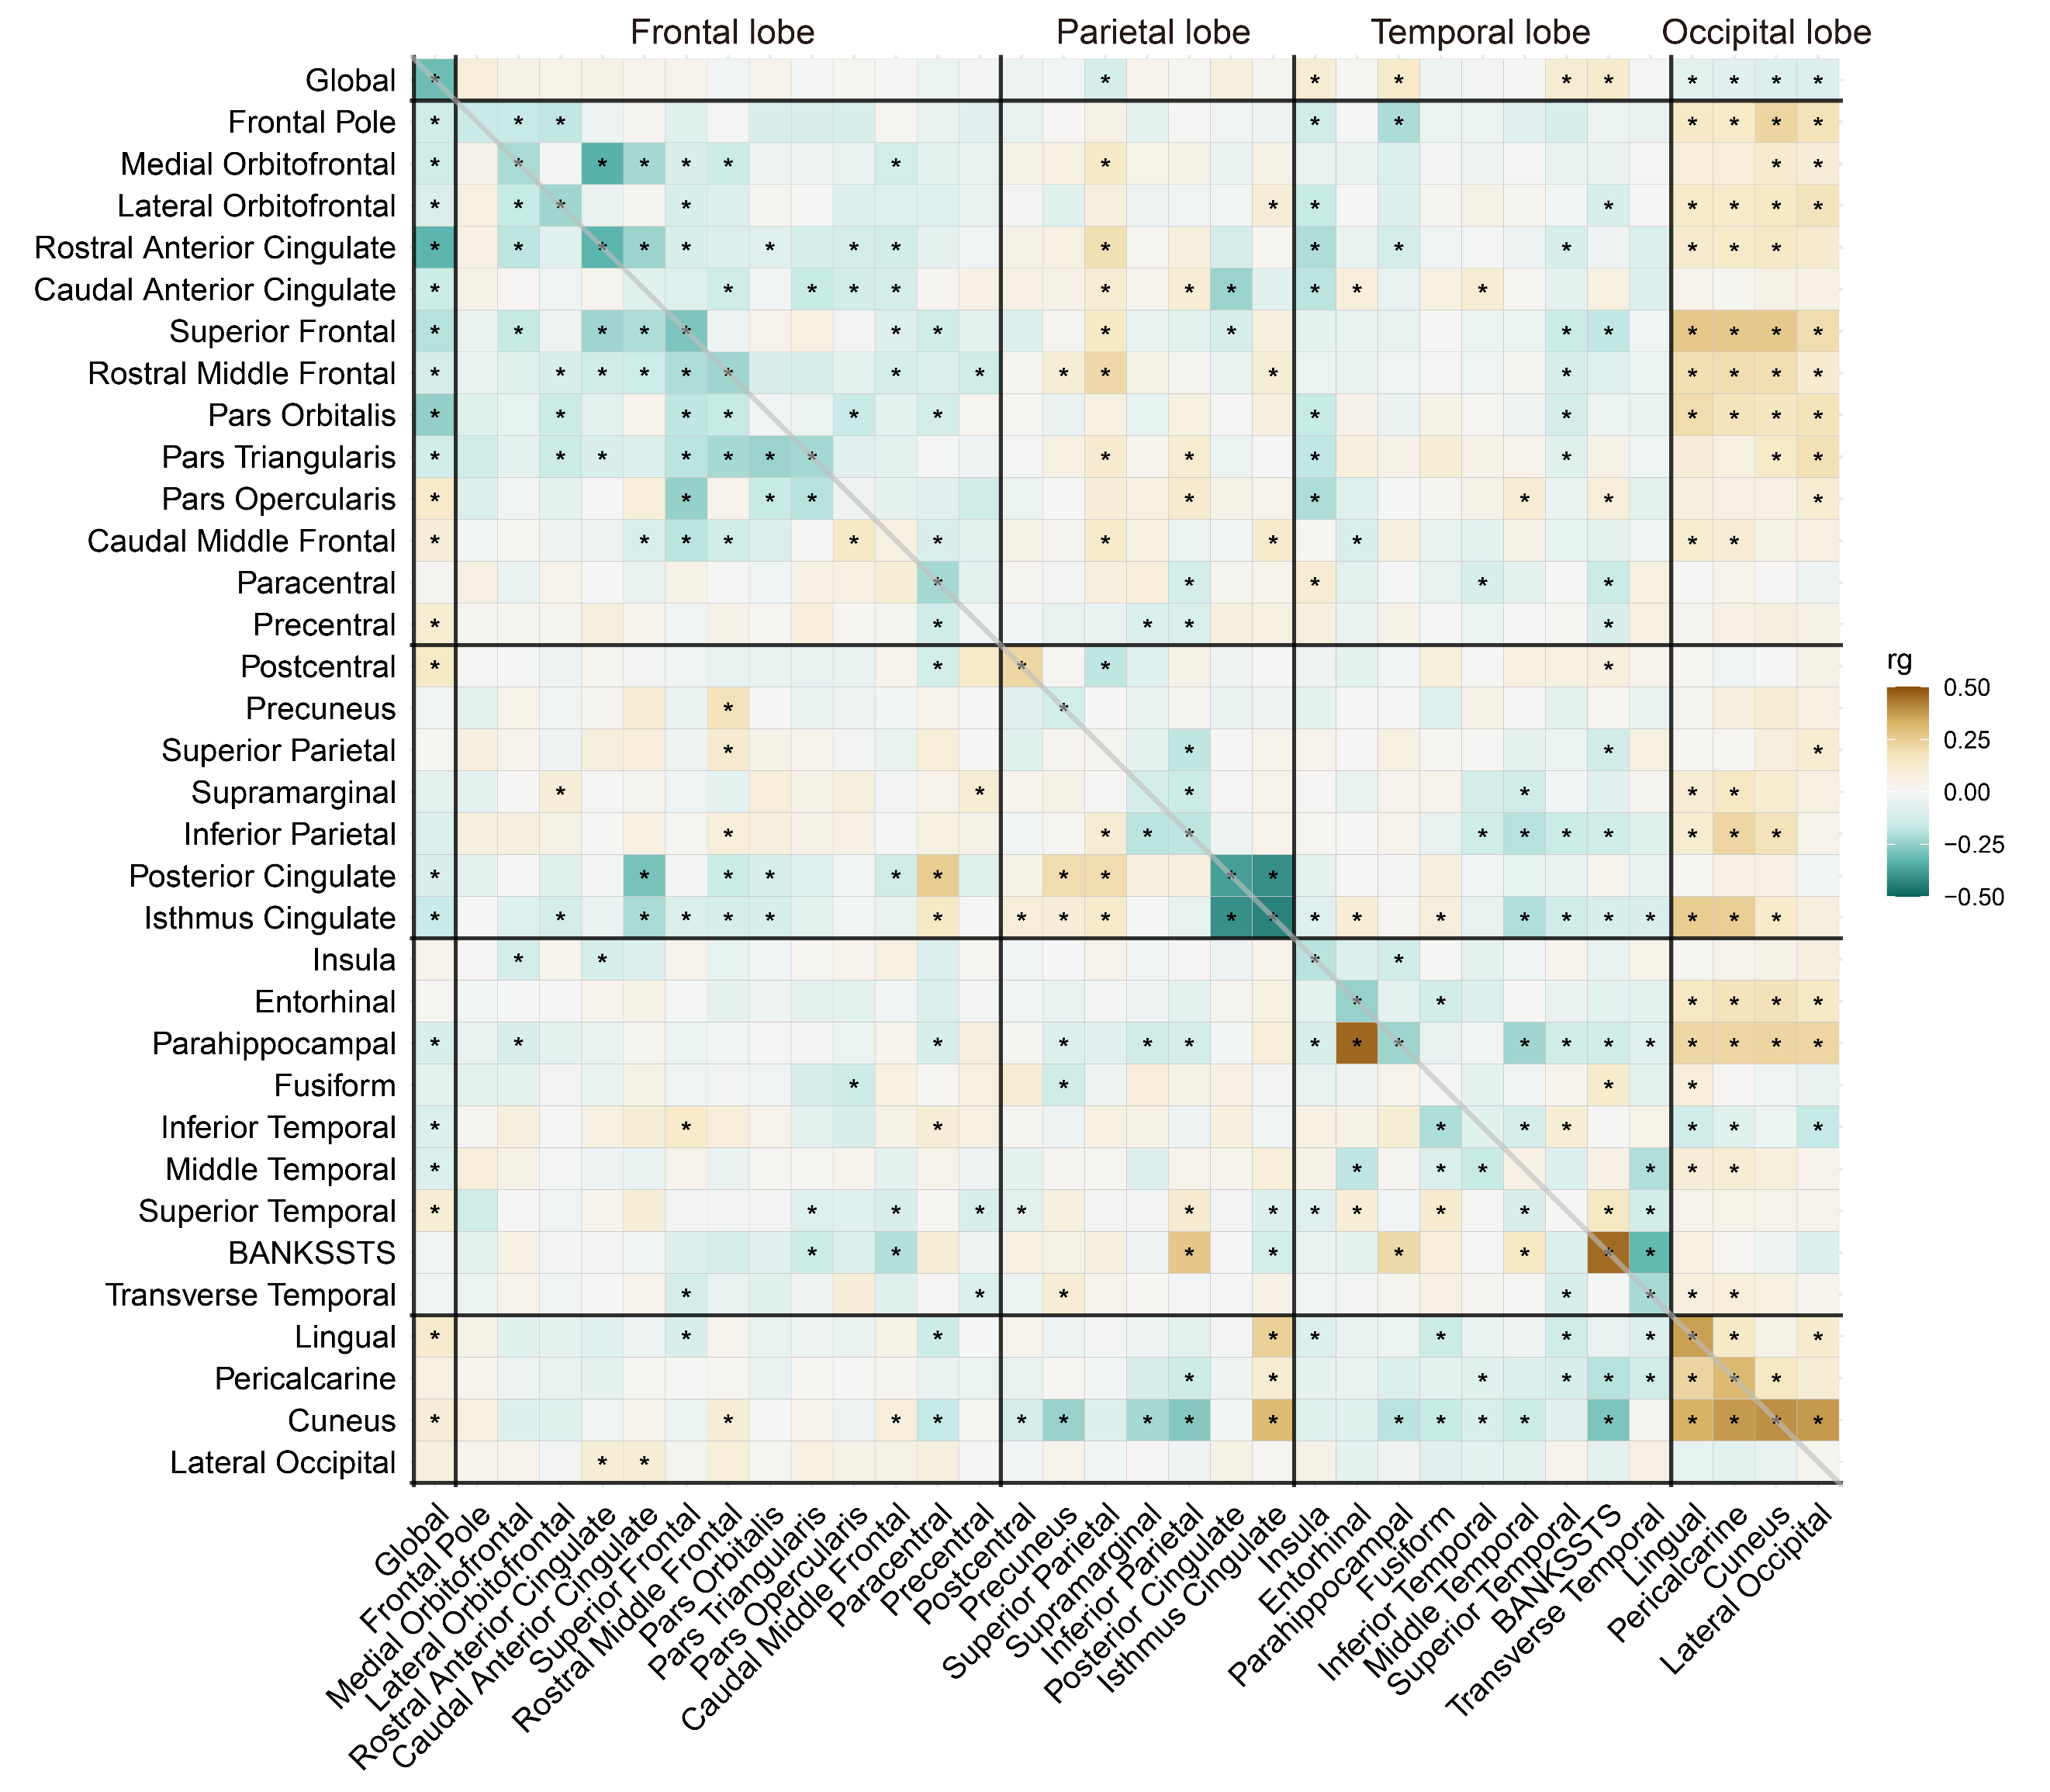


**Fig. S3 | Genetic correlations between SA-IDPs (x-axis) and CT-IDPs (y-axis)**. Bonferroni-corrected significance: **Pc* < 0.05, ***Pc* < 0.01, ****Pc* < 0.001.


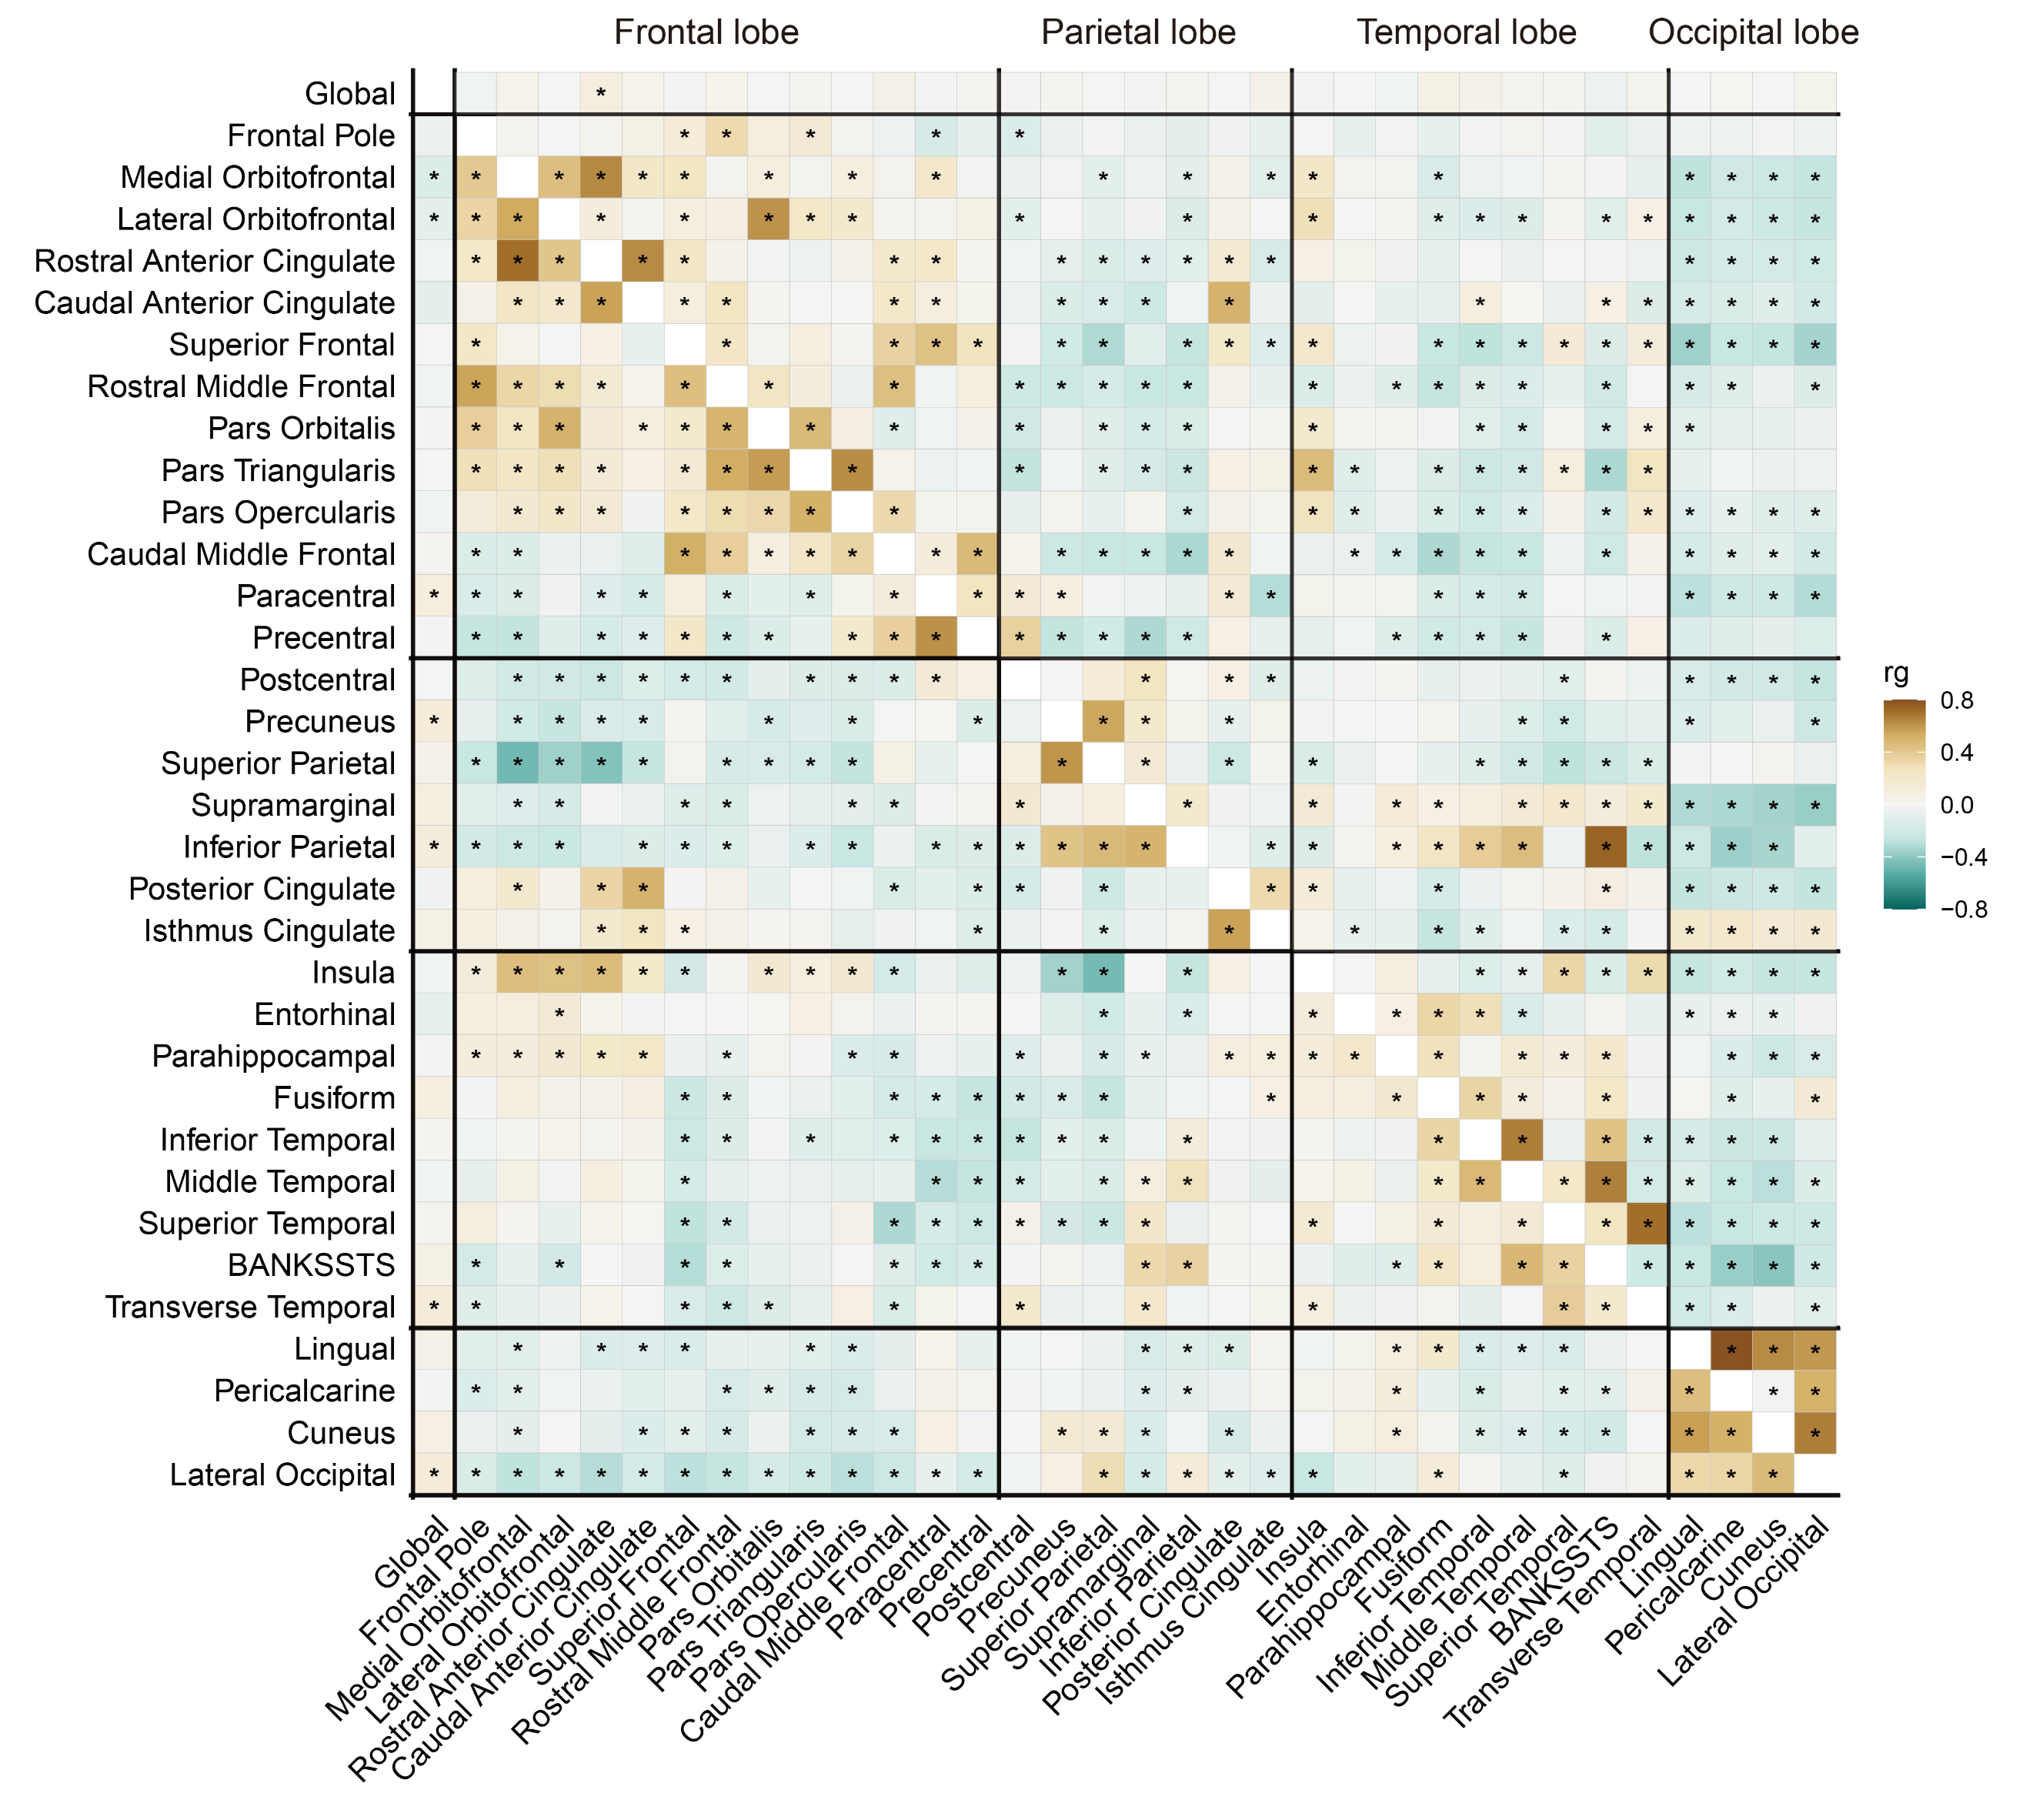


**Fig. S4 | Genetic correlations within CT-IDPs and within SA-IDPs.** Genetic correlations for SA-IDPs are shown in the upper triangle, while those for CT-IDPs are shown in the lower triangle. Bonferroni-corrected significance: **Pc* < 0.05, ***Pc* < 0.01, ****Pc* < 0.001.


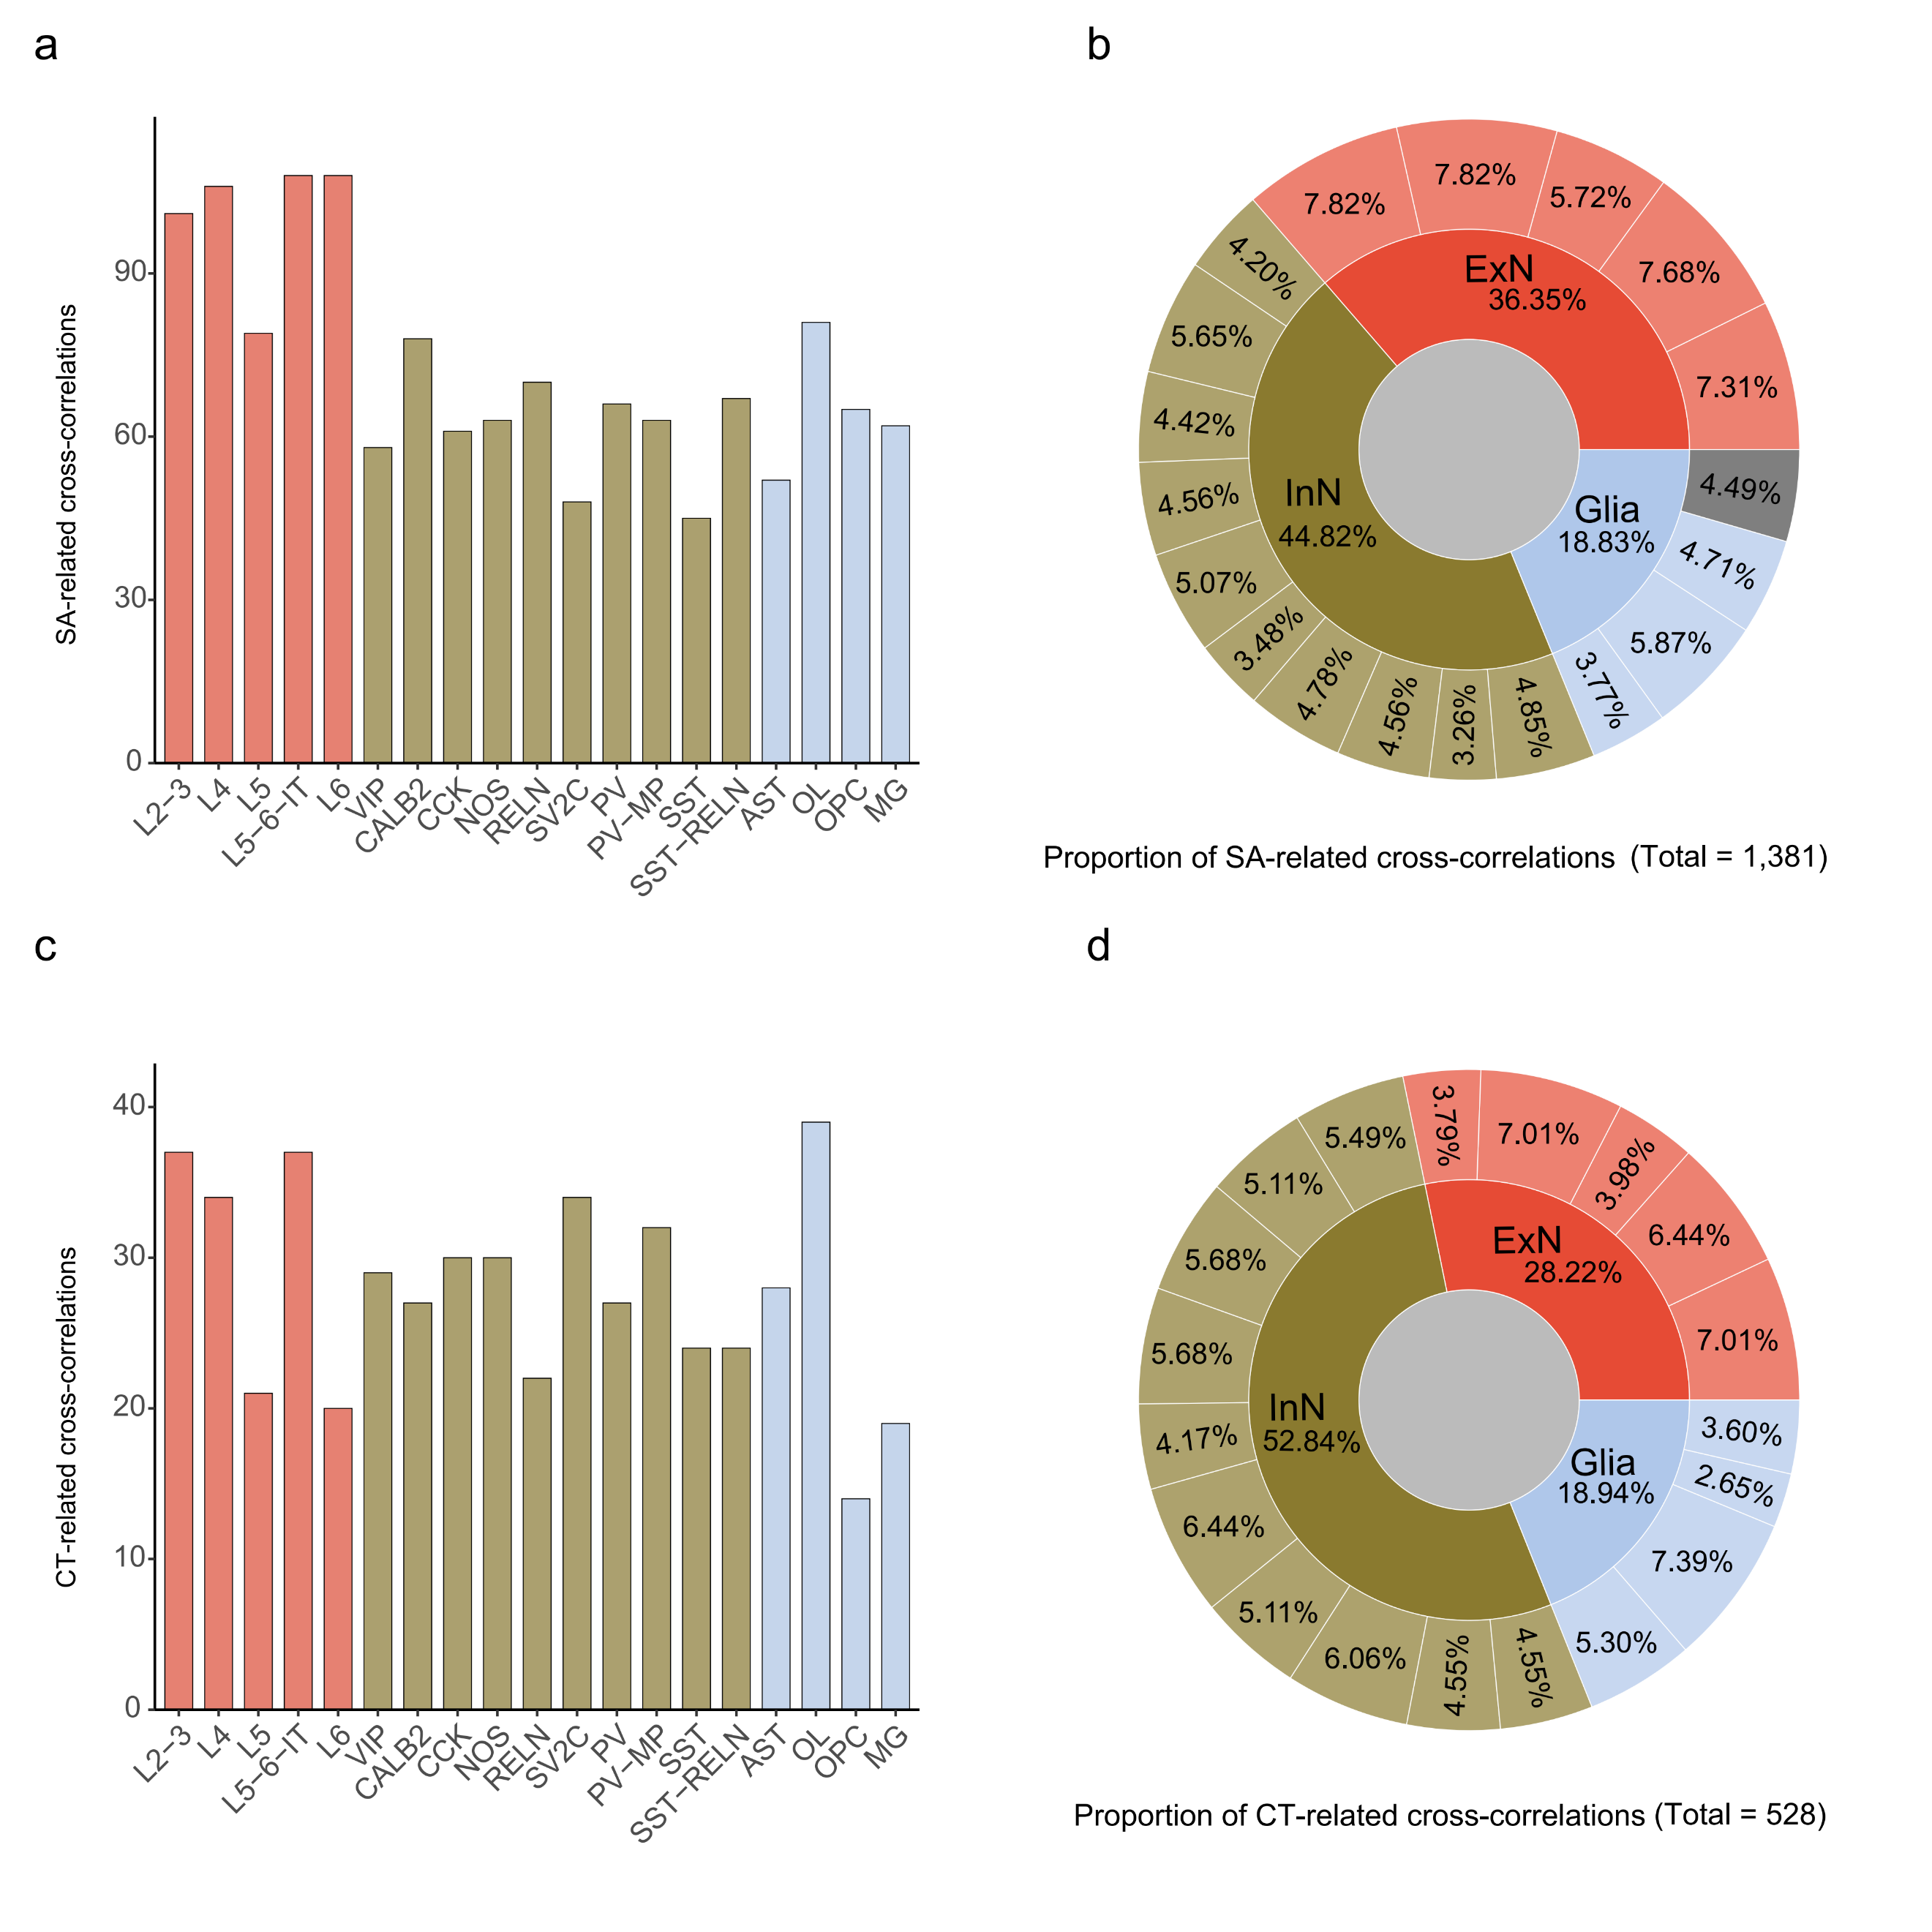


**Fig. S5 | Cross-correlations of cell type-specific gene expression curves with SA and CT growth-rate curves during development in the validation dataset. a,** Counts of SA cross-correlations (|*rxy* (*k*)| > 0.8; n = 1,381) for the 19 cell types. **b,** Sunburst chart illustrates the proportions of SA cross-correlations across major cell types (inner ring) and their subtypes (outer ring). **c,** Counts of CT cross-correlations (|*rxy* (*k*)| > 0.8; n = 528) for the 19 cell types. **d,** Sunburst chart illustrates the proportions of CT cross-correlations across major cell types (inner ring) and their subtypes (outer ring).


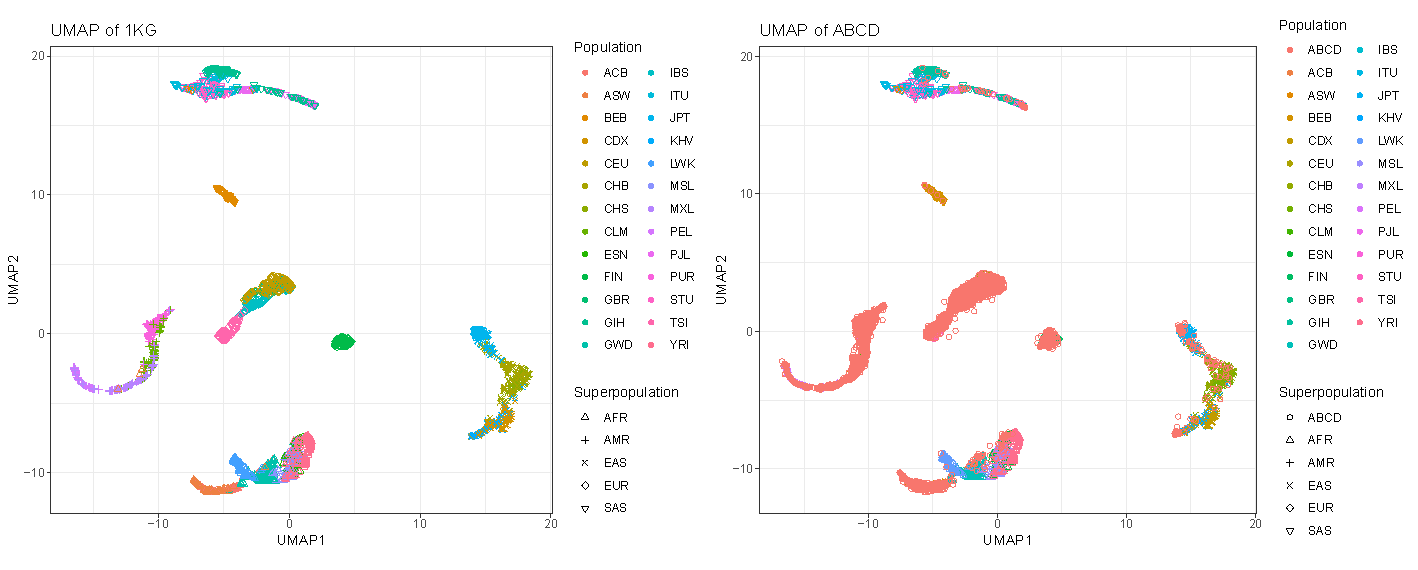


**Fig. S6 | UMAP (uniform manifold approximation and projection) of the 1000 genome (left panel) and ABCD (right panel) populations using the first four genetic principal components.**
